# Supplementary material
Source: Research Square preprint supplement (doi:10.21203/rs.3.rs-10366105/v1)
Supplement: Supplementary file 2 [file b440e98636d37496c1953960.docx]

Table of Contents

[Table of Contents 1](#_Toc234921159)

[Replication rate differences 2](#_Toc234921160)

[Sex-specific associations 2](#_Toc234921161)

[Dyslipidemia traits 2](#_Toc234921162)

[Simultaneous HbA1c and glucose altering associations 3](#_Toc234921163)

[Calculation of carrier frequency and genetic prevalence 3](#_Toc234921164)

[Genetic ancestry 4](#_Toc234921165)

[References 5](#_Toc234921166)

Replication rate differences

Replication rates varied substantially across cardiometabolic phenotype groups. Dyslipidemia showed the highest replication rate (85%), followed by hypertension (43%), obesity (39%), diabetes mellitus (20%), and chronic kidney disease (3%). These differences may reflect variation in age at onset, disease severity, clinical management, phenotype ascertainment, and representation within UK Biobank, rather than differences in genetic relevance alone.

For example, 84 of the 160 curated chronic kidney disease genes originated from the PanelApp “Unexplained kidney failure in young people” panel, which defines the phenotype as a requirement for renal replacement therapy before 50 years of age in the absence of an identified cause. Severe early-onset kidney disease may be underrepresented in an adult volunteer cohort such as UK Biobank, reducing power to replicate these associations.

Sex-specific associations

We performed combined-sex analyses adjusted for genetic sex and sex-specific analyses conducted separately in genetically female and male participants. A gene–phenotype association could reach genome-wide significance in both analysis types. For descriptive prioritization, we classified an association as sex-specific when the corresponding sex-specific analysis yielded a lower P value than the combined-sex analysis.

For associations evaluated jointly across HbA1c and glucose, or across continuous dyslipidemia traits, we used the geometric mean of P values across the constituent traits as a summary metric. Comparisons were made within the same ancestry meta-analysis, allele-frequency threshold, and variant mask.

Dyslipidemia traits

We analyzed genes that influenced lipid traits, in addition to binary traits, in a consistent atherogenic or anti-atherogenic direction, defined as increasing LDL cholesterol, total cholesterol, triglycerides, lipoprotein(a), and apolipoprotein B while decreasing HDL cholesterol or apolipoprotein A, or showing the reverse pattern. We then classified genes according to whether the same variant set affected a single lipid trait or multiple lipid traits. Genes affecting multiple lipid traits were further subdivided into atherogenic, protective, and mixed categories. Mixed genes were defined as those whose variant sets showed both atherogenic and protective effects across traits, such as increasing both HDL and LDL cholesterol levels. For prioritization, we focused on genes affecting multiple lipid traits that were classified as either atherogenic or protective.

Simultaneous HbA1c and glucose altering associations

To assess whether requiring associations with both HbA1c and glucose prioritized biologically relevant diabetes genes, we compared genes associated with HbA1c alone, glucose alone, or both traits. We identified 360 genes associated with HbA1c and 321 associated with glucose, with 70 genes associated with both phenotypes. This corresponded to 290 HbA1c-only and 251 glucose-only genes.

Known diabetes genes were more frequent among genes associated with both glycemic traits: 9 of 70 genes (12.9%) were established diabetes genes, compared with 4 of 290 genes (1.4%) associated only with HbA1c and 2 of 251 genes (0.8%) associated only with glucose.

Calculation of carrier frequency and genetic prevalence

Carrier frequency and genetic prevalence were estimated for genes associated with cardiometabolic risk or protection using allele-frequency data from the eight genetic ancestry groups represented in gnomAD: African, Admixed American, Ashkenazi Jewish, East Asian, Finnish, Middle Eastern, non-Finnish European, and South Asian. This approach was adapted from our previous genome-first analysis of inherited disease burden1.

We restricted the analysis to gene–phenotype associations supported by non-singleton burden masks. For each prioritized gene, variants classified by AAVC as pathogenic or likely pathogenic were retained. Variant-level allele frequency was calculated as allele count divided by allele number.

For each gene and ancestry group, cumulative allele frequency (CAF) was calculated as the sum of the allele frequencies of qualifying pathogenic and likely pathogenic variants.

Assuming Hardy–Weinberg equilibrium and independent assortment of qualifying variants, carrier frequency was estimated as

for autosomes and

for X-linked disorders.

For the present study, genetic prevalence was defined as the estimated proportion of individuals carrying at least one qualifying pathogenic or likely pathogenic genotype in a gene associated with the corresponding cardiometabolic phenotype. For each gene–phenotype association, ancestry-specific estimates were calculated separately and summarized as the unweighted mean across the eight gnomAD ancestry groups.

Each gene was counted once within a phenotype group, irrespective of the number of associated traits. Genes associated with multiple phenotype groups could contribute to more than one group. These estimates represent the population frequency of genetically defined risk- or protective-genotype carriage and should not be interpreted as clinical disease prevalence, because penetrance, effect size, environmental exposures, and gene–gene interactions were not incorporated.

We also estimated cumulative genetic prevalence using only previously known cardiometabolic disease genes, before incorporating the novel associations identified in this study. Under this definition, nearly 1 in 7 individuals carried a risk genotype for at least one cardiometabolic phenotype. The cumulative prevalence of risk genotypes was 1 in 22 for dyslipidemia, 1 in 23 for diabetes mellitus, 1 in 32 for chronic kidney disease, 1 in 56 for hypertension, and 1 in 76 for obesity.

In contrast, 1 in 11 individuals carried a genotype associated with a favorable cardiometabolic profile. The cumulative prevalence of favorable genotypes was 1 in 12 for dyslipidemia, 1 in 127 for hypertension, 1 in 144 for diabetes mellitus, and 1 in 470 for obesity.

Genetic ancestry

Genetic ancestry in UK Biobank was assigned by projecting principal components 1–20 onto a 1000 Genomes Project2 and Human Genome Diversity Project3 reference panel and training a random forest classifier on the same feature set. Individuals were assigned to African (AFR), Admixed American (AMR), Central/South Asian (CSA), East Asian (EAS), or European (EUR) ancestry groups, while samples with ancestry prediction probability below 0.9 were assigned to other (OTH) category. The final ancestry counts were 7,933 AFR, 574 AMR, 9,239 CSA, 2,259 EAS, 447,742 EUR, and 15,564 OTH.

References

1. Kayaalp, B. *et al.* Inherited burden for disease predisposition in diverse populations. *NPJ Genom. Med.* **11**, 18 (2026).

2. Auton, A. *et al.* A global reference for human genetic variation. *Nature* **526**, 68–74 (2015).

3. Bergström, A. *et al.* Insights into human genetic variation and population history from 929 diverse genomes. *Science (1979).* **367**, (2020).
