# Supplementary material
Source: Research Square preprint supplement (doi:10.21203/rs.3.rs-10366105/v1)
Supplement: Supplementary file 3 [file eb3473234f2c49567904847f.xlsx]

## Sheet: S. Table 1
#Supplementary Table 1. ICD-10 codes and individual counts per phenotype group.
sex	Trait	Collapsed_ICD10_codes	Num_Cases	Cohort	Trait_type
B	Apolipoprotein_A	.	6831	AFR	QT
F	Apolipoprotein_A	.	3914	AFR	QT
M	Apolipoprotein_A	.	2917	AFR	QT
B	Apolipoprotein_B	.	7361	AFR	QT
F	Apolipoprotein_B	.	4253	AFR	QT
M	Apolipoprotein_B	.	3108	AFR	QT
B	BMI	.	7792	AFR	QT
F	BMI	.	4513	AFR	QT
M	BMI	.	3279	AFR	QT
B	Body_fat_percentage	.	7676	AFR	QT
F	Body_fat_percentage	.	4438	AFR	QT
M	Body_fat_percentage	.	3238	AFR	QT
B	Cholesterol	.	7422	AFR	QT
F	Cholesterol	.	4290	AFR	QT
M	Cholesterol	.	3132	AFR	QT
B	DBP	.	7801	AFR	QT
F	DBP	.	4524	AFR	QT
M	DBP	.	3277	AFR	QT
B	eGFR	.	7420	AFR	QT
F	eGFR	.	4287	AFR	QT
M	eGFR	.	3133	AFR	QT
B	Essential_hypertension	I10;O10.0;O10.01;O10.011;O10.012;O10.013;O10.019;O10.02;O10.03	3301	AFR	BT
F	Essential_hypertension	I10;O10.0;O10.01;O10.011;O10.012;O10.013;O10.019;O10.02;O10.03	1987	AFR	BT
M	Essential_hypertension	I10;O10.0;O10.01;O10.011;O10.012;O10.013;O10.019;O10.02;O10.03	1314	AFR	BT
B	FAI	.	6195	AFR	QT
F	FAI	.	3311	AFR	QT
M	FAI	.	2884	AFR	QT
B	Glucose	.	6852	AFR	QT
F	Glucose	.	3933	AFR	QT
M	Glucose	.	2919	AFR	QT
B	HbA1c	.	6373	AFR	QT
F	HbA1c	.	3705	AFR	QT
M	HbA1c	.	2668	AFR	QT
B	HDL	.	6860	AFR	QT
F	HDL	.	3938	AFR	QT
M	HDL	.	2922	AFR	QT
B	HT_All	I10;I12;I12.0;I12.9;O10;O10.0;O10.01;O10.011;O10.012;O10.013;O10.019;O10.02;O10.03;O10.2;O10.21;O10.211;O10.212;O10.213;O10.219;O10.22;O10.23;O10.9;O10.91;O10.911;O10.912;O10.913;O10.919;O10.92;O10.93;O11;O11.1;O11.2;O11.3;O11.4;O11.5;O11.9;O13;O13.1;O13.2;O13.3;O13.4;O13.5;O13.9;O16;O16.1;O16.2;O16.3;O16.4;O16.5;O16.9	3326	AFR	BT
F	HT_All	I10;I12;I12.0;I12.9;O10;O10.0;O10.01;O10.011;O10.012;O10.013;O10.019;O10.02;O10.03;O10.2;O10.21;O10.211;O10.212;O10.213;O10.219;O10.22;O10.23;O10.9;O10.91;O10.911;O10.912;O10.913;O10.919;O10.92;O10.93;O11;O11.1;O11.2;O11.3;O11.4;O11.5;O11.9;O13;O13.1;O13.2;O13.3;O13.4;O13.5;O13.9;O16;O16.1;O16.2;O16.3;O16.4;O16.5;O16.9	2011	AFR	BT
M	HT_All	I10;I12;I12.0;I12.9;O10;O10.0;O10.01;O10.011;O10.012;O10.013;O10.019;O10.02;O10.03;O10.2;O10.21;O10.211;O10.212;O10.213;O10.219;O10.22;O10.23;O10.9;O10.91;O10.911;O10.912;O10.913;O10.919;O10.92;O10.93;O11;O11.1;O11.2;O11.3;O11.4;O11.5;O11.9;O13;O13.1;O13.2;O13.3;O13.4;O13.5;O13.9;O16;O16.1;O16.2;O16.3;O16.4;O16.5;O16.9	1315	AFR	BT
B	LDL	.	7407	AFR	QT
F	LDL	.	4279	AFR	QT
M	LDL	.	3128	AFR	QT
B	Lipoprotein_A	.	6179	AFR	QT
F	Lipoprotein_A	.	3483	AFR	QT
M	Lipoprotein_A	.	2696	AFR	QT
B	MAP	.	7801	AFR	QT
F	MAP	.	4524	AFR	QT
M	MAP	.	3277	AFR	QT
B	Oestrodiol	.	1953	AFR	QT
F	Oestrodiol	.	1482	AFR	QT
M	Oestrodiol	.	471	AFR	QT
B	PDFF	.	320	AFR	QT
B	SBP	.	7801	AFR	QT
F	SBP	.	4524	AFR	QT
M	SBP	.	3277	AFR	QT
B	SHBG	.	6796	AFR	QT
F	SHBG	.	3894	AFR	QT
M	SHBG	.	2902	AFR	QT
B	Testosterone	.	6714	AFR	QT
F	Testosterone	.	3612	AFR	QT
M	Testosterone	.	3102	AFR	QT
B	Triglycerides	.	7419	AFR	QT
F	Triglycerides	.	4287	AFR	QT
M	Triglycerides	.	3132	AFR	QT
B	Apolipoprotein_A	.	7981	CSA	QT
F	Apolipoprotein_A	.	3633	CSA	QT
M	Apolipoprotein_A	.	4348	CSA	QT
B	Apolipoprotein_B	.	8691	CSA	QT
F	Apolipoprotein_B	.	4019	CSA	QT
M	Apolipoprotein_B	.	4672	CSA	QT
B	BMI	.	8998	CSA	QT
F	BMI	.	4224	CSA	QT
M	BMI	.	4774	CSA	QT
B	Body_fat_percentage	.	9007	CSA	QT
F	Body_fat_percentage	.	4174	CSA	QT
M	Body_fat_percentage	.	4833	CSA	QT
B	Cholesterol	.	8767	CSA	QT
F	Cholesterol	.	4041	CSA	QT
M	Cholesterol	.	4726	CSA	QT
B	DBP	.	8986	CSA	QT
F	DBP	.	4162	CSA	QT
M	DBP	.	4824	CSA	QT
M	DLP_All	E78.0;E78.00;E78.2;E78.4;E78.49;E78.5	1712	CSA	BT
M	DM_All	E10;E10.1;E10.10;E10.11;E10.2;E10.21;E10.22;E10.29;E10.3;E10.31;E10.311;E10.319;E10.32;E10.321;E10.3211;E10.3212;E10.3213;E10.3219;E10.329;E10.3291;E10.3292;E10.3293;E10.3299;E10.33;E10.331;E10.3311;E10.3312;E10.3313;E10.3319;E10.339;E10.3391;E10.3392;E10.3393;E10.3399;E10.34;E10.341;E10.3411;E10.3412;E10.3413;E10.3419;E10.349;E10.3491;E10.3492;E10.3493;E10.3499;E10.35;E10.351;E10.3511;E10.3512;E…	1559	CSA	BT
B	eGFR	.	8767	CSA	QT
F	eGFR	.	4040	CSA	QT
M	eGFR	.	4727	CSA	QT
B	Essential_hypertension	I10;O10.0;O10.01;O10.011;O10.012;O10.013;O10.019;O10.02;O10.03	3927	CSA	BT
F	Essential_hypertension	I10;O10.0;O10.01;O10.011;O10.012;O10.013;O10.019;O10.02;O10.03	1642	CSA	BT
M	Essential_hypertension	I10;O10.0;O10.01;O10.011;O10.012;O10.013;O10.019;O10.02;O10.03	2285	CSA	BT
B	FAI	.	7247	CSA	QT
F	FAI	.	2940	CSA	QT
M	FAI	.	4307	CSA	QT
B	Glucose	.	7999	CSA	QT
F	Glucose	.	3644	CSA	QT
M	Glucose	.	4355	CSA	QT
B	HbA1c	.	8663	CSA	QT
F	HbA1c	.	4018	CSA	QT
M	HbA1c	.	4645	CSA	QT
B	HDL	.	7992	CSA	QT
F	HDL	.	3644	CSA	QT
M	HDL	.	4348	CSA	QT
B	HT_All	I10;I12;I12.0;I12.9;O10;O10.0;O10.01;O10.011;O10.012;O10.013;O10.019;O10.02;O10.03;O10.2;O10.21;O10.211;O10.212;O10.213;O10.219;O10.22;O10.23;O10.9;O10.91;O10.911;O10.912;O10.913;O10.919;O10.92;O10.93;O11;O11.1;O11.2;O11.3;O11.4;O11.5;O11.9;O13;O13.1;O13.2;O13.3;O13.4;O13.5;O13.9;O16;O16.1;O16.2;O16.3;O16.4;O16.5;O16.9	3954	CSA	BT
F	HT_All	I10;I12;I12.0;I12.9;O10;O10.0;O10.01;O10.011;O10.012;O10.013;O10.019;O10.02;O10.03;O10.2;O10.21;O10.211;O10.212;O10.213;O10.219;O10.22;O10.23;O10.9;O10.91;O10.911;O10.912;O10.913;O10.919;O10.92;O10.93;O11;O11.1;O11.2;O11.3;O11.4;O11.5;O11.9;O13;O13.1;O13.2;O13.3;O13.4;O13.5;O13.9;O16;O16.1;O16.2;O16.3;O16.4;O16.5;O16.9	1666	CSA	BT
M	HT_All	I10;I12;I12.0;I12.9;O10;O10.0;O10.01;O10.011;O10.012;O10.013;O10.019;O10.02;O10.03;O10.2;O10.21;O10.211;O10.212;O10.213;O10.219;O10.22;O10.23;O10.9;O10.91;O10.911;O10.912;O10.913;O10.919;O10.92;O10.93;O11;O11.1;O11.2;O11.3;O11.4;O11.5;O11.9;O13;O13.1;O13.2;O13.3;O13.4;O13.5;O13.9;O16;O16.1;O16.2;O16.3;O16.4;O16.5;O16.9	2288	CSA	BT
B	LDL	.	8749	CSA	QT
F	LDL	.	4035	CSA	QT
M	LDL	.	4714	CSA	QT
B	Lipoprotein_A	.	7714	CSA	QT
F	Lipoprotein_A	.	3541	CSA	QT
M	Lipoprotein_A	.	4173	CSA	QT
B	MAP	.	8986	CSA	QT
F	MAP	.	4162	CSA	QT
M	MAP	.	4824	CSA	QT
B	Oestrodiol	.	1589	CSA	QT
F	Oestrodiol	.	1133	CSA	QT
M	Oestrodiol	.	456	CSA	QT
B	PDFF	.	522	CSA	QT
M	PDFF	.	333	CSA	QT
M	Pure_hypercholesterolemia	E78.0;E78.00	1629	CSA	BT
B	SBP	.	8986	CSA	QT
F	SBP	.	4162	CSA	QT
M	SBP	.	4824	CSA	QT
B	SHBG	.	7947	CSA	QT
F	SHBG	.	3619	CSA	QT
M	SHBG	.	4328	CSA	QT
B	Testosterone	.	7952	CSA	QT
F	Testosterone	.	3267	CSA	QT
M	Testosterone	.	4685	CSA	QT
B	Triglycerides	.	8758	CSA	QT
F	Triglycerides	.	4039	CSA	QT
M	Triglycerides	.	4719	CSA	QT
M	Type_2_diabetes	E11;E11.0;E11.00;E11.01;E11.1;E11.10;E11.11;E11.2;E11.21;E11.22;E11.29;E11.3;E11.31;E11.311;E11.319;E11.32;E11.321;E11.3211;E11.3212;E11.3213;E11.3219;E11.329;E11.3291;E11.3292;E11.3293;E11.3299;E11.33;E11.331;E11.3311;E11.3312;E11.3313;E11.3319;E11.339;E11.3391;E11.3392;E11.3393;E11.3399;E11.34;E11.341;E11.3411;E11.3412;E11.3413;E11.3419;E11.349;E11.3491;E11.3492;E11.3493;E11.3499;E11.35;E11.351…	1557	CSA	BT
B	Apolipoprotein_A	.	1925	EAS	QT
F	Apolipoprotein_A	.	1310	EAS	QT
B	Apolipoprotein_B	.	2118	EAS	QT
F	Apolipoprotein_B	.	1449	EAS	QT
B	BMI	.	2235	EAS	QT
F	BMI	.	1527	EAS	QT
B	Body_fat_percentage	.	2210	EAS	QT
F	Body_fat_percentage	.	1509	EAS	QT
B	Cholesterol	.	2134	EAS	QT
F	Cholesterol	.	1459	EAS	QT
F	DBP	.	1472	EAS	QT
B	eGFR	.	2133	EAS	QT
F	eGFR	.	1458	EAS	QT
F	Essential_hypertension	I10;O10.0;O10.01;O10.011;O10.012;O10.013;O10.019;O10.02;O10.03	370	EAS	BT
B	FAI	.	1792	EAS	QT
F	FAI	.	1184	EAS	QT
B	Glucose	.	1944	EAS	QT
F	Glucose	.	1328	EAS	QT
B	HbA1c	.	2135	EAS	QT
F	HbA1c	.	1462	EAS	QT
B	HDL	.	1944	EAS	QT
F	HDL	.	1328	EAS	QT
F	HT_All	I10;I12;I12.0;I12.9;O10;O10.0;O10.01;O10.011;O10.012;O10.013;O10.019;O10.02;O10.03;O10.2;O10.21;O10.211;O10.212;O10.213;O10.219;O10.22;O10.23;O10.9;O10.91;O10.911;O10.912;O10.913;O10.919;O10.92;O10.93;O11;O11.1;O11.2;O11.3;O11.4;O11.5;O11.9;O13;O13.1;O13.2;O13.3;O13.4;O13.5;O13.9;O16;O16.1;O16.2;O16.3;O16.4;O16.5;O16.9	378	EAS	BT
B	LDL	.	2132	EAS	QT
F	LDL	.	1458	EAS	QT
B	Lipoprotein_A	.	1907	EAS	QT
F	Lipoprotein_A	.	1302	EAS	QT
F	MAP	.	1472	EAS	QT
B	Oestrodiol	.	502	EAS	QT
F	Oestrodiol	.	444	EAS	QT
F	SBP	.	1472	EAS	QT
B	SHBG	.	1931	EAS	QT
F	SHBG	.	1320	EAS	QT
B	Testosterone	.	1972	EAS	QT
F	Testosterone	.	1303	EAS	QT
B	Triglycerides	.	2133	EAS	QT
F	Triglycerides	.	1458	EAS	QT
B	Apolipoprotein_A	.	388632	EUR	QT
F	Apolipoprotein_A	.	208425	EUR	QT
M	Apolipoprotein_A	.	180207	EUR	QT
B	Apolipoprotein_B	.	424913	EUR	QT
F	Apolipoprotein_B	.	230698	EUR	QT
M	Apolipoprotein_B	.	194215	EUR	QT
B	BMI	.	445756	EUR	QT
F	BMI	.	241811	EUR	QT
M	BMI	.	203945	EUR	QT
B	Body_fat_percentage	.	439174	EUR	QT
F	Body_fat_percentage	.	238613	EUR	QT
M	Body_fat_percentage	.	200561	EUR	QT
B	Cholesterol	.	427003	EUR	QT
F	Cholesterol	.	231465	EUR	QT
M	Cholesterol	.	195538	EUR	QT
B	Chronic_kidney_disease	N18;N18.1;N18.2;N18.3;N18.30;N18.31;N18.32;N18.4;N18.8;N18.9;O10.3;O10.31;O10.311;O10.312;O10.313;O10.319;O10.32;O10.33	23225	EUR	BT
F	Chronic_kidney_disease	N18;N18.1;N18.2;N18.3;N18.30;N18.31;N18.32;N18.4;N18.8;N18.9;O10.3;O10.31;O10.311;O10.312;O10.313;O10.319;O10.32;O10.33	11275	EUR	BT
M	Chronic_kidney_disease	N18;N18.1;N18.2;N18.3;N18.30;N18.31;N18.32;N18.4;N18.8;N18.9;O10.3;O10.31;O10.311;O10.312;O10.313;O10.319;O10.32;O10.33	11950	EUR	BT
B	CKD_All	N18;N18.0;N18.1;N18.2;N18.3;N18.30;N18.31;N18.32;N18.4;N18.5;N18.6;N18.8;N18.9;O10.3;O10.31;O10.311;O10.312;O10.313;O10.319;O10.32;O10.33	23468	EUR	BT
F	CKD_All	N18;N18.0;N18.1;N18.2;N18.3;N18.30;N18.31;N18.32;N18.4;N18.5;N18.6;N18.8;N18.9;O10.3;O10.31;O10.311;O10.312;O10.313;O10.319;O10.32;O10.33	11373	EUR	BT
M	CKD_All	N18;N18.0;N18.1;N18.2;N18.3;N18.30;N18.31;N18.32;N18.4;N18.5;N18.6;N18.8;N18.9;O10.3;O10.31;O10.311;O10.312;O10.313;O10.319;O10.32;O10.33	12095	EUR	BT
B	DBP	.	421425	EUR	QT
F	DBP	.	228326	EUR	QT
M	DBP	.	193099	EUR	QT
B	Diabetes_mellitus	O24;O24.9;O24.91;O24.911;O24.912;O24.913;O24.919;O24.92;O24.93;P70.2;Z86.31	29	EUR	BT
F	Diabetes_mellitus	O24;O24.9;O24.91;O24.911;O24.912;O24.913;O24.919;O24.92;O24.93;P70.2;Z86.31	29	EUR	BT
B	DLP_All	E78.0;E78.00;E78.2;E78.4;E78.49;E78.5	75206	EUR	BT
F	DLP_All	E78.0;E78.00;E78.2;E78.4;E78.49;E78.5	32042	EUR	BT
M	DLP_All	E78.0;E78.00;E78.2;E78.4;E78.49;E78.5	43164	EUR	BT
B	DM_All	E10;E10.1;E10.10;E10.11;E10.2;E10.21;E10.22;E10.29;E10.3;E10.31;E10.311;E10.319;E10.32;E10.321;E10.3211;E10.3212;E10.3213;E10.3219;E10.329;E10.3291;E10.3292;E10.3293;E10.3299;E10.33;E10.331;E10.3311;E10.3312;E10.3313;E10.3319;E10.339;E10.3391;E10.3392;E10.3393;E10.3399;E10.34;E10.341;E10.3411;E10.3412;E10.3413;E10.3419;E10.349;E10.3491;E10.3492;E10.3493;E10.3499;E10.35;E10.351;E10.3511;E10.3512;E…	38671	EUR	BT
F	DM_All	E10;E10.1;E10.10;E10.11;E10.2;E10.21;E10.22;E10.29;E10.3;E10.31;E10.311;E10.319;E10.32;E10.321;E10.3211;E10.3212;E10.3213;E10.3219;E10.329;E10.3291;E10.3292;E10.3293;E10.3299;E10.33;E10.331;E10.3311;E10.3312;E10.3313;E10.3319;E10.339;E10.3391;E10.3392;E10.3393;E10.3399;E10.34;E10.341;E10.3411;E10.3412;E10.3413;E10.3419;E10.349;E10.3491;E10.3492;E10.3493;E10.3499;E10.35;E10.351;E10.3511;E10.3512;E…	15597	EUR	BT
M	DM_All	E10;E10.1;E10.10;E10.11;E10.2;E10.21;E10.22;E10.29;E10.3;E10.31;E10.311;E10.319;E10.32;E10.321;E10.3211;E10.3212;E10.3213;E10.3219;E10.329;E10.3291;E10.3292;E10.3293;E10.3299;E10.33;E10.331;E10.3311;E10.3312;E10.3313;E10.3319;E10.339;E10.3391;E10.3392;E10.3393;E10.3399;E10.34;E10.341;E10.3411;E10.3412;E10.3413;E10.3419;E10.349;E10.3491;E10.3492;E10.3493;E10.3499;E10.35;E10.351;E10.3511;E10.3512;E…	23074	EUR	BT
B	eGFR	.	426790	EUR	QT
F	eGFR	.	231365	EUR	QT
M	eGFR	.	195425	EUR	QT
B	Essential_hypertension	I10;O10.0;O10.01;O10.011;O10.012;O10.013;O10.019;O10.02;O10.03	147000	EUR	BT
F	Essential_hypertension	I10;O10.0;O10.01;O10.011;O10.012;O10.013;O10.019;O10.02;O10.03	69681	EUR	BT
M	Essential_hypertension	I10;O10.0;O10.01;O10.011;O10.012;O10.013;O10.019;O10.02;O10.03	77319	EUR	BT
B	FAI	.	352876	EUR	QT
F	FAI	.	174705	EUR	QT
M	FAI	.	178171	EUR	QT
B	Fatty_liver_disease_FLD	K75.81;K76.0	7227	EUR	BT
F	Fatty_liver_disease_FLD	K75.81;K76.0	3678	EUR	BT
M	Fatty_liver_disease_FLD	K75.81;K76.0	3549	EUR	BT
B	Glucose	.	390523	EUR	QT
F	Glucose	.	210169	EUR	QT
M	Glucose	.	180354	EUR	QT
B	HbA1c	.	427098	EUR	QT
F	HbA1c	.	231623	EUR	QT
M	HbA1c	.	195475	EUR	QT
B	HDL	.	390804	EUR	QT
F	HDL	.	210321	EUR	QT
M	HDL	.	180483	EUR	QT
B	HT_All	I10;I12;I12.0;I12.9;O10;O10.0;O10.01;O10.011;O10.012;O10.013;O10.019;O10.02;O10.03;O10.2;O10.21;O10.211;O10.212;O10.213;O10.219;O10.22;O10.23;O10.9;O10.91;O10.911;O10.912;O10.913;O10.919;O10.92;O10.93;O11;O11.1;O11.2;O11.3;O11.4;O11.5;O11.9;O13;O13.1;O13.2;O13.3;O13.4;O13.5;O13.9;O16;O16.1;O16.2;O16.3;O16.4;O16.5;O16.9	147901	EUR	BT
F	HT_All	I10;I12;I12.0;I12.9;O10;O10.0;O10.01;O10.011;O10.012;O10.013;O10.019;O10.02;O10.03;O10.2;O10.21;O10.211;O10.212;O10.213;O10.219;O10.22;O10.23;O10.9;O10.91;O10.911;O10.912;O10.913;O10.919;O10.92;O10.93;O11;O11.1;O11.2;O11.3;O11.4;O11.5;O11.9;O13;O13.1;O13.2;O13.3;O13.4;O13.5;O13.9;O16;O16.1;O16.2;O16.3;O16.4;O16.5;O16.9	70515	EUR	BT
M	HT_All	I10;I12;I12.0;I12.9;O10;O10.0;O10.01;O10.011;O10.012;O10.013;O10.019;O10.02;O10.03;O10.2;O10.21;O10.211;O10.212;O10.213;O10.219;O10.22;O10.23;O10.9;O10.91;O10.911;O10.912;O10.913;O10.919;O10.92;O10.93;O11;O11.1;O11.2;O11.3;O11.4;O11.5;O11.9;O13;O13.1;O13.2;O13.3;O13.4;O13.5;O13.9;O16;O16.1;O16.2;O16.3;O16.4;O16.5;O16.9	77386	EUR	BT
F	Hypercholesterolemia	E78.2	162	EUR	BT
B	Hyperlipidemia	E78.4;E78.49;E78.5	13168	EUR	BT
F	Hyperlipidemia	E78.4;E78.49;E78.5	5293	EUR	BT
M	Hyperlipidemia	E78.4;E78.49;E78.5	7875	EUR	BT
B	LDL	.	426204	EUR	QT
F	LDL	.	231087	EUR	QT
M	LDL	.	195117	EUR	QT
B	Lipoprotein_A	.	339827	EUR	QT
F	Lipoprotein_A	.	184979	EUR	QT
M	Lipoprotein_A	.	154848	EUR	QT
B	MAP	.	421421	EUR	QT
F	MAP	.	228324	EUR	QT
M	MAP	.	193097	EUR	QT
F	Morbid_obesity	E66.01;E66.2;Z68.4;Z68.41;Z68.42;Z68.43;Z68.44;Z68.45	131	EUR	BT
M	Morbid_obesity	E66.01;E66.2;Z68.4;Z68.41;Z68.42;Z68.43;Z68.44;Z68.45	118	EUR	BT
B	Obesity	E66.0;E66.09;E66.1;E66.8;E66.9;O99.21;O99.210;O99.211;O99.212;O99.213;O99.214;O99.215;Z68.3;Z68.30;Z68.31;Z68.32;Z68.33;Z68.34;Z68.35;Z68.36;Z68.37;Z68.38;Z68.39;Z68.54	37050	EUR	BT
F	Obesity	E66.0;E66.09;E66.1;E66.8;E66.9;O99.21;O99.210;O99.211;O99.212;O99.213;O99.214;O99.215;Z68.3;Z68.30;Z68.31;Z68.32;Z68.33;Z68.34;Z68.35;Z68.36;Z68.37;Z68.38;Z68.39;Z68.54	19610	EUR	BT
M	Obesity	E66.0;E66.09;E66.1;E66.8;E66.9;O99.21;O99.210;O99.211;O99.212;O99.213;O99.214;O99.215;Z68.3;Z68.30;Z68.31;Z68.32;Z68.33;Z68.34;Z68.35;Z68.36;Z68.37;Z68.38;Z68.39;Z68.54	17440	EUR	BT
F	Oestrodiol	.	51400	EUR	QT
M	Oestrodiol	.	16584	EUR	QT
B	PDFF	.	43094	EUR	QT
F	PDFF	.	22213	EUR	QT
M	PDFF	.	20881	EUR	QT
B	Pre_existing_diabetes_mellitus_in_pregnancy	O24.0;O24.01;O24.011;O24.012;O24.013;O24.019;O24.02;O24.03;O24.1;O24.11;O24.111;O24.112;O24.113;O24.119;O24.12;O24.13;O24.3;O24.31;O24.311;O24.312;O24.313;O24.319;O24.32;O24.33;O24.8;O24.81;O24.811;O24.812;O24.813;O24.819;O24.82;O24.83	63	EUR	BT
F	Pre_existing_diabetes_mellitus_in_pregnancy	O24.0;O24.01;O24.011;O24.012;O24.013;O24.019;O24.02;O24.03;O24.1;O24.11;O24.111;O24.112;O24.113;O24.119;O24.12;O24.13;O24.3;O24.31;O24.311;O24.312;O24.313;O24.319;O24.32;O24.33;O24.8;O24.81;O24.811;O24.812;O24.813;O24.819;O24.82;O24.83	63	EUR	BT
B	Pure_hypercholesterolemia	E78.0;E78.00	69458	EUR	BT
F	Pure_hypercholesterolemia	E78.0;E78.00	29506	EUR	BT
M	Pure_hypercholesterolemia	E78.0;E78.00	39952	EUR	BT
B	SBP	.	421421	EUR	QT
F	SBP	.	228324	EUR	QT
M	SBP	.	193097	EUR	QT
B	SHBG	.	387230	EUR	QT
F	SHBG	.	208034	EUR	QT
M	SHBG	.	179196	EUR	QT
B	Testosterone	.	386807	EUR	QT
F	Testosterone	.	193142	EUR	QT
M	Testosterone	.	193665	EUR	QT
B	Triglycerides	.	426661	EUR	QT
F	Triglycerides	.	231336	EUR	QT
M	Triglycerides	.	195325	EUR	QT
B	Type_1_diabetes_mellitus	E10;E10.1;E10.10;E10.11;E10.2;E10.21;E10.22;E10.29;E10.3;E10.31;E10.311;E10.319;E10.32;E10.321;E10.3211;E10.3212;E10.3213;E10.3219;E10.329;E10.3291;E10.3292;E10.3293;E10.3299;E10.33;E10.331;E10.3311;E10.3312;E10.3313;E10.3319;E10.339;E10.3391;E10.3392;E10.3393;E10.3399;E10.34;E10.341;E10.3411;E10.3412;E10.3413;E10.3419;E10.349;E10.3491;E10.3492;E10.3493;E10.3499;E10.35;E10.351;E10.3511;E10.3512;E…	4363	EUR	BT
F	Type_1_diabetes_mellitus	E10;E10.1;E10.10;E10.11;E10.2;E10.21;E10.22;E10.29;E10.3;E10.31;E10.311;E10.319;E10.32;E10.321;E10.3211;E10.3212;E10.3213;E10.3219;E10.329;E10.3291;E10.3292;E10.3293;E10.3299;E10.33;E10.331;E10.3311;E10.3312;E10.3313;E10.3319;E10.339;E10.3391;E10.3392;E10.3393;E10.3399;E10.34;E10.341;E10.3411;E10.3412;E10.3413;E10.3419;E10.349;E10.3491;E10.3492;E10.3493;E10.3499;E10.35;E10.351;E10.3511;E10.3512;E…	1841	EUR	BT
M	Type_1_diabetes_mellitus	E10;E10.1;E10.10;E10.11;E10.2;E10.21;E10.22;E10.29;E10.3;E10.31;E10.311;E10.319;E10.32;E10.321;E10.3211;E10.3212;E10.3213;E10.3219;E10.329;E10.3291;E10.3292;E10.3293;E10.3299;E10.33;E10.331;E10.3311;E10.3312;E10.3313;E10.3319;E10.339;E10.3391;E10.3392;E10.3393;E10.3399;E10.34;E10.341;E10.3411;E10.3412;E10.3413;E10.3419;E10.349;E10.3491;E10.3492;E10.3493;E10.3499;E10.35;E10.351;E10.3511;E10.3512;E…	2522	EUR	BT
B	Type_2_diabetes	E11;E11.0;E11.00;E11.01;E11.1;E11.10;E11.11;E11.2;E11.21;E11.22;E11.29;E11.3;E11.31;E11.311;E11.319;E11.32;E11.321;E11.3211;E11.3212;E11.3213;E11.3219;E11.329;E11.3291;E11.3292;E11.3293;E11.3299;E11.33;E11.331;E11.3311;E11.3312;E11.3313;E11.3319;E11.339;E11.3391;E11.3392;E11.3393;E11.3399;E11.34;E11.341;E11.3411;E11.3412;E11.3413;E11.3419;E11.349;E11.3491;E11.3492;E11.3493;E11.3499;E11.35;E11.351…	37599	EUR	BT
F	Type_2_diabetes	E11;E11.0;E11.00;E11.01;E11.1;E11.10;E11.11;E11.2;E11.21;E11.22;E11.29;E11.3;E11.31;E11.311;E11.319;E11.32;E11.321;E11.3211;E11.3212;E11.3213;E11.3219;E11.329;E11.3291;E11.3292;E11.3293;E11.3299;E11.33;E11.331;E11.3311;E11.3312;E11.3313;E11.3319;E11.339;E11.3391;E11.3392;E11.3393;E11.3399;E11.34;E11.341;E11.3411;E11.3412;E11.3413;E11.3419;E11.349;E11.3491;E11.3492;E11.3493;E11.3499;E11.35;E11.351…	15017	EUR	BT
M	Type_2_diabetes	E11;E11.0;E11.00;E11.01;E11.1;E11.10;E11.11;E11.2;E11.21;E11.22;E11.29;E11.3;E11.31;E11.311;E11.319;E11.32;E11.321;E11.3211;E11.3212;E11.3213;E11.3219;E11.329;E11.3291;E11.3292;E11.3293;E11.3299;E11.33;E11.331;E11.3311;E11.3312;E11.3313;E11.3319;E11.339;E11.3391;E11.3392;E11.3393;E11.3399;E11.34;E11.341;E11.3411;E11.3412;E11.3413;E11.3419;E11.349;E11.3491;E11.3492;E11.3493;E11.3499;E11.35;E11.351…	22582	EUR	BT
B	Apolipoprotein_A	.	13441	OTH	QT
F	Apolipoprotein_A	.	7231	OTH	QT
M	Apolipoprotein_A	.	6210	OTH	QT
B	Apolipoprotein_B	.	14724	OTH	QT
F	Apolipoprotein_B	.	8049	OTH	QT
M	Apolipoprotein_B	.	6675	OTH	QT
B	BMI	.	15437	OTH	QT
F	BMI	.	8425	OTH	QT
M	BMI	.	7012	OTH	QT
B	Body_fat_percentage	.	15204	OTH	QT
F	Body_fat_percentage	.	8310	OTH	QT
M	Body_fat_percentage	.	6894	OTH	QT
B	Cholesterol	.	14803	OTH	QT
F	Cholesterol	.	8074	OTH	QT
M	Cholesterol	.	6729	OTH	QT
B	DBP	.	14977	OTH	QT
F	DBP	.	8172	OTH	QT
M	DBP	.	6805	OTH	QT
B	eGFR	.	14792	OTH	QT
F	eGFR	.	8068	OTH	QT
M	eGFR	.	6724	OTH	QT
B	FAI	.	12113	OTH	QT
F	FAI	.	5975	OTH	QT
M	FAI	.	6138	OTH	QT
B	Glucose	.	13505	OTH	QT
F	Glucose	.	7290	OTH	QT
M	Glucose	.	6215	OTH	QT
B	HbA1c	.	14660	OTH	QT
F	HbA1c	.	8001	OTH	QT
M	HbA1c	.	6659	OTH	QT
B	HDL	.	13519	OTH	QT
F	HDL	.	7302	OTH	QT
M	HDL	.	6217	OTH	QT
B	LDL	.	14774	OTH	QT
F	LDL	.	8060	OTH	QT
M	LDL	.	6714	OTH	QT
B	Lipoprotein_A	.	12413	OTH	QT
F	Lipoprotein_A	.	6732	OTH	QT
M	Lipoprotein_A	.	5681	OTH	QT
B	MAP	.	14976	OTH	QT
F	MAP	.	8171	OTH	QT
M	MAP	.	6805	OTH	QT
B	Oestrodiol	.	2965	OTH	QT
F	Oestrodiol	.	2359	OTH	QT
M	Oestrodiol	.	606	OTH	QT
B	PDFF	.	1239	OTH	QT
M	PDFF	.	584	OTH	QT
B	SBP	.	14976	OTH	QT
F	SBP	.	8171	OTH	QT
M	SBP	.	6805	OTH	QT
B	SHBG	.	13375	OTH	QT
F	SHBG	.	7200	OTH	QT
M	SHBG	.	6175	OTH	QT
B	Testosterone	.	13307	OTH	QT
F	Testosterone	.	6645	OTH	QT
M	Testosterone	.	6662	OTH	QT
B	Triglycerides	.	14790	OTH	QT
F	Triglycerides	.	8069	OTH	QT
M	Triglycerides	.	6721	OTH	QT
B	BMI	.	981	TUR	QT
F	BMI	.	752	TUR	QT
M	BMI	.	229	TUR	QT

## Sheet: S. Table 2
#Supplementary Table 2. List of known disease genes curated from literature, PanelApp and OMIM.
Gene	Phenotype	Direction	Inheritance
ACE	CKD	Risk	AR
ACTG2	CKD	Risk	AD
ACTN4	CKD	Risk	AD
AGT	CKD	Risk	AR
AGTR1	CKD	Risk	AR
AHI1	CKD	Risk	AR
ALG5	CKD	Risk	AD
ALG8	CKD	Risk	AD
ALG9	CKD	Risk	Both
ALMS1	CKD	Risk	AR
AMN	CKD	Risk	AR
ANKS6	CKD	Risk	AR
ARHGDIA	CKD	Risk	AR
ARL13B	CKD	Risk	AR
ARL6	CKD	Risk	AR
B9D2	CKD	Risk	AR
BBS1	CKD	Risk	AR
BBS10	CKD	Risk	AR
BBS12	CKD	Risk	AR
BBS2	CKD	Risk	AR
BBS4	CKD	Risk	AR
BBS5	CKD	Risk	AR
BBS7	CKD	Risk	AR
BBS9	CKD	Risk	AR
C3	CKD	Risk	Both
CC2D2A	CKD	Risk	AR
CD46	CKD	Risk	Both
CENPF	CKD	Risk	AR
CEP104	CKD	Risk	AR
CEP164	CKD	Risk	AR
CEP290	CKD	Risk	AR
CEP41	CKD	Risk	AR
CEP83	CKD	Risk	AR
CFB	CKD	Risk	AD
CFH	CKD	Risk	Both
CFHR5	CKD	Risk	AD
CFI	CKD	Risk	Both
CHD7	CKD	Risk	AD
CHRM3	CKD	Risk	AR
CILK1	CKD	Risk	AR
CLCN5	CKD	Risk	XLR
COL4A1	CKD	Risk	AD
COL4A3	CKD	Risk	Both
COL4A4	CKD	Risk	AD
COL4A5	CKD	Risk	XLD
COQ2	CKD	Risk	AR
COQ6	CKD	Risk	AR
COQ8B	CKD	Risk	AR
CPLANE1	CKD	Risk	AR
CRB2	CKD	Risk	AR
CSPP1	CKD	Risk	AR
CTNS	CKD	Risk	AR
CUBN	CKD	Risk	AR
CYP24A1	CKD	Risk	AD
DDX59	CKD	Risk	AR
DGKE	CKD	Risk	AR
DHCR7	CKD	Risk	AR
DLG5	CKD	Risk	Both
DNAJB11	CKD	Risk	AD
DSTYK	CKD	Risk	AD
DYNC2H1	CKD	Risk	AR
DYNC2I1	CKD	Risk	AR
DZIP1L	CKD	Risk	AR
EYA1	CKD	Risk	AD
FAN1	CKD	Risk	AR
FLCN	CKD	Risk	AD
FRAS1	CKD	Risk	AR
FREM1	CKD	Risk	AR
FREM2	CKD	Risk	AR
GANAB	CKD	Risk	AD
GATA3	CKD	Risk	AD
GLA	CKD	Risk	XLD
GLI3	CKD	Risk	AD
GLIS2	CKD	Risk	AR
GRIP1	CKD	Risk	AR
HNF1B	CKD	Risk	AD
HPSE2	CKD	Risk	AR
HYLS1	CKD	Risk	AR
IFT122	CKD	Risk	AR
IFT140	CKD	Risk	Both
IFT172	CKD	Risk	AR
IFT27	CKD	Risk	AR
IFT43	CKD	Risk	AR
INF2	CKD	Risk	AD
INPP5E	CKD	Risk	AR
INVS	CKD	Risk	AR
IQCB1	CKD	Risk	AR
ITGA3	CKD	Risk	AR
ITGA8	CKD	Risk	AR
JAK2	CKD	Risk	AD
KIAA0586	CKD	Risk	AR
KIAA0753	CKD	Risk	AR
KIF7	CKD	Risk	AR
LAMB2	CKD	Risk	AR
LMX1B	CKD	Risk	AD
LRIG2	CKD	Risk	AR
LZTFL1	CKD	Risk	AR
MAPKBP1	CKD	Risk	AR
MKKS	CKD	Risk	AR
MKS1	CKD	Risk	AR
MUC1	CKD	Risk	AD
MYH9	CKD	Risk	AD
MYO1E	CKD	Risk	AR
NEK8	CKD	Risk	AR
NPHP1	CKD	Risk	AR
NPHP3	CKD	Risk	AR
NPHP4	CKD	Risk	AR
NPHS1	CKD	Risk	AR
NPHS2	CKD	Risk	AR
NUP107	CKD	Risk	AR
NUP93	CKD	Risk	AR
OFD1	CKD	Risk	XLD
PAX2	CKD	Risk	AD
PKD1	CKD	Risk	AD
PKD2	CKD	Risk	AD
PKHD1	CKD	Risk	AR
PLCE1	CKD	Risk	AR
PMM2	CKD	Risk	AR
PRKCSH	CKD	Risk	AD
PSKH1	CKD	Risk	AR
REN	CKD	Risk	Both
RPGRIP1L	CKD	Risk	AR
RRM2B	CKD	Risk	AR
SALL1	CKD	Risk	AD
SARS2	CKD	Risk	AR
SCARB2	CKD	Risk	AR
SDCCAG8	CKD	Risk	AR
SEC63	CKD	Risk	AD
SGPL1	CKD	Risk	AR
SMARCAL1	CKD	Risk	AR
TBX18	CKD	Risk	AD
TCTN1	CKD	Risk	AR
TCTN2	CKD	Risk	AR
TCTN3	CKD	Risk	AR
TMEM107	CKD	Risk	AR
TMEM138	CKD	Risk	AR
TMEM216	CKD	Risk	AR
TMEM231	CKD	Risk	AR
TMEM237	CKD	Risk	AR
TMEM67	CKD	Risk	AR
TRAF3IP1	CKD	Risk	AR
TRAP1	CKD	Risk	AR
TRIM8	CKD	Risk	AD
TRPC6	CKD	Risk	AD
TSC1	CKD	Risk	AD
TSC2	CKD	Risk	AD
TTC21B	CKD	Risk	AR
TTC8	CKD	Risk	AR
TULP3	CKD	Risk	AR
TXNDC15	CKD	Risk	AR
UMOD	CKD	Risk	AD
UMOD	CKD	Risk	AD
VHL	CKD	Risk	AD
VIPAS39	CKD	Risk	AR
VPS33B	CKD	Risk	AR
WDPCP	CKD	Risk	AR
WDR19	CKD	Risk	AR
WDR35	CKD	Risk	AR
WT1	CKD	Risk	AD
XPNPEP3	CKD	Risk	AR
ABCA1	DLP	Risk	AD
ABCA6	DLP	Risk	AD
ABCG5	DLP	Risk	AR
ABCG8	DLP	Risk	AR
APOA1	DLP	Risk	AD
APOA2	DLP	Risk	AD
APOA5	DLP	Risk	AD
APOB	DLP	Risk	AD
APOE	DLP	Risk	Both
COL18A1	DLP	Risk	AD
CREB3L3	DLP	Risk	AD
CYP27A1	DLP	Risk	AR
DGAT2	DLP	Risk	AD
EVI5	DLP	Risk	AD
G6PC1	DLP	Risk	AD
GCKR	DLP	Risk	AD
LCAT	DLP	Risk	AD
LDLR	DLP	Risk	AD
LDLRAP1	DLP	Risk	AR
LIPA	DLP	Risk	AR
LPL	DLP	Risk	AD
PCSK9	DLP	Risk	AD
PLA2G12A	DLP	Risk	AD
PPARG	DLP	Risk	AD
SH2B3	DLP	Risk	AD
ANGPTL3	DLP	Protective	AD
ANGPTL4	DLP	Protective	AD
ANGPTL8	DLP	Protective	AD
APOB	DLP	Protective	AD
APOC3	DLP	Protective	AD
ASGR1	DLP	Protective	AD
CD36	DLP	Protective	AD
CETP	DLP	Protective	AD
GCK	DLP	Protective	AD
GIGYF1	DLP	Protective	AD
HBB	DLP	Protective	AD
HMGCR	DLP	Protective	AD
LIPC	DLP	Protective	AD
LIPG	DLP	Protective	AD
NPC1L1	DLP	Protective	AD
NR1H3	DLP	Protective	AD
NR1H4	DLP	Protective	AD
PCSK9	DLP	Protective	AD
PDE3B	DLP	Protective	AD
PLIN1	DLP	Protective	AD
RRBP1	DLP	Protective	AD
TM6SF2	DLP	Protective	AD
ZNF229	DLP	Protective	AD
ABCC8	DM	Risk	Both
AGPAT2	DM	Risk	AR
AIRE	DM	Risk	AR
AKT2	DM	Risk	AD
ALMS1	DM	Risk	AR
ANKH	DM	Risk	AD
APPL1	DM	Risk	AD
BLK	DM	Risk	AD
BSCL2	DM	Risk	AR
CEL	DM	Risk	AD
CISD2	DM	Risk	AR
CNOT1	DM	Risk	AD
DCAF17	DM	Risk	AR
DNAJC3	DM	Risk	AR
DUT	DM	Risk	AR
DYRK1B	DM	Risk	AD
EIF2AK3	DM	Risk	AR
EIF2B1	DM	Risk	AD
EIF2S3	DM	Risk	XLR
FOXP3	DM	Risk	XLR
GATA4	DM	Risk	AD
GATA6	DM	Risk	AD
GCK	DM	Risk	AD
GIGYF1	DM	Risk	AD
GLIS3	DM	Risk	AR
HAMP	DM	Risk	AR
HFE	DM	Risk	AR
HJV	DM	Risk	AR
HNF1A	DM	Risk	AD
HNF1B	DM	Risk	AD
HNF4A	DM	Risk	AD
IER3IP1	DM	Risk	AR
IGF1R	DM	Risk	AD
IGF1R	DM	Risk	AD
IL2RA	DM	Risk	AR
INS	DM	Risk	Both
INSR	DM	Risk	AD
IRS2	DM	Risk	AD
KCNJ11	DM	Risk	AD
LMNA	DM	Risk	AD
LRBA	DM	Risk	AR
MANF	DM	Risk	AR
MNX1	DM	Risk	AR
MTNR1B	DM	Risk	AD
NEUROD1	DM	Risk	AR
NEUROG3	DM	Risk	AR
NKX2-2	DM	Risk	AR
ONECUT1	DM	Risk	AR
PAM	DM	Risk	AD
PAX4	DM	Risk	AD
PAX6	DM	Risk	AD
PCBD1	DM	Risk	AR
PDX1	DM	Risk	AR
PIK3R1	DM	Risk	AD
PLIN1	DM	Risk	AD
POLD1	DM	Risk	AD
PPARG	DM	Risk	AD
PPP1R15B	DM	Risk	AR
PTEN	DM	Risk	AD
PTF1A	DM	Risk	AR
RFX6	DM	Risk	AR
SLC19A2	DM	Risk	AR
SLC29A3	DM	Risk	AR
SLC2A2	DM	Risk	AR
SLC40A1	DM	Risk	AD
SLTM	DM	Risk	AD
SMPD4	DM	Risk	AR
STAT3	DM	Risk	AD
TFR2	DM	Risk	AR
TNRC6B	DM	Risk	AD
TRMT10A	DM	Risk	AR
UBR3	DM	Risk	AD
UCP3	DM	Risk	Both
WFS1	DM	Risk	AD
YIPF5	DM	Risk	AR
ZBTB20	DM	Risk	AD
ZFP57	DM	Risk	AR
ZMPSTE24	DM	Risk	AR
ZNF808	DM	Risk	AR
G6PC2	DM	Protective	AD
MAP3K15	DM	Protective	XLD
COL21A1	HT	Risk	AD
COL4A4	HT	Risk	AD
CUL3	HT	Risk	AD
CYP11B1	HT	Risk	Both
CYP11B2	HT	Risk	AD
CYP17A1	HT	Risk	AR
FES	HT	Risk	AD
GUCY1A1	HT	Risk	AD
HSD11B2	HT	Risk	AR
KCNJ5	HT	Risk	AD
KLHL3	HT	Risk	Both
MTX2	HT	Risk	AR
NOS3	HT	Risk	AD
NPR1	HT	Risk	AD
NR3C1	HT	Risk	AD
NR3C2	HT	Risk	AD
PDE3A	HT	Risk	AD
PKD1	HT	Risk	AD
PKD2	HT	Risk	AD
SCNN1B	HT	Risk	Both
SCNN1G	HT	Risk	Both
TTC21B	HT	Risk	AR
UBR3	HT	Risk	AD
WNK1	HT	Risk	Both
WNK4	HT	Risk	AD
DBH	HT	Protective	AD
NHERF2	HT	Protective	AD
RGL3	HT	Protective	AD
ADCY3	OB	Risk	Both
ALMS1	OB	Risk	AR
APBA1	OB	Risk	AD
ARL6	OB	Risk	AR
ATP13A1	OB	Risk	AD
BBS1	OB	Risk	AR
BBS10	OB	Risk	AR
BBS12	OB	Risk	AR
BBS2	OB	Risk	AR
BBS4	OB	Risk	AR
BBS5	OB	Risk	AR
BBS7	OB	Risk	AR
BBS9	OB	Risk	AR
CALCR	OB	Risk	AD
CELA2A	OB	Risk	AD
CEP19	OB	Risk	AR
CPE	OB	Risk	AR
CREBBP	OB	Risk	AD
DIDO1	OB	Risk	AD
DYRK1B	OB	Risk	AD
GNAS	OB	Risk	AD
KIDINS220	OB	Risk	AD
LEP	OB	Risk	AR
LEPR	OB	Risk	AR
MC4R	OB	Risk	AD
MKKS	OB	Risk	AR
MKS1	OB	Risk	AR
MYT1L	OB	Risk	AD
NR0B2	OB	Risk	Both
NTRK2	OB	Risk	AD
PCSK1	OB	Risk	AR
PGM2L1	OB	Risk	AR
PHF6	OB	Risk	XLD
PHIP	OB	Risk	AD
POGZ	OB	Risk	AD
POMC	OB	Risk	AR
PTEN	OB	Risk	AD
PTOV1	OB	Risk	AD
PTPRG	OB	Risk	AD
RAI1	OB	Risk	AD
SDCCAG8	OB	Risk	AR
SIM1	OB	Risk	AD
SLC12A5	OB	Risk	AD
SLTM	OB	Risk	AD
TNK2	OB	Risk	AD
TTC8	OB	Risk	AR
UBR2	OB	Risk	AD
UBR3	OB	Risk	AD
VPS13B	OB	Risk	AR
GIPR	OB	Protective	AD
GPR151	OB	Protective	AD

## Sheet: S. Table 3
#Supplementary Table 3. List of all genome-wide significant associations.
sex	Gene	Mask	Max_AF	Chr	Pos	Trait	Cohort	Lambda	Direction	Cohort_direction	Effect	Pval	AAF	Num_Cases	Cases_Het	Cases_Alt	Num_Controls	Controls_Het	Controls_Alt	Model
F	DNAJC13	P+LP+VUS_H+D	0.01	3	132434568	Pure_hypercholesterolemia	AFR__AMR__CSA__EAS__EUR__OTH	1.02162	-	--+---	0.760344	5.29962e-08	0.00811746	32675	405.41	1	229128	3830.94	6	BT
B	KCNN4	P+LP+VUS_H+D	0.01	19	43767535	Pure_hypercholesterolemia	AFR__AMR__CSA__EAS__EUR__OTH	1.03117	+	+-+-++	1.37584	4.46567e-07	0.00194598	76319	365.45	0	406396	1513.26	0	BT
F	HRG	P+LP+VUS_H	0.001	3	186666043	Hyperlipidemia	AFR__EAS__EUR__OTH	0.958075	+	+?+++	5.25443	8.66272e-07	0.000278047	5660	14	0	251491	127	1	BT
B	UBE2Z	PVS1_VSS	0.001	17	48908505	Pure_hypercholesterolemia	EUR__OTH	0.973429	+	????+-	7.00021	1.23007e-06	3.45767e-05	72060	16	0	390697	16	0	BT
B	APOC3	PVS1_VSSMP	0.01	11	116830568	HDL	AFR__CSA__EAS__EUR__OTH	0.86135	+	+?+-++	0.323219	0	0.00254797	421119	2142	2				QT
B	APOC3	PVS1_VSSMP	0.01	11	116830568	Triglycerides	AFR__CSA__EAS__EUR__OTH	1.05552	-	-?-+--	-0.811098	0	0.00253719	459761	2329	2				QT
B	G0S2	P+LP+VUS_H	0.001	1	209675685	FAI	EUR	0.817638	+	????+?	222.25	0	7.08464e-06	352876	5	0				QT
B	G0S2	P+LP+VUS_H	0.01	1	209675685	FAI	EUR	0.864406	+	????+?	222.25	0	7.08464e-06	352876	5	0				QT
B	G0S2	PVS1_S	0.001	1	209675685	FAI	EUR	0.817638	+	????+?	222.25	0	7.08464e-06	352876	5	0				QT
B	G0S2	PVS1_S	0.01	1	209675685	FAI	EUR	0.864406	+	????+?	222.25	0	7.08464e-06	352876	5	0				QT
B	G0S2	PVS1_VSS	0.001	1	209675685	FAI	EUR	0.817638	+	????+?	222.25	0	7.08464e-06	352876	5	0				QT
B	G0S2	PVS1_VSS	0.01	1	209675685	FAI	EUR	0.864406	+	????+?	222.25	0	7.08464e-06	352876	5	0				QT
B	G0S2	PVS1_VSSM	0.001	1	209675685	FAI	EUR	0.817638	+	????+?	222.25	0	7.08464e-06	352876	5	0				QT
B	G0S2	PVS1_VSSM	0.01	1	209675685	FAI	EUR	0.864406	+	????+?	222.25	0	7.08464e-06	352876	5	0				QT
B	G0S2	PVS1_VSSMP	0.001	1	209675685	FAI	EUR__OTH	0.817638	+	????++	197.362	0	8.21943e-06	364989	6	0				QT
B	G0S2	PVS1_VSSMP	0.01	1	209675685	FAI	EUR__OTH	0.864406	+	????++	197.362	0	8.21943e-06	364989	6	0				QT
B	APOC3	PVS1_P	0.01	11	116830568	Triglycerides	AFR__CSA__EUR__OTH	1.05552	-	-?-?--	-0.817997	6.93193e-307	0.00221796	457628	2028	1				QT
B	APOC3	PVS1_P	0.01	11	116830568	HDL	AFR__CSA__EUR__OTH	0.86135	+	+?+?++	0.325911	2.34449e-295	0.00221029	419175	1851	1				QT
B	PIGL	PVS1_S	singleton	17	16217227	FAI	EUR__OTH	0.642733	+	????++	141.101	4.66659e-294	1.23291e-05	364989	9	0				QT
B	APOB	PVS1_VS	0.001	2	21001742	LDL	AFR__CSA__EAS__EUR__OTH	0.994287	-	-?----	-0.950737	1.04721e-290	0.00119326	459266	1096.05	0				QT
B	APOB	PVS1_VS	0.01	2	21001742	LDL	AFR__CSA__EAS__EUR__OTH	1.02789	-	-?----	-0.950737	1.04721e-290	0.00119326	459266	1096.05	0				QT
M	RRP1	PVS1_S	singleton	21	43789631	FAI	EUR__OTH	0.655588	+	????+-	246.549	8.39524e-277	1.35642e-05	184309	5	0				QT
B	LYN	PVS1_VS	singleton	8	55880105	FAI	EUR__OTH	0.642733	+	????+-	121.072	8.15568e-272	1.50689e-05	364989	11	0				QT
M	G0S2	P+LP+VUS_H+D	singleton	1	209675685	FAI	AFR__EUR__OTH	0.655588	+	+???+-	236.329	2.56872e-260	1.33552e-05	187193	5	0				QT
B	ABCA1	P+LP+VUS_H	0.001	9	104784318	HDL	AFR__AMR__CSA__EAS__EUR__OTH	0.810108	-	-+----	-0.339638	2.28351e-240	0.00164336	421626	1385.76	0				QT
B	ABCA1	P+LP+VUS_H	0.01	9	104784318	HDL	AFR__AMR__CSA__EAS__EUR__OTH	0.86135	-	-+----	-0.339638	2.28351e-240	0.00164336	421626	1385.76	0				QT
B	ABCA1	P+LP+VUS_H	0.001	9	104784318	Apolipoprotein_A	AFR__AMR__CSA__EAS__EUR__OTH	0.675979	-	------	-0.281753	9.4999e-239	0.00164633	419314	1380.66	0				QT
B	ABCA1	P+LP+VUS_H	0.01	9	104784318	Apolipoprotein_A	AFR__AMR__CSA__EAS__EUR__OTH	0.670867	-	------	-0.281753	9.4999e-239	0.00164633	419314	1380.66	0				QT
M	LYN	P+LP	singleton	8	55880105	FAI	EUR	0.655588	+	????+?	177.685	1.27128e-234	1.9644e-05	178171	7	0				QT
M	LYN	P+LP	0.001	8	55880105	FAI	EUR	0.79363	+	????+?	177.685	1.27128e-234	1.9644e-05	178171	7	0				QT
M	LYN	P+LP	0.01	8	55880105	FAI	EUR	0.845248	+	????+?	177.685	1.27128e-234	1.9644e-05	178171	7	0				QT
B	LYN	P+LP	singleton	8	55880105	FAI	EUR__OTH	0.642733	+	????+-	101.542	3.9193e-231	1.78088e-05	364989	13	0				QT
M	LYN	PVS1_VS	singleton	8	55880105	FAI	EUR	0.655588	+	????+?	175.971	3.72043e-230	1.9644e-05	178171	7	0				QT
M	LYN	PVS1_VS	0.001	8	55880105	FAI	EUR	0.79363	+	????+?	175.971	3.72043e-230	1.9644e-05	178171	7	0				QT
M	LYN	PVS1_VS	0.01	8	55880105	FAI	EUR	0.845248	+	????+?	175.971	3.72043e-230	1.9644e-05	178171	7	0				QT
M	LYN	PVS1_VSS	singleton	8	55880105	FAI	EUR	0.655588	+	????+?	175.971	3.72043e-230	1.9644e-05	178171	7	0				QT
M	LYN	PVS1_VSS	0.001	8	55880105	FAI	EUR	0.79363	+	????+?	175.971	3.72043e-230	1.9644e-05	178171	7	0				QT
M	LYN	PVS1_VSS	0.01	8	55880105	FAI	EUR	0.845248	+	????+?	175.971	3.72043e-230	1.9644e-05	178171	7	0				QT
M	LYN	PVS1_VSSM	singleton	8	55880105	FAI	EUR	0.655588	+	????+?	175.971	3.72043e-230	1.9644e-05	178171	7	0				QT
M	LYN	PVS1_VSSM	0.001	8	55880105	FAI	EUR	0.79363	+	????+?	175.971	3.72043e-230	1.9644e-05	178171	7	0				QT
M	LYN	PVS1_VSSM	0.01	8	55880105	FAI	EUR	0.845248	+	????+?	175.971	3.72043e-230	1.9644e-05	178171	7	0				QT
B	LYN	PVS1_VSS	singleton	8	55880105	FAI	EUR__OTH	0.642733	+	????+-	101.145	2.41721e-229	1.78088e-05	364989	13	0				QT
B	APOB	PVS1_VS	0.001	2	21001742	Cholesterol	AFR__CSA__EAS__EUR__OTH	0.97357	-	-?----	-1.10256	4.00141e-229	0.00119211	460129	1097.05	0				QT
B	APOB	PVS1_VS	0.01	2	21001742	Cholesterol	AFR__CSA__EAS__EUR__OTH	0.997683	-	-?----	-1.10256	4.00141e-229	0.00119211	460129	1097.05	0				QT
B	LYN	PVS1_VS	0.001	8	55880105	FAI	EUR__OTH	0.817638	+	????+-	100.956	1.6931e-228	1.78088e-05	364989	13	0				QT
B	LYN	PVS1_VS	0.01	8	55880105	FAI	EUR__OTH	0.864406	+	????+-	100.956	1.6931e-228	1.78088e-05	364989	13	0				QT
B	RRP1	PVS1_S	singleton	21	43789631	FAI	EUR__OTH	0.642733	+	????++	129.528	2.9828e-228	1.09592e-05	364989	8	0				QT
B	PCSK9	P+LP+VUS_H+D	0.01	1	55039838	LDL	AFR__AMR__CSA__EAS__EUR__OTH	1.02789	-	------	-0.442041	4.55292e-225	0.00423076	459814	3884.72	3				QT
B	PCSK9	P+LP+VUS_H+D	0.01	1	55039838	Apolipoprotein_B	AFR__AMR__CSA__EAS__EUR__OTH	1.03	-	------	-0.119576	1.61584e-215	0.00421268	458351	3855.77	3				QT
B	LYN	PVS1_VSSM	singleton	8	55880105	FAI	EUR__OTH	0.642733	+	????+-	93.6359	1.3949e-213	1.91787e-05	364989	14	0				QT
M	APOC3	PVS1_VSSMP	0.01	11	116830568	HDL	AFR__CSA__EUR__OTH	0.863301	+	+?+?++	0.325005	1.59962e-206	0.00261381	193970	1014	0				QT
M	LYN	PVS1_VSSMP	singleton	8	55880105	FAI	EUR	0.655588	+	????+?	154.627	2.41789e-203	2.24503e-05	178171	8	0				QT
M	LYN	PVS1_VSSMP	0.001	8	55880105	FAI	EUR	0.79363	+	????+?	154.627	2.41789e-203	2.24503e-05	178171	8	0				QT
M	LYN	PVS1_VSSMP	0.01	8	55880105	FAI	EUR	0.845248	+	????+?	154.627	2.41789e-203	2.24503e-05	178171	8	0				QT
M	GLRA1	PVS1_S	0.001	5	151822682	FAI	AFR__CSA__EUR	0.79363	+	-?+?+?	166.624	8.03334e-201	1.8882e-05	185362	7	0				QT
M	GLRA1	PVS1_S	0.01	5	151822682	FAI	AFR__CSA__EUR	0.845248	+	-?+?+?	166.624	8.03334e-201	1.8882e-05	185362	7	0				QT
B	LYN	PVS1_VSSMP	singleton	8	55880105	FAI	EUR__OTH	0.642733	+	????+-	87.2701	2.43906e-200	2.05486e-05	364989	15	0				QT
B	SHBG	P+LP+VUS_H+D	0.001	17	7630196	SHBG	AFR__AMR__CSA__EAS__EUR__OTH	0.91136	-	------	-23.7257	8.46608e-200	0.00128776	417780	1076	0				QT
B	SHBG	P+LP+VUS_H+D	0.01	17	7630196	SHBG	AFR__AMR__CSA__EAS__EUR__OTH	0.934308	-	------	-23.7257	8.46608e-200	0.00128776	417780	1076	0				QT
B	HBB	D	0.001	11	5225487	HbA1c	AFR__AMR__CSA__EAS__EUR__OTH	0.94188	-	--++--	-11.411	4.56259e-198	0.000470446	459465	432.31	0				QT
B	HBB	D	0.01	11	5225487	HbA1c	AFR__AMR__CSA__EAS__EUR__OTH	0.968316	-	--++--	-11.411	4.56259e-198	0.000470446	459465	432.31	0				QT
B	LYN	PVS1_VSS	0.001	8	55880105	FAI	EUR__OTH	0.817638	+	????+-	86.6348	1.82868e-197	2.05486e-05	364989	15	0				QT
B	LYN	PVS1_VSS	0.01	8	55880105	FAI	EUR__OTH	0.864406	+	????+-	86.6348	1.82868e-197	2.05486e-05	364989	15	0				QT
B	LYN	PVS1_VSSM	0.001	8	55880105	FAI	EUR__OTH	0.817638	+	????+-	81.0578	1.15858e-185	2.19185e-05	364989	16	0				QT
B	LYN	PVS1_VSSM	0.01	8	55880105	FAI	EUR__OTH	0.864406	+	????+-	81.0578	1.15858e-185	2.19185e-05	364989	16	0				QT
B	LPA	P+LP+VUS_H+D	0.01	6	160531735	Lipoprotein_A	AFR__AMR__CSA__EAS__EUR__OTH	0.947171	-	-+----	-11.5622	2.63305e-185	0.0212602	368510	15473.2	98				QT
B	SHBG	P+LP+VUS_H+D	0.01	17	7630196	FAI	AFR__AMR__CSA__EAS__EUR__OTH	0.864406	+	++++++	10.2009	4.16427e-184	0.00124915	380658	951	0				QT
B	SHBG	P+LP+VUS_H+D	0.001	17	7630196	FAI	AFR__CSA__EAS__EUR__OTH	0.817638	+	+?++++	10.2087	4.25686e-184	0.00124927	380223	950	0				QT
M	APOC3	PVS1_VSSMP	0.01	11	116830568	Triglycerides	AFR__CSA__EUR__OTH	1.01197	-	-?-?--	-0.996224	8.53553e-184	0.00259651	209897	1090	0				QT
B	SHBG	P+LP+VUS_H	0.001	17	7630196	SHBG	AFR__AMR__CSA__EAS__EUR__OTH	0.91136	-	------	-25.3119	2.60426e-183	0.00105797	417780	884	0				QT
B	SHBG	P+LP+VUS_H	0.01	17	7630196	SHBG	AFR__AMR__CSA__EAS__EUR__OTH	0.934308	-	------	-25.3119	2.60426e-183	0.00105797	417780	884	0				QT
B	ABCA1	P+LP+VUS_H+D	0.001	9	104784318	HDL	AFR__AMR__CSA__EAS__EUR__OTH	0.810108	-	------	-0.14847	2.88783e-181	0.00634973	421626	5340.42	7				QT
B	GLRA1	PVS1_S	0.001	5	151822682	FAI	AFR__CSA__EUR	0.817638	+	-?+?+?	80.6245	6.06707e-179	1.91091e-05	366318	14	0				QT
B	GLRA1	PVS1_S	0.01	5	151822682	FAI	AFR__CSA__EUR	0.864406	+	-?+?+?	80.6245	6.06707e-179	1.91091e-05	366318	14	0				QT
M	APOC3	PVS1_P	0.01	11	116830568	HDL	AFR__CSA__EUR__OTH	0.863301	+	-?+?++	0.322181	1.11938e-177	0.00228901	193970	888	0				QT
B	PCSK9	P+LP+VUS_H+D	0.001	1	55039838	LDL	AFR__CSA__EAS__EUR__OTH	0.994287	-	-?----	-0.487324	4.59207e-176	0.00272782	459266	2501.59	2				QT
B	PCSK9	P+LP+VUS_H+D	0.01	1	55039838	Cholesterol	AFR__AMR__CSA__EAS__EUR__OTH	0.997683	-	------	-0.510864	6.99331e-176	0.00423691	460677	3897.69	3				QT
B	LYN	PVS1_VSSMP	0.001	8	55880105	FAI	EUR__OTH	0.817638	+	????+-	76.2462	1.29014e-175	2.32884e-05	364989	17	0				QT
B	LYN	PVS1_VSSMP	0.01	8	55880105	FAI	EUR__OTH	0.864406	+	????+-	76.2462	1.29014e-175	2.32884e-05	364989	17	0				QT
B	LYN	P+LP	0.001	8	55880105	FAI	EUR__OTH	0.817638	+	????+-	76.1751	2.72243e-175	2.32884e-05	364989	17	0				QT
B	LYN	P+LP	0.01	8	55880105	FAI	EUR__OTH	0.864406	+	????+-	76.1751	2.72243e-175	2.32884e-05	364989	17	0				QT
B	SHBG	PVS1_VSSM	0.001	17	7630196	SHBG	AFR__CSA__EAS__EUR__OTH	0.91136	-	-?----	-25.5999	1.36185e-174	0.000990944	417279	827	0				QT
B	SHBG	PVS1_VSSM	0.01	17	7630196	SHBG	AFR__CSA__EAS__EUR__OTH	0.934308	-	-?----	-25.5999	1.36185e-174	0.000990944	417279	827	0				QT
B	SHBG	PVS1_VSSMP	0.001	17	7630196	SHBG	AFR__CSA__EAS__EUR__OTH	0.91136	-	-?----	-25.5999	1.36185e-174	0.000990944	417279	827	0				QT
B	SHBG	PVS1_VSSMP	0.01	17	7630196	SHBG	AFR__CSA__EAS__EUR__OTH	0.934308	-	-?----	-25.5999	1.36185e-174	0.000990944	417279	827	0				QT
B	ABCA1	P+LP	0.001	9	104784318	HDL	AFR__CSA__EAS__EUR__OTH	0.810108	-	-?----	-0.406286	4.76565e-174	0.000824146	421119	694.13	0				QT
B	ABCA1	P+LP	0.01	9	104784318	HDL	AFR__CSA__EAS__EUR__OTH	0.86135	-	-?----	-0.406286	4.76565e-174	0.000824146	421119	694.13	0				QT
B	SHBG	PVS1_VSS	0.001	17	7630196	SHBG	AFR__CSA__EAS__EUR__OTH	0.91136	-	-?----	-25.6313	9.65035e-174	0.000983754	417279	821	0				QT
B	SHBG	PVS1_VSS	0.01	17	7630196	SHBG	AFR__CSA__EAS__EUR__OTH	0.934308	-	-?----	-25.6313	9.65035e-174	0.000983754	417279	821	0				QT
B	ABCA1	P+LP	0.001	9	104784318	Apolipoprotein_A	AFR__CSA__EAS__EUR__OTH	0.675979	-	-?----	-0.336727	4.67429e-173	0.00082615	418810	692	0				QT
B	ABCA1	P+LP	0.01	9	104784318	Apolipoprotein_A	AFR__CSA__EAS__EUR__OTH	0.670867	-	-?----	-0.336727	4.67429e-173	0.00082615	418810	692	0				QT
B	PIGL	P+LP	singleton	17	16217227	FAI	CSA__EUR__OTH	0.642733	+	??+?+-	85.6854	6.69783e-173	1.88053e-05	372236	14	0				QT
B	ABCA1	P+LP+VUS_H+D	0.001	9	104784318	Apolipoprotein_A	AFR__AMR__CSA__EAS__EUR__OTH	0.675979	-	------	-0.120882	9.52672e-173	0.0063607	419314	5320.26	7				QT
F	APOC3	PVS1_VSSMP	0.01	11	116830568	Triglycerides	AFR__CSA__EAS__EUR__OTH	1.04889	-	-?----	-0.64599	1.19454e-170	0.00249409	249189	1239	2				QT
B	PCSK9	P+LP+VUS_H+D	0.001	1	55039838	Apolipoprotein_B	AFR__CSA__EAS__EUR__OTH	0.985693	-	-?----	-0.132426	6.70622e-170	0.00271363	457807	2480.64	2				QT
M	PIGL	P+LP	singleton	17	16217227	FAI	CSA__EUR	0.655588	+	??+?+?	143.702	1.09633e-167	2.19205e-05	182478	8	0				QT
B	PCSK9	PVS1_VSSMP	0.01	1	55039838	LDL	AFR__AMR__CSA__EAS__EUR__OTH	1.02789	-	------	-0.768727	2.93381e-166	0.00102891	459814	944.21	1				QT
B	PKD1	PVS1_VS	singleton	16	2089733	eGFR	AFR__CSA__EAS__EUR__OTH	0.867997	-	-?++--	-33.8593	3.96062e-166	0.000112036	459902	103.05	0				QT
B	DKK3	PVS1_S	singleton	11	11964474	FAI	CSA__EUR__OTH	0.642733	+	??-?+-	129.26	5.79835e-165	9.40264e-06	372236	7	0				QT
B	APOB	PVS1_VS	0.001	2	21001742	Apolipoprotein_B	AFR__CSA__EAS__EUR__OTH	0.985693	-	-?----	-0.225594	7.52303e-165	0.00090437	457807	828.05	0				QT
B	APOB	PVS1_VS	0.01	2	21001742	Apolipoprotein_B	AFR__CSA__EAS__EUR__OTH	1.03	-	-?----	-0.225594	7.52303e-165	0.00090437	457807	828.05	0				QT
B	PCSK9	PVS1_VSSM	0.01	1	55039838	LDL	AFR__AMR__CSA__EAS__EUR__OTH	1.02789	-	------	-0.767148	3.29638e-164	0.00102021	459814	936.21	1				QT
F	APOB	PVS1_VS	0.001	2	21001742	LDL	AFR__CSA__EAS__EUR__OTH	0.970828	-	-?----	-0.920128	8.00426e-164	0.00127897	248919	636.72	0				QT
F	APOB	PVS1_VS	0.01	2	21001742	LDL	AFR__CSA__EAS__EUR__OTH	0.979688	-	-?----	-0.920128	8.00426e-164	0.00127897	248919	636.72	0				QT
B	APOA5	PVS1_VSSM	0.001	11	116790137	Triglycerides	CSA__EAS__EUR__OTH	1.02602	+	??++++	1.15799	2.16732e-163	0.000594683	452342	538	0				QT
B	APOA5	PVS1_VSSM	0.01	11	116790137	Triglycerides	CSA__EAS__EUR__OTH	1.05552	+	??++++	1.15799	2.16732e-163	0.000594683	452342	538	0				QT
M	PIGL	PVS1_S	singleton	17	16217227	FAI	EUR__OTH	0.655588	+	????++	141.557	1.38586e-162	2.44155e-05	184309	9	0				QT
B	PCSK9	PVS1_VSSMP	0.001	1	55039838	LDL	AFR__CSA__EAS__EUR__OTH	0.994287	-	-?----	-0.788064	2.57012e-162	0.000960457	459266	880.21	1				QT
B	APOA5	P+LP+VUS_H	0.001	11	116790137	Triglycerides	CSA__EAS__EUR__OTH	1.02602	+	??++++	1.15904	4.76671e-162	0.000588051	452342	532	0				QT
B	APOA5	P+LP+VUS_H	0.01	11	116790137	Triglycerides	CSA__EAS__EUR__OTH	1.05552	+	??++++	1.15904	4.76671e-162	0.000588051	452342	532	0				QT
B	APOA5	PVS1_VSSMP	0.001	11	116790137	Triglycerides	CSA__EAS__EUR__OTH	1.02602	+	??++++	1.1478	4.78435e-162	0.00060021	452342	543	0				QT
B	APOA5	PVS1_VSSMP	0.01	11	116790137	Triglycerides	CSA__EAS__EUR__OTH	1.05552	+	??++++	1.1478	4.78435e-162	0.00060021	452342	543	0				QT
M	APOC3	PVS1_P	0.01	11	116830568	Triglycerides	AFR__CSA__EUR__OTH	1.01197	-	-?-?--	-0.994071	1.98291e-161	0.0022916	209897	962	0				QT
B	PCSK9	PVS1_VSSM	0.001	1	55039838	LDL	AFR__CSA__EAS__EUR__OTH	0.994287	-	-?----	-0.786542	2.98729e-160	0.000951748	459266	872.21	1				QT
B	FAHD2B	PVS1_VSSMP	singleton	2	97083761	FAI	AFR__EUR__OTH	0.642733	+	-???++	74.3505	1.14443e-159	2.15527e-05	371184	16	0				QT
B	PKD1	P+LP	singleton	16	2089733	eGFR	AFR__CSA__EUR__OTH	0.867997	-	-?-?--	-29.5197	2.13461e-159	0.000139864	457769	128.05	0				QT
B	APOC3	PVS1_VSSMP	0.01	11	116830568	Apolipoprotein_A	AFR__CSA__EAS__EUR__OTH	0.670867	+	+?+-++	0.186721	2.57939e-159	0.00248442	418810	2077	2				QT
B	ABCA1	P+LP+VUS_H+D	0.01	9	104784318	HDL	AFR__AMR__CSA__EAS__EUR__OTH	0.86135	-	------	-0.102167	2.48626e-157	0.0116466	421626	9787.05	17				QT
B	APOA5	PVS1_VSS	0.001	11	116790137	Triglycerides	CSA__EAS__EUR__OTH	1.02602	+	??++++	1.148	5.97322e-157	0.000580313	452342	525	0				QT
B	APOA5	PVS1_VSS	0.01	11	116790137	Triglycerides	CSA__EAS__EUR__OTH	1.05552	+	??++++	1.148	5.97322e-157	0.000580313	452342	525	0				QT
B	PKD1	PVS1_VSSM	singleton	16	2089733	eGFR	AFR__CSA__EAS__EUR__OTH	0.867997	-	-?-+--	-29.5322	5.88147e-154	0.000134867	459902	124.05	0				QT
B	PKD1	PVS1_VSSMP	singleton	16	2089733	eGFR	AFR__CSA__EAS__EUR__OTH	0.867997	-	-?-+--	-29.5322	5.88147e-154	0.000134867	459902	124.05	0				QT
B	HBB	P	0.001	11	5225487	HbA1c	AFR__AMR__CSA__EAS__EUR__OTH	0.94188	-	--++--	-7.75331	7.38406e-153	0.000664149	459465	610.31	0				QT
M	SHBG	P+LP+VUS_H+D	0.001	17	7630196	FAI	AFR__CSA__EUR__OTH	0.79363	+	+?+?++	17.1841	8.00068e-152	0.00132115	191500	506	0				QT
M	SHBG	P+LP+VUS_H+D	0.01	17	7630196	FAI	AFR__CSA__EUR__OTH	0.845248	+	+?+?++	17.1841	8.00068e-152	0.00132115	191500	506	0				QT
B	PCSK9	PVS1_VSSMP	0.01	1	55039838	Apolipoprotein_B	AFR__AMR__CSA__EAS__EUR__OTH	1.03	-	-+----	-0.205266	3.30239e-150	0.00100603	458351	920.23	1				QT
B	LDLR	P+LP+VUS_H+D	0.001	19	11089550	LDL	AFR__AMR__CSA__EAS__EUR__OTH	0.994287	+	++++++	0.510907	5.26589e-150	0.00213504	459814	1963.45	0				QT
B	LDLR	P+LP+VUS_H+D	0.01	19	11089550	LDL	AFR__AMR__CSA__EAS__EUR__OTH	1.02789	+	++++++	0.510907	5.26589e-150	0.00213504	459814	1963.45	0				QT
B	ABCA1	P+LP+VUS_H+D	0.01	9	104784318	Apolipoprotein_A	AFR__AMR__CSA__EAS__EUR__OTH	0.670867	-	------	-0.0827538	8.71697e-149	0.0116774	419314	9759	17				QT
B	PCSK9	PVS1_VSSM	0.01	1	55039838	Apolipoprotein_B	AFR__AMR__CSA__EAS__EUR__OTH	1.03	-	-+----	-0.204869	2.46335e-148	0.000997298	458351	912.23	1				QT
B	PCSK9	PVS1_VSSMP	0.001	1	55039838	Apolipoprotein_B	AFR__CSA__EAS__EUR__OTH	0.985693	-	-?----	-0.210874	4.79124e-148	0.000939506	457807	858.23	1				QT
F	APOC3	PVS1_P	0.01	11	116830568	Triglycerides	AFR__EUR__OTH	1.04889	-	-???--	-0.656846	7.39413e-148	0.00219129	243692	1066	1				QT
B	UBL4B	D	singleton	1	110112535	HbA1c	EUR	0.826782	+	????+?	59.2004	9.45041e-148	9.36553e-06	427098	8	0				QT
B	LDLR	P+LP+VUS_H	0.001	19	11089550	LDL	AFR__AMR__CSA__EAS__EUR__OTH	0.994287	+	++++++	0.520203	9.86964e-147	0.00201434	459814	1852.45	0				QT
B	LDLR	P+LP+VUS_H	0.01	19	11089550	LDL	AFR__AMR__CSA__EAS__EUR__OTH	1.02789	+	++++++	0.520203	9.86964e-147	0.00201434	459814	1852.45	0				QT
B	PKD1	PVS1_VSS	singleton	16	2089733	eGFR	AFR__CSA__EAS__EUR__OTH	0.867997	-	-?++--	-29.9873	1.81324e-146	0.000126169	459902	116.05	0				QT
B	PCSK9	PVS1_VSSM	0.001	1	55039838	Apolipoprotein_B	AFR__CSA__EAS__EUR__OTH	0.985693	-	-?----	-0.210502	3.7052e-146	0.000930769	457807	850.23	1				QT
F	APOC3	PVS1_VSSMP	0.01	11	116830568	HDL	AFR__CSA__EAS__EUR__OTH	0.812249	+	+?+-++	0.31932	5.00346e-145	0.00249853	226533	1128	2				QT
B	SHBG	PVS1_S	0.001	17	7630196	SHBG	EUR__OTH	0.91136	-	????--	-25.7335	1.69643e-144	0.000841228	400605	674	0				QT
B	SHBG	PVS1_S	0.01	17	7630196	SHBG	EUR__OTH	0.934308	-	????--	-25.7335	1.69643e-144	0.000841228	400605	674	0				QT
B	SHBG	P+LP+VUS_H	0.01	17	7630196	FAI	AFR__AMR__CSA__EAS__EUR__OTH	0.864406	+	+++-++	9.86666	3.08972e-143	0.00102323	380658	779	0				QT
B	SHBG	P+LP+VUS_H	0.001	17	7630196	FAI	AFR__CSA__EAS__EUR__OTH	0.817638	+	+?+-++	9.87551	3.19196e-143	0.00102308	380223	778	0				QT
B	SHBG	PVS1_VSSM	0.001	17	7630196	FAI	AFR__CSA__EAS__EUR__OTH	0.817638	+	-?++++	10.1744	8.82925e-143	0.000956018	380223	727	0				QT
B	SHBG	PVS1_VSSM	0.01	17	7630196	FAI	AFR__CSA__EAS__EUR__OTH	0.864406	+	-?++++	10.1744	8.82925e-143	0.000956018	380223	727	0				QT
B	SHBG	PVS1_VSSMP	0.001	17	7630196	FAI	AFR__CSA__EAS__EUR__OTH	0.817638	+	-?++++	10.1744	8.82925e-143	0.000956018	380223	727	0				QT
B	SHBG	PVS1_VSSMP	0.01	17	7630196	FAI	AFR__CSA__EAS__EUR__OTH	0.864406	+	-?++++	10.1744	8.82925e-143	0.000956018	380223	727	0				QT
B	HBB	P	0.01	11	5225487	HbA1c	AFR__AMR__CSA__EAS__EUR__OTH	0.968316	-	--++--	-7.25464	9.43061e-143	0.000753384	459465	692.31	0				QT
B	SHBG	PVS1_VSS	0.001	17	7630196	FAI	AFR__CSA__EAS__EUR__OTH	0.817638	+	-?+-++	10.2063	1.20247e-142	0.000949443	380223	722	0				QT
B	SHBG	PVS1_VSS	0.01	17	7630196	FAI	AFR__CSA__EAS__EUR__OTH	0.864406	+	-?+-++	10.2063	1.20247e-142	0.000949443	380223	722	0				QT
B	PIGL	PVS1_VSS	singleton	17	16217227	FAI	CSA__EUR__OTH	0.642733	+	??+?++	67.7338	2.59043e-142	2.55214e-05	372236	19	0				QT
B	LDLR	P+LP	0.001	19	11089550	LDL	AFR__AMR__CSA__EAS__EUR__OTH	0.994287	+	++++++	0.557057	4.72129e-141	0.00169241	459814	1556.39	0				QT
B	LDLR	P+LP	0.01	19	11089550	LDL	AFR__AMR__CSA__EAS__EUR__OTH	1.02789	+	++++++	0.557057	4.72129e-141	0.00169241	459814	1556.39	0				QT
B	LDLR	P	0.001	19	11089550	LDL	AFR__AMR__CSA__EAS__EUR__OTH	0.994287	+	++++++	0.655082	2.95382e-140	0.0012138	459814	1116.25	0				QT
B	LDLR	P	0.01	19	11089550	LDL	AFR__AMR__CSA__EAS__EUR__OTH	1.02789	+	++++++	0.655082	2.95382e-140	0.0012138	459814	1116.25	0				QT
B	PCSK9	PVS1_VSS	0.01	1	55039838	LDL	AFR__AMR__CSA__EAS__EUR__OTH	1.02789	-	------	-0.79312	1.42916e-138	0.000809252	459814	744.21	0				QT
B	PCSK9	P+LP+VUS_H+D	0.001	1	55039838	Cholesterol	AFR__CSA__EAS__EUR__OTH	0.97357	-	-?----	-0.564346	2.88051e-138	0.00273246	460129	2510.57	2				QT
B	LPA	D	0.01	6	160531735	Lipoprotein_A	AFR__AMR__CSA__EAS__EUR__OTH	0.947171	-	-+----	-10.9242	5.49087e-138	0.0175409	368510	12740	94				QT
B	APOC3	PVS1_P	0.01	11	116830568	Apolipoprotein_A	AFR__CSA__EUR__OTH	0.670867	+	+?+?++	0.18637	4.05226e-137	0.00215287	416885	1793	1				QT
M	APOB	PVS1_VS	0.001	2	21001742	LDL	AFR__CSA__EAS__EUR__OTH	0.972585	-	-?----	-0.990814	6.607e-136	0.00109343	210347	460	0				QT
M	APOB	PVS1_VS	0.01	2	21001742	LDL	AFR__CSA__EAS__EUR__OTH	0.994606	-	-?----	-0.990814	6.607e-136	0.00109343	210347	460	0				QT
B	PCSK9	PVS1_VSS	0.001	1	55039838	LDL	AFR__CSA__EAS__EUR__OTH	0.994287	-	-?----	-0.819756	7.77536e-135	0.000740541	459266	680.21	0				QT
F	ABCA1	P+LP+VUS_H	0.001	9	104784318	HDL	AFR__CSA__EAS__EUR__OTH	0.821987	-	-?----	-0.376991	3.55954e-133	0.00164683	226533	746.12	0				QT
F	ABCA1	P+LP+VUS_H	0.01	9	104784318	HDL	AFR__AMR__CSA__EAS__EUR__OTH	0.812249	-	-+----	-0.376226	5.25501e-133	0.00164664	226862	747.12	0				QT
M	CZIB	P+LP	0.01	1	53214662	Oestrodiol	AFR__EUR	0.831645	+	+?+?	298.557	2.2269e-132	0.000146585	17055	5	0				QT
M	CZIB	PVS1_VS	0.01	1	53214662	Oestrodiol	AFR__EUR	0.831645	+	+?+?	298.557	2.2269e-132	0.000146585	17055	5	0				QT
F	APOC3	PVS1_P	0.01	11	116830568	HDL	AFR__EUR__OTH	0.812249	+	+???++	0.327986	1.67773e-130	0.00217773	221561	963	1				QT
B	TTC38	PVS1_M	singleton	22	46268040	FAI	CSA__EUR__OTH	0.642733	+	??-?++	107.293	1.71735e-130	6.71617e-06	372236	5	0				QT
B	PCSK9	D	0.01	1	55039838	LDL	AFR__AMR__CSA__EAS__EUR__OTH	1.02789	-	------	-0.367696	4.6232e-129	0.0034679	459814	3183.18	3				QT
B	APOB	PVS1_VSS	0.001	2	21001742	LDL	AFR__CSA__EAS__EUR__OTH	0.994287	-	-?----	-0.656681	2.29633e-128	0.00125058	459266	1148.7	0				QT
B	APOB	PVS1_VSS	0.01	2	21001742	LDL	AFR__CSA__EAS__EUR__OTH	1.02789	-	-?----	-0.656681	2.29633e-128	0.00125058	459266	1148.7	0				QT
B	ABCA1	D	0.001	9	104784318	HDL	AFR__AMR__CSA__EAS__EUR__OTH	0.810108	-	------	-0.128559	3.83321e-128	0.00593857	421626	4993.71	7				QT
B	PCSK9	PVS1_VSS	0.01	1	55039838	Apolipoprotein_B	AFR__AMR__CSA__EAS__EUR__OTH	1.03	-	-+----	-0.212314	1.02198e-127	0.000792215	458351	726.23	0				QT
B	APOA5	P+LP+VUS_H+D	0.001	11	116790137	Triglycerides	AFR__CSA__EAS__EUR__OTH	1.02602	+	+?++++	0.893101	1.63398e-127	0.000764528	459761	703	0				QT
B	APOA5	P+LP+VUS_H+D	0.01	11	116790137	Triglycerides	AFR__CSA__EAS__EUR__OTH	1.05552	+	+?++++	0.893101	1.63398e-127	0.000764528	459761	703	0				QT
B	PCSK9	PVS1_VSSMP	0.01	1	55039838	Cholesterol	AFR__AMR__CSA__EAS__EUR__OTH	0.997683	-	------	-0.879784	4.25181e-127	0.00103023	460677	947.2	1				QT
F	APOB	PVS1_VS	0.001	2	21001742	Cholesterol	AFR__CSA__EAS__EUR__OTH	0.950335	-	-?----	-1.04683	2.60263e-126	0.00127887	249329	637.72	0				QT
F	APOB	PVS1_VS	0.01	2	21001742	Cholesterol	AFR__CSA__EAS__EUR__OTH	0.946953	-	-?----	-1.04683	2.60263e-126	0.00127887	249329	637.72	0				QT
B	PKD1	P+LP+VUS_H	singleton	16	2089733	eGFR	AFR__CSA__EAS__EUR__OTH	0.867997	-	-?-+--	-20.7533	3.45998e-126	0.000220755	459902	203.05	0				QT
B	PCSK9	PVS1_VSS	0.001	1	55039838	Apolipoprotein_B	AFR__CSA__EAS__EUR__OTH	0.985693	-	-?----	-0.21984	7.17277e-126	0.000725442	457807	664.23	0				QT
B	PCSK9	PVS1_VSSMP	0.001	1	55039838	Cholesterol	AFR__CSA__EAS__EUR__OTH	0.97357	-	-?----	-0.905519	3.69253e-125	0.000960821	460129	882.2	1				QT
B	PCSK9	PVS1_VSSM	0.01	1	55039838	Cholesterol	AFR__AMR__CSA__EAS__EUR__OTH	0.997683	-	------	-0.876348	4.50557e-125	0.00102154	460677	939.2	1				QT
B	PCSK9	D	0.01	1	55039838	Apolipoprotein_B	AFR__AMR__CSA__EAS__EUR__OTH	1.03	-	------	-0.0996859	1.64768e-124	0.00346262	458351	3168.19	3				QT
B	PIGL	PVS1_VSSM	singleton	17	16217227	FAI	CSA__EUR__OTH	0.642733	+	??+?++	57.9947	3.18105e-124	2.95511e-05	372236	22	0				QT
F	ABCA1	P+LP+VUS_H	0.01	9	104784318	Apolipoprotein_A	AFR__AMR__CSA__EAS__EUR__OTH	0.651155	-	------	-0.301133	3.42278e-124	0.00165482	224840	744.14	0				QT
F	ABCA1	P+LP+VUS_H	0.001	9	104784318	Apolipoprotein_A	AFR__CSA__EAS__EUR__OTH	0.661516	-	-?----	-0.301277	3.99179e-124	0.001655	224513	743.14	0				QT
B	PCSK9	P+LP+VUS_H	0.01	1	55039838	LDL	AFR__AMR__CSA__EAS__EUR__OTH	1.02789	-	------	-0.520321	3.57334e-123	0.00166975	459814	1535.55	0				QT
B	PCSK9	PVS1_VSSM	0.001	1	55039838	Cholesterol	AFR__CSA__EAS__EUR__OTH	0.97357	-	-?----	-0.90206	4.15623e-123	0.000952128	460129	874.2	1				QT
F	PCSK9	P+LP+VUS_H+D	0.01	1	55039838	LDL	AFR__AMR__CSA__EAS__EUR__OTH	0.979688	-	------	-0.428562	8.70201e-122	0.00429594	249283	2139.81	1				QT
B	PCSK9	P+LP+VUS_H	0.01	1	55039838	Apolipoprotein_B	AFR__AMR__CSA__EAS__EUR__OTH	1.03	-	-+----	-0.14246	6.61239e-121	0.00165985	458351	1521.59	0				QT
B	LDLR	P+LP+VUS_H+D	0.001	19	11089550	Apolipoprotein_B	AFR__AMR__CSA__EAS__EUR__OTH	0.985693	+	++++++	0.127888	1.02451e-120	0.00209062	458351	1916.48	0				QT
B	LDLR	P+LP+VUS_H+D	0.01	19	11089550	Apolipoprotein_B	AFR__AMR__CSA__EAS__EUR__OTH	1.03	+	++++++	0.127888	1.02451e-120	0.00209062	458351	1916.48	0				QT
B	LCAT	P+LP+VUS_H+D	0.001	16	67939916	HDL	AFR__CSA__EAS__EUR__OTH	0.810108	-	-?----	-0.332984	1.71168e-120	0.000864515	421119	728.13	0				QT
B	LCAT	P+LP+VUS_H+D	0.01	16	67939916	HDL	AFR__CSA__EAS__EUR__OTH	0.86135	-	-?----	-0.332984	1.71168e-120	0.000864515	421119	728.13	0				QT
B	ABCA1	D	0.001	9	104784318	Apolipoprotein_A	AFR__AMR__CSA__EAS__EUR__OTH	0.675979	-	------	-0.103577	1.34689e-119	0.00594876	419314	4974.79	7				QT
F	HBB	D	0.001	11	5225487	HbA1c	AFR__CSA__EAS__EUR__OTH	0.921872	-	-?-+--	-10.5205	3.51566e-119	0.000480288	248809	239	0				QT
F	HBB	D	0.01	11	5225487	HbA1c	AFR__CSA__EAS__EUR__OTH	0.924101	-	-?-+--	-10.5205	3.51566e-119	0.000480288	248809	239	0				QT
B	ABCA1	D	0.01	9	104784318	HDL	AFR__AMR__CSA__EAS__EUR__OTH	0.86135	-	------	-0.0899043	1.78893e-118	0.0112497	421626	9452.35	17				QT
B	PCSK9	P+LP	0.01	1	55039838	LDL	AFR__AMR__CSA__EAS__EUR__OTH	1.02789	-	------	-0.721979	3.6339e-118	0.000824423	459814	758.16	0				QT
B	PCSK9	P+LP+VUS_H	0.001	1	55039838	LDL	AFR__CSA__EAS__EUR__OTH	0.994287	-	-?----	-0.52076	4.3364e-118	0.00160207	459266	1471.55	0				QT
B	SHBG	PVS1_S	0.001	17	7630196	FAI	EUR__OTH	0.817638	+	????++	10.1824	4.92143e-118	0.000810983	364989	592	0				QT
B	SHBG	PVS1_S	0.01	17	7630196	FAI	EUR__OTH	0.864406	+	????++	10.1824	4.92143e-118	0.000810983	364989	592	0				QT
M	UBL4B	D	singleton	1	110112535	HbA1c	EUR__OTH	0.85299	+	????+-	61.3269	8.7406e-118	1.97889e-05	202134	8	0				QT
M	SHBG	PVS1_VSSM	0.001	17	7630196	FAI	CSA__EUR__OTH	0.79363	+	??+?++	17.2267	9.25649e-118	0.00101794	188616	384	0				QT
M	SHBG	PVS1_VSSM	0.01	17	7630196	FAI	CSA__EUR__OTH	0.845248	+	??+?++	17.2267	9.25649e-118	0.00101794	188616	384	0				QT
M	SHBG	PVS1_VSSMP	0.001	17	7630196	FAI	CSA__EUR__OTH	0.79363	+	??+?++	17.2267	9.25649e-118	0.00101794	188616	384	0				QT
M	SHBG	PVS1_VSSMP	0.01	17	7630196	FAI	CSA__EUR__OTH	0.845248	+	??+?++	17.2267	9.25649e-118	0.00101794	188616	384	0				QT
B	APOB	PVS1_VSSM	0.001	2	21001742	LDL	AFR__CSA__EAS__EUR__OTH	0.994287	-	-?----	-0.587378	9.3716e-118	0.00141497	459266	1299.7	0				QT
B	APOB	PVS1_VSSM	0.01	2	21001742	LDL	AFR__CSA__EAS__EUR__OTH	1.02789	-	-?----	-0.587378	9.3716e-118	0.00141497	459266	1299.7	0				QT
B	APOB	PVS1_VSSMP	0.001	2	21001742	LDL	AFR__CSA__EAS__EUR__OTH	0.994287	-	-?----	-0.587378	9.3716e-118	0.00141497	459266	1299.7	0				QT
B	APOB	PVS1_VSSMP	0.01	2	21001742	LDL	AFR__CSA__EAS__EUR__OTH	1.02789	-	-?----	-0.587378	9.3716e-118	0.00141497	459266	1299.7	0				QT
M	APOC3	PVS1_VSSMP	0.01	11	116830568	Apolipoprotein_A	AFR__CSA__EUR__OTH	0.712529	+	+?+?++	0.205257	1.05213e-117	0.00258671	193682	1002	0				QT
M	SHBG	P+LP+VUS_H	0.001	17	7630196	FAI	AFR__CSA__EUR__OTH	0.79363	+	+?+?++	16.6705	1.14318e-117	0.00107311	191500	411	0				QT
M	SHBG	P+LP+VUS_H	0.01	17	7630196	FAI	AFR__CSA__EUR__OTH	0.845248	+	+?+?++	16.6705	1.14318e-117	0.00107311	191500	411	0				QT
M	SHBG	PVS1_VSS	0.001	17	7630196	FAI	CSA__EUR__OTH	0.79363	+	??+?++	17.2229	2.11313e-117	0.00101529	188616	383	0				QT
M	SHBG	PVS1_VSS	0.01	17	7630196	FAI	CSA__EUR__OTH	0.845248	+	??+?++	17.2229	2.11313e-117	0.00101529	188616	383	0				QT
B	PCSK9	P+LP+VUS_H	0.001	1	55039838	Apolipoprotein_B	AFR__CSA__EAS__EUR__OTH	0.985693	-	-?----	-0.143167	2.78237e-117	0.00159411	457807	1459.59	0				QT
B	LDLR	P+LP+VUS_H	0.001	19	11089550	Apolipoprotein_B	AFR__AMR__CSA__EAS__EUR__OTH	0.985693	+	++++++	0.12971	5.42011e-117	0.00196954	458351	1805.48	0				QT
B	LDLR	P+LP+VUS_H	0.01	19	11089550	Apolipoprotein_B	AFR__AMR__CSA__EAS__EUR__OTH	1.03	+	++++++	0.12971	5.42011e-117	0.00196954	458351	1805.48	0				QT
B	PIGL	PVS1_VSSMP	singleton	17	16217227	FAI	CSA__EUR__OTH	0.642733	+	??+?++	53.4713	7.20977e-117	3.22376e-05	372236	24	0				QT
M	SHBG	P+LP+VUS_H+D	0.001	17	7630196	SHBG	AFR__CSA__EUR__OTH	0.919384	-	-?-?--	-16.8031	1.18592e-116	0.00132398	192601	510	0				QT
M	SHBG	P+LP+VUS_H+D	0.01	17	7630196	SHBG	AFR__CSA__EUR__OTH	0.938921	-	-?-?--	-16.8031	1.18592e-116	0.00132398	192601	510	0				QT
M	ABCA1	P+LP+VUS_H	0.001	9	104784318	Apolipoprotein_A	AFR__CSA__EAS__EUR__OTH	0.699283	-	-?-+--	-0.256166	4.13207e-116	0.00164272	194297	638.35	0				QT
M	ABCA1	P+LP+VUS_H	0.01	9	104784318	Apolipoprotein_A	AFR__CSA__EAS__EUR__OTH	0.712529	-	-?-+--	-0.256166	4.13207e-116	0.00164272	194297	638.35	0				QT
B	GAS2L3	PVS1_M	0.001	12	100594872	FAI	EAS__EUR	0.817638	+	???++?	42.3434	4.87969e-116	4.65224e-05	354668	33	0				QT
B	GAS2L3	PVS1_M	0.01	12	100594872	FAI	EAS__EUR	0.864406	+	???++?	42.3434	4.87969e-116	4.65224e-05	354668	33	0				QT
M	FAHD2B	PVS1_VSSMP	singleton	2	97083761	FAI	AFR__CSA__EUR__OTH	0.655588	+	+?-?++	96.8787	9.08574e-116	3.39431e-05	191497	13	0				QT
B	APOA5	P+LP	0.001	11	116790137	Triglycerides	EUR	1.02602	+	????+?	1.12727	3.28154e-115	0.000465241	426661	397	0				QT
B	APOA5	P+LP	0.01	11	116790137	Triglycerides	EUR	1.05552	+	????+?	1.12727	3.28154e-115	0.000465241	426661	397	0				QT
B	LDLR	D	0.001	19	11089550	LDL	AFR__AMR__CSA__EAS__EUR__OTH	0.994287	+	++++++	0.504443	9.58116e-115	0.00166274	459814	1529.1	0				QT
B	LDLR	D	0.01	19	11089550	LDL	AFR__AMR__CSA__EAS__EUR__OTH	1.02789	+	++++++	0.504443	9.58116e-115	0.00166274	459814	1529.1	0				QT
B	PCSK9	P+LP	0.001	1	55039838	LDL	AFR__CSA__EAS__EUR__OTH	0.994287	-	-?----	-0.741609	7.32268e-114	0.00075573	459266	694.16	0				QT
F	LPA	P+LP+VUS_H+D	0.01	6	160531735	Lipoprotein_A	AFR__AMR__CSA__EAS__EUR__OTH	0.914732	-	------	-12.0874	4.80818e-113	0.0217504	200342	8617.04	49				QT
B	TOMM5	PVS1_VSSM	0.001	9	37588907	FAI	EUR	0.817638	+	????+?	90.988	6.08399e-113	9.9185e-06	352876	7	0				QT
B	TOMM5	PVS1_VSSM	0.01	9	37588907	FAI	EUR	0.864406	+	????+?	90.988	6.08399e-113	9.9185e-06	352876	7	0				QT
B	TOMM5	PVS1_VSSMP	0.001	9	37588907	FAI	EUR	0.817638	+	????+?	90.988	6.08399e-113	9.9185e-06	352876	7	0				QT
B	TOMM5	PVS1_VSSMP	0.01	9	37588907	FAI	EUR	0.864406	+	????+?	90.988	6.08399e-113	9.9185e-06	352876	7	0				QT
F	SHBG	P+LP+VUS_H+D	0.01	17	7630196	SHBG	AFR__AMR__CSA__EAS__EUR__OTH	0.932463	-	------	-29.8045	7.38001e-113	0.00126119	224391	566	0				QT
F	SHBG	P+LP+VUS_H+D	0.001	17	7630196	SHBG	AFR__CSA__EAS__EUR__OTH	0.90362	-	-?----	-29.8867	8.76734e-113	0.00126078	224067	565	0				QT
F	APOB	PVS1_VS	0.001	2	21001742	Apolipoprotein_B	AFR__CSA__EAS__EUR__OTH	0.986638	-	-?----	-0.234683	2.09679e-112	0.0010056	248468	499.72	0				QT
F	APOB	PVS1_VS	0.01	2	21001742	Apolipoprotein_B	AFR__CSA__EAS__EUR__OTH	0.97542	-	-?----	-0.234683	2.09679e-112	0.0010056	248468	499.72	0				QT
F	PCSK9	P+LP+VUS_H+D	0.01	1	55039838	Apolipoprotein_B	AFR__AMR__CSA__EAS__EUR__OTH	0.97542	-	------	-0.113229	2.09938e-112	0.00426963	248830	2122.82	1				QT
B	APOA5	PVS1_S	0.001	11	116790137	Triglycerides	CSA__EAS__EUR__OTH	1.02602	+	??++++	1.08329	8.1436e-112	0.00046204	452342	418	0				QT
B	APOA5	PVS1_S	0.01	11	116790137	Triglycerides	CSA__EAS__EUR__OTH	1.05552	+	??++++	1.08329	8.1436e-112	0.00046204	452342	418	0				QT
F	LDLR	P+LP+VUS_H+D	0.001	19	11089550	LDL	AFR__AMR__CSA__EAS__EUR__OTH	0.970828	+	++++++	0.574523	1.6847e-111	0.00223997	249283	1116.77	0				QT
F	LDLR	P+LP+VUS_H+D	0.01	19	11089550	LDL	AFR__AMR__CSA__EAS__EUR__OTH	0.979688	+	++++++	0.573197	2.25465e-111	0.00224198	249283	1117.77	0				QT
F	LDLR	P	0.001	19	11089550	LDL	AFR__AMR__CSA__EAS__EUR__OTH	0.970828	+	++++++	0.7513	4.01511e-111	0.00130361	249283	649.93	0				QT
F	LDLR	P	0.01	19	11089550	LDL	AFR__AMR__CSA__EAS__EUR__OTH	0.979688	+	++++++	0.748398	6.41157e-111	0.00130561	249283	650.93	0				QT
F	LDLR	P+LP+VUS_H	0.001	19	11089550	LDL	AFR__AMR__CSA__EAS__EUR__OTH	0.970828	+	++++++	0.588164	1.37851e-110	0.00211962	249283	1056.77	0				QT
F	LDLR	P+LP+VUS_H	0.01	19	11089550	LDL	AFR__AMR__CSA__EAS__EUR__OTH	0.979688	+	++++++	0.586732	1.86689e-110	0.00212163	249283	1057.77	0				QT
F	LDLR	P+LP	0.001	19	11089550	LDL	AFR__AMR__CSA__EAS__EUR__OTH	0.970828	+	++++++	0.640891	2.76595e-110	0.00178195	249283	888.42	0				QT
B	ABCA1	PVS1_VSSMP	0.001	9	104784318	Apolipoprotein_A	AFR__CSA__EAS__EUR__OTH	0.675979	-	-?----	-0.371925	2.81496e-110	0.000428595	418810	359	0				QT
B	ABCA1	PVS1_VSSMP	0.01	9	104784318	Apolipoprotein_A	AFR__CSA__EAS__EUR__OTH	0.670867	-	-?----	-0.371925	2.81496e-110	0.000428595	418810	359	0				QT
B	ABCA1	D	0.01	9	104784318	Apolipoprotein_A	AFR__AMR__CSA__EAS__EUR__OTH	0.670867	-	------	-0.0721989	3.51489e-110	0.0112798	419314	9425.53	17				QT
F	LDLR	P+LP	0.01	19	11089550	LDL	AFR__AMR__CSA__EAS__EUR__OTH	0.979688	+	++++++	0.639051	3.93271e-110	0.00178395	249283	889.42	0				QT
B	LDLR	P+LP+VUS_H+D	0.001	19	11089550	Cholesterol	AFR__AMR__CSA__EAS__EUR__OTH	0.97357	+	++++++	0.570075	4.02468e-110	0.00213428	460677	1966.43	0				QT
B	LDLR	P+LP+VUS_H+D	0.01	19	11089550	Cholesterol	AFR__AMR__CSA__EAS__EUR__OTH	0.997683	+	++++++	0.570075	4.02468e-110	0.00213428	460677	1966.43	0				QT
M	PCSK9	P+LP+VUS_H+D	0.01	1	55039838	LDL	AFR__AMR__CSA__EAS__EUR__OTH	0.994606	-	-+----	-0.454195	4.97167e-110	0.00416304	210531	1748.9	2				QT
M	APOB	PVS1_VS	0.001	2	21001742	Cholesterol	AFR__CSA__EAS__EUR__OTH	0.949009	-	-?----	-1.17196	5.58277e-110	0.00109108	210800	460	0				QT
M	APOB	PVS1_VS	0.01	2	21001742	Cholesterol	AFR__CSA__EAS__EUR__OTH	0.993414	-	-?----	-1.17196	5.58277e-110	0.00109108	210800	460	0				QT
B	PCSK9	P+LP	0.01	1	55039838	Apolipoprotein_B	AFR__AMR__CSA__EAS__EUR__OTH	1.03	-	-+----	-0.193851	5.99236e-110	0.000811795	458351	744.17	0				QT
B	HBB	P+LP	0.001	11	5225487	HbA1c	AFR__AMR__CSA__EAS__EUR__OTH	0.94188	-	--++--	-4.81824	8.98014e-110	0.000967009	459465	886.61	1				QT
B	ABCA1	PVS1_VSSM	0.001	9	104784318	Apolipoprotein_A	AFR__CSA__EAS__EUR__OTH	0.675979	-	-?----	-0.372577	9.4604e-110	0.000425014	418810	356	0				QT
B	ABCA1	PVS1_VSSM	0.01	9	104784318	Apolipoprotein_A	AFR__CSA__EAS__EUR__OTH	0.670867	-	-?----	-0.372577	9.4604e-110	0.000425014	418810	356	0				QT
M	GAS2L3	PVS1_M	0.001	12	100594872	FAI	EUR	0.79363	+	????+?	73.2425	2.82334e-109	5.33196e-05	178171	19	0				QT
M	GAS2L3	PVS1_M	0.01	12	100594872	FAI	EUR	0.845248	+	????+?	73.2425	2.82334e-109	5.33196e-05	178171	19	0				QT
M	PIGL	PVS1_VSS	singleton	17	16217227	FAI	CSA__EUR__OTH	0.655588	+	??+?++	90.7651	5.99941e-109	3.71124e-05	188616	14	0				QT
B	LDLR	P+LP	0.001	19	11089550	Apolipoprotein_B	AFR__AMR__CSA__EAS__EUR__OTH	0.985693	+	++++++	0.136774	6.92586e-109	0.00164984	458351	1512.42	0				QT
B	LDLR	P+LP	0.01	19	11089550	Apolipoprotein_B	AFR__AMR__CSA__EAS__EUR__OTH	1.03	+	++++++	0.136774	6.92586e-109	0.00164984	458351	1512.42	0				QT
B	ABCA1	PVS1_VSS	0.001	9	104784318	Apolipoprotein_A	AFR__CSA__EAS__EUR__OTH	0.675979	-	-?----	-0.37437	2.32715e-108	0.000415463	418810	348	0				QT
B	ABCA1	PVS1_VSS	0.01	9	104784318	Apolipoprotein_A	AFR__CSA__EAS__EUR__OTH	0.670867	-	-?----	-0.37437	2.32715e-108	0.000415463	418810	348	0				QT
M	PCSK9	P+LP+VUS_H+D	0.01	1	55039838	Apolipoprotein_B	AFR__AMR__CSA__EAS__EUR__OTH	0.984477	-	-+----	-0.125982	4.11996e-108	0.00415452	209521	1736.92	2				QT
B	LCAT	D	0.001	16	67939916	HDL	AFR__CSA__EUR__OTH	0.810108	-	-?-?--	-0.332557	5.11505e-108	0.000776525	419175	651	0				QT
B	LCAT	D	0.01	16	67939916	HDL	AFR__CSA__EUR__OTH	0.86135	-	-?-?--	-0.332557	5.11505e-108	0.000776525	419175	651	0				QT
M	ABCA1	P+LP+VUS_H	0.001	9	104784318	HDL	AFR__CSA__EAS__EUR__OTH	0.840479	-	-?----	-0.293926	1.36571e-107	0.00164693	194586	640.94	0				QT
M	ABCA1	P+LP+VUS_H	0.01	9	104784318	HDL	AFR__CSA__EAS__EUR__OTH	0.863301	-	-?----	-0.293926	1.36571e-107	0.00164693	194586	640.94	0				QT
B	PCSK9	P+LP	0.001	1	55039838	Apolipoprotein_B	AFR__CSA__EAS__EUR__OTH	0.985693	-	-?----	-0.199704	1.81957e-107	0.000745046	457807	682.17	0				QT
B	LDLR	P+LP+VUS_H	0.001	19	11089550	Cholesterol	AFR__AMR__CSA__EAS__EUR__OTH	0.97357	+	++++++	0.579672	1.96723e-107	0.00201381	460677	1855.43	0				QT
B	LDLR	P+LP+VUS_H	0.01	19	11089550	Cholesterol	AFR__AMR__CSA__EAS__EUR__OTH	0.997683	+	++++++	0.579672	1.96723e-107	0.00201381	460677	1855.43	0				QT
B	G6PD	P	0.01	23	154532012	HbA1c	AFR__AMR__CSA__EAS__EUR__OTH	0.968316	-	------	-3.49422	5.11672e-107	0.00350646	459465	1414.61	903.79				QT
B	PCSK9	PVS1_VSS	0.01	1	55039838	Cholesterol	AFR__AMR__CSA__EAS__EUR__OTH	0.997683	-	------	-0.90949	6.14633e-107	0.000810984	460677	747.2	0				QT
B	LDLR	P	0.001	19	11089550	Apolipoprotein_B	AFR__AMR__CSA__EAS__EUR__OTH	0.985693	+	++++++	0.160184	8.23759e-107	0.00117624	458351	1078.26	0				QT
B	LDLR	P	0.01	19	11089550	Apolipoprotein_B	AFR__AMR__CSA__EAS__EUR__OTH	1.03	+	++++++	0.160184	8.23759e-107	0.00117624	458351	1078.26	0				QT
B	HBB	P+LP+VUS_H	0.001	11	5225487	HbA1c	AFR__AMR__CSA__EAS__EUR__OTH	0.94188	-	--++--	-4.58977	2.07578e-106	0.000994214	459465	911.61	1				QT
B	ABCA1	PVS1_VSSMP	0.001	9	104784318	HDL	AFR__CSA__EAS__EUR__OTH	0.810108	-	-?----	-0.438751	2.83147e-106	0.000428771	421119	361.13	0				QT
B	ABCA1	PVS1_VSSMP	0.01	9	104784318	HDL	AFR__CSA__EAS__EUR__OTH	0.86135	-	-?----	-0.438751	2.83147e-106	0.000428771	421119	361.13	0				QT
F	SHBG	P+LP+VUS_H	0.01	17	7630196	SHBG	AFR__AMR__CSA__EAS__EUR__OTH	0.932463	-	------	-31.8572	7.0982e-106	0.00104728	224391	470	0				QT
F	SHBG	P+LP+VUS_H	0.001	17	7630196	SHBG	AFR__CSA__EAS__EUR__OTH	0.90362	-	-?----	-31.969	8.29225e-106	0.00104656	224067	469	0				QT
B	G6PD	P+LP+VUS_H+D	0.01	23	154532012	HbA1c	AFR__AMR__CSA__EAS__EUR__OTH	0.968316	-	------	-1.60806	9.99698e-106	0.00712819	459465	3016.89	1766.71				QT
B	ABCA1	PVS1_VSSM	0.001	9	104784318	HDL	AFR__CSA__EAS__EUR__OTH	0.810108	-	-?----	-0.439308	1.13437e-105	0.000425209	421119	358.13	0				QT
B	ABCA1	PVS1_VSSM	0.01	9	104784318	HDL	AFR__CSA__EAS__EUR__OTH	0.86135	-	-?----	-0.439308	1.13437e-105	0.000425209	421119	358.13	0				QT
B	G6PD	P+LP+VUS_H	0.01	23	154532012	HbA1c	AFR__AMR__CSA__EAS__EUR__OTH	0.968316	-	------	-1.60612	1.94826e-105	0.00711731	459465	3012.89	1763.71				QT
B	ABCA1	PVS1_VS	0.001	9	104784318	Apolipoprotein_A	AFR__CSA__EUR__OTH	0.675979	-	-?-?--	-0.406226	2.89266e-105	0.00034422	416885	287	0				QT
B	ABCA1	PVS1_VS	0.01	9	104784318	Apolipoprotein_A	AFR__CSA__EUR__OTH	0.670867	-	-?-?--	-0.406226	2.89266e-105	0.00034422	416885	287	0				QT
B	G6PD	P+LP	0.01	23	154532012	HbA1c	AFR__AMR__CSA__EAS__EUR__OTH	0.968316	-	------	-1.61593	2.95193e-105	0.00703755	459465	2989.89	1738.56				QT
B	HBB	P+LP	0.01	11	5225487	HbA1c	AFR__AMR__CSA__EAS__EUR__OTH	0.968316	-	--++--	-4.64657	3.07163e-105	0.00105624	459465	968.61	1				QT
B	PCSK9	PVS1_VSS	0.001	1	55039838	Cholesterol	AFR__CSA__EAS__EUR__OTH	0.97357	-	-?----	-0.94405	3.16573e-105	0.000741318	460129	682.2	0				QT
B	HBB	P+LP+VUS_H+D	0.001	11	5225487	HbA1c	AFR__AMR__CSA__EAS__EUR__OTH	0.94188	-	--++--	-4.3724	1.45475e-104	0.00103665	459465	950.61	1				QT
B	ABCA1	PVS1_VSS	0.001	9	104784318	HDL	AFR__CSA__EAS__EUR__OTH	0.810108	-	-?----	-0.441508	2.19106e-104	0.00041571	421119	350.13	0				QT
B	ABCA1	PVS1_VSS	0.01	9	104784318	HDL	AFR__CSA__EAS__EUR__OTH	0.86135	-	-?----	-0.441508	2.19106e-104	0.00041571	421119	350.13	0				QT
F	ABCA1	P+LP	0.001	9	104784318	HDL	AFR__CSA__EAS__EUR__OTH	0.821987	-	-?----	-0.467834	3.961e-104	0.000827694	226533	375	0				QT
F	ABCA1	P+LP	0.01	9	104784318	HDL	AFR__CSA__EAS__EUR__OTH	0.812249	-	-?----	-0.467834	3.961e-104	0.000827694	226533	375	0				QT
M	APOC3	PVS1_P	0.01	11	116830568	Apolipoprotein_A	AFR__CSA__EUR__OTH	0.712529	+	-?+?++	0.204944	5.73057e-103	0.0022666	193682	878	0				QT
B	LPL	P+LP+VUS_H	0.001	8	19939442	Triglycerides	AFR__CSA__EAS__EUR__OTH	1.02602	+	+?++++	0.598704	6.3201e-103	0.00134097	459761	1233.05	0				QT
B	LPL	P+LP+VUS_H	0.01	8	19939442	Triglycerides	AFR__CSA__EAS__EUR__OTH	1.05552	+	+?++++	0.598704	6.3201e-103	0.00134097	459761	1233.05	0				QT
F	APOA5	P+LP+VUS_H	0.001	11	116790137	Triglycerides	CSA__EAS__EUR__OTH	0.97581	+	??-+++	1.03275	7.0718e-103	0.000616573	244902	302	0				QT
F	APOA5	P+LP+VUS_H	0.01	11	116790137	Triglycerides	CSA__EAS__EUR__OTH	1.04889	+	??-+++	1.03275	7.0718e-103	0.000616573	244902	302	0				QT
F	APOA5	PVS1_VSSM	0.001	11	116790137	Triglycerides	CSA__EAS__EUR__OTH	0.97581	+	??-+++	1.02797	2.80831e-102	0.000618615	244902	303	0				QT
F	APOA5	PVS1_VSSM	0.01	11	116790137	Triglycerides	CSA__EAS__EUR__OTH	1.04889	+	??-+++	1.02797	2.80831e-102	0.000618615	244902	303	0				QT
B	LIPC	P+LP+VUS_H+D	0.01	15	58432041	HDL	AFR__AMR__CSA__EAS__EUR__OTH	0.86135	+	+-++++	0.108935	3.34364e-102	0.00663711	421626	5574.76	11				QT
B	HBB	P+LP+VUS_H	0.01	11	5225487	HbA1c	AFR__AMR__CSA__EAS__EUR__OTH	0.968316	-	--++--	-4.43632	3.42721e-102	0.00108345	459465	993.61	1				QT
B	LDLR	P	0.001	19	11089550	Cholesterol	AFR__AMR__CSA__EAS__EUR__OTH	0.97357	+	++++++	0.727704	3.50787e-102	0.00121369	460677	1118.24	0				QT
B	LDLR	P	0.01	19	11089550	Cholesterol	AFR__AMR__CSA__EAS__EUR__OTH	0.997683	+	++++++	0.727704	3.50787e-102	0.00121369	460677	1118.24	0				QT
B	GALNS	PVS1_P	0.001	16	88814441	FAI	AFR__EUR	0.817638	+	-???+?	74.0236	3.52917e-102	1.25324e-05	359070	9	0				QT
B	GALNS	PVS1_P	0.01	16	88814441	FAI	AFR__EUR	0.864406	+	-???+?	74.0236	3.52917e-102	1.25324e-05	359070	9	0				QT
B	PKD1	P+LP+VUS_H	0.001	16	2089733	End_stage_renal_disease_CDK_stage_5	AFR__CSA__EUR__OTH	0.928649	+	++++	117.408	5.99318e-102	0.0012795	1706	101	0	478191	1123.06	2	BT
B	PKD1	P+LP+VUS_H	0.01	16	2089733	End_stage_renal_disease_CDK_stage_5	AFR__CSA__EUR__OTH	0.961236	+	++++	117.408	5.99318e-102	0.0012795	1706	101	0	478191	1123.06	2	BT
B	PCSK9	D	0.01	1	55039838	Cholesterol	AFR__AMR__CSA__EAS__EUR__OTH	0.997683	-	------	-0.426896	6.49065e-102	0.00347225	460677	3193.17	3				QT
B	ABCA1	PVS1_VS	0.001	9	104784318	HDL	AFR__CSA__EUR__OTH	0.810108	-	-?-?--	-0.480059	8.75194e-102	0.000344876	419175	289.13	0				QT
B	ABCA1	PVS1_VS	0.01	9	104784318	HDL	AFR__CSA__EUR__OTH	0.86135	-	-?-?--	-0.480059	8.75194e-102	0.000344876	419175	289.13	0				QT
B	RNF128	D	0.01	23	106726914	eGFR	AFR__AMR__CSA__EAS__EUR__OTH	0.940088	-	+++---	-2.33339	1.08095e-101	0.00950266	460450	4565	2093				QT
M	SHBG	P+LP+VUS_H	0.001	17	7630196	SHBG	AFR__CSA__EUR__OTH	0.919384	-	-?-?--	-17.5431	1.43851e-101	0.00107476	192601	414	0				QT
M	SHBG	P+LP+VUS_H	0.01	17	7630196	SHBG	AFR__CSA__EUR__OTH	0.938921	-	-?-?--	-17.5431	1.43851e-101	0.00107476	192601	414	0				QT
B	ANGPTL3	P+LP+VUS_H+D	0.001	1	62597568	Triglycerides	AFR__AMR__CSA__EAS__EUR__OTH	1.02602	-	------	-0.473041	1.52096e-101	0.00210304	460309	1934.1	1				QT
B	ANGPTL3	P+LP+VUS_H+D	0.01	1	62597568	Triglycerides	AFR__AMR__CSA__EAS__EUR__OTH	1.05552	-	------	-0.473041	1.52096e-101	0.00210304	460309	1934.1	1				QT
M	GALNS	PVS1_P	0.001	16	88814441	FAI	AFR__EUR	0.79363	+	-???+?	133.85	1.64668e-101	1.3808e-05	181054	5	0				QT
M	GALNS	PVS1_P	0.01	16	88814441	FAI	AFR__EUR	0.845248	+	-???+?	133.85	1.64668e-101	1.3808e-05	181054	5	0				QT
F	APOA5	PVS1_VSSMP	0.001	11	116790137	Triglycerides	CSA__EAS__EUR__OTH	0.97581	+	??-+++	1.0167	2.15699e-101	0.000626781	244902	307	0				QT
F	APOA5	PVS1_VSSMP	0.01	11	116790137	Triglycerides	CSA__EAS__EUR__OTH	1.04889	+	??-+++	1.0167	2.15699e-101	0.000626781	244902	307	0				QT
B	SCARB1	P+LP+VUS_H+D	0.001	12	124782684	HDL	AFR__AMR__CSA__EAS__EUR__OTH	0.810108	+	+++-++	0.171601	2.50142e-101	0.00266736	421626	2247.25	1				QT
B	SCARB1	P+LP+VUS_H+D	0.01	12	124782684	HDL	AFR__AMR__CSA__EAS__EUR__OTH	0.86135	+	+++-++	0.171601	2.50142e-101	0.00266736	421626	2247.25	1				QT
B	RNF128	P+LP+VUS_H+D	0.01	23	106726914	eGFR	AFR__AMR__CSA__EAS__EUR__OTH	0.940088	-	+++---	-2.31541	3.84669e-101	0.00962211	460450	4597	2132				QT
B	FOXH1	PVS1_M	0.001	8	144474241	FAI	EUR	0.817638	+	????+?	80.3818	5.82574e-101	1.13354e-05	352876	8	0				QT
B	FOXH1	PVS1_M	0.01	8	144474241	FAI	EUR	0.864406	+	????+?	80.3818	5.82574e-101	1.13354e-05	352876	8	0				QT
B	HBB	P+LP+VUS_H+D	0.01	11	5225487	HbA1c	AFR__AMR__CSA__EAS__EUR__OTH	0.968316	-	--++--	-4.23829	1.24794e-100	0.00112589	459465	1032.61	1				QT
F	SHBG	PVS1_VSSM	0.001	17	7630196	SHBG	AFR__CSA__EAS__EUR__OTH	0.90362	-	-?----	-32.1763	1.58563e-100	0.000981849	224067	440	0				QT
F	SHBG	PVS1_VSSM	0.01	17	7630196	SHBG	AFR__CSA__EAS__EUR__OTH	0.932463	-	-?----	-32.1763	1.58563e-100	0.000981849	224067	440	0				QT
F	SHBG	PVS1_VSSMP	0.001	17	7630196	SHBG	AFR__CSA__EAS__EUR__OTH	0.90362	-	-?----	-32.1763	1.58563e-100	0.000981849	224067	440	0				QT
F	SHBG	PVS1_VSSMP	0.01	17	7630196	SHBG	AFR__CSA__EAS__EUR__OTH	0.932463	-	-?----	-32.1763	1.58563e-100	0.000981849	224067	440	0				QT
B	LDLR	P+LP	0.001	19	11089550	Cholesterol	AFR__AMR__CSA__EAS__EUR__OTH	0.97357	+	++++++	0.611245	2.60957e-100	0.00169248	460677	1559.37	0				QT
B	LDLR	P+LP	0.01	19	11089550	Cholesterol	AFR__AMR__CSA__EAS__EUR__OTH	0.997683	+	++++++	0.611245	2.60957e-100	0.00169248	460677	1559.37	0				QT
F	SHBG	PVS1_VSS	0.001	17	7630196	SHBG	AFR__CSA__EAS__EUR__OTH	0.90362	-	-?----	-32.2811	5.35618e-100	0.000970692	224067	435	0				QT
F	SHBG	PVS1_VSS	0.01	17	7630196	SHBG	AFR__CSA__EAS__EUR__OTH	0.932463	-	-?----	-32.2811	5.35618e-100	0.000970692	224067	435	0				QT
B	APOB	PVS1_VSS	0.001	2	21001742	Cholesterol	AFR__CSA__EAS__EUR__OTH	0.97357	-	-?----	-0.755672	6.50552e-100	0.00124929	460129	1149.67	0				QT
B	APOB	PVS1_VSS	0.01	2	21001742	Cholesterol	AFR__CSA__EAS__EUR__OTH	0.997683	-	-?----	-0.755672	6.50552e-100	0.00124929	460129	1149.67	0				QT
B	LPL	P+LP+VUS_H+D	0.001	8	19939442	Triglycerides	AFR__AMR__CSA__EAS__EUR__OTH	1.02602	+	+-++++	0.563494	8.05215e-100	0.00146646	460309	1350.05	0				QT
B	LPL	P+LP+VUS_H+D	0.01	8	19939442	Triglycerides	AFR__AMR__CSA__EAS__EUR__OTH	1.05552	+	+-++++	0.563494	8.05215e-100	0.00146646	460309	1350.05	0				QT
F	PKD1	P+LP	singleton	16	2089733	eGFR	AFR__CSA__EAS__EUR__OTH	0.864137	-	-?----	-29.8529	1.45937e-99	0.000163637	249218	81.56	0				QT
B	GCK	P+LP+VUS_H	0.001	7	44145154	HbA1c	AFR__AMR__CSA__EAS__EUR__OTH	0.94188	+	+--+++	7.22932	3.75642e-99	0.000402642	459465	370	0				QT
B	GCK	P+LP+VUS_H	0.01	7	44145154	HbA1c	AFR__AMR__CSA__EAS__EUR__OTH	0.968316	+	+--+++	7.22932	3.75642e-99	0.000402642	459465	370	0				QT
B	SLC22A2	P+LP+VUS_H+D	0.01	6	160217441	eGFR	AFR__AMR__CSA__EAS__EUR__OTH	0.940088	-	-+----	-4.75048	7.35463e-99	0.00326182	460450	2989.81	7				QT
B	PKD1	P+LP	0.001	16	2089733	End_stage_renal_disease_CDK_stage_5	AFR__CSA__EUR__OTH	0.928649	+	++++	151.381	7.4023e-99	0.000953392	1706	90	0	478191	823.06	1	BT
B	PKD1	P+LP	0.01	16	2089733	End_stage_renal_disease_CDK_stage_5	AFR__CSA__EUR__OTH	0.961236	+	++++	151.381	7.4023e-99	0.000953392	1706	90	0	478191	823.06	1	BT
B	LPL	P+LP	0.001	8	19939442	Triglycerides	AFR__CSA__EAS__EUR__OTH	1.02602	+	+?++++	0.639851	9.96575e-99	0.0011376	459761	1046.05	0				QT
B	LPL	P+LP	0.01	8	19939442	Triglycerides	AFR__CSA__EAS__EUR__OTH	1.05552	+	+?++++	0.639851	9.96575e-99	0.0011376	459761	1046.05	0				QT
M	SHBG	PVS1_VSSM	0.001	17	7630196	SHBG	CSA__EUR__OTH	0.919384	-	??-?--	-17.9384	2.05046e-98	0.00102004	189699	387	0				QT
M	SHBG	PVS1_VSSM	0.01	17	7630196	SHBG	CSA__EUR__OTH	0.938921	-	??-?--	-17.9384	2.05046e-98	0.00102004	189699	387	0				QT
M	SHBG	PVS1_VSSMP	0.001	17	7630196	SHBG	CSA__EUR__OTH	0.919384	-	??-?--	-17.9384	2.05046e-98	0.00102004	189699	387	0				QT
M	SHBG	PVS1_VSSMP	0.01	17	7630196	SHBG	CSA__EUR__OTH	0.938921	-	??-?--	-17.9384	2.05046e-98	0.00102004	189699	387	0				QT
F	LDLR	D	0.001	19	11089550	LDL	AFR__AMR__CSA__EAS__EUR__OTH	0.970828	+	++++++	0.610008	3.07633e-98	0.00173193	249283	863.48	0				QT
F	LDLR	D	0.01	19	11089550	LDL	AFR__AMR__CSA__EAS__EUR__OTH	0.979688	+	++++++	0.608212	4.27651e-98	0.00173394	249283	864.48	0				QT
M	SHBG	PVS1_VSS	0.001	17	7630196	SHBG	CSA__EUR__OTH	0.919384	-	??-?--	-17.9265	4.89741e-98	0.0010174	189699	386	0				QT
M	SHBG	PVS1_VSS	0.01	17	7630196	SHBG	CSA__EUR__OTH	0.938921	-	??-?--	-17.9265	4.89741e-98	0.0010174	189699	386	0				QT
M	SHBG	PVS1_S	0.001	17	7630196	FAI	EUR__OTH	0.79363	+	????++	17.2926	7.34216e-98	0.000840979	184309	310	0				QT
M	SHBG	PVS1_S	0.01	17	7630196	FAI	EUR__OTH	0.845248	+	????++	17.2926	7.34216e-98	0.000840979	184309	310	0				QT
F	APOA5	PVS1_VSS	0.001	11	116790137	Triglycerides	CSA__EAS__EUR__OTH	0.97581	+	??-+++	1.01232	1.24863e-97	0.000608407	244902	298	0				QT
F	APOA5	PVS1_VSS	0.01	11	116790137	Triglycerides	CSA__EAS__EUR__OTH	1.04889	+	??-+++	1.01232	1.24863e-97	0.000608407	244902	298	0				QT
F	ABCA1	P+LP+VUS_H+D	0.001	9	104784318	HDL	AFR__AMR__CSA__EAS__EUR__OTH	0.821987	-	-+----	-0.165791	1.65334e-97	0.00617928	226862	2797.69	3				QT
B	PNPLA1	PVS1_VS	singleton	6	36270462	FAI	AFR__CSA__EAS__EUR__OTH	0.642733	+	+?--++	51.84	5.01516e-97	2.92219e-05	380223	22.22	0				QT
B	PNPLA1	PVS1_VSS	singleton	6	36270462	FAI	AFR__CSA__EAS__EUR__OTH	0.642733	+	+?--++	51.84	5.01516e-97	2.92219e-05	380223	22.22	0				QT
M	PIGL	PVS1_VSSM	singleton	17	16217227	FAI	CSA__EUR__OTH	0.655588	+	??+?++	79.3048	7.44866e-97	4.24142e-05	188616	16	0				QT
B	PIGL	P+LP+VUS_H	singleton	17	16217227	FAI	CSA__EUR__OTH	0.642733	+	??+?++	46.2121	7.65786e-97	3.76105e-05	372236	28	0				QT
F	HBB	P	0.001	11	5225487	HbA1c	AFR__CSA__EAS__EUR__OTH	0.921872	-	-?+---	-7.60382	2.00844e-96	0.000639044	248809	318	0				QT
B	LIPC	P+LP+VUS_H+D	0.01	15	58432041	Apolipoprotein_A	AFR__AMR__CSA__EAS__EUR__OTH	0.670867	+	++++++	0.0885694	4.02026e-96	0.00657247	419314	5493.85	9				QT
B	WWC1	PVS1_M	singleton	5	168292154	FAI	EUR	0.642733	+	????+?	90.3748	8.21415e-96	8.50157e-06	352876	6	0				QT
F	PKD1	PVS1_VS	singleton	16	2089733	eGFR	AFR__CSA__EAS__EUR__OTH	0.864137	-	-?++--	-33.0311	2.12262e-95	0.000131537	249218	65.56	0				QT
F	ABCA1	P+LP	0.001	9	104784318	Apolipoprotein_A	AFR__CSA__EAS__EUR__OTH	0.661516	-	-?----	-0.369327	2.75916e-95	0.000835141	224513	375	0				QT
F	ABCA1	P+LP	0.01	9	104784318	Apolipoprotein_A	AFR__CSA__EAS__EUR__OTH	0.651155	-	-?----	-0.369327	2.75916e-95	0.000835141	224513	375	0				QT
B	GCK	P+LP	0.001	7	44145154	HbA1c	AFR__AMR__CSA__EAS__EUR__OTH	0.94188	+	+-++++	8.70638	3.15734e-95	0.000265526	459465	244	0				QT
B	GCK	P+LP	0.01	7	44145154	HbA1c	AFR__AMR__CSA__EAS__EUR__OTH	0.968316	+	+-++++	8.70638	3.15734e-95	0.000265526	459465	244	0				QT
F	PCSK9	P+LP+VUS_H+D	0.01	1	55039838	Cholesterol	AFR__AMR__CSA__EAS__EUR__OTH	0.946953	-	------	-0.491592	6.74065e-95	0.00429487	249693	2142.8	1				QT
B	PCSK9	PVS1_S	0.001	1	55039838	LDL	AFR__EUR__OTH	0.994287	-	-???--	-0.828886	2.00752e-93	0.000509607	448385	457	0				QT
B	PCSK9	PVS1_S	0.01	1	55039838	LDL	AFR__EUR__OTH	1.02789	-	-???--	-0.828886	2.00752e-93	0.000509607	448385	457	0				QT
B	SCARB1	D	0.001	12	124782684	HDL	AFR__AMR__CSA__EAS__EUR__OTH	0.810108	+	+++-++	0.170034	2.13617e-93	0.00249866	421626	2105	1				QT
B	SCARB1	D	0.01	12	124782684	HDL	AFR__AMR__CSA__EAS__EUR__OTH	0.86135	+	+++-++	0.170034	2.13617e-93	0.00249866	421626	2105	1				QT
B	PCSK9	P+LP+VUS_H	0.01	1	55039838	Cholesterol	AFR__AMR__CSA__EAS__EUR__OTH	0.997683	-	------	-0.588875	7.00476e-93	0.00167529	460677	1543.53	0				QT
B	GCK	P+LP+VUS_H+D	0.001	7	44145154	HbA1c	AFR__AMR__CSA__EAS__EUR__OTH	0.94188	+	+--+++	6.28223	1.38745e-92	0.000495141	459465	455	0				QT
B	GCK	P+LP+VUS_H+D	0.01	7	44145154	HbA1c	AFR__AMR__CSA__EAS__EUR__OTH	0.968316	+	+--+++	6.28223	1.38745e-92	0.000495141	459465	455	0				QT
B	PCSK9	P+LP	0.01	1	55039838	Cholesterol	AFR__AMR__CSA__EAS__EUR__OTH	0.997683	-	------	-0.833513	2.22007e-92	0.000826129	460677	761.16	0				QT
F	HBB	P	0.01	11	5225487	HbA1c	AFR__CSA__EAS__EUR__OTH	0.924101	-	-?----	-7.25317	1.27924e-91	0.000711389	248809	354	0				QT
B	APOB	PVS1_VSS	singleton	2	21001742	LDL	AFR__CSA__EAS__EUR__OTH	0.950882	-	-?----	-1.49355	1.72755e-91	0.000152472	459266	140.05	0				QT
M	LMTK2	P+LP	singleton	7	98107183	Oestrodiol	EUR	0.624107	+	??+?	757.585	2.94597e-91	0.000150748	16584	5	0				QT
M	LMTK2	P+LP	0.001	7	98107183	Oestrodiol	EUR	0.728588	+	??+?	757.585	2.94597e-91	0.000150748	16584	5	0				QT
M	LMTK2	P+LP	0.01	7	98107183	Oestrodiol	EUR	0.831645	+	??+?	757.585	2.94597e-91	0.000150748	16584	5	0				QT
M	LMTK2	PVS1_VS	singleton	7	98107183	Oestrodiol	EUR	0.624107	+	??+?	757.585	2.94597e-91	0.000150748	16584	5	0				QT
M	LMTK2	PVS1_VS	0.001	7	98107183	Oestrodiol	EUR	0.728588	+	??+?	757.585	2.94597e-91	0.000150748	16584	5	0				QT
M	LMTK2	PVS1_VS	0.01	7	98107183	Oestrodiol	EUR	0.831645	+	??+?	757.585	2.94597e-91	0.000150748	16584	5	0				QT
B	APOB	PVS1_VSSM	0.001	2	21001742	Cholesterol	AFR__CSA__EAS__EUR__OTH	0.97357	-	-?----	-0.674002	3.62932e-91	0.00141338	460129	1300.67	0				QT
B	APOB	PVS1_VSSM	0.01	2	21001742	Cholesterol	AFR__CSA__EAS__EUR__OTH	0.997683	-	-?----	-0.674002	3.62932e-91	0.00141338	460129	1300.67	0				QT
B	APOB	PVS1_VSSMP	0.001	2	21001742	Cholesterol	AFR__CSA__EAS__EUR__OTH	0.97357	-	-?----	-0.674002	3.62932e-91	0.00141338	460129	1300.67	0				QT
B	APOB	PVS1_VSSMP	0.01	2	21001742	Cholesterol	AFR__CSA__EAS__EUR__OTH	0.997683	-	-?----	-0.674002	3.62932e-91	0.00141338	460129	1300.67	0				QT
M	TAF6L	PVS1_VSSM	0.001	11	62775784	Oestrodiol	EUR	0.728588	+	??+?	755.873	9.36884e-91	0.000150748	16584	5	0				QT
M	TAF6L	PVS1_VSSM	0.01	11	62775784	Oestrodiol	EUR	0.831645	+	??+?	755.873	9.36884e-91	0.000150748	16584	5	0				QT
M	TAF6L	PVS1_VSSMP	0.001	11	62775784	Oestrodiol	EUR	0.728588	+	??+?	755.873	9.36884e-91	0.000150748	16584	5	0				QT
M	TAF6L	PVS1_VSSMP	0.01	11	62775784	Oestrodiol	EUR	0.831645	+	??+?	755.873	9.36884e-91	0.000150748	16584	5	0				QT
M	APOL3	P+LP+VUS_H+D	0.001	22	36141200	Oestrodiol	EUR__OTH	0.728588	+	??++	611.899	2.20135e-90	0.000145433	17190	5	0				QT
B	PCSK9	P+LP	0.001	1	55039838	Cholesterol	AFR__CSA__EAS__EUR__OTH	0.97357	-	-?----	-0.860747	3.66634e-90	0.00075648	460129	696.16	0				QT
F	PCSK9	PVS1_VSSMP	0.01	1	55039838	LDL	AFR__AMR__CSA__EAS__EUR__OTH	0.979688	-	------	-0.720183	4.40256e-90	0.0011191	249283	555.94	1				QT
F	PCSK9	PVS1_VSSMP	0.001	1	55039838	LDL	AFR__CSA__EAS__EUR__OTH	0.970828	-	-?----	-0.748365	5.03054e-90	0.0010444	248919	517.94	1				QT
B	PKD1	PVS1_VSSM	0.001	16	2089733	End_stage_renal_disease_CDK_stage_5	AFR__CSA__EUR__OTH	0.928649	+	++++	185.075	9.89888e-90	0.000572058	1706	74	0	478191	471.06	2	BT
B	PKD1	PVS1_VSSM	0.01	16	2089733	End_stage_renal_disease_CDK_stage_5	AFR__CSA__EUR__OTH	0.961236	+	++++	185.075	9.89888e-90	0.000572058	1706	74	0	478191	471.06	2	BT
B	PKD1	PVS1_VSSMP	0.001	16	2089733	End_stage_renal_disease_CDK_stage_5	AFR__CSA__EUR__OTH	0.928649	+	++++	185.075	9.89888e-90	0.000572058	1706	74	0	478191	471.06	2	BT
B	PKD1	PVS1_VSSMP	0.01	16	2089733	End_stage_renal_disease_CDK_stage_5	AFR__CSA__EUR__OTH	0.961236	+	++++	185.075	9.89888e-90	0.000572058	1706	74	0	478191	471.06	2	BT
B	PCSK9	P+LP+VUS_H	0.001	1	55039838	Cholesterol	AFR__CSA__EAS__EUR__OTH	0.97357	-	-?----	-0.591295	1.11844e-89	0.00160665	460129	1478.53	0				QT
F	PKD1	PVS1_VSSM	singleton	16	2089733	eGFR	AFR__CSA__EAS__EUR__OTH	0.864137	-	-?-+--	-29.2151	1.44767e-89	0.000153606	249218	76.56	0				QT
F	PKD1	PVS1_VSSMP	singleton	16	2089733	eGFR	AFR__CSA__EAS__EUR__OTH	0.864137	-	-?-+--	-29.2151	1.44767e-89	0.000153606	249218	76.56	0				QT
F	LDLR	P+LP+VUS_H+D	0.001	19	11089550	Apolipoprotein_B	AFR__AMR__CSA__EAS__EUR__OTH	0.986638	+	++++++	0.142958	2.01102e-89	0.0021878	248830	1088.78	0				QT
F	PCSK9	P+LP+VUS_H+D	0.001	1	55039838	LDL	AFR__CSA__EAS__EUR__OTH	0.970828	-	-?----	-0.46511	2.31934e-89	0.00268734	248919	1337.86	0				QT
F	PCSK9	PVS1_VSSM	0.01	1	55039838	LDL	AFR__AMR__CSA__EAS__EUR__OTH	0.979688	-	------	-0.718207	2.76828e-89	0.00111509	249283	553.94	1				QT
B	APOB	P+LP	singleton	2	21001742	LDL	AFR__CSA__EAS__EUR__OTH	0.950882	-	-?----	-1.53127	3.22556e-89	0.000141585	459266	130.05	0				QT
F	PCSK9	PVS1_VSSM	0.001	1	55039838	LDL	AFR__CSA__EAS__EUR__OTH	0.970828	-	-?----	-0.746345	3.28565e-89	0.00104039	248919	515.94	1				QT
F	LDLR	P+LP+VUS_H+D	0.01	19	11089550	Apolipoprotein_B	AFR__AMR__CSA__EAS__EUR__OTH	0.97542	+	++++++	0.142482	3.357e-89	0.00218981	248830	1089.78	0				QT
B	PKD1	P+LP	singleton	16	2089733	CKD_All	AFR__CSA__EUR__OTH	1.07487	+	+?+?++	36.1102	7.48712e-89	0.000135447	25418	73	0	454479	57	0	BT
M	ABCA1	P+LP+VUS_H+D	0.001	9	104784318	Apolipoprotein_A	AFR__AMR__CSA__EAS__EUR__OTH	0.699283	-	------	-0.113529	1.34632e-88	0.00626444	194474	2430.54	3				QT
B	APOB	P+LP+VUS_H	singleton	2	21001742	LDL	AFR__CSA__EAS__EUR__OTH	0.950882	-	-?----	-1.45079	2.09954e-88	0.000155738	459266	143.05	0				QT
F	SHBG	P+LP+VUS_H+D	0.01	17	7630196	FAI	AFR__AMR__CSA__EAS__EUR__OTH	0.940317	+	++++++	2.09273	2.1821e-88	0.00118117	188373	445	0				QT
F	SHBG	P+LP+VUS_H+D	0.001	17	7630196	FAI	AFR__CSA__EAS__EUR__OTH	0.860216	+	+?++++	2.09656	2.74891e-88	0.00118013	188115	444	0				QT
F	ABCA1	P+LP+VUS_H+D	0.001	9	104784318	Apolipoprotein_A	AFR__AMR__CSA__EAS__EUR__OTH	0.661516	-	------	-0.130356	5.27926e-88	0.00619939	224840	2781.74	3				QT
F	LDLR	P+LP+VUS_H	0.001	19	11089550	Apolipoprotein_B	AFR__AMR__CSA__EAS__EUR__OTH	0.986638	+	++++++	0.145731	7.69754e-88	0.00206724	248830	1028.78	0				QT
F	PKD1	PVS1_VSS	singleton	16	2089733	eGFR	AFR__CSA__EAS__EUR__OTH	0.864137	-	-?-+--	-29.5208	1.03227e-87	0.000147587	249218	73.56	0				QT
F	LDLR	P+LP+VUS_H	0.01	19	11089550	Apolipoprotein_B	AFR__AMR__CSA__EAS__EUR__OTH	0.97542	+	++++++	0.145221	1.30187e-87	0.00206925	248830	1029.78	0				QT
B	LDLR	D	0.001	19	11089550	Apolipoprotein_B	AFR__AMR__CSA__EAS__EUR__OTH	0.985693	+	++++++	0.122935	1.5872e-87	0.00162551	458351	1490.11	0				QT
B	LDLR	D	0.01	19	11089550	Apolipoprotein_B	AFR__AMR__CSA__EAS__EUR__OTH	1.03	+	++++++	0.122935	1.5872e-87	0.00162551	458351	1490.11	0				QT
B	LCAT	P+LP+VUS_H	0.001	16	67939916	HDL	AFR__CSA__EAS__EUR__OTH	0.810108	-	-?----	-0.365155	1.78524e-87	0.000521381	421119	439.13	0				QT
B	LCAT	P+LP+VUS_H	0.01	16	67939916	HDL	AFR__CSA__EAS__EUR__OTH	0.86135	-	-?----	-0.365155	1.78524e-87	0.000521381	421119	439.13	0				QT
B	PKD1	P+LP+VUS_H	singleton	16	2089733	CKD_All	AFR__CSA__EAS__EUR__OTH	1.07487	+	+?+-++	23.876	7.00628e-87	0.000211556	25471	87	0	456674	117	0	BT
B	LDLR	D	0.001	19	11089550	Cholesterol	AFR__AMR__CSA__EAS__EUR__OTH	0.97357	+	++++++	0.571251	8.06798e-87	0.00166179	460677	1531.1	0				QT
B	LDLR	D	0.01	19	11089550	Cholesterol	AFR__AMR__CSA__EAS__EUR__OTH	0.997683	+	++++++	0.571251	8.06798e-87	0.00166179	460677	1531.1	0				QT
B	PKD1	PVS1_VS	0.001	16	2089733	End_stage_renal_disease_CDK_stage_5	AFR__CSA__EUR__OTH	0.928649	+	+-++	228.385	1.09176e-86	0.000453282	1706	67	0	478191	366.06	1	BT
B	PKD1	PVS1_VS	0.01	16	2089733	End_stage_renal_disease_CDK_stage_5	AFR__CSA__EUR__OTH	0.961236	+	+-++	228.385	1.09176e-86	0.000453282	1706	67	0	478191	366.06	1	BT
M	PCSK9	P+LP+VUS_H+D	0.001	1	55039838	LDL	AFR__CSA__EAS__EUR__OTH	0.972585	-	-?----	-0.503507	1.87225e-86	0.00269624	210347	1132.29	1				QT
B	PKD1	PVS1_VSS	0.001	16	2089733	End_stage_renal_disease_CDK_stage_5	AFR__CSA__EUR__OTH	0.928649	+	++++	208.092	1.88848e-86	0.000548094	1706	71	0	478191	451.06	2	BT
B	PKD1	PVS1_VSS	0.01	16	2089733	End_stage_renal_disease_CDK_stage_5	AFR__CSA__EUR__OTH	0.961236	+	++++	208.092	1.88848e-86	0.000548094	1706	71	0	478191	451.06	2	BT
B	LCAT	P+LP+VUS_H+D	0.001	16	67939916	Apolipoprotein_A	AFR__CSA__EAS__EUR__OTH	0.675979	-	-?-+--	-0.231707	2.05664e-86	0.000870481	418810	729.13	0				QT
B	LCAT	P+LP+VUS_H+D	0.01	16	67939916	Apolipoprotein_A	AFR__CSA__EAS__EUR__OTH	0.670867	-	-?-+--	-0.231707	2.05664e-86	0.000870481	418810	729.13	0				QT
B	SHBG	P+LP+VUS_H+D	0.001	17	7630196	Testosterone	AFR__AMR__CSA__EAS__EUR__OTH	0.985622	-	-+----	-1.6511	2.71609e-86	0.00124395	417221	1038	0				QT
F	LPA	D	0.01	6	160531735	Lipoprotein_A	AFR__AMR__CSA__EAS__EUR__OTH	0.914732	-	------	-11.5475	4.3824e-86	0.0179189	200342	7081.81	49				QT
M	PCSK9	P+LP+VUS_H+D	0.01	1	55039838	Cholesterol	AFR__AMR__CSA__EAS__EUR__OTH	0.993414	-	------	-0.52815	5.19135e-86	0.00417779	210984	1758.89	2				QT
M	DKK3	PVS1_S	singleton	11	11964474	FAI	CSA__EUR	0.655588	+	??-?+?	112.419	6.56327e-86	1.91804e-05	182478	7	0				QT
B	SHBG	P+LP+VUS_H+D	0.01	17	7630196	Testosterone	AFR__AMR__CSA__EAS__EUR__OTH	1.02436	-	-+----	-1.64352	7.85427e-86	0.00124514	417221	1039	0				QT
F	ABCA1	P+LP+VUS_H+D	0.01	9	104784318	HDL	AFR__AMR__CSA__EAS__EUR__OTH	0.812249	-	-+----	-0.112046	1.22932e-85	0.0117397	226862	5308.59	9				QT
F	LHFPL6	PVS1_VSS	0.001	13	39343939	HbA1c	EUR	0.921872	+	????+?	50.0893	1.33605e-85	1.07934e-05	231623	5	0				QT
F	LHFPL6	PVS1_VSS	0.01	13	39343939	HbA1c	EUR	0.924101	+	????+?	50.0893	1.33605e-85	1.07934e-05	231623	5	0				QT
B	APOB	P+LP	0.001	2	21001742	LDL	AFR__AMR__CSA__EAS__EUR__OTH	0.994287	-	---+--	-0.390415	1.7624e-85	0.00203789	459814	1872.1	1				QT
B	APOB	P+LP	0.01	2	21001742	LDL	AFR__AMR__CSA__EAS__EUR__OTH	1.02789	-	---+--	-0.390415	1.7624e-85	0.00203789	459814	1872.1	1				QT
M	ABCA1	P+LP+VUS_H+D	0.001	9	104784318	HDL	AFR__AMR__CSA__EAS__EUR__OTH	0.840479	-	------	-0.132665	1.98894e-85	0.00626583	194764	2434.72	3				QT
F	LDLR	P+LP	0.001	19	11089550	Apolipoprotein_B	AFR__AMR__CSA__EAS__EUR__OTH	0.986638	+	++++++	0.157044	2.38803e-85	0.00172894	248830	860.42	0				QT
F	LDLR	P+LP	0.01	19	11089550	Apolipoprotein_B	AFR__AMR__CSA__EAS__EUR__OTH	0.97542	+	++++++	0.156405	4.27042e-85	0.00173095	248830	861.42	0				QT
M	PCSK9	PVS1_VSSMP	0.01	1	55039838	LDL	AFR__CSA__EAS__EUR__OTH	0.994606	-	-?----	-0.856441	8.14562e-85	0.000927345	210347	390.13	0				QT
F	LDLR	P	0.001	19	11089550	Apolipoprotein_B	AFR__AMR__CSA__EAS__EUR__OTH	0.986638	+	++++++	0.183117	8.80807e-85	0.00125977	248830	626.94	0				QT
B	APOB	P+LP+VUS_H	0.001	2	21001742	LDL	AFR__AMR__CSA__EAS__EUR__OTH	0.994287	-	-+-+--	-0.383027	9.16161e-85	0.00210236	459814	1931.39	1				QT
B	APOB	P+LP+VUS_H	0.01	2	21001742	LDL	AFR__AMR__CSA__EAS__EUR__OTH	1.02789	-	-+-+--	-0.383027	9.16161e-85	0.00210236	459814	1931.39	1				QT
F	PCSK9	P+LP+VUS_H+D	0.001	1	55039838	Apolipoprotein_B	AFR__CSA__EAS__EUR__OTH	0.986638	-	-?----	-0.124475	9.43873e-85	0.00267413	248468	1328.87	0				QT
M	PCSK9	P+LP+VUS_H+D	0.001	1	55039838	Apolipoprotein_B	AFR__CSA__EAS__EUR__OTH	0.961118	-	-?----	-0.139258	1.34462e-84	0.00268537	209339	1122.31	1				QT
B	PKD1	PVS1_VSSM	singleton	16	2089733	CKD_All	AFR__CSA__EAS__EUR__OTH	1.07487	+	+?+-++	37.9499	1.41621e-84	0.000130668	25471	68	0	456674	58	0	BT
B	PKD1	PVS1_VSSMP	singleton	16	2089733	CKD_All	AFR__CSA__EAS__EUR__OTH	1.07487	+	+?+-++	37.9499	1.41621e-84	0.000130668	25471	68	0	456674	58	0	BT
F	LDLR	P	0.01	19	11089550	Apolipoprotein_B	AFR__AMR__CSA__EAS__EUR__OTH	0.97542	+	++++++	0.18215	1.81112e-84	0.00126178	248830	627.94	0				QT
B	DKK3	P+LP	singleton	11	11964474	FAI	AFR__EUR__OTH	0.642733	+	+???++	54.4034	1.85256e-84	2.02056e-05	371184	15	0				QT
M	HOXC13	D	0.001	12	53938908	Oestrodiol	EUR__OTH	0.728588	+	??+-	572.724	3.31985e-84	0.000145433	17190	5	0				QT
B	GCK	P	0.001	7	44145154	HbA1c	AMR__CSA__EUR__OTH	0.94188	+	?-+?++	10.0278	4.59492e-84	0.000179618	450957	162	0				QT
B	GCK	P	0.01	7	44145154	HbA1c	AMR__CSA__EUR__OTH	0.968316	+	?-+?++	10.0278	4.59492e-84	0.000179618	450957	162	0				QT
B	APOB	PVS1_VS	singleton	2	21001742	LDL	AFR__CSA__EAS__EUR__OTH	0.950882	-	-?----	-1.52602	7.01281e-84	0.000133964	459266	123.05	0				QT
B	PKD1	PVS1_VS	singleton	16	2089733	CKD_All	AFR__CSA__EAS__EUR__OTH	1.07487	+	+?--++	44.4109	8.40728e-84	0.00010889	25471	63	0	456674	42	0	BT
B	PCSK9	PVS1_S	0.001	1	55039838	Apolipoprotein_B	AFR__EUR__OTH	0.985693	-	-???-+	-0.217433	2.73613e-83	0.000496647	446998	444	0				QT
B	PCSK9	PVS1_S	0.01	1	55039838	Apolipoprotein_B	AFR__EUR__OTH	1.03	-	-???-+	-0.217433	2.73613e-83	0.000496647	446998	444	0				QT
B	AQR	PVS1_S	singleton	15	34856798	FAI	AFR__EAS__EUR	0.642733	+	-??-+?	52.266	3.8e-83	2.07835e-05	360863	15	0				QT
F	SHBG	PVS1_S	0.001	17	7630196	SHBG	EUR__OTH	0.90362	-	????--	-32.2041	5.41326e-83	0.000840945	215234	362	0				QT
F	SHBG	PVS1_S	0.01	17	7630196	SHBG	EUR__OTH	0.932463	-	????--	-32.2041	5.41326e-83	0.000840945	215234	362	0				QT
M	PCSK9	PVS1_VSSM	0.01	1	55039838	LDL	AFR__CSA__EAS__EUR__OTH	0.994606	-	-?----	-0.853518	5.82093e-83	0.000913083	210347	384.13	0				QT
M	SHBG	P+LP+VUS_H+D	0.001	17	7630196	Testosterone	AFR__CSA__EUR__OTH	0.945397	-	-?-?--	-3.06195	4.18162e-82	0.00131418	208114	547	0				QT
M	SHBG	P+LP+VUS_H+D	0.01	17	7630196	Testosterone	AFR__CSA__EUR__OTH	1.00893	-	-?-?--	-3.06195	4.18162e-82	0.00131418	208114	547	0				QT
B	ZNF106	PVS1_S	0.001	15	42417308	FAI	AFR__CSA__EUR__OTH	0.817638	+	+?+?+-	32.6007	1.00414e-81	5.28498e-05	378431	40	0				QT
B	ZNF106	PVS1_S	0.01	15	42417308	FAI	AFR__CSA__EUR__OTH	0.864406	+	+?+?+-	32.6007	1.00414e-81	5.28498e-05	378431	40	0				QT
F	PCSK9	PVS1_VSSMP	0.001	1	55039838	Apolipoprotein_B	AFR__CSA__EAS__EUR__OTH	0.986638	-	-?----	-0.197826	1.00718e-81	0.00102417	248468	506.95	1				QT
M	PCSK9	PVS1_VSSMP	0.001	1	55039838	LDL	AFR__CSA__EAS__EUR__OTH	0.972585	-	-?----	-0.868686	1.07789e-81	0.000865542	210347	364.13	0				QT
M	PIGL	PVS1_VSSMP	singleton	17	16217227	FAI	CSA__EUR__OTH	0.655588	+	??+?++	66.0595	1.40898e-81	5.03669e-05	188616	19	0				QT
B	LDLR	P+LP+VUS_H+D	0.001	19	11089550	DLP_All	AFR__AMR__CSA__EAS__EUR__OTH	0.98421	+	++++++	2.8163	1.47521e-81	0.00215439	82508	685.22	0	400207	1394.7	0	BT
B	LDLR	P+LP+VUS_H+D	0.01	19	11089550	DLP_All	AFR__AMR__CSA__EAS__EUR__OTH	1.03856	+	++++++	2.8163	1.47521e-81	0.00215439	82508	685.22	0	400207	1394.7	0	BT
F	LDLR	P+LP+VUS_H+D	0.001	19	11089550	Cholesterol	AFR__AMR__CSA__EAS__EUR__OTH	0.950335	+	++++++	0.634179	2.27232e-81	0.00224029	249693	1118.77	0				QT
B	LPL	D	0.001	8	19939442	Triglycerides	AFR__AMR__CSA__EAS__EUR__OTH	1.02602	+	+-++++	0.541933	2.84621e-81	0.00128283	460309	1181	0				QT
B	LPL	D	0.01	8	19939442	Triglycerides	AFR__AMR__CSA__EAS__EUR__OTH	1.05552	+	+-++++	0.541933	2.84621e-81	0.00128283	460309	1181	0				QT
F	LDLR	P+LP+VUS_H+D	0.01	19	11089550	Cholesterol	AFR__AMR__CSA__EAS__EUR__OTH	0.946953	+	++++++	0.632786	2.93341e-81	0.00224229	249693	1119.77	0				QT
F	PCSK9	PVS1_VSSM	0.001	1	55039838	Apolipoprotein_B	AFR__CSA__EAS__EUR__OTH	0.986638	-	-?----	-0.197334	5.19823e-81	0.00102015	248468	504.95	1				QT
B	PNPLA1	PVS1_VSSM	singleton	6	36270462	FAI	AFR__CSA__EAS__EUR__OTH	0.642733	+	+?--++	42.5075	5.52136e-81	3.5797e-05	380223	27.22	0				QT
B	PNPLA1	PVS1_VSSMP	singleton	6	36270462	FAI	AFR__CSA__EAS__EUR__OTH	0.642733	+	+?--++	42.5075	5.52136e-81	3.5797e-05	380223	27.22	0				QT
M	SHBG	PVS1_S	0.001	17	7630196	SHBG	EUR__OTH	0.919384	-	????--	-18.0215	7.42001e-81	0.000841556	185371	312	0				QT
M	SHBG	PVS1_S	0.01	17	7630196	SHBG	EUR__OTH	0.938921	-	????--	-18.0215	7.42001e-81	0.000841556	185371	312	0				QT
B	PCSK9	D	0.001	1	55039838	LDL	AFR__CSA__EAS__EUR__OTH	0.994287	-	-?----	-0.378599	7.6928e-81	0.00203373	459266	1864.05	2				QT
B	UBL4B	P+LP+VUS_H+D	singleton	1	110112535	HbA1c	EUR__OTH	0.826782	+	????+-	34.1352	1.0411e-80	1.58458e-05	441758	14	0				QT
F	LDLR	P+LP+VUS_H	0.001	19	11089550	Cholesterol	AFR__AMR__CSA__EAS__EUR__OTH	0.950335	+	++++++	0.649138	1.06271e-80	0.00212014	249693	1058.77	0				QT
M	UBL4B	P+LP+VUS_H+D	singleton	1	110112535	HbA1c	EUR__OTH	0.85299	+	????+-	43.8265	1.243e-80	2.72097e-05	202134	11	0				QT
F	LDLR	P+LP+VUS_H	0.01	19	11089550	Cholesterol	AFR__AMR__CSA__EAS__EUR__OTH	0.946953	+	++++++	0.647637	1.3851e-80	0.00212214	249693	1059.77	0				QT
B	PKD1	PVS1_VSS	singleton	16	2089733	CKD_All	AFR__CSA__EAS__EUR__OTH	1.07487	+	+?--++	39.3463	1.46511e-80	0.000122371	25471	64	0	456674	54	0	BT
F	PCSK9	PVS1_VSSMP	0.01	1	55039838	Apolipoprotein_B	AFR__AMR__CSA__EAS__EUR__OTH	0.97542	-	-+----	-0.189133	3.46801e-80	0.00109301	248830	541.95	1				QT
B	SLC22A2	P+LP+VUS_H	0.01	6	160217441	eGFR	AFR__AMR__CSA__EAS__EUR__OTH	0.940088	-	-+----	-5.61802	4.3729e-80	0.00188511	460450	1726	5				QT
B	LDLR	P+LP+VUS_H+D	0.001	19	11089550	Pure_hypercholesterolemia	AFR__AMR__CSA__EAS__EUR__OTH	0.973429	+	++++++	2.83876	6.07951e-80	0.00215439	76319	648.22	0	406396	1431.7	0	BT
B	LDLR	P+LP+VUS_H+D	0.01	19	11089550	Pure_hypercholesterolemia	AFR__AMR__CSA__EAS__EUR__OTH	1.03117	+	++++++	2.83876	6.07951e-80	0.00215439	76319	648.22	0	406396	1431.7	0	BT
B	LDLR	P	0.001	19	11089550	DLP_All	AFR__AMR__CSA__EAS__EUR__OTH	0.98421	+	++++++	3.78112	6.24521e-80	0.00123572	82508	442.32	0	400207	750.69	0	BT
B	LDLR	P	0.01	19	11089550	DLP_All	AFR__AMR__CSA__EAS__EUR__OTH	1.03856	+	++++++	3.78112	6.24521e-80	0.00123572	82508	442.32	0	400207	750.69	0	BT
M	PCSK9	PVS1_VSSM	0.001	1	55039838	LDL	AFR__CSA__EAS__EUR__OTH	0.972585	-	-?----	-0.865766	7.85798e-80	0.00085128	210347	358.13	0				QT
B	LIPC	D	0.01	15	58432041	HDL	AFR__AMR__CSA__EAS__EUR__OTH	0.86135	+	+-++++	0.103768	1.50973e-79	0.00565267	421626	4744.63	11				QT
B	ANGPTL3	P+LP+VUS_H+D	0.001	1	62597568	Cholesterol	AFR__AMR__CSA__EAS__EUR__OTH	0.97357	-	------	-0.483796	1.61222e-79	0.00209919	460677	1932.09	1				QT
B	ANGPTL3	P+LP+VUS_H+D	0.01	1	62597568	Cholesterol	AFR__AMR__CSA__EAS__EUR__OTH	0.997683	-	------	-0.483796	1.61222e-79	0.00209919	460677	1932.09	1				QT
F	LDLR	P	0.001	19	11089550	Cholesterol	AFR__AMR__CSA__EAS__EUR__OTH	0.950335	+	++++++	0.820945	1.63801e-79	0.00130346	249693	650.93	0				QT
M	ZNF106	PVS1_S	0.001	15	42417308	FAI	AFR__EUR	0.79363	+	-???+?	57.6803	1.71899e-79	6.0755e-05	181055	22	0				QT
M	ZNF106	PVS1_S	0.01	15	42417308	FAI	AFR__EUR	0.845248	+	-???+?	57.6803	1.71899e-79	6.0755e-05	181055	22	0				QT
F	PCSK9	PVS1_VSSM	0.01	1	55039838	Apolipoprotein_B	AFR__AMR__CSA__EAS__EUR__OTH	0.97542	-	-+----	-0.188641	1.72038e-79	0.00108899	248830	539.95	1				QT
F	LDLR	P	0.01	19	11089550	Cholesterol	AFR__AMR__CSA__EAS__EUR__OTH	0.946953	+	++++++	0.817981	2.42037e-79	0.00130547	249693	651.93	0				QT
B	LDLR	P+LP	0.001	19	11089550	DLP_All	AFR__AMR__CSA__EAS__EUR__OTH	0.98421	+	++++++	3.12342	3.09765e-79	0.0017152	82508	568.22	0	400207	1087.69	0	BT
B	LDLR	P+LP	0.01	19	11089550	DLP_All	AFR__AMR__CSA__EAS__EUR__OTH	1.03856	+	++++++	3.12342	3.09765e-79	0.0017152	82508	568.22	0	400207	1087.69	0	BT
F	APOA5	P+LP+VUS_H+D	0.001	11	116790137	Triglycerides	AFR__CSA__EAS__EUR__OTH	0.97581	+	+?-+++	0.77649	5.2844e-79	0.000816649	249189	407	0				QT
F	APOA5	P+LP+VUS_H+D	0.01	11	116790137	Triglycerides	AFR__CSA__EAS__EUR__OTH	1.04889	+	+?-+++	0.77649	5.2844e-79	0.000816649	249189	407	0				QT
B	LDLR	P+LP	0.001	19	11089550	Pure_hypercholesterolemia	AFR__AMR__CSA__EAS__EUR__OTH	0.973429	+	++++++	3.18024	6.45963e-79	0.0017152	76319	540.22	0	406396	1115.69	0	BT
B	LDLR	P+LP	0.01	19	11089550	Pure_hypercholesterolemia	AFR__AMR__CSA__EAS__EUR__OTH	1.03117	+	++++++	3.18024	6.45963e-79	0.0017152	76319	540.22	0	406396	1115.69	0	BT
B	APOB	PVS1_VSSM	singleton	2	21001742	LDL	AFR__CSA__EAS__EUR__OTH	0.950882	-	-?----	-1.28042	1.48336e-78	0.000176423	459266	162.05	0				QT
B	APOB	PVS1_VSSMP	singleton	2	21001742	LDL	AFR__CSA__EAS__EUR__OTH	0.950882	-	-?----	-1.28042	1.48336e-78	0.000176423	459266	162.05	0				QT
B	PCSK9	D	0.001	1	55039838	Apolipoprotein_B	AFR__CSA__EAS__EUR__OTH	0.985693	-	-?----	-0.103013	1.99825e-78	0.00203039	457807	1855.05	2				QT
M	OR52H1	PVS1_M	0.001	11	5544566	Oestrodiol	EUR	0.728588	+	??+?	639.204	3.09e-78	0.000180897	16584	6	0				QT
B	LDLR	P+LP+VUS_H	0.001	19	11089550	DLP_All	AFR__AMR__CSA__EAS__EUR__OTH	0.98421	+	++++++	2.84013	5.17797e-78	0.00203009	82508	645.22	0	400207	1314.7	0	BT
B	LDLR	P+LP+VUS_H	0.01	19	11089550	DLP_All	AFR__AMR__CSA__EAS__EUR__OTH	1.03856	+	++++++	2.84013	5.17797e-78	0.00203009	82508	645.22	0	400207	1314.7	0	BT
F	LDLR	P+LP	0.001	19	11089550	Cholesterol	AFR__AMR__CSA__EAS__EUR__OTH	0.950335	+	++++++	0.694847	9.32356e-78	0.00178302	249693	890.41	0				QT
B	LCAT	D	0.001	16	67939916	Apolipoprotein_A	AFR__CSA__EUR__OTH	0.675979	-	-?-?--	-0.231668	1.07034e-77	0.00078199	416885	652	0				QT
B	LCAT	D	0.01	16	67939916	Apolipoprotein_A	AFR__CSA__EUR__OTH	0.670867	-	-?-?--	-0.231668	1.07034e-77	0.00078199	416885	652	0				QT
B	APOB	PVS1_VSS	singleton	2	21001742	Apolipoprotein_B	AFR__CSA__EAS__EUR__OTH	0.949966	-	-?----	-0.43602	1.14549e-77	0.000115828	457807	106.05	0				QT
F	LDLR	P+LP	0.01	19	11089550	Cholesterol	AFR__AMR__CSA__EAS__EUR__OTH	0.946953	+	++++++	0.692959	1.25295e-77	0.00178502	249693	891.41	0				QT
M	LMTK2	PVS1_VSS	singleton	7	98107183	Oestrodiol	EUR	0.624107	+	??+?	636.41	1.43269e-77	0.000180897	16584	6	0				QT
M	LMTK2	PVS1_VSS	0.001	7	98107183	Oestrodiol	EUR	0.728588	+	??+?	636.41	1.43269e-77	0.000180897	16584	6	0				QT
M	LMTK2	PVS1_VSS	0.01	7	98107183	Oestrodiol	EUR	0.831645	+	??+?	636.41	1.43269e-77	0.000180897	16584	6	0				QT
B	LDLR	P	0.001	19	11089550	Pure_hypercholesterolemia	AFR__AMR__CSA__EAS__EUR__OTH	0.973429	+	++++++	3.79228	2.09686e-77	0.00123572	76319	418.32	0	406396	774.69	0	BT
B	LDLR	P	0.01	19	11089550	Pure_hypercholesterolemia	AFR__AMR__CSA__EAS__EUR__OTH	1.03117	+	++++++	3.79228	2.09686e-77	0.00123572	76319	418.32	0	406396	774.69	0	BT
M	ABCA1	P+LP	0.001	9	104784318	Apolipoprotein_A	AFR__CSA__EUR__OTH	0.699283	-	-?-?--	-0.293626	2.41028e-77	0.000818352	193682	317	0				QT
M	ABCA1	P+LP	0.01	9	104784318	Apolipoprotein_A	AFR__CSA__EUR__OTH	0.712529	-	-?-?--	-0.293626	2.41028e-77	0.000818352	193682	317	0				QT
M	KANK3	PVS1_S	singleton	19	8322842	FAI	EUR__OTH	0.655588	+	????++	104.15	2.56204e-77	1.35642e-05	184309	5	0				QT
B	LIPC	D	0.01	15	58432041	Apolipoprotein_A	AFR__AMR__CSA__EAS__EUR__OTH	0.670867	+	++++++	0.0857644	2.89653e-77	0.00560167	419314	4679.72	9				QT
M	RRP1	PVS1_VSS	singleton	21	43789631	FAI	CSA__EUR__OTH	0.655588	+	??-?+-	74.7309	4.4519e-77	4.24142e-05	188616	16	0				QT
M	ABCA1	P+LP+VUS_H+D	0.01	9	104784318	Apolipoprotein_A	AFR__AMR__CSA__EAS__EUR__OTH	0.712529	-	------	-0.0775189	7.65748e-77	0.0115992	194474	4495.47	8				QT
B	SHBG	P+LP+VUS_H	0.001	17	7630196	Testosterone	AFR__CSA__EAS__EUR__OTH	0.985622	-	-?----	-1.72057	8.28688e-77	0.00102099	416752	851	0				QT
B	LDLR	P+LP+VUS_H	0.001	19	11089550	Pure_hypercholesterolemia	AFR__AMR__CSA__EAS__EUR__OTH	0.973429	+	++++++	2.87099	8.51216e-77	0.00203009	76319	611.22	0	406396	1348.7	0	BT
B	LDLR	P+LP+VUS_H	0.01	19	11089550	Pure_hypercholesterolemia	AFR__AMR__CSA__EAS__EUR__OTH	1.03117	+	++++++	2.87099	8.51216e-77	0.00203009	76319	611.22	0	406396	1348.7	0	BT
M	AQR	PVS1_S	singleton	15	34856798	FAI	EAS__EUR	0.655588	+	???-+?	89.6584	1.81379e-76	2.51707e-05	178779	9	0				QT
B	SHBG	P+LP+VUS_H	0.01	17	7630196	Testosterone	AFR__AMR__CSA__EAS__EUR__OTH	1.02436	-	-+----	-1.71119	2.51737e-76	0.00102104	417221	852	0				QT
M	C2orf81	D	singleton	2	74414338	Oestrodiol	EUR	0.624107	+	??+?	630.4	3.54131e-76	0.000180897	16584	6	0				QT
M	C2orf81	D	0.001	2	74414338	Oestrodiol	EUR	0.728588	+	??+?	630.4	3.54131e-76	0.000180897	16584	6	0				QT
M	C2orf81	D	0.01	2	74414338	Oestrodiol	EUR	0.831645	+	??+?	630.4	3.54131e-76	0.000180897	16584	6	0				QT
M	PCSK9	PVS1_VSSMP	0.01	1	55039838	Apolipoprotein_B	AFR__CSA__EAS__EUR__OTH	0.984477	-	-?----	-0.230175	3.88171e-76	0.000907935	209339	380.13	0				QT
F	PTP4A1	P+LP+VUS_H	singleton	6	63576887	FAI	EUR	0.74068	+	????+?	18.1504	4.0581e-76	1.43098e-05	174705	5	0				QT
F	PTP4A1	P+LP+VUS_H	0.001	6	63576887	FAI	EUR	0.860216	+	????+?	18.1504	4.0581e-76	1.43098e-05	174705	5	0				QT
F	PTP4A1	P+LP+VUS_H	0.01	6	63576887	FAI	EUR	0.940317	+	????+?	18.1504	4.0581e-76	1.43098e-05	174705	5	0				QT
B	APOB	P+LP+VUS_H+D	0.001	2	21001742	LDL	AFR__AMR__CSA__EAS__EUR__OTH	0.994287	-	-+----	-0.185696	6.42803e-76	0.00802838	459814	7379.12	2				QT
B	ABCA1	P	0.001	9	104784318	HDL	AFR__CSA__EUR__OTH	0.810108	-	-?-?--	-0.35971	1.95803e-75	0.000450886	419175	378	0				QT
B	ABCA1	P	0.01	9	104784318	HDL	AFR__CSA__EUR__OTH	0.86135	-	-?-?--	-0.35971	1.95803e-75	0.000450886	419175	378	0				QT
F	PCSK9	PVS1_VSS	0.001	1	55039838	LDL	AFR__CSA__EAS__EUR__OTH	0.970828	-	-?----	-0.773555	4.08318e-75	0.000817423	248919	406.94	0				QT
B	APOC3	P+LP+VUS_H+D	0.001	11	116830568	Triglycerides	AFR__AMR__CSA__EAS__EUR__OTH	1.02602	-	-+----	-0.667555	4.70978e-75	0.000761445	460309	697	2				QT
B	APOC3	P+LP+VUS_H+D	0.01	11	116830568	Triglycerides	AFR__AMR__CSA__EAS__EUR__OTH	1.05552	-	-+----	-0.667555	4.70978e-75	0.000761445	460309	697	2				QT
F	PCSK9	PVS1_VSS	0.01	1	55039838	LDL	AFR__AMR__CSA__EAS__EUR__OTH	0.979688	-	------	-0.737617	4.86682e-75	0.000892448	249283	444.94	0				QT
F	PKD1	P+LP+VUS_H	singleton	16	2089733	eGFR	AFR__CSA__EAS__EUR__OTH	0.864137	-	-?-+-+	-19.8724	6.12714e-75	0.00026997	249218	134.56	0				QT
B	APOB	P+LP+VUS_H	singleton	2	21001742	Apolipoprotein_B	AFR__CSA__EAS__EUR__OTH	0.949966	-	-?----	-0.420874	1.14518e-74	0.000119104	457807	109.05	0				QT
M	PCSK9	PVS1_VSSM	0.01	1	55039838	Apolipoprotein_B	AFR__CSA__EAS__EUR__OTH	0.984477	-	-?----	-0.229456	1.80634e-74	0.000893604	209339	374.13	0				QT
M	RRP1	PVS1_VSSM	singleton	21	43789631	FAI	AFR__CSA__EUR__OTH	0.655588	+	+?-?+-	70.4236	2.36445e-74	4.43864e-05	191500	17	0				QT
M	RRP1	PVS1_VSSMP	singleton	21	43789631	FAI	AFR__CSA__EUR__OTH	0.655588	+	+?-?+-	70.4236	2.36445e-74	4.43864e-05	191500	17	0				QT
F	LDLR	D	0.001	19	11089550	Cholesterol	AFR__AMR__CSA__EAS__EUR__OTH	0.950335	+	++++++	0.686017	2.57479e-74	0.00173109	249693	864.48	0				QT
B	GCK	D	0.001	7	44145154	HbA1c	AFR__AMR__CSA__EAS__EUR__OTH	0.94188	+	+-++++	6.35367	3.28237e-74	0.000383054	459465	352	0				QT
B	GCK	D	0.01	7	44145154	HbA1c	AFR__AMR__CSA__EAS__EUR__OTH	0.968316	+	+-++++	6.35367	3.28237e-74	0.000383054	459465	352	0				QT
F	LDLR	D	0.01	19	11089550	Cholesterol	AFR__AMR__CSA__EAS__EUR__OTH	0.946953	+	++++++	0.684108	3.45748e-74	0.00173309	249693	865.48	0				QT
M	HOXC13	D	0.01	12	53938908	Oestrodiol	AFR__EUR__OTH	0.831645	+	+?+-	211.039	4.58972e-74	0.000169866	17661	6	0				QT
M	FOXH1	PVS1_M	0.001	8	144474241	FAI	EUR	0.79363	+	????+?	106.828	4.72605e-74	1.68378e-05	178171	6	0				QT
M	FOXH1	PVS1_M	0.01	8	144474241	FAI	EUR	0.845248	+	????+?	106.828	4.72605e-74	1.68378e-05	178171	6	0				QT
B	ZDHHC6	PVS1_S	singleton	10	112430810	FAI	EUR__OTH	0.642733	+	????-+	56.631	6.05268e-74	1.09592e-05	364989	8	0				QT
B	APOB	P+LP	singleton	2	21001742	Apolipoprotein_B	AFR__CSA__EAS__EUR__OTH	0.949966	-	-?----	-0.447175	7.13059e-74	0.000104906	457807	96.05	0				QT
F	APOB	PVS1_VSS	0.001	2	21001742	LDL	AFR__CSA__EAS__EUR__OTH	0.970828	-	-?----	-0.635009	1.53416e-73	0.00138373	248919	688.87	0				QT
F	APOB	PVS1_VSS	0.01	2	21001742	LDL	AFR__CSA__EAS__EUR__OTH	0.979688	-	-?----	-0.635009	1.53416e-73	0.00138373	248919	688.87	0				QT
M	TAF6L	P+LP+VUS_H	0.001	11	62775784	Oestrodiol	EUR	0.728588	+	??+?	619.071	1.65074e-73	0.000180897	16584	6	0				QT
M	TAF6L	P+LP+VUS_H	0.01	11	62775784	Oestrodiol	EUR	0.831645	+	??+?	619.071	1.65074e-73	0.000180897	16584	6	0				QT
B	GLRA2	P+LP	0.001	23	14530066	FAI	CSA__EUR__OTH	0.817638	+	??-?+-	16.7687	1.93576e-73	0.000154472	372236	25	45				QT
B	GLRA2	P+LP	0.01	23	14530066	FAI	CSA__EUR__OTH	0.864406	+	??-?+-	16.7687	1.93576e-73	0.000154472	372236	25	45				QT
M	PCSK9	PVS1_VSSMP	0.001	1	55039838	Apolipoprotein_B	AFR__CSA__EAS__EUR__OTH	0.961118	-	-?----	-0.2333	3.4078e-73	0.000843446	209339	353.13	0				QT
B	APOB	PVS1_VSS	singleton	2	21001742	Cholesterol	AFR__CSA__EAS__EUR__OTH	0.952459	-	-?----	-1.74391	3.9759e-73	0.000152184	460129	140.05	0				QT
M	SHBG	P+LP+VUS_H	0.001	17	7630196	Testosterone	AFR__CSA__EUR__OTH	0.945397	-	-?-?--	-3.20858	4.68366e-73	0.00106672	208114	444	0				QT
M	SHBG	P+LP+VUS_H	0.01	17	7630196	Testosterone	AFR__CSA__EUR__OTH	1.00893	-	-?-?--	-3.20858	4.68366e-73	0.00106672	208114	444	0				QT
M	LPA	P+LP+VUS_H+D	0.01	6	160531735	Lipoprotein_A	AFR__AMR__CSA__EAS__EUR__OTH	0.961592	-	---+--	-10.5297	6.01386e-73	0.0209286	168168	6941.04	49				QT
B	RMDN3	D	singleton	15	40736544	FAI	AFR__CSA__EAS__EUR__OTH	0.642733	+	-?--++	34.4201	6.2933e-73	4.33956e-05	380223	33	0				QT
M	TTC38	PVS1_M	singleton	22	46268040	FAI	CSA__EUR__OTH	0.655588	+	??-?++	104.351	6.30739e-73	1.32544e-05	188616	5	0				QT
B	PCSK9	PVS1_S	0.001	1	55039838	Cholesterol	AFR__EUR__OTH	0.97357	-	-???--	-0.953031	6.88413e-73	0.000510876	449228	459	0				QT
B	PCSK9	PVS1_S	0.01	1	55039838	Cholesterol	AFR__EUR__OTH	0.997683	-	-???--	-0.953031	6.88413e-73	0.000510876	449228	459	0				QT
F	ABCA1	P+LP+VUS_H+D	0.01	9	104784318	Apolipoprotein_A	AFR__AMR__CSA__EAS__EUR__OTH	0.651155	-	------	-0.0855655	6.90775e-73	0.0117856	224840	5281.75	9				QT
B	APOB	P+LP	singleton	2	21001742	Cholesterol	AFR__CSA__EAS__EUR__OTH	0.952459	-	-?----	-1.79779	4.3341e-72	0.000141317	460129	130.05	0				QT
F	APOB	PVS1_VSS	singleton	2	21001742	LDL	AFR__CSA__EAS__EUR__OTH	0.929083	-	-?----	-1.45217	9.91017e-72	0.000226415	248919	112.72	0				QT
F	APOB	P+LP+VUS_H	singleton	2	21001742	LDL	AFR__CSA__EAS__EUR__OTH	0.929083	-	-?----	-1.43148	1.10889e-71	0.000232441	248919	115.72	0				QT
M	PCSK9	PVS1_VSSM	0.001	1	55039838	Apolipoprotein_B	AFR__CSA__EAS__EUR__OTH	0.961118	-	-?----	-0.232585	1.61557e-71	0.000829116	209339	347.13	0				QT
B	APOB	P+LP	0.001	2	21001742	Cholesterol	AFR__AMR__CSA__EAS__EUR__OTH	0.97357	-	-+----	-0.465479	2.24946e-71	0.00203515	460677	1873.1	1				QT
B	APOB	P+LP	0.01	2	21001742	Cholesterol	AFR__AMR__CSA__EAS__EUR__OTH	0.997683	-	-+----	-0.465479	2.24946e-71	0.00203515	460677	1873.1	1				QT
M	APOL3	P+LP+VUS_H	singleton	22	36141200	Oestrodiol	CSA__EUR__OTH	0.624107	+	?-++	103.911	6.1385e-71	0.00017001	17646	6	0				QT
M	APOL3	P+LP+VUS_H	0.01	22	36141200	Oestrodiol	CSA__EUR__OTH	0.831645	+	?-++	103.911	6.1385e-71	0.00017001	17646	6	0				QT
M	APOL3	PVS1_S	singleton	22	36141200	Oestrodiol	CSA__EUR__OTH	0.624107	+	?-++	103.911	6.1385e-71	0.00017001	17646	6	0				QT
M	APOL3	PVS1_S	0.01	22	36141200	Oestrodiol	CSA__EUR__OTH	0.831645	+	?-++	103.911	6.1385e-71	0.00017001	17646	6	0				QT
M	APOL3	PVS1_VSS	singleton	22	36141200	Oestrodiol	CSA__EUR__OTH	0.624107	+	?-++	103.911	6.1385e-71	0.00017001	17646	6	0				QT
M	APOL3	PVS1_VSS	0.01	22	36141200	Oestrodiol	CSA__EUR__OTH	0.831645	+	?-++	103.911	6.1385e-71	0.00017001	17646	6	0				QT
M	APOL3	PVS1_VSSM	singleton	22	36141200	Oestrodiol	CSA__EUR__OTH	0.624107	+	?-++	103.911	6.1385e-71	0.00017001	17646	6	0				QT
M	APOL3	PVS1_VSSM	0.01	22	36141200	Oestrodiol	CSA__EUR__OTH	0.831645	+	?-++	103.911	6.1385e-71	0.00017001	17646	6	0				QT
M	APOL3	PVS1_VSSMP	singleton	22	36141200	Oestrodiol	CSA__EUR__OTH	0.624107	+	?-++	103.911	6.1385e-71	0.00017001	17646	6	0				QT
M	APOL3	PVS1_VSSMP	0.01	22	36141200	Oestrodiol	CSA__EUR__OTH	0.831645	+	?-++	103.911	6.1385e-71	0.00017001	17646	6	0				QT
B	LPL	P+LP+VUS_H+D	0.001	8	19939442	HDL	AFR__AMR__CSA__EAS__EUR__OTH	0.810108	-	-+----	-0.191971	8.81942e-71	0.00147673	421626	1245.25	0				QT
B	LPL	P+LP+VUS_H+D	0.01	8	19939442	HDL	AFR__AMR__CSA__EAS__EUR__OTH	0.86135	-	-+----	-0.191971	8.81942e-71	0.00147673	421626	1245.25	0				QT
B	LPL	P+LP+VUS_H	0.001	8	19939442	HDL	AFR__CSA__EAS__EUR__OTH	0.810108	-	-?----	-0.201429	1.01848e-70	0.00134909	421119	1136.25	0				QT
B	LPL	P+LP+VUS_H	0.01	8	19939442	HDL	AFR__CSA__EAS__EUR__OTH	0.86135	-	-?----	-0.201429	1.01848e-70	0.00134909	421119	1136.25	0				QT
M	APOA5	PVS1_VSSM	0.001	11	116790137	Triglycerides	CSA__EUR__OTH	1.00585	+	??+?++	1.32111	1.12771e-70	0.000568278	206765	235	0				QT
M	APOA5	PVS1_VSSM	0.01	11	116790137	Triglycerides	CSA__EUR__OTH	1.01197	+	??+?++	1.32111	1.12771e-70	0.000568278	206765	235	0				QT
M	PCSK9	PVS1_VSS	0.01	1	55039838	LDL	AFR__CSA__EAS__EUR__OTH	0.994606	-	-?----	-0.882748	1.55046e-70	0.00071579	210347	301.13	0				QT
B	APOB	P+LP+VUS_H	singleton	2	21001742	Cholesterol	AFR__CSA__EAS__EUR__OTH	0.952459	-	-?----	-1.6923	1.66899e-70	0.000155444	460129	143.05	0				QT
B	APOB	P+LP+VUS_H	0.001	2	21001742	Cholesterol	AFR__AMR__CSA__EAS__EUR__OTH	0.97357	-	-+-+--	-0.455787	1.79822e-70	0.00209949	460677	1932.37	1				QT
B	APOB	P+LP+VUS_H	0.01	2	21001742	Cholesterol	AFR__AMR__CSA__EAS__EUR__OTH	0.997683	-	-+-+--	-0.455787	1.79822e-70	0.00209949	460677	1932.37	1				QT
F	APOB	P+LP	singleton	2	21001742	LDL	AFR__CSA__EAS__EUR__OTH	0.929083	-	-?----	-1.46642	1.96712e-70	0.00021838	248919	108.72	0				QT
M	ABCA1	P+LP+VUS_H+D	0.01	9	104784318	HDL	AFR__AMR__CSA__EAS__EUR__OTH	0.863301	-	------	-0.0884174	2.28285e-70	0.0115875	194764	4497.64	8				QT
M	APOA5	PVS1_VSSMP	0.001	11	116790137	Triglycerides	CSA__EUR__OTH	1.00585	+	??+?++	1.31288	4.1238e-70	0.000570696	206765	236	0				QT
M	APOA5	PVS1_VSSMP	0.01	11	116790137	Triglycerides	CSA__EUR__OTH	1.01197	+	??+?++	1.31288	4.1238e-70	0.000570696	206765	236	0				QT
B	RRP1	PVS1_VSS	singleton	21	43789631	FAI	CSA__EUR__OTH	0.642733	+	??-?+-	37.7869	4.54624e-70	3.89538e-05	372236	29	0				QT
B	RRP1	PVS1_VSSM	singleton	21	43789631	FAI	CSA__EUR__OTH	0.642733	+	??-?+-	37.7869	4.54624e-70	3.89538e-05	372236	29	0				QT
B	RRP1	PVS1_VSSMP	singleton	21	43789631	FAI	CSA__EUR__OTH	0.642733	+	??-?+-	37.7869	4.54624e-70	3.89538e-05	372236	29	0				QT
M	PIGL	P+LP+VUS_H	singleton	17	16217227	FAI	CSA__EUR__OTH	0.655588	+	??+?++	56.7646	4.70041e-70	5.83195e-05	188616	22	0				QT
F	APOA5	PVS1_S	0.001	11	116790137	Triglycerides	CSA__EAS__EUR__OTH	0.97581	+	??-+++	0.949766	5.89248e-70	0.000492034	244902	241	0				QT
F	APOA5	PVS1_S	0.01	11	116790137	Triglycerides	CSA__EAS__EUR__OTH	1.04889	+	??-+++	0.949766	5.89248e-70	0.000492034	244902	241	0				QT
F	APOA5	P+LP	0.001	11	116790137	Triglycerides	EUR	0.97581	+	????+?	0.995008	6.58783e-70	0.000471176	231336	218	0				QT
F	APOA5	P+LP	0.01	11	116790137	Triglycerides	EUR	1.04889	+	????+?	0.995008	6.58783e-70	0.000471176	231336	218	0				QT
B	SHBG	PVS1_VSS	0.001	17	7630196	Testosterone	AFR__CSA__EAS__EUR__OTH	0.985622	-	-?----	-1.69785	6.86793e-70	0.000951405	416752	793	0				QT
B	SHBG	PVS1_VSS	0.01	17	7630196	Testosterone	AFR__CSA__EAS__EUR__OTH	1.02436	-	-?----	-1.69785	6.86793e-70	0.000951405	416752	793	0				QT
F	PPP1R37	PVS1_P	0.001	19	45093326	HbA1c	EUR	0.921872	+	????+?	38.1472	7.83905e-70	1.51109e-05	231621	7	0				QT
F	PPP1R37	PVS1_P	0.01	19	45093326	HbA1c	EUR	0.924101	+	????+?	38.1472	7.83905e-70	1.51109e-05	231621	7	0				QT
F	LDLR	D	0.001	19	11089550	Apolipoprotein_B	AFR__AMR__CSA__EAS__EUR__OTH	0.986638	+	++++++	0.143012	9.3813e-70	0.00168284	248830	837.48	0				QT
B	ABCA1	P	0.001	9	104784318	Apolipoprotein_A	AFR__CSA__EUR__OTH	0.675979	-	-?-?--	-0.286876	9.95633e-70	0.000453362	416885	378	0				QT
B	ABCA1	P	0.01	9	104784318	Apolipoprotein_A	AFR__CSA__EUR__OTH	0.670867	-	-?-?--	-0.286876	9.95633e-70	0.000453362	416885	378	0				QT
B	SHBG	PVS1_VSSM	0.001	17	7630196	Testosterone	AFR__CSA__EAS__EUR__OTH	0.985622	-	-?----	-1.68738	1.41942e-69	0.000957404	416752	798	0				QT
B	SHBG	PVS1_VSSM	0.01	17	7630196	Testosterone	AFR__CSA__EAS__EUR__OTH	1.02436	-	-?----	-1.68738	1.41942e-69	0.000957404	416752	798	0				QT
B	SHBG	PVS1_VSSMP	0.001	17	7630196	Testosterone	AFR__CSA__EAS__EUR__OTH	0.985622	-	-?----	-1.68738	1.41942e-69	0.000957404	416752	798	0				QT
B	SHBG	PVS1_VSSMP	0.01	17	7630196	Testosterone	AFR__CSA__EAS__EUR__OTH	1.02436	-	-?----	-1.68738	1.41942e-69	0.000957404	416752	798	0				QT
B	APOB	PVS1_VS	singleton	2	21001742	Apolipoprotein_B	AFR__CSA__EAS__EUR__OTH	0.949966	-	-?----	-0.445613	1.54509e-69	9.94454e-05	457807	91.05	0				QT
F	LDLR	D	0.01	19	11089550	Apolipoprotein_B	AFR__AMR__CSA__EAS__EUR__OTH	0.97542	+	++++++	0.142398	1.57764e-69	0.00168485	248830	838.48	0				QT
M	APOA5	P+LP+VUS_H	0.001	11	116790137	Triglycerides	CSA__EUR__OTH	1.00585	+	??+?++	1.32236	1.91054e-69	0.000556187	206765	230	0				QT
M	APOA5	P+LP+VUS_H	0.01	11	116790137	Triglycerides	CSA__EUR__OTH	1.01197	+	??+?++	1.32236	1.91054e-69	0.000556187	206765	230	0				QT
F	PCSK9	PVS1_VSS	0.001	1	55039838	Apolipoprotein_B	AFR__CSA__EAS__EUR__OTH	0.986638	-	-?----	-0.204539	2.98022e-69	0.000802817	248468	398.95	0				QT
F	PCSK9	P+LP+VUS_H+D	0.001	1	55039838	Cholesterol	AFR__CSA__EAS__EUR__OTH	0.950335	-	-?----	-0.530764	3.40293e-69	0.00268892	249329	1340.85	0				QT
F	PCSK9	D	0.01	1	55039838	LDL	AFR__AMR__CSA__EAS__EUR__OTH	0.979688	-	------	-0.356624	5.89829e-69	0.00345076	249283	1718.43	1				QT
B	ABCA1	P+LP+VUS_H	0.001	9	104784318	Cholesterol	AFR__AMR__CSA__EAS__EUR__OTH	0.97357	-	-+----	-0.508246	8.13081e-69	0.00164977	460677	1520.02	0				QT
B	ABCA1	P+LP+VUS_H	0.01	9	104784318	Cholesterol	AFR__AMR__CSA__EAS__EUR__OTH	0.997683	-	-+----	-0.508246	8.13081e-69	0.00164977	460677	1520.02	0				QT
F	ABCA1	D	0.001	9	104784318	HDL	AFR__AMR__CSA__EAS__EUR__OTH	0.821987	-	-+----	-0.143501	1.00798e-68	0.00575378	226862	2604.63	3				QT
M	APOA5	PVS1_VSS	0.001	11	116790137	Triglycerides	CSA__EUR__OTH	1.00585	+	??+?++	1.32361	1.09488e-68	0.000548932	206765	227	0				QT
M	APOA5	PVS1_VSS	0.01	11	116790137	Triglycerides	CSA__EUR__OTH	1.01197	+	??+?++	1.32361	1.09488e-68	0.000548932	206765	227	0				QT
M	APOB	PVS1_VSS	singleton	2	21001742	LDL	AFR__CSA__EAS__EUR__OTH	0.973515	-	-?----	-1.66923	1.44853e-68	0.000192539	210347	81	0				QT
F	APOB	PVS1_VS	singleton	2	21001742	LDL	AFR__CSA__EAS__EUR__OTH	0.929083	-	-?----	-1.47992	1.96466e-68	0.000208337	248919	103.72	0				QT
M	C14orf119	PVS1_S	singleton	14	23097656	FAI	EUR__OTH	0.655588	+	????-+	96.2187	1.9808e-68	1.35642e-05	184309	5	0				QT
M	C14orf119	PVS1_VSS	singleton	14	23097656	FAI	EUR__OTH	0.655588	+	????-+	96.2187	1.9808e-68	1.35642e-05	184309	5	0				QT
B	LHFPL6	PVS1_VSSM	singleton	13	39343939	HbA1c	EUR__OTH	0.826782	+	????+-	53.0217	2.56424e-68	5.65921e-06	441758	5	0				QT
B	LHFPL6	PVS1_VSSMP	singleton	13	39343939	HbA1c	EUR__OTH	0.826782	+	????+-	53.0217	2.56424e-68	5.65921e-06	441758	5	0				QT
M	LMTK2	PVS1_VSSM	singleton	7	98107183	Oestrodiol	EUR	0.624107	+	??+?	551.914	2.70776e-68	0.000211047	16584	7	0				QT
M	LMTK2	PVS1_VSSM	0.001	7	98107183	Oestrodiol	EUR	0.728588	+	??+?	551.914	2.70776e-68	0.000211047	16584	7	0				QT
M	LMTK2	PVS1_VSSM	0.01	7	98107183	Oestrodiol	EUR	0.831645	+	??+?	551.914	2.70776e-68	0.000211047	16584	7	0				QT
M	LMTK2	PVS1_VSSMP	singleton	7	98107183	Oestrodiol	EUR	0.624107	+	??+?	551.914	2.70776e-68	0.000211047	16584	7	0				QT
M	LMTK2	PVS1_VSSMP	0.001	7	98107183	Oestrodiol	EUR	0.728588	+	??+?	551.914	2.70776e-68	0.000211047	16584	7	0				QT
M	LMTK2	PVS1_VSSMP	0.01	7	98107183	Oestrodiol	EUR	0.831645	+	??+?	551.914	2.70776e-68	0.000211047	16584	7	0				QT
M	PCSK9	P+LP+VUS_H+D	0.001	1	55039838	Cholesterol	AFR__CSA__EAS__EUR__OTH	0.949009	-	-?----	-0.586356	3.00943e-68	0.00270466	210800	1138.29	1				QT
B	SLC22A2	P+LP	0.01	6	160217441	eGFR	AFR__CSA__EAS__EUR__OTH	0.940088	-	-?-+--	-6.03545	3.16845e-68	0.00139704	459902	1277	4				QT
B	SLC22A2	PVS1_VS	0.01	6	160217441	eGFR	AFR__CSA__EAS__EUR__OTH	0.940088	-	-?-+--	-6.01797	3.4171e-68	0.00140356	459902	1281	5				QT
M	PKD1	P+LP	singleton	16	2089733	eGFR	AFR__CSA__EAS__EUR__OTH	0.879692	-	-?-+--	-24.9502	5.53392e-68	0.000173245	210684	73	0				QT
M	STIM1	PVS1_VS	singleton	11	3856279	FAI	EUR__OTH	0.655588	+	????++	99.3176	6.76217e-68	1.89898e-05	184309	7	0				QT
B	SLC22A2	PVS1_VSSM	0.01	6	160217441	eGFR	AFR__CSA__EAS__EUR__OTH	0.940088	-	-?-+--	-5.9134	6.76457e-68	0.00144705	459902	1321	5				QT
B	SLC22A2	PVS1_VSSMP	0.01	6	160217441	eGFR	AFR__CSA__EAS__EUR__OTH	0.940088	-	-?-+--	-5.9134	6.76457e-68	0.00144705	459902	1321	5				QT
B	SLC22A2	PVS1_VSS	0.01	6	160217441	eGFR	AFR__CSA__EAS__EUR__OTH	0.940088	-	-?-+--	-5.95042	7.02469e-68	0.00142857	459902	1304	5				QT
M	ABCA1	P+LP	0.001	9	104784318	HDL	AFR__CSA__EUR__OTH	0.840479	-	-?-?--	-0.327402	8.44498e-68	0.000823831	193970	319.6	0				QT
M	ABCA1	P+LP	0.01	9	104784318	HDL	AFR__CSA__EUR__OTH	0.863301	-	-?-?--	-0.327402	8.44498e-68	0.000823831	193970	319.6	0				QT
F	PCSK9	PVS1_VSS	0.01	1	55039838	Apolipoprotein_B	AFR__AMR__CSA__EAS__EUR__OTH	0.97542	-	-+----	-0.193731	1.59921e-67	0.000871978	248830	433.95	0				QT
M	PCSK9	PVS1_VSS	0.001	1	55039838	LDL	AFR__CSA__EAS__EUR__OTH	0.972585	-	-?----	-0.901165	1.68945e-67	0.000653987	210347	275.13	0				QT
B	APOB	PVS1_VS	singleton	2	21001742	Cholesterol	AFR__CSA__EAS__EUR__OTH	0.952459	-	-?----	-1.78731	1.78503e-67	0.000133711	460129	123.05	0				QT
F	PCSK9	PVS1_VSSMP	0.01	1	55039838	Cholesterol	AFR__AMR__CSA__EAS__EUR__OTH	0.946953	-	-+----	-0.808507	3.18638e-67	0.00111926	249693	556.94	1				QT
F	SHBG	P+LP+VUS_H	0.01	17	7630196	FAI	AFR__AMR__CSA__EAS__EUR__OTH	0.940317	+	+++-++	1.99169	3.22838e-67	0.000976785	188373	368	0				QT
F	PCSK9	PVS1_VSSMP	0.001	1	55039838	Cholesterol	AFR__CSA__EAS__EUR__OTH	0.950335	-	-?----	-0.838903	3.78989e-67	0.00104469	249329	518.94	1				QT
F	SHBG	P+LP+VUS_H	0.001	17	7630196	FAI	AFR__CSA__EAS__EUR__OTH	0.860216	+	+?+-++	1.99579	4.09724e-67	0.000975467	188115	367	0				QT
F	APOB	PVS1_VSSM	0.001	2	21001742	LDL	AFR__CSA__EAS__EUR__OTH	0.970828	-	-?----	-0.572748	4.16597e-67	0.00154443	248919	768.87	0				QT
F	APOB	PVS1_VSSM	0.01	2	21001742	LDL	AFR__CSA__EAS__EUR__OTH	0.979688	-	-?----	-0.572748	4.16597e-67	0.00154443	248919	768.87	0				QT
F	APOB	PVS1_VSSMP	0.001	2	21001742	LDL	AFR__CSA__EAS__EUR__OTH	0.970828	-	-?----	-0.572748	4.16597e-67	0.00154443	248919	768.87	0				QT
F	APOB	PVS1_VSSMP	0.01	2	21001742	LDL	AFR__CSA__EAS__EUR__OTH	0.979688	-	-?----	-0.572748	4.16597e-67	0.00154443	248919	768.87	0				QT
M	PKD1	PVS1_VSSM	singleton	16	2089733	eGFR	AFR__CSA__EUR__OTH	0.879692	-	-?-?--	-26.0398	4.23926e-67	0.000159517	210009	67	0				QT
M	PKD1	PVS1_VSSMP	singleton	16	2089733	eGFR	AFR__CSA__EUR__OTH	0.879692	-	-?-?--	-26.0398	4.23926e-67	0.000159517	210009	67	0				QT
M	CEP57	D	0.001	11	95790699	Oestrodiol	EUR__OTH	0.728588	+	??++	473.902	7.91896e-67	0.000203607	17190	7	0				QT
M	HOXC13	P+LP+VUS_H+D	singleton	12	53938908	Oestrodiol	AFR__EUR	0.624107	+	+?+?	222.861	8.25161e-67	0.000205218	17055	7	0				QT
B	LCAT	P+LP	0.001	16	67939916	HDL	AFR__CSA__EAS__EUR__OTH	0.810108	-	-?----	-0.397948	8.66874e-67	0.000332599	421119	280.13	0				QT
B	LCAT	P+LP	0.01	16	67939916	HDL	AFR__CSA__EAS__EUR__OTH	0.86135	-	-?----	-0.397948	8.66874e-67	0.000332599	421119	280.13	0				QT
F	GCK	P+LP+VUS_H	0.001	7	44145154	HbA1c	AFR__CSA__EAS__EUR__OTH	0.921872	+	+?++++	7.21072	1.00578e-66	0.000391867	248809	195	0				QT
F	GCK	P+LP+VUS_H	0.01	7	44145154	HbA1c	AFR__CSA__EAS__EUR__OTH	0.924101	+	+?++++	7.21072	1.00578e-66	0.000391867	248809	195	0				QT
M	PCSK9	PVS1_VSSMP	0.01	1	55039838	Cholesterol	AFR__CSA__EAS__EUR__OTH	0.993414	-	-?-+--	-0.994733	1.04909e-66	0.000930091	210800	392.13	0				QT
B	LYN	P+LP+VUS_H	singleton	8	55880105	FAI	AFR__AMR__CSA__EUR__OTH	0.642733	+	-+-?+-	27.3681	1.10097e-66	6.20272e-05	378866	47	0				QT
B	APOA5	P	0.001	11	116790137	Triglycerides	EUR	1.02602	+	????+?	1.08728	1.10837e-66	0.000285941	426661	244	0				QT
B	APOA5	P	0.01	11	116790137	Triglycerides	EUR	1.05552	+	????+?	1.08728	1.10837e-66	0.000285941	426661	244	0				QT
F	PCSK9	P+LP+VUS_H	0.01	1	55039838	LDL	AFR__AMR__CSA__EAS__EUR__OTH	0.979688	-	------	-0.499315	1.18191e-66	0.00172664	249283	860.84	0				QT
F	PCSK9	PVS1_VSSM	0.01	1	55039838	Cholesterol	AFR__AMR__CSA__EAS__EUR__OTH	0.946953	-	-+----	-0.804699	2.24694e-66	0.00111525	249693	554.94	1				QT
B	LPL	P+LP	0.001	8	19939442	HDL	AFR__CSA__EAS__EUR__OTH	0.810108	-	-?----	-0.211211	2.5775e-66	0.00114843	421119	967.25	0				QT
B	LPL	P+LP	0.01	8	19939442	HDL	AFR__CSA__EAS__EUR__OTH	0.86135	-	-?----	-0.211211	2.5775e-66	0.00114843	421119	967.25	0				QT
F	PCSK9	PVS1_VSSM	0.001	1	55039838	Cholesterol	AFR__CSA__EAS__EUR__OTH	0.950335	-	-?----	-0.834927	2.80423e-66	0.00104068	249329	516.94	1				QT
F	HBB	P+LP	0.001	11	5225487	HbA1c	AFR__CSA__EAS__EUR__OTH	0.921872	-	-?++-+	-4.33756	3.57228e-66	0.000931632	248809	463.6	0				QT
M	SHBG	PVS1_VSS	0.001	17	7630196	Testosterone	CSA__EUR__OTH	0.945397	-	??-?--	-3.15151	4.74948e-66	0.00101214	205012	415	0				QT
M	SHBG	PVS1_VSS	0.01	17	7630196	Testosterone	CSA__EUR__OTH	1.00893	-	??-?--	-3.15151	4.74948e-66	0.00101214	205012	415	0				QT
M	SHBG	PVS1_VSSM	0.001	17	7630196	Testosterone	CSA__EUR__OTH	0.945397	-	??-?--	-3.14692	5.1039e-66	0.00101457	205012	416	0				QT
M	SHBG	PVS1_VSSM	0.01	17	7630196	Testosterone	CSA__EUR__OTH	1.00893	-	??-?--	-3.14692	5.1039e-66	0.00101457	205012	416	0				QT
M	SHBG	PVS1_VSSMP	0.001	17	7630196	Testosterone	CSA__EUR__OTH	0.945397	-	??-?--	-3.14692	5.1039e-66	0.00101457	205012	416	0				QT
M	SHBG	PVS1_VSSMP	0.01	17	7630196	Testosterone	CSA__EUR__OTH	1.00893	-	??-?--	-3.14692	5.1039e-66	0.00101457	205012	416	0				QT
M	PHF20L1	PVS1_VS	0.001	8	132777835	FAI	CSA__EUR__OTH	0.79363	+	??+?+-	44.3159	5.21397e-66	8.74793e-05	188616	33	0				QT
M	PHF20L1	PVS1_VS	0.01	8	132777835	FAI	CSA__EUR__OTH	0.845248	+	??+?+-	44.3159	5.21397e-66	8.74793e-05	188616	33	0				QT
B	PKD1	P+LP	singleton	16	2089733	Chronic_kidney_disease	AFR__CSA__EUR__OTH	1.09196	+	+?+?++	27.0733	5.57691e-66	0.000135447	25141	61	0	454756	69	0	BT
F	PCSK9	P+LP+VUS_H	0.001	1	55039838	LDL	AFR__CSA__EAS__EUR__OTH	0.970828	-	-?----	-0.510311	6.59494e-66	0.00164681	248919	819.84	0				QT
M	PCSK9	PVS1_VSS	0.01	1	55039838	Apolipoprotein_B	AFR__CSA__EAS__EUR__OTH	0.984477	-	-?----	-0.240454	7.99085e-66	0.000702527	209339	294.13	0				QT
M	PCSK9	PVS1_VSSMP	0.001	1	55039838	Cholesterol	AFR__CSA__EAS__EUR__OTH	0.949009	-	-?-+--	-1.02035	1.562e-65	0.00086605	210800	365.13	0				QT
F	LCAT	P+LP+VUS_H+D	0.001	16	67939916	HDL	AFR__CSA__EUR__OTH	0.821987	-	-?-?--	-0.366765	1.70178e-65	0.000861437	225205	388	0				QT
F	LCAT	P+LP+VUS_H+D	0.01	16	67939916	HDL	AFR__CSA__EUR__OTH	0.812249	-	-?-?--	-0.366765	1.70178e-65	0.000861437	225205	388	0				QT
M	APOB	PVS1_VSS	singleton	2	21001742	Apolipoprotein_B	AFR__CSA__EAS__EUR__OTH	0.969294	-	-?----	-0.518374	2.54351e-65	0.000148085	209339	62	0				QT
M	PKD1	PVS1_VS	singleton	16	2089733	eGFR	AFR__EUR__OTH	0.879692	-	-???--	-28.5449	2.64102e-65	0.000129091	205282	53	0				QT
F	LDLR	P+LP+VUS_H+D	0.01	19	11089550	DLP_All	AFR__AMR__CSA__EAS__EUR__OTH	1.03792	+	++++++	3.5461	3.03038e-65	0.00227074	35419	377.39	0	226384	811.58	0	BT
M	IGF1R	PVS1_S	0.001	15	98649583	FAI	EUR__OTH	0.79363	+	????++	85.982	3.76949e-65	1.6277e-05	184309	6	0				QT
M	IGF1R	PVS1_S	0.01	15	98649583	FAI	EUR__OTH	0.845248	+	????++	85.982	3.76949e-65	1.6277e-05	184309	6	0				QT
M	PCSK9	PVS1_VSSM	0.01	1	55039838	Cholesterol	AFR__CSA__EAS__EUR__OTH	0.993414	-	-?-+--	-0.989731	4.67686e-65	0.00091586	210800	386.13	0				QT
F	LDLR	P+LP+VUS_H+D	0.001	19	11089550	DLP_All	AFR__AMR__CSA__EAS__EUR__OTH	1.0103	+	++++++	3.54138	4.87497e-65	0.00226883	35419	376.39	0	226384	811.58	0	BT
F	SHBG	PVS1_VSSM	0.001	17	7630196	FAI	AFR__CSA__EAS__EUR__OTH	0.860216	+	+?++++	2.02736	6.88345e-65	0.000911676	188115	343	0				QT
F	SHBG	PVS1_VSSM	0.01	17	7630196	FAI	AFR__CSA__EAS__EUR__OTH	0.940317	+	+?++++	2.02736	6.88345e-65	0.000911676	188115	343	0				QT
F	SHBG	PVS1_VSSMP	0.001	17	7630196	FAI	AFR__CSA__EAS__EUR__OTH	0.860216	+	+?++++	2.02736	6.88345e-65	0.000911676	188115	343	0				QT
F	SHBG	PVS1_VSSMP	0.01	17	7630196	FAI	AFR__CSA__EAS__EUR__OTH	0.940317	+	+?++++	2.02736	6.88345e-65	0.000911676	188115	343	0				QT
F	ABCA1	D	0.01	9	104784318	HDL	AFR__AMR__CSA__EAS__EUR__OTH	0.812249	-	-+----	-0.0987592	7.99193e-65	0.0113287	226862	5122.1	9				QT
M	PCSK9	D	0.01	1	55039838	LDL	AFR__AMR__CSA__EAS__EUR__OTH	0.994606	-	-+----	-0.376505	1.11185e-64	0.00348922	210531	1465.18	2				QT
B	APOB	P+LP+VUS_H+D	0.001	2	21001742	Apolipoprotein_B	AFR__AMR__CSA__EAS__EUR__OTH	0.985693	-	-+----	-0.0479174	1.71766e-64	0.00772767	458351	7079.97	2				QT
F	SHBG	PVS1_VSS	0.001	17	7630196	FAI	AFR__CSA__EAS__EUR__OTH	0.860216	+	+?+-++	2.03109	2.17703e-64	0.000901045	188115	339	0				QT
F	SHBG	PVS1_VSS	0.01	17	7630196	FAI	AFR__CSA__EAS__EUR__OTH	0.940317	+	+?+-++	2.03109	2.17703e-64	0.000901045	188115	339	0				QT
F	HBB	P+LP	0.01	11	5225487	HbA1c	AFR__CSA__EAS__EUR__OTH	0.924101	-	-?-+-+	-4.25262	2.33336e-64	0.00100398	248809	499.6	0				QT
M	PCSK9	D	0.01	1	55039838	Apolipoprotein_B	AFR__AMR__CSA__EAS__EUR__OTH	0.984477	-	-+----	-0.104898	3.02362e-64	0.00348934	209521	1458.18	2				QT
B	PCSK9	D	0.001	1	55039838	Cholesterol	AFR__CSA__EAS__EUR__OTH	0.97357	-	-?----	-0.440427	3.04753e-64	0.00203753	460129	1871.05	2				QT
B	DKK3	PVS1_VSS	singleton	11	11964474	FAI	AFR__CSA__EUR__OTH	0.642733	+	+?-?+-	43.4803	3.27516e-64	2.51037e-05	378431	19	0				QT
F	LDLR	P	0.01	19	11089550	DLP_All	AFR__AMR__CSA__EAS__EUR__OTH	1.03792	+	++++++	4.93116	4.66865e-64	0.00133465	35419	255.57	0	226384	443.26	0	BT
M	PHF20L1	P+LP	0.001	8	132777835	FAI	CSA__EUR__OTH	0.79363	+	??+?+-	42.9364	4.80353e-64	9.01302e-05	188616	34	0				QT
M	PHF20L1	P+LP	0.01	8	132777835	FAI	CSA__EUR__OTH	0.845248	+	??+?+-	42.9364	4.80353e-64	9.01302e-05	188616	34	0				QT
B	PIGL	P+LP+VUS_H+D	singleton	17	16217227	FAI	AMR__CSA__EUR__OTH	0.642733	+	?-+?++	29.9083	4.94767e-64	5.50083e-05	372671	41	0				QT
M	APOB	PVS1_VS	singleton	2	21001742	LDL	AFR__CSA__EAS__EUR__OTH	0.973515	-	-?----	-1.69533	5.69488e-64	0.000173523	210347	73	0				QT
F	APOB	PVS1_VSSM	singleton	2	21001742	LDL	AFR__CSA__EAS__EUR__OTH	0.929083	-	-?----	-1.28557	5.96002e-64	0.000254537	248919	126.72	0				QT
F	APOB	PVS1_VSSMP	singleton	2	21001742	LDL	AFR__CSA__EAS__EUR__OTH	0.929083	-	-?----	-1.28557	5.96002e-64	0.000254537	248919	126.72	0				QT
F	GCK	P+LP+VUS_H+D	0.001	7	44145154	HbA1c	AFR__CSA__EAS__EUR__OTH	0.921872	+	+?++++	6.2606	7.01466e-64	0.000496365	248809	247	0				QT
F	GCK	P+LP+VUS_H+D	0.01	7	44145154	HbA1c	AFR__CSA__EAS__EUR__OTH	0.924101	+	+?++++	6.2606	7.01466e-64	0.000496365	248809	247	0				QT
M	PCSK9	PVS1_VSSM	0.001	1	55039838	Cholesterol	AFR__CSA__EAS__EUR__OTH	0.949009	-	-?-+--	-1.01542	7.24187e-64	0.000851818	210800	359.13	0				QT
F	PCSK9	D	0.01	1	55039838	Apolipoprotein_B	AFR__AMR__CSA__EAS__EUR__OTH	0.97542	-	------	-0.0942081	7.83801e-64	0.00344097	248830	1710.44	1				QT
F	LDLR	P	0.001	19	11089550	DLP_All	AFR__AMR__CSA__EAS__EUR__OTH	1.0103	+	++++++	4.92302	8.08173e-64	0.00133274	35419	254.57	0	226384	443.26	0	BT
M	OR52H1	PVS1_M	0.01	11	5544566	Oestrodiol	CSA__EUR	0.831645	+	?-+?	180.591	1.03415e-63	0.000205399	17040	7	0				QT
B	ANGPTL3	PVS1_VSSM	0.001	1	62597568	Triglycerides	AFR__AMR__CSA__EAS__EUR__OTH	1.02602	-	------	-0.522868	1.08408e-63	0.00105804	460309	972.05	1				QT
B	ANGPTL3	PVS1_VSSM	0.01	1	62597568	Triglycerides	AFR__AMR__CSA__EAS__EUR__OTH	1.05552	-	------	-0.522868	1.08408e-63	0.00105804	460309	972.05	1				QT
B	ANGPTL3	PVS1_VSSMP	0.001	1	62597568	Triglycerides	AFR__AMR__CSA__EAS__EUR__OTH	1.02602	-	------	-0.522868	1.08408e-63	0.00105804	460309	972.05	1				QT
B	ANGPTL3	PVS1_VSSMP	0.01	1	62597568	Triglycerides	AFR__AMR__CSA__EAS__EUR__OTH	1.05552	-	------	-0.522868	1.08408e-63	0.00105804	460309	972.05	1				QT
F	HBB	P+LP+VUS_H	0.001	11	5225487	HbA1c	AFR__CSA__EAS__EUR__OTH	0.921872	-	-?++-+	-4.0771	1.13931e-63	0.000963785	248809	479.6	0				QT
F	LDLR	P+LP+VUS_H+D	0.01	19	11089550	Pure_hypercholesterolemia	AFR__AMR__CSA__EAS__EUR__OTH	1.02162	+	++++++	3.57365	1.22683e-63	0.00227074	32675	357.39	0	229128	831.58	0	BT
F	PCSK9	P+LP+VUS_H	0.001	1	55039838	Apolipoprotein_B	AFR__CSA__EAS__EUR__OTH	0.986638	-	-?----	-0.137275	1.88374e-63	0.00163774	248468	813.85	0				QT
B	APOB	PVS1_VSSM	singleton	2	21001742	Cholesterol	AFR__CSA__EAS__EUR__OTH	0.952459	-	-?----	-1.50173	2.32867e-63	0.00017609	460129	162.05	0				QT
B	APOB	PVS1_VSSMP	singleton	2	21001742	Cholesterol	AFR__CSA__EAS__EUR__OTH	0.952459	-	-?----	-1.50173	2.32867e-63	0.00017609	460129	162.05	0				QT
F	LDLR	P+LP+VUS_H+D	0.001	19	11089550	Pure_hypercholesterolemia	AFR__AMR__CSA__EAS__EUR__OTH	1.01932	+	++++++	3.56581	2.40907e-63	0.00226883	32675	356.39	0	229128	831.58	0	BT
B	APOB	PVS1_VSS	0.001	2	21001742	Apolipoprotein_B	AFR__CSA__EAS__EUR__OTH	0.985693	-	-?----	-0.143194	3.81471e-63	0.000959727	457807	878.74	0				QT
B	APOB	PVS1_VSS	0.01	2	21001742	Apolipoprotein_B	AFR__CSA__EAS__EUR__OTH	1.03	-	-?----	-0.143194	3.81471e-63	0.000959727	457807	878.74	0				QT
F	PCSK9	P+LP	0.001	1	55039838	LDL	AFR__CSA__EAS__EUR__OTH	0.970828	-	-?----	-0.697211	4.20137e-63	0.000835502	248919	415.94	0				QT
M	RNF128	D	0.01	23	106726914	eGFR	CSA__EAS__EUR__OTH	0.908182	-	??++--	-2.28786	4.2846e-63	0.00970846	207551	0	2015				QT
M	HBB	D	0.001	11	5225487	HbA1c	AFR__AMR__CSA__EUR__OTH	0.906261	-	--+?--	-10.0895	4.74928e-63	0.000457197	209622	191.68	0				QT
M	PCSK9	PVS1_VSS	0.001	1	55039838	Apolipoprotein_B	AFR__CSA__EAS__EUR__OTH	0.961118	-	-?----	-0.245437	5.10764e-63	0.000638038	209339	267.13	0				QT
F	LDLR	P+LP+VUS_H	0.01	19	11089550	DLP_All	AFR__AMR__CSA__EAS__EUR__OTH	1.03792	+	++++++	3.57428	5.47573e-63	0.00215042	35419	358.39	0	226384	767.58	0	BT
B	APOB	P+LP+VUS_H+D	0.001	2	21001742	Cholesterol	AFR__AMR__CSA__EAS__EUR__OTH	0.97357	-	-+----	-0.220863	5.55128e-63	0.00802296	460677	7387.98	2				QT
B	PKD1	P+LP+VUS_H	singleton	16	2089733	Chronic_kidney_disease	AFR__CSA__EAS__EUR__OTH	1.09196	+	+?+-++	17.5371	6.02945e-63	0.000211556	25192	73	0	456953	131	0	BT
F	PCSK9	P+LP+VUS_H	0.01	1	55039838	Apolipoprotein_B	AFR__AMR__CSA__EAS__EUR__OTH	0.97542	-	-+----	-0.133276	7.78511e-63	0.00171172	248830	851.85	0				QT
M	G6PD	P+LP+VUS_H+D	0.01	23	154532012	HbA1c	AFR__AMR__CSA__EAS__EUR__OTH	0.937865	-	-+----	-1.77581	7.83425e-63	0.00647651	210295	0	1361.98				QT
F	LDLR	P+LP+VUS_H	0.001	19	11089550	DLP_All	AFR__AMR__CSA__EAS__EUR__OTH	1.0103	+	++++++	3.5693	8.83321e-63	0.00214851	35419	357.39	0	226384	767.58	0	BT
M	ABCA1	D	0.001	9	104784318	Apolipoprotein_A	AFR__AMR__CSA__EAS__EUR__OTH	0.699283	-	------	-0.0980777	1.08368e-62	0.00586682	194474	2275.89	3				QT
M	G6PD	P+LP	0.01	23	154532012	HbA1c	AFR__AMR__CSA__EAS__EUR__OTH	0.937865	-	-+----	-1.78673	1.11544e-62	0.00641469	210295	0	1348.98				QT
M	G6PD	P+LP+VUS_H	0.01	23	154532012	HbA1c	AFR__AMR__CSA__EAS__EUR__OTH	0.937865	-	-+----	-1.77315	1.18673e-62	0.00647176	210295	0	1360.98				QT
F	PCSK9	P+LP	0.01	1	55039838	LDL	AFR__AMR__CSA__EAS__EUR__OTH	0.979688	-	------	-0.65997	1.25294e-62	0.000916517	249283	456.94	0				QT
F	PKD1	P+LP+VUS_H	0.001	16	2089733	End_stage_renal_disease_CDK_stage_5	AFR__CSA__EUR__OTH	0.973836	+	+++-	172.272	1.3007e-62	0.00124294	614	51.46	0	259269	594.58	0	BT
F	PKD1	P+LP+VUS_H	0.01	16	2089733	End_stage_renal_disease_CDK_stage_5	AFR__CSA__EUR__OTH	0.921931	+	+++-	172.272	1.3007e-62	0.00124294	614	51.46	0	259269	594.58	0	BT
B	ANGPTL3	P+LP+VUS_H	0.001	1	62597568	Triglycerides	AFR__AMR__CSA__EAS__EUR__OTH	1.02602	-	------	-0.522153	1.34833e-62	0.00104174	460309	957.05	1				QT
B	ANGPTL3	P+LP+VUS_H	0.01	1	62597568	Triglycerides	AFR__AMR__CSA__EAS__EUR__OTH	1.05552	-	------	-0.522153	1.34833e-62	0.00104174	460309	957.05	1				QT
M	HBB	D	0.01	11	5225487	HbA1c	AFR__AMR__CSA__EAS__EUR__OTH	0.937865	-	--++--	-9.89279	1.40017e-62	0.000460489	210295	193.68	0				QT
F	HBB	P+LP+VUS_H+D	0.001	11	5225487	HbA1c	AFR__CSA__EAS__EUR__OTH	0.921872	-	-?++-+	-3.86915	2.17061e-62	0.00100599	248809	500.6	0				QT
F	LDLR	P	0.01	19	11089550	Pure_hypercholesterolemia	AFR__AMR__CSA__EAS__EUR__OTH	1.02162	+	++++++	4.94188	2.331e-62	0.00133465	32675	242.57	0	229128	456.26	0	BT
F	GCK	P+LP	0.001	7	44145154	HbA1c	CSA__EAS__EUR__OTH	0.921872	+	??++++	8.58837	2.51865e-62	0.000261114	245104	128	0				QT
F	GCK	P+LP	0.01	7	44145154	HbA1c	CSA__EAS__EUR__OTH	0.924101	+	??++++	8.58837	2.51865e-62	0.000261114	245104	128	0				QT
M	CZIB	PVS1_VSS	0.001	1	53214662	Oestrodiol	EUR	0.728588	+	??+?	440.439	2.57109e-62	0.000301495	16584	10	0				QT
M	CZIB	PVS1_VSSM	0.001	1	53214662	Oestrodiol	EUR	0.728588	+	??+?	440.439	2.57109e-62	0.000301495	16584	10	0				QT
F	LDLR	P+LP	0.01	19	11089550	DLP_All	AFR__AMR__CSA__EAS__EUR__OTH	1.03792	+	++++++	3.90885	3.18304e-62	0.00182131	35419	316.39	0	226384	637.26	0	BT
M	PKD1	PVS1_VSS	singleton	16	2089733	eGFR	AFR__CSA__EUR__OTH	0.879692	-	-?+?--	-26.0792	3.52263e-62	0.000147613	210009	62	0				QT
M	RNF128	P+LP+VUS_H+D	0.01	23	106726914	eGFR	CSA__EAS__EUR__OTH	0.908182	-	??++--	-2.25917	4.09904e-62	0.00979518	207551	0	2033				QT
B	APOB	PVS1_VSSM	singleton	2	21001742	Apolipoprotein_B	AFR__CSA__EAS__EUR__OTH	0.949966	-	-?----	-0.352549	4.31152e-62	0.000139855	457807	128.05	0				QT
B	APOB	PVS1_VSSMP	singleton	2	21001742	Apolipoprotein_B	AFR__CSA__EAS__EUR__OTH	0.949966	-	-?----	-0.352549	4.31152e-62	0.000139855	457807	128.05	0				QT
B	ANGPTL3	PVS1_VSS	0.001	1	62597568	Triglycerides	AFR__AMR__CSA__EAS__EUR__OTH	1.02602	-	------	-0.522283	4.5857e-62	0.00103305	460309	949.05	1				QT
B	ANGPTL3	PVS1_VSS	0.01	1	62597568	Triglycerides	AFR__AMR__CSA__EAS__EUR__OTH	1.05552	-	------	-0.522283	4.5857e-62	0.00103305	460309	949.05	1				QT
B	DKK3	PVS1_VSSM	singleton	11	11964474	FAI	AFR__CSA__EUR__OTH	0.642733	+	+?-?+-	41.5412	4.5962e-62	2.64249e-05	378431	20	0				QT
B	DKK3	PVS1_VSSMP	singleton	11	11964474	FAI	AFR__CSA__EUR__OTH	0.642733	+	+?-?+-	41.5412	4.5962e-62	2.64249e-05	378431	20	0				QT
F	HBB	P+LP+VUS_H	0.01	11	5225487	HbA1c	AFR__CSA__EAS__EUR__OTH	0.924101	-	-?++-+	-4.00657	4.87512e-62	0.00103613	248809	515.6	0				QT
F	LDLR	P	0.001	19	11089550	Pure_hypercholesterolemia	AFR__AMR__CSA__EAS__EUR__OTH	1.01932	+	++++++	4.92693	5.20923e-62	0.00133274	32675	241.57	0	229128	456.26	0	BT
F	LDLR	P+LP	0.001	19	11089550	DLP_All	AFR__AMR__CSA__EAS__EUR__OTH	1.0103	+	++++++	3.90294	5.25014e-62	0.0018194	35419	315.39	0	226384	637.26	0	BT
M	SOD1	P+LP	singleton	21	31659771	HbA1c	AFR__CSA__EUR	0.85299	+	+?-?+?	37.5076	5.80779e-62	3.45188e-05	202788	14	0				QT
B	LCAT	P+LP+VUS_H	0.001	16	67939916	Apolipoprotein_A	AFR__CSA__EAS__EUR__OTH	0.675979	-	-?-+--	-0.252027	7.10045e-62	0.000524262	418810	439.13	0				QT
B	LCAT	P+LP+VUS_H	0.01	16	67939916	Apolipoprotein_A	AFR__CSA__EAS__EUR__OTH	0.670867	-	-?-+--	-0.252027	7.10045e-62	0.000524262	418810	439.13	0				QT
M	PHF20L1	PVS1_VSS	0.001	8	132777835	FAI	CSA__EUR__OTH	0.79363	+	??+?+-	41.5064	8.2008e-62	9.27811e-05	188616	35	0				QT
M	PHF20L1	PVS1_VSS	0.01	8	132777835	FAI	CSA__EUR__OTH	0.845248	+	??+?+-	41.5064	8.2008e-62	9.27811e-05	188616	35	0				QT
F	LDLR	P+LP	0.01	19	11089550	Pure_hypercholesterolemia	AFR__AMR__CSA__EAS__EUR__OTH	1.02162	+	++++++	3.97333	1.10058e-61	0.00182131	32675	301.39	0	229128	652.26	0	BT
B	LPA	P+LP+VUS_H	0.01	6	160531735	Lipoprotein_A	AFR__AMR__CSA__EAS__EUR__OTH	0.947171	-	------	-14.2776	1.50445e-61	0.00450572	368510	3312.81	4				QT
F	LDLR	P+LP+VUS_H	0.01	19	11089550	Pure_hypercholesterolemia	AFR__AMR__CSA__EAS__EUR__OTH	1.02162	+	++++++	3.60913	1.57354e-61	0.00215042	32675	339.39	0	229128	786.58	0	BT
M	SCARB1	P+LP+VUS_H+D	0.001	12	124782684	HDL	AFR__AMR__CSA__EAS__EUR__OTH	0.840479	+	++++++	0.173781	1.61273e-61	0.00262419	194764	1020.19	1				QT
M	SCARB1	P+LP+VUS_H+D	0.01	12	124782684	HDL	AFR__AMR__CSA__EAS__EUR__OTH	0.863301	+	++++++	0.173781	1.61273e-61	0.00262419	194764	1020.19	1				QT
M	APOB	P+LP	singleton	2	21001742	LDL	AFR__CSA__EAS__EUR__OTH	0.973515	-	-?----	-1.63821	1.88186e-61	0.000178277	210347	75	0				QT
B	PKD1	PVS1_VSSM	singleton	16	2089733	Chronic_kidney_disease	AFR__CSA__EAS__EUR__OTH	1.09196	+	+?+-++	27.763	1.92e-61	0.000130668	25192	56	0	456953	70	0	BT
B	PKD1	PVS1_VSSMP	singleton	16	2089733	Chronic_kidney_disease	AFR__CSA__EAS__EUR__OTH	1.09196	+	+?+-++	27.763	1.92e-61	0.000130668	25192	56	0	456953	70	0	BT
M	ABCA1	D	0.001	9	104784318	HDL	AFR__AMR__CSA__EAS__EUR__OTH	0.840479	-	------	-0.115537	2.01998e-61	0.0058632	194764	2277.88	3				QT
F	APOB	P+LP	singleton	2	21001742	Apolipoprotein_B	CSA__EAS__EUR__OTH	0.939563	-	??----	-0.437471	2.15453e-61	0.000165264	244215	80.72	0				QT
F	LDLR	P+LP	0.001	19	11089550	Pure_hypercholesterolemia	AFR__AMR__CSA__EAS__EUR__OTH	1.01932	+	++++++	3.96327	2.26378e-61	0.0018194	32675	300.39	0	229128	652.26	0	BT
F	APOB	PVS1_VSS	singleton	2	21001742	Apolipoprotein_B	CSA__EAS__EUR__OTH	0.939563	-	??----	-0.42837	2.75199e-61	0.000171406	244215	83.72	0				QT
F	APOB	P+LP+VUS_H	singleton	2	21001742	Apolipoprotein_B	CSA__EAS__EUR__OTH	0.939563	-	??----	-0.420239	3.05902e-61	0.000177548	244215	86.72	0				QT
F	LDLR	P+LP+VUS_H	0.001	19	11089550	Pure_hypercholesterolemia	AFR__AMR__CSA__EAS__EUR__OTH	1.01932	+	++++++	3.60083	3.10568e-61	0.00214851	32675	338.39	0	229128	786.58	0	BT
F	LHFPL6	PVS1_VSSM	0.001	13	39343939	HbA1c	EUR	0.921872	+	????+?	35.6191	3.80555e-61	1.51108e-05	231623	7	0				QT
F	LHFPL6	PVS1_VSSM	0.01	13	39343939	HbA1c	EUR	0.924101	+	????+?	35.6191	3.80555e-61	1.51108e-05	231623	7	0				QT
F	LHFPL6	PVS1_VSSMP	0.001	13	39343939	HbA1c	EUR	0.921872	+	????+?	35.6191	3.80555e-61	1.51108e-05	231623	7	0				QT
F	LHFPL6	PVS1_VSSMP	0.01	13	39343939	HbA1c	EUR	0.924101	+	????+?	35.6191	3.80555e-61	1.51108e-05	231623	7	0				QT
M	CEP57	D	singleton	11	95790699	Oestrodiol	AFR__EUR__OTH	0.624107	+	+?++	206.389	4.20371e-61	0.000226488	17661	8	0				QT
M	CEP57	D	0.01	11	95790699	Oestrodiol	AFR__EUR__OTH	0.831645	+	+?++	206.389	4.20371e-61	0.000226488	17661	8	0				QT
M	APOB	P+LP+VUS_H	singleton	2	21001742	LDL	AFR__CSA__EAS__EUR__OTH	0.973515	-	-?----	-1.52551	5.63365e-61	0.000204424	210347	86	0				QT
F	HBB	P+LP+VUS_H+D	0.01	11	5225487	HbA1c	AFR__CSA__EAS__EUR__OTH	0.924101	-	-?++-+	-3.81068	6.69522e-61	0.00107833	248809	536.6	0				QT
F	ABCA1	D	0.001	9	104784318	Apolipoprotein_A	AFR__AMR__CSA__EAS__EUR__OTH	0.661516	-	------	-0.111732	7.01959e-61	0.00577005	224840	2588.67	3				QT
F	GCK	P	0.001	7	44145154	HbA1c	CSA__EUR__OTH	0.921872	+	??+?++	10.4182	8.35384e-61	0.000172384	243642	84	0				QT
F	GCK	P	0.01	7	44145154	HbA1c	CSA__EUR__OTH	0.924101	+	??+?++	10.4182	8.35384e-61	0.000172384	243642	84	0				QT
F	SHBG	PVS1_S	0.001	17	7630196	FAI	EUR__OTH	0.860216	+	????++	2.16087	9.30789e-61	0.000780385	180680	282	0				QT
F	SHBG	PVS1_S	0.01	17	7630196	FAI	EUR__OTH	0.940317	+	????++	2.16087	9.30789e-61	0.000780385	180680	282	0				QT
M	SCYL1	PVS1_M	0.001	11	65525154	FAI	EAS__EUR	0.79363	+	???++?	45.6421	1.03519e-60	7.55122e-05	178779	27	0				QT
M	SCYL1	PVS1_M	0.01	11	65525154	FAI	EAS__EUR	0.845248	+	???++?	45.6421	1.03519e-60	7.55122e-05	178779	27	0				QT
B	ANGPTL3	PVS1_VSSM	0.001	1	62597568	Cholesterol	AFR__AMR__CSA__EAS__EUR__OTH	0.97357	-	------	-0.592456	1.68674e-60	0.00105719	460677	972.05	1				QT
B	ANGPTL3	PVS1_VSSM	0.01	1	62597568	Cholesterol	AFR__AMR__CSA__EAS__EUR__OTH	0.997683	-	------	-0.592456	1.68674e-60	0.00105719	460677	972.05	1				QT
B	ANGPTL3	PVS1_VSSMP	0.001	1	62597568	Cholesterol	AFR__AMR__CSA__EAS__EUR__OTH	0.97357	-	------	-0.592456	1.68674e-60	0.00105719	460677	972.05	1				QT
B	ANGPTL3	PVS1_VSSMP	0.01	1	62597568	Cholesterol	AFR__AMR__CSA__EAS__EUR__OTH	0.997683	-	------	-0.592456	1.68674e-60	0.00105719	460677	972.05	1				QT
B	LPL	D	0.001	8	19939442	HDL	AFR__AMR__CSA__EAS__EUR__OTH	0.810108	-	-+----	-0.189115	1.8871e-60	0.00129024	421626	1088	0				QT
B	LPL	D	0.01	8	19939442	HDL	AFR__AMR__CSA__EAS__EUR__OTH	0.86135	-	-+----	-0.189115	1.8871e-60	0.00129024	421626	1088	0				QT
M	TMEM45B	D	singleton	11	129852483	Oestrodiol	EUR	0.624107	+	??+?	612.974	2.11831e-60	0.000150748	16584	5	0				QT
M	APOB	PVS1_VSS	0.001	2	21001742	LDL	AFR__CSA__EAS__EUR__OTH	0.972585	-	-?----	-0.686094	3.61976e-60	0.00113951	210347	479.39	0				QT
M	APOB	PVS1_VSS	0.01	2	21001742	LDL	AFR__CSA__EAS__EUR__OTH	0.994606	-	-?----	-0.686094	3.61976e-60	0.00113951	210347	479.39	0				QT
B	TAFAZZIN	PVS1_M	0.001	23	154411861	FAI	CSA__EUR__OTH	0.817638	+	??+?++	26.1381	3.8554e-60	5.23861e-05	372236	9	15				QT
B	TAFAZZIN	PVS1_M	0.01	23	154411861	FAI	CSA__EUR__OTH	0.864406	+	??+?++	26.1381	3.8554e-60	5.23861e-05	372236	9	15				QT
B	ANGPTL3	P+LP+VUS_H	0.001	1	62597568	Cholesterol	AFR__AMR__CSA__EAS__EUR__OTH	0.97357	-	------	-0.594483	4.66749e-60	0.00104091	460677	957.05	1				QT
B	ANGPTL3	P+LP+VUS_H	0.01	1	62597568	Cholesterol	AFR__AMR__CSA__EAS__EUR__OTH	0.997683	-	------	-0.594483	4.66749e-60	0.00104091	460677	957.05	1				QT
M	G6PD	P	0.01	23	154532012	HbA1c	AFR__AMR__CSA__EAS__EUR__OTH	0.937865	-	-+----	-3.69193	4.93576e-60	0.00313369	210295	0	659				QT
F	LCAT	D	0.001	16	67939916	HDL	AFR__CSA__EUR__OTH	0.821987	-	-?-?--	-0.367648	7.7534e-60	0.00078151	225205	352	0				QT
F	LCAT	D	0.01	16	67939916	HDL	AFR__CSA__EUR__OTH	0.812249	-	-?-?--	-0.367648	7.7534e-60	0.00078151	225205	352	0				QT
B	PKD1	PVS1_VS	singleton	16	2089733	Chronic_kidney_disease	AFR__CSA__EAS__EUR__OTH	1.09196	+	+?--++	31.8711	8.4665e-60	0.00010889	25192	51	0	456953	54	0	BT
M	CZIB	P+LP+VUS_H	0.001	1	53214662	Oestrodiol	EUR	0.728588	+	??+?	410.747	1.07166e-59	0.000331645	16584	11	0				QT
F	APOB	PVS1_VS	singleton	2	21001742	Apolipoprotein_B	CSA__EAS__EUR__OTH	0.939563	-	??----	-0.442518	1.241e-59	0.000157074	244215	76.72	0				QT
M	APOB	P+LP+VUS_H	singleton	2	21001742	Apolipoprotein_B	AFR__CSA__EAS__EUR__OTH	0.969294	-	-?----	-0.475724	1.27177e-59	0.000160028	209339	67	0				QT
M	RXRG	P+LP+VUS_H	0.001	1	165401278	Oestrodiol	EUR	0.728588	+	??+?	514.285	1.57899e-59	0.000211047	16584	7	0				QT
F	USP33	P+LP	singleton	1	77697352	Testosterone	EUR__OTH	0.721949	+	????+-	2.66212	1.63433e-59	4.25453e-05	199787	17	0				QT
F	USP33	PVS1_VS	singleton	1	77697352	Testosterone	EUR__OTH	0.721949	+	????+-	2.66212	1.63433e-59	4.25453e-05	199787	17	0				QT
M	GLRA2	P+LP	0.001	23	14530066	FAI	CSA__EUR__OTH	0.79363	+	??-?+-	24.5049	1.63826e-59	0.000132544	188616	0	25				QT
M	GLRA2	P+LP	0.01	23	14530066	FAI	CSA__EUR__OTH	0.845248	+	??-?+-	24.5049	1.63826e-59	0.000132544	188616	0	25				QT
M	LYN	P+LP+VUS_H	singleton	8	55880105	FAI	AFR__AMR__CSA__EUR	0.655588	+	+--?+?	40.3347	1.65798e-59	7.81507e-05	185539	29	0				QT
B	SLC34A3	P+LP+VUS_H	0.001	9	137230939	eGFR	AFR__AMR__CSA__EAS__EUR__OTH	0.885874	-	-+----	-3.41843	1.77229e-59	0.0036954	460450	3401.1	1				QT
B	SLC34A3	P+LP+VUS_H	0.01	9	137230939	eGFR	AFR__AMR__CSA__EAS__EUR__OTH	0.940088	-	-+----	-3.41843	1.77229e-59	0.0036954	460450	3401.1	1				QT
M	PCSK9	P+LP+VUS_H	0.01	1	55039838	Apolipoprotein_B	AFR__CSA__EAS__EUR__OTH	0.984477	-	-?----	-0.149993	2.10401e-59	0.0016081	209339	673.28	0				QT
B	ANGPTL3	PVS1_VSS	0.001	1	62597568	Cholesterol	AFR__AMR__CSA__EAS__EUR__OTH	0.97357	-	------	-0.592992	2.78568e-59	0.00103223	460677	949.05	1				QT
B	ANGPTL3	PVS1_VSS	0.01	1	62597568	Cholesterol	AFR__AMR__CSA__EAS__EUR__OTH	0.997683	-	------	-0.592992	2.78568e-59	0.00103223	460677	949.05	1				QT
B	CETP	P+LP	0.001	16	56961990	HDL	AFR__AMR__CSA__EAS__EUR__OTH	0.810108	+	++++++	0.200843	3.26514e-59	0.00116591	421626	981.16	1				QT
B	CETP	P+LP	0.01	16	56961990	HDL	AFR__AMR__CSA__EAS__EUR__OTH	0.86135	+	++++++	0.200843	3.26514e-59	0.00116591	421626	981.16	1				QT
M	APOB	P+LP	singleton	2	21001742	Apolipoprotein_B	AFR__CSA__EAS__EUR__OTH	0.969294	-	-?----	-0.508531	3.35332e-59	0.000138531	209339	58	0				QT
M	PCSK9	P+LP	0.01	1	55039838	LDL	AFR__CSA__EAS__EUR__OTH	0.994606	-	-?----	-0.802666	3.57275e-59	0.000719203	210347	302.56	0				QT
B	DKK3	P+LP+VUS_H	singleton	11	11964474	FAI	AFR__CSA__EUR__OTH	0.642733	+	+?-?+-	39.1556	4.09585e-59	2.90674e-05	378431	22	0				QT
B	CETP	P+LP+VUS_H+D	0.001	16	56961990	HDL	AFR__AMR__CSA__EAS__EUR__OTH	0.810108	+	++++++	0.131396	5.25067e-59	0.00270297	421626	2273.29	3				QT
B	CETP	P+LP+VUS_H+D	0.01	16	56961990	HDL	AFR__AMR__CSA__EAS__EUR__OTH	0.86135	+	++++++	0.131396	5.25067e-59	0.00270297	421626	2273.29	3				QT
M	APOL3	P+LP+VUS_H+D	singleton	22	36141200	Oestrodiol	CSA__EUR__OTH	0.624107	+	?-++	98.6691	5.33844e-59	0.000198345	17646	7	0				QT
M	APOL3	P+LP+VUS_H+D	0.01	22	36141200	Oestrodiol	CSA__EUR__OTH	0.831645	+	?-++	98.6691	5.33844e-59	0.000198345	17646	7	0				QT
M	PCSK9	P+LP+VUS_H	0.01	1	55039838	LDL	AFR__CSA__EAS__EUR__OTH	0.994606	-	-?----	-0.534699	6.12264e-59	0.00161226	210347	678.27	0				QT
B	VPS33A	P+LP+VUS_H	singleton	12	122232252	FAI	AFR__CSA__EAS__EUR__OTH	0.642733	+	-?-++-	25.2272	6.21859e-59	6.44359e-05	380223	49	0				QT
M	RXRG	P+LP+VUS_H	singleton	1	165401278	Oestrodiol	CSA__EUR	0.624107	+	?-+?	111	8.76579e-59	0.000205399	17040	7	0				QT
M	C14orf119	P+LP+VUS_H	singleton	14	23097656	FAI	EUR__OTH	0.655588	+	????-+	80.2036	1.62245e-58	1.6277e-05	184309	6	0				QT
M	OR8I2	P+LP+VUS_H	singleton	11	56093308	Oestrodiol	EUR	0.624107	+	??+?	602.916	1.71918e-58	0.000150748	16584	5	0				QT
M	OR8I2	PVS1_S	singleton	11	56093308	Oestrodiol	EUR	0.624107	+	??+?	602.916	1.71918e-58	0.000150748	16584	5	0				QT
M	OR8I2	PVS1_S	0.001	11	56093308	Oestrodiol	EUR	0.728588	+	??+?	602.916	1.71918e-58	0.000150748	16584	5	0				QT
M	OR8I2	PVS1_S	0.01	11	56093308	Oestrodiol	EUR	0.831645	+	??+?	602.916	1.71918e-58	0.000150748	16584	5	0				QT
M	OR8I2	PVS1_VSS	singleton	11	56093308	Oestrodiol	EUR	0.624107	+	??+?	602.916	1.71918e-58	0.000150748	16584	5	0				QT
M	OR8I2	PVS1_VSS	0.001	11	56093308	Oestrodiol	EUR	0.728588	+	??+?	602.916	1.71918e-58	0.000150748	16584	5	0				QT
M	OR8I2	PVS1_VSS	0.01	11	56093308	Oestrodiol	EUR	0.831645	+	??+?	602.916	1.71918e-58	0.000150748	16584	5	0				QT
M	OR8I2	PVS1_VSSM	singleton	11	56093308	Oestrodiol	EUR	0.624107	+	??+?	602.916	1.71918e-58	0.000150748	16584	5	0				QT
M	OR8I2	PVS1_VSSM	0.001	11	56093308	Oestrodiol	EUR	0.728588	+	??+?	602.916	1.71918e-58	0.000150748	16584	5	0				QT
M	OR8I2	PVS1_VSSM	0.01	11	56093308	Oestrodiol	EUR	0.831645	+	??+?	602.916	1.71918e-58	0.000150748	16584	5	0				QT
M	OR8I2	PVS1_VSSMP	singleton	11	56093308	Oestrodiol	EUR	0.624107	+	??+?	602.916	1.71918e-58	0.000150748	16584	5	0				QT
M	OR8I2	PVS1_VSSMP	0.001	11	56093308	Oestrodiol	EUR	0.728588	+	??+?	602.916	1.71918e-58	0.000150748	16584	5	0				QT
M	OR8I2	PVS1_VSSMP	0.01	11	56093308	Oestrodiol	EUR	0.831645	+	??+?	602.916	1.71918e-58	0.000150748	16584	5	0				QT
B	SLC34A3	P+LP+VUS_H+D	0.01	9	137230939	eGFR	AFR__AMR__CSA__EAS__EUR__OTH	0.940088	-	-++---	-2.45015	1.80666e-58	0.0072195	460450	6642.43	3				QT
B	GCK	P+LP	0.001	7	44145154	Type_2_diabetes	AFR__AMR__CSA__EAS__EUR__OTH	1.05506	+	+-++++	11.3048	2.89128e-58	0.000255845	43674	104	0	439041	143	0	BT
B	GCK	P+LP	0.01	7	44145154	Type_2_diabetes	AFR__AMR__CSA__EAS__EUR__OTH	1.0457	+	+-++++	11.3048	2.89128e-58	0.000255845	43674	104	0	439041	143	0	BT
M	APOB	PVS1_VS	0.001	2	21001742	Apolipoprotein_B	AFR__CSA__EAS__EUR__OTH	0.961118	-	-?----	-0.211121	3.36542e-58	0.000785807	209339	329	0				QT
M	APOB	PVS1_VS	0.01	2	21001742	Apolipoprotein_B	AFR__CSA__EAS__EUR__OTH	0.984477	-	-?----	-0.211121	3.36542e-58	0.000785807	209339	329	0				QT
B	PLG	P+LP+VUS_H	0.01	6	160702316	Lipoprotein_A	AFR__AMR__CSA__EUR__OTH	0.947171	-	--+?--	-11.9828	3.71083e-58	0.00624518	366603	4553	13				QT
B	ANGPTL3	PVS1_VS	0.001	1	62597568	Cholesterol	AFR__AMR__CSA__EAS__EUR__OTH	0.97357	-	------	-0.606933	4.37028e-58	0.000963799	460677	886	1				QT
B	ANGPTL3	PVS1_VS	0.01	1	62597568	Cholesterol	AFR__AMR__CSA__EAS__EUR__OTH	0.997683	-	------	-0.606933	4.37028e-58	0.000963799	460677	886	1				QT
M	C14orf119	PVS1_VSSM	singleton	14	23097656	FAI	EUR__OTH	0.655588	+	????-+	79.7869	4.7624e-58	1.6277e-05	184309	6	0				QT
M	APOB	PVS1_VS	singleton	2	21001742	Apolipoprotein_B	AFR__CSA__EAS__EUR__OTH	0.969294	-	-?----	-0.521801	4.94578e-58	0.000128977	209339	54	0				QT
M	SH2D2A	P+LP+VUS_H	singleton	1	156807181	Oestrodiol	EUR	0.624107	+	??+?	600.244	5.33243e-58	0.000150748	16584	5	0				QT
M	PCSK9	P+LP	0.01	1	55039838	Apolipoprotein_B	AFR__CSA__EAS__EUR__OTH	0.984477	-	-?----	-0.223393	5.70328e-58	0.000710728	209339	297.57	0				QT
F	ABCA1	PVS1_VSSMP	0.001	9	104784318	HDL	AFR__CSA__EAS__EUR__OTH	0.821987	-	-?----	-0.473884	6.17701e-58	0.000443644	226533	201	0				QT
F	ABCA1	PVS1_VSSMP	0.01	9	104784318	HDL	AFR__CSA__EAS__EUR__OTH	0.812249	-	-?----	-0.473884	6.17701e-58	0.000443644	226533	201	0				QT
F	APOB	P+LP+VUS_H	singleton	2	21001742	Cholesterol	AFR__CSA__EAS__EUR__OTH	0.921786	-	-?----	-1.66699	6.23654e-58	0.000232056	249329	115.72	0				QT
M	ABCA1	D	0.01	9	104784318	Apolipoprotein_A	AFR__AMR__CSA__EAS__EUR__OTH	0.712529	-	------	-0.0681159	6.23764e-58	0.0112067	194474	4342.82	8				QT
F	ABCA1	PVS1_VSSM	0.001	9	104784318	HDL	AFR__CSA__EAS__EUR__OTH	0.821987	-	-?----	-0.474884	6.83796e-58	0.000441437	226533	200	0				QT
F	ABCA1	PVS1_VSSM	0.01	9	104784318	HDL	AFR__CSA__EAS__EUR__OTH	0.812249	-	-?----	-0.474884	6.83796e-58	0.000441437	226533	200	0				QT
F	APOB	PVS1_VSS	singleton	2	21001742	Cholesterol	AFR__CSA__EAS__EUR__OTH	0.921786	-	-?----	-1.68906	7.46621e-58	0.000226039	249329	112.72	0				QT
F	PKD1	P+LP	0.001	16	2089733	End_stage_renal_disease_CDK_stage_5	AFR__CSA__EUR__OTH	0.973836	+	+++-	201.961	7.52362e-58	0.00092549	614	44.46	0	259269	436.58	0	BT
F	PKD1	P+LP	0.01	16	2089733	End_stage_renal_disease_CDK_stage_5	AFR__CSA__EUR__OTH	0.921931	+	+++-	201.961	7.52362e-58	0.00092549	614	44.46	0	259269	436.58	0	BT
B	LDLR	D	0.001	19	11089550	DLP_All	AFR__AMR__CSA__EAS__EUR__OTH	0.98421	+	++++++	2.68954	7.74103e-58	0.00167801	82508	517.74	0	400207	1102.26	0	BT
B	LDLR	D	0.01	19	11089550	DLP_All	AFR__AMR__CSA__EAS__EUR__OTH	1.03856	+	++++++	2.68954	7.74103e-58	0.00167801	82508	517.74	0	400207	1102.26	0	BT
M	TIPIN	D	singleton	15	66336961	HbA1c	EAS__EUR	0.85299	+	???-+?	30.9431	1.25897e-57	3.56873e-05	196148	14	0				QT
F	ABCA1	PVS1_VS	0.001	9	104784318	HDL	AFR__CSA__EUR__OTH	0.821987	-	-?-?--	-0.530455	2.03825e-57	0.000353012	225205	159	0				QT
F	ABCA1	PVS1_VS	0.01	9	104784318	HDL	AFR__CSA__EUR__OTH	0.812249	-	-?-?--	-0.530455	2.03825e-57	0.000353012	225205	159	0				QT
F	APOC3	PVS1_VSSMP	0.01	11	116830568	Apolipoprotein_A	AFR__CSA__EAS__EUR__OTH	0.651155	+	+?--++	0.167819	3.06736e-57	0.00240298	224513	1075	2				QT
B	PKD1	PVS1_VSS	singleton	16	2089733	Chronic_kidney_disease	AFR__CSA__EAS__EUR__OTH	1.09196	+	+?--++	27.9817	3.40917e-57	0.000122371	25192	52	0	456953	66	0	BT
F	PCSK9	P+LP	0.001	1	55039838	Apolipoprotein_B	AFR__CSA__EAS__EUR__OTH	0.986638	-	-?----	-0.182559	3.5361e-57	0.000824953	248468	409.95	0				QT
B	ABCA1	P+LP+VUS_H+D	0.01	9	104784318	Cholesterol	AFR__AMR__CSA__EAS__EUR__OTH	0.997683	-	-+----	-0.173696	3.67522e-57	0.0116298	460677	10679.1	18				QT
B	GCK	P+LP	0.001	7	44145154	DM_All	AFR__AMR__CSA__EAS__EUR__OTH	1.0466	+	+-++++	10.8087	4.33262e-57	0.000255845	44854	105	0	437861	142	0	BT
B	GCK	P+LP	0.01	7	44145154	DM_All	AFR__AMR__CSA__EAS__EUR__OTH	1.03977	+	+-++++	10.8087	4.33262e-57	0.000255845	44854	105	0	437861	142	0	BT
F	ABCA1	PVS1_VSS	0.001	9	104784318	HDL	AFR__CSA__EAS__EUR__OTH	0.821987	-	-?----	-0.477424	4.40864e-57	0.000430401	226533	195	0				QT
F	ABCA1	PVS1_VSS	0.01	9	104784318	HDL	AFR__CSA__EAS__EUR__OTH	0.812249	-	-?----	-0.477424	4.40864e-57	0.000430401	226533	195	0				QT
B	ANGPTL3	PVS1_VS	0.001	1	62597568	Triglycerides	AFR__AMR__CSA__EAS__EUR__OTH	1.02602	-	------	-0.517217	4.42102e-57	0.000964569	460309	886	1				QT
B	ANGPTL3	PVS1_VS	0.01	1	62597568	Triglycerides	AFR__AMR__CSA__EAS__EUR__OTH	1.05552	-	------	-0.517217	4.42102e-57	0.000964569	460309	886	1				QT
B	SHBG	PVS1_S	0.001	17	7630196	Testosterone	EUR__OTH	0.985622	-	????--	-1.67881	8.0871e-57	0.000814768	400114	652	0				QT
B	SHBG	PVS1_S	0.01	17	7630196	Testosterone	EUR__OTH	1.02436	-	????--	-1.67881	8.0871e-57	0.000814768	400114	652	0				QT
F	SLC22A2	P+LP+VUS_H+D	0.01	6	160217441	eGFR	AFR__AMR__CSA__EAS__EUR__OTH	0.87082	-	-+----	-4.93954	8.28287e-57	0.00322127	249582	1603.94	2				QT
M	APOA5	P+LP+VUS_H+D	0.001	11	116790137	Triglycerides	AFR__CSA__EUR__OTH	1.00585	+	+?+?+-	1.05259	8.44843e-57	0.000705108	209897	296	0				QT
M	APOA5	P+LP+VUS_H+D	0.01	11	116790137	Triglycerides	AFR__CSA__EUR__OTH	1.01197	+	+?+?+-	1.05259	8.44843e-57	0.000705108	209897	296	0				QT
M	PKD1	P+LP+VUS_H	singleton	16	2089733	eGFR	AFR__CSA__EAS__EUR__OTH	0.879692	-	-?-+--	-18.2234	8.70746e-57	0.000272921	210684	115	0				QT
M	LCAT	P+LP+VUS_H+D	0.001	16	67939916	HDL	AFR__CSA__EAS__EUR__OTH	0.840479	-	-?----	-0.292639	8.72371e-57	0.000875183	194586	340.6	0				QT
M	LCAT	P+LP+VUS_H+D	0.01	16	67939916	HDL	AFR__CSA__EAS__EUR__OTH	0.863301	-	-?----	-0.292639	8.72371e-57	0.000875183	194586	340.6	0				QT
F	APOB	P+LP	singleton	2	21001742	Cholesterol	AFR__CSA__EAS__EUR__OTH	0.921786	-	-?----	-1.70507	9.42224e-57	0.000218018	249329	108.72	0				QT
F	GMPR2	PVS1_M	0.001	14	24233217	FAI	CSA__EUR	0.860216	+	??-?+?	12.8944	1.0561e-56	2.25168e-05	177645	8	0				QT
F	GMPR2	PVS1_M	0.01	14	24233217	FAI	CSA__EUR	0.940317	+	??-?+?	12.8944	1.0561e-56	2.25168e-05	177645	8	0				QT
B	APOC3	P+LP+VUS_H+D	0.001	11	116830568	HDL	AFR__AMR__CSA__EAS__EUR__OTH	0.810108	+	+++-++	0.237759	1.09788e-56	0.000772011	421626	649	1				QT
B	APOC3	P+LP+VUS_H+D	0.01	11	116830568	HDL	AFR__AMR__CSA__EAS__EUR__OTH	0.86135	+	+++-++	0.237759	1.09788e-56	0.000772011	421626	649	1				QT
B	LDLR	D	0.001	19	11089550	Pure_hypercholesterolemia	AFR__AMR__CSA__EAS__EUR__OTH	0.973429	+	++++++	2.7119	1.21513e-56	0.00167801	76319	489.74	0	406396	1130.26	0	BT
B	LDLR	D	0.01	19	11089550	Pure_hypercholesterolemia	AFR__AMR__CSA__EAS__EUR__OTH	1.03117	+	++++++	2.7119	1.21513e-56	0.00167801	76319	489.74	0	406396	1130.26	0	BT
F	LIPC	P+LP+VUS_H+D	0.01	15	58432041	HDL	AFR__AMR__CSA__EAS__EUR__OTH	0.812249	+	+--+++	0.122098	1.61623e-56	0.0064407	226862	2912.3	5				QT
F	PCSK9	PVS1_VSS	0.001	1	55039838	Cholesterol	AFR__CSA__EAS__EUR__OTH	0.950335	-	-?----	-0.867232	1.71621e-56	0.00081808	249329	407.94	0				QT
F	PCSK9	PVS1_VSS	0.01	1	55039838	Cholesterol	AFR__AMR__CSA__EAS__EUR__OTH	0.946953	-	-+----	-0.82902	1.87729e-56	0.000892981	249693	445.94	0				QT
M	PCSK9	P+LP+VUS_H	0.001	1	55039838	Apolipoprotein_B	AFR__CSA__EAS__EUR__OTH	0.961118	-	-?----	-0.148678	2.69422e-56	0.00154361	209339	646.28	0				QT
F	GJA5	PVS1_S	singleton	1	147758171	FAI	CSA__EUR__OTH	0.74068	+	??-?++	9.52204	2.97052e-56	3.81222e-05	183620	14	0				QT
F	GJA5	PVS1_VSS	singleton	1	147758171	FAI	CSA__EUR__OTH	0.74068	+	??-?++	9.52204	2.97052e-56	3.81222e-05	183620	14	0				QT
F	GJA5	PVS1_VSSM	singleton	1	147758171	FAI	CSA__EUR__OTH	0.74068	+	??-?++	9.52204	2.97052e-56	3.81222e-05	183620	14	0				QT
F	GJA5	PVS1_VSSMP	singleton	1	147758171	FAI	CSA__EUR__OTH	0.74068	+	??-?++	9.52204	2.97052e-56	3.81222e-05	183620	14	0				QT
B	IGF1R	PVS1_S	0.001	15	98649583	FAI	EUR__OTH	0.817638	+	????++	38.8531	3.07432e-56	1.78088e-05	364989	13	0				QT
B	IGF1R	PVS1_S	0.01	15	98649583	FAI	EUR__OTH	0.864406	+	????++	38.8531	3.07432e-56	1.78088e-05	364989	13	0				QT
B	ABCA1	P+LP+VUS_H+D	0.001	9	104784318	Cholesterol	AFR__AMR__CSA__EAS__EUR__OTH	0.97357	-	-+----	-0.232542	5.43975e-56	0.00635504	460677	5841.24	7				QT
M	SCARB1	D	0.001	12	124782684	HDL	AFR__AMR__CSA__EAS__EUR__OTH	0.840479	+	++++++	0.171192	5.8265e-56	0.00244398	194764	950	1				QT
M	SCARB1	D	0.01	12	124782684	HDL	AFR__AMR__CSA__EAS__EUR__OTH	0.863301	+	++++++	0.171192	5.8265e-56	0.00244398	194764	950	1				QT
M	PCSK9	P+LP	0.001	1	55039838	LDL	AFR__CSA__EAS__EUR__OTH	0.972585	-	-?----	-0.813706	6.13211e-56	0.0006574	210347	276.56	0				QT
M	TIMMDC1	P+LP+VUS_H+D	singleton	3	119498735	Oestrodiol	EUR	0.624107	+	??+?	465.651	7.4107e-56	0.000241196	16584	8	0				QT
M	TIMMDC1	P+LP+VUS_H+D	0.001	3	119498735	Oestrodiol	EUR	0.728588	+	??+?	465.651	7.4107e-56	0.000241196	16584	8	0				QT
M	TIMMDC1	P+LP+VUS_H+D	0.01	3	119498735	Oestrodiol	EUR	0.831645	+	??+?	465.651	7.4107e-56	0.000241196	16584	8	0				QT
M	PCSK9	P+LP+VUS_H	0.001	1	55039838	LDL	AFR__CSA__EAS__EUR__OTH	0.972585	-	-?----	-0.529214	1.03565e-55	0.00155045	210347	652.27	0				QT
F	ABCA1	PVS1_VSSMP	0.001	9	104784318	Apolipoprotein_A	AFR__CSA__EAS__EUR__OTH	0.661516	-	-?----	-0.383234	1.1873e-55	0.000447636	224513	201	0				QT
F	ABCA1	PVS1_VSSMP	0.01	9	104784318	Apolipoprotein_A	AFR__CSA__EAS__EUR__OTH	0.651155	-	-?----	-0.383234	1.1873e-55	0.000447636	224513	201	0				QT
M	APOB	PVS1_VSSM	0.001	2	21001742	LDL	AFR__CSA__EAS__EUR__OTH	0.972585	-	-?----	-0.611036	1.25838e-55	0.00130115	210347	547.39	0				QT
M	APOB	PVS1_VSSMP	0.001	2	21001742	LDL	AFR__CSA__EAS__EUR__OTH	0.972585	-	-?----	-0.611036	1.25838e-55	0.00130115	210347	547.39	0				QT
F	ABCA1	PVS1_VSSM	0.001	9	104784318	Apolipoprotein_A	AFR__CSA__EAS__EUR__OTH	0.661516	-	-?----	-0.383856	1.47656e-55	0.000445409	224513	200	0				QT
F	ABCA1	PVS1_VSSM	0.01	9	104784318	Apolipoprotein_A	AFR__CSA__EAS__EUR__OTH	0.651155	-	-?----	-0.383856	1.47656e-55	0.000445409	224513	200	0				QT
B	SCARB1	P+LP+VUS_H	0.001	12	124782684	HDL	AFR__CSA__EAS__EUR__OTH	0.810108	+	+?+-++	0.20724	1.73777e-55	0.000989183	421119	833.13	0				QT
B	SCARB1	P+LP+VUS_H	0.01	12	124782684	HDL	AFR__CSA__EAS__EUR__OTH	0.86135	+	+?+-++	0.20724	1.73777e-55	0.000989183	421119	833.13	0				QT
F	APOB	PVS1_VSS	0.001	2	21001742	Cholesterol	AFR__CSA__EAS__EUR__OTH	0.950335	-	-?----	-0.712815	1.7666e-55	0.00138267	249329	689.48	0				QT
F	APOB	PVS1_VSS	0.01	2	21001742	Cholesterol	AFR__CSA__EAS__EUR__OTH	0.946953	-	-?----	-0.712815	1.7666e-55	0.00138267	249329	689.48	0				QT
F	ABCA1	PVS1_VS	0.001	9	104784318	Apolipoprotein_A	AFR__CSA__EUR__OTH	0.661516	-	-?-?--	-0.430134	1.80752e-55	0.000356178	223203	159	0				QT
F	ABCA1	PVS1_VS	0.01	9	104784318	Apolipoprotein_A	AFR__CSA__EUR__OTH	0.651155	-	-?-?--	-0.430134	1.80752e-55	0.000356178	223203	159	0				QT
F	GCK	D	0.001	7	44145154	HbA1c	AFR__CSA__EAS__EUR__OTH	0.921872	+	+?++++	6.51996	2.14631e-55	0.000393876	248809	196	0				QT
F	GCK	D	0.01	7	44145154	HbA1c	AFR__CSA__EAS__EUR__OTH	0.924101	+	+?++++	6.51996	2.14631e-55	0.000393876	248809	196	0				QT
M	CZIB	PVS1_VSSMP	0.001	1	53214662	Oestrodiol	EUR	0.728588	+	??+?	395.075	2.30183e-55	0.000331645	16584	11	0				QT
F	PCSK9	P+LP	0.01	1	55039838	Apolipoprotein_B	AFR__AMR__CSA__EAS__EUR__OTH	0.97542	-	-+----	-0.171346	3.28659e-55	0.00090011	248830	447.95	0				QT
M	APOB	PVS1_VSSM	0.01	2	21001742	LDL	AFR__CSA__EAS__EUR__OTH	0.994606	-	-?----	-0.603075	3.59697e-55	0.00130828	210347	550.39	0				QT
M	APOB	PVS1_VSSMP	0.01	2	21001742	LDL	AFR__CSA__EAS__EUR__OTH	0.994606	-	-?----	-0.603075	3.59697e-55	0.00130828	210347	550.39	0				QT
M	PCSK9	PVS1_VSS	0.01	1	55039838	Cholesterol	AFR__CSA__EAS__EUR__OTH	0.993414	-	-?-+--	-1.02084	3.9035e-55	0.000718991	210800	303.13	0				QT
F	APOB	PVS1_VS	singleton	2	21001742	Cholesterol	AFR__CSA__EAS__EUR__OTH	0.921786	-	-?----	-1.72015	4.08902e-55	0.000207991	249329	103.72	0				QT
F	PCSK9	D	0.01	1	55039838	Cholesterol	AFR__AMR__CSA__EAS__EUR__OTH	0.946953	-	------	-0.413527	5.30406e-55	0.00344909	249693	1720.43	1				QT
M	PCSK9	P+LP	0.001	1	55039838	Apolipoprotein_B	AFR__CSA__EAS__EUR__OTH	0.961118	-	-?----	-0.226757	5.36983e-55	0.000646239	209339	270.57	0				QT
M	LMTK2	P+LP+VUS_H	singleton	7	98107183	Oestrodiol	EUR	0.624107	+	??+?	435.26	5.58705e-55	0.000271346	16584	9	0				QT
M	LMTK2	P+LP+VUS_H	0.001	7	98107183	Oestrodiol	EUR	0.728588	+	??+?	435.26	5.58705e-55	0.000271346	16584	9	0				QT
M	LMTK2	P+LP+VUS_H	0.01	7	98107183	Oestrodiol	EUR	0.831645	+	??+?	435.26	5.58705e-55	0.000271346	16584	9	0				QT
B	DCUN1D3	P+LP+VUS_H	0.001	16	20859901	FAI	EUR__OTH	0.817638	+	????++	36.8699	6.5532e-55	2.8768e-05	364989	21	0				QT
B	DCUN1D3	P+LP+VUS_H	0.01	16	20859901	FAI	EUR__OTH	0.864406	+	????++	36.8699	6.5532e-55	2.8768e-05	364989	21	0				QT
B	ASH1L	PVS1_VS	singleton	1	155337668	FAI	CSA__EUR	0.642733	+	??-?+?	41.1227	6.80356e-55	2.3603e-05	360123	17	0				QT
B	PHF20L1	PVS1_VS	0.001	8	132777835	FAI	CSA__EUR__OTH	0.817638	+	??+?+-	20.4089	7.3697e-55	9.40264e-05	372236	70	0				QT
B	PHF20L1	PVS1_VS	0.01	8	132777835	FAI	CSA__EUR__OTH	0.864406	+	??+?+-	20.4089	7.3697e-55	9.40264e-05	372236	70	0				QT
M	C14orf119	PVS1_VSSMP	singleton	14	23097656	FAI	EUR__OTH	0.655588	+	????++	71.9355	7.5132e-55	1.89898e-05	184309	7	0				QT
F	LPL	P+LP+VUS_H	0.001	8	19939442	Triglycerides	AFR__CSA__EAS__EUR__OTH	0.97581	+	+?++++	0.488963	7.58887e-55	0.0013373	249189	666.48	0				QT
F	LPL	P+LP+VUS_H	0.01	8	19939442	Triglycerides	AFR__CSA__EAS__EUR__OTH	1.04889	+	+?++++	0.488963	7.58887e-55	0.0013373	249189	666.48	0				QT
F	RCAN1	PVS1_VSSMP	singleton	21	34518093	Testosterone	CSA__EUR	0.721949	+	??+?+?	3.91992	8.30312e-55	1.782e-05	196409	7	0				QT
B	APOB	PVS1_VSSM	0.001	2	21001742	Apolipoprotein_B	AFR__CSA__EAS__EUR__OTH	0.985693	-	-?----	-0.122158	1.13499e-54	0.00112464	457807	1029.74	0				QT
B	APOB	PVS1_VSSM	0.01	2	21001742	Apolipoprotein_B	AFR__CSA__EAS__EUR__OTH	1.03	-	-?----	-0.122158	1.13499e-54	0.00112464	457807	1029.74	0				QT
B	APOB	PVS1_VSSMP	0.001	2	21001742	Apolipoprotein_B	AFR__CSA__EAS__EUR__OTH	0.985693	-	-?----	-0.122158	1.13499e-54	0.00112464	457807	1029.74	0				QT
B	APOB	PVS1_VSSMP	0.01	2	21001742	Apolipoprotein_B	AFR__CSA__EAS__EUR__OTH	1.03	-	-?----	-0.122158	1.13499e-54	0.00112464	457807	1029.74	0				QT
M	PNPLA1	PVS1_VS	singleton	6	36270462	FAI	AFR__CSA__EAS__EUR__OTH	0.655588	+	+?--++	50.5205	1.37277e-54	6.14381e-05	192108	23.61	0				QT
M	PNPLA1	PVS1_VSS	singleton	6	36270462	FAI	AFR__CSA__EAS__EUR__OTH	0.655588	+	+?--++	50.5205	1.37277e-54	6.14381e-05	192108	23.61	0				QT
F	ABCA1	PVS1_VSS	0.001	9	104784318	Apolipoprotein_A	AFR__CSA__EAS__EUR__OTH	0.661516	-	-?----	-0.385106	1.46197e-54	0.000434273	224513	195	0				QT
F	ABCA1	PVS1_VSS	0.01	9	104784318	Apolipoprotein_A	AFR__CSA__EAS__EUR__OTH	0.651155	-	-?----	-0.385106	1.46197e-54	0.000434273	224513	195	0				QT
M	SHBG	PVS1_S	0.001	17	7630196	Testosterone	EUR__OTH	0.945397	-	????--	-3.14063	2.62262e-54	0.000843621	200327	338	0				QT
M	SHBG	PVS1_S	0.01	17	7630196	Testosterone	EUR__OTH	1.00893	-	????--	-3.14063	2.62262e-54	0.000843621	200327	338	0				QT
M	APOB	PVS1_VSSM	singleton	2	21001742	LDL	AFR__CSA__EAS__EUR__OTH	0.973515	-	-?----	-1.34114	3.01443e-54	0.000235325	210347	99	0				QT
M	APOB	PVS1_VSSMP	singleton	2	21001742	LDL	AFR__CSA__EAS__EUR__OTH	0.973515	-	-?----	-1.34114	3.01443e-54	0.000235325	210347	99	0				QT
M	PNPLA1	PVS1_VSSM	singleton	6	36270462	FAI	AFR__CSA__EAS__EUR__OTH	0.655588	+	+?--++	48.758	4.50677e-54	6.66435e-05	192108	25.61	0				QT
M	PNPLA1	PVS1_VSSMP	singleton	6	36270462	FAI	AFR__CSA__EAS__EUR__OTH	0.655588	+	+?--++	48.758	4.50677e-54	6.66435e-05	192108	25.61	0				QT
M	PCSK9	PVS1_VSS	0.001	1	55039838	Cholesterol	AFR__CSA__EAS__EUR__OTH	0.949009	-	-?-+--	-1.05681	4.56615e-54	0.000654949	210800	276.13	0				QT
M	RMDN3	D	singleton	15	40736544	FAI	AFR__CSA__EAS__EUR__OTH	0.655588	+	-?--+-	44.8389	5.89457e-54	6.76703e-05	192108	26	0				QT
F	ABCA1	D	0.01	9	104784318	Apolipoprotein_A	AFR__AMR__CSA__EAS__EUR__OTH	0.651155	-	------	-0.0744429	7.49144e-54	0.0113707	224840	5095.2	9				QT
M	LPA	D	0.01	6	160531735	Lipoprotein_A	AFR__AMR__CSA__EAS__EUR__OTH	0.961592	-	+-----	-9.84087	9.71544e-54	0.0173259	168168	5737.32	45				QT
M	SH2D2A	P+LP	0.01	1	156807181	Oestrodiol	AFR__EUR	0.831645	+	-?+?	98.0171	1.5767e-53	0.000146585	17055	5	0				QT
M	SH2D2A	PVS1_VS	0.01	1	156807181	Oestrodiol	AFR__EUR	0.831645	+	-?+?	98.0171	1.5767e-53	0.000146585	17055	5	0				QT
F	ANGPTL3	P+LP+VUS_H+D	0.001	1	62597568	Cholesterol	AFR__AMR__CSA__EAS__EUR__OTH	0.950335	-	------	-0.525072	1.72369e-53	0.00207752	249693	1035.48	1				QT
F	ANGPTL3	P+LP+VUS_H+D	0.01	1	62597568	Cholesterol	AFR__AMR__CSA__EAS__EUR__OTH	0.946953	-	------	-0.525072	1.72369e-53	0.00207752	249693	1035.48	1				QT
M	PIGL	P+LP+VUS_H+D	singleton	17	16217227	FAI	AFR__CSA__EUR__OTH	0.655588	+	-?+?++	41.5958	1.85661e-53	7.8329e-05	191500	30	0				QT
F	LPL	P+LP+VUS_H+D	0.01	8	19939442	Triglycerides	AFR__AMR__CSA__EAS__EUR__OTH	1.04889	+	+-++++	0.459729	2.18965e-53	0.00146559	249553	731.48	0				QT
F	ANGPTL3	P+LP+VUS_H+D	0.001	1	62597568	Triglycerides	AFR__AMR__CSA__EAS__EUR__OTH	0.97581	-	------	-0.384823	2.43735e-53	0.00208269	249553	1037.48	1				QT
F	ANGPTL3	P+LP+VUS_H+D	0.01	1	62597568	Triglycerides	AFR__AMR__CSA__EAS__EUR__OTH	1.04889	-	------	-0.384823	2.43735e-53	0.00208269	249553	1037.48	1				QT
M	LPL	P+LP	0.001	8	19939442	Triglycerides	AFR__CSA__EAS__EUR__OTH	1.00585	+	+?++++	0.803098	3.10032e-53	0.00113159	210572	476.56	0				QT
M	LPL	P+LP	0.01	8	19939442	Triglycerides	AFR__CSA__EAS__EUR__OTH	1.01197	+	+?++++	0.803098	3.10032e-53	0.00113159	210572	476.56	0				QT
M	ABCA1	D	0.01	9	104784318	HDL	AFR__AMR__CSA__EAS__EUR__OTH	0.863301	-	------	-0.0777795	3.45219e-53	0.01119	194764	4342.8	8				QT
F	LPL	P+LP+VUS_H+D	0.001	8	19939442	Triglycerides	AFR__AMR__CSA__EAS__EUR__OTH	0.97581	+	+-++++	0.460268	3.96495e-53	0.00145757	249553	727.48	0				QT
B	PHF20L1	P+LP	0.001	8	132777835	FAI	CSA__EUR__OTH	0.817638	+	??+?+-	19.7609	4.4296e-53	9.67128e-05	372236	72	0				QT
B	PHF20L1	P+LP	0.01	8	132777835	FAI	CSA__EUR__OTH	0.864406	+	??+?+-	19.7609	4.4296e-53	9.67128e-05	372236	72	0				QT
F	PSMA7	PVS1_VSS	singleton	20	62136864	Testosterone	EUR	0.721949	+	????+?	4.21993	4.48175e-53	1.55326e-05	193142	6	0				QT
B	GCK	P+LP+VUS_H	0.001	7	44145154	Glucose	AFR__CSA__EAS__EUR__OTH	0.845615	+	+?++++	1.17031	7.15665e-53	0.000383772	420823	323	0				QT
B	GCK	P+LP+VUS_H	0.01	7	44145154	Glucose	AFR__CSA__EAS__EUR__OTH	0.845663	+	+?++++	1.17031	7.15665e-53	0.000383772	420823	323	0				QT
M	APOB	PVS1_VSS	singleton	2	21001742	Cholesterol	AFR__CSA__EAS__EUR__OTH	0.934906	-	-?----	-1.92297	7.47569e-53	0.000192125	210800	81	0				QT
M	LPL	P+LP+VUS_H	0.001	8	19939442	Triglycerides	AFR__CSA__EAS__EUR__OTH	1.00585	+	+?++++	0.728191	7.82975e-53	0.0013453	210572	566.56	0				QT
M	LPL	P+LP+VUS_H	0.01	8	19939442	Triglycerides	AFR__CSA__EAS__EUR__OTH	1.01197	+	+?++++	0.728191	7.82975e-53	0.0013453	210572	566.56	0				QT
B	PHF20L1	PVS1_VSS	0.001	8	132777835	FAI	CSA__EUR__OTH	0.817638	+	??+?+-	19.7038	8.68612e-53	9.67128e-05	372236	72	0				QT
B	PHF20L1	PVS1_VSS	0.01	8	132777835	FAI	CSA__EUR__OTH	0.864406	+	??+?+-	19.7038	8.68612e-53	9.67128e-05	372236	72	0				QT
M	ABCA1	PVS1_VSSMP	0.001	9	104784318	Apolipoprotein_A	AFR__CSA__EUR__OTH	0.699283	-	-?-?--	-0.340839	1.15941e-52	0.000407885	193682	158	0				QT
M	ABCA1	PVS1_VSSMP	0.01	9	104784318	Apolipoprotein_A	AFR__CSA__EUR__OTH	0.712529	-	-?-?--	-0.340839	1.15941e-52	0.000407885	193682	158	0				QT
F	APOB	PVS1_VSSM	singleton	2	21001742	Apolipoprotein_B	AFR__CSA__EAS__EUR__OTH	0.939563	-	+?----	-0.363037	3.01397e-52	0.000196645	248468	97.72	0				QT
F	APOB	PVS1_VSSMP	singleton	2	21001742	Apolipoprotein_B	AFR__CSA__EAS__EUR__OTH	0.939563	-	+?----	-0.363037	3.01397e-52	0.000196645	248468	97.72	0				QT
M	ABCA1	PVS1_VSSM	0.001	9	104784318	Apolipoprotein_A	AFR__CSA__EUR__OTH	0.699283	-	-?-?--	-0.341442	3.36227e-52	0.000402722	193682	156	0				QT
M	ABCA1	PVS1_VSSM	0.01	9	104784318	Apolipoprotein_A	AFR__CSA__EUR__OTH	0.712529	-	-?-?--	-0.341442	3.36227e-52	0.000402722	193682	156	0				QT
M	ABCA1	PVS1_VSS	0.001	9	104784318	Apolipoprotein_A	AFR__CSA__EUR__OTH	0.699283	-	-?-?--	-0.344481	4.03203e-52	0.000394977	193682	153	0				QT
M	ABCA1	PVS1_VSS	0.01	9	104784318	Apolipoprotein_A	AFR__CSA__EUR__OTH	0.712529	-	-?-?--	-0.344481	4.03203e-52	0.000394977	193682	153	0				QT
B	SLC34A3	P+LP+VUS_H+D	0.001	9	137230939	eGFR	AFR__AMR__CSA__EAS__EUR__OTH	0.885874	-	--+---	-2.57848	4.44738e-52	0.00582075	460450	5356.33	2				QT
M	ANGPTL3	P+LP+VUS_H+D	0.01	1	62597568	Triglycerides	AFR__AMR__CSA__EAS__EUR__OTH	1.01197	-	------	-0.568514	7.74809e-52	0.00212836	210756	897.13	0				QT
F	APOB	PVS1_VSSM	singleton	2	21001742	Cholesterol	AFR__CSA__EAS__EUR__OTH	0.921786	-	-?----	-1.49863	9.42119e-52	0.000254115	249329	126.72	0				QT
F	APOB	PVS1_VSSMP	singleton	2	21001742	Cholesterol	AFR__CSA__EAS__EUR__OTH	0.921786	-	-?----	-1.49863	9.42119e-52	0.000254115	249329	126.72	0				QT
M	SOD1	D	singleton	21	31659771	HbA1c	AFR__CSA__EUR	0.85299	+	+?-?+?	31.8374	1.04988e-51	4.19157e-05	202788	17	0				QT
M	FRYL	PVS1_VS	singleton	4	48499431	Oestrodiol	EUR	0.624107	+	??+?	399.976	1.08939e-51	0.000301495	16584	10	0				QT
M	CTSB	P+LP+VUS_H	singleton	8	11845128	Oestrodiol	EUR	0.624107	+	??+?	399.305	1.55738e-51	0.000301495	16584	10	0				QT
F	PKD1	PVS1_VS	0.001	16	2089733	End_stage_renal_disease_CDK_stage_5	AFR__CSA__EUR__OTH	0.973836	+	+-+-	354.898	1.7397e-51	0.000455165	614	34	0	259269	202.58	0	BT
F	PKD1	PVS1_VS	0.01	16	2089733	End_stage_renal_disease_CDK_stage_5	AFR__CSA__EUR__OTH	0.921931	+	+-+-	354.898	1.7397e-51	0.000455165	614	34	0	259269	202.58	0	BT
M	LIPC	P+LP+VUS_H+D	0.01	15	58432041	Apolipoprotein_A	AFR__AMR__CSA__EAS__EUR__OTH	0.712529	+	+-+-++	0.0818086	2.92001e-51	0.00684394	194474	2649.94	6				QT
M	PCSK9	D	0.01	1	55039838	Cholesterol	AFR__AMR__CSA__EAS__EUR__OTH	0.993414	-	------	-0.439614	5.12876e-51	0.00350068	210984	1473.18	2				QT
F	PCSK9	P+LP+VUS_H	0.01	1	55039838	Cholesterol	AFR__AMR__CSA__EAS__EUR__OTH	0.946953	-	-+----	-0.565157	5.78708e-51	0.0017278	249693	862.84	0				QT
M	LPL	P+LP+VUS_H+D	0.001	8	19939442	Triglycerides	AFR__CSA__EAS__EUR__OTH	1.00585	+	+?++++	0.683826	6.25785e-51	0.00146877	210572	618.56	0				QT
M	LPL	P+LP+VUS_H+D	0.01	8	19939442	Triglycerides	AFR__CSA__EAS__EUR__OTH	1.01197	+	+?++++	0.683826	6.25785e-51	0.00146877	210572	618.56	0				QT
B	GCK	P+LP+VUS_H	0.001	7	44145154	Type_2_diabetes	AFR__AMR__CSA__EAS__EUR__OTH	1.05506	+	+-++++	7.3672	6.80705e-51	0.0003905	43674	124	0	439041	253	0	BT
B	GCK	P+LP+VUS_H	0.01	7	44145154	Type_2_diabetes	AFR__AMR__CSA__EAS__EUR__OTH	1.0457	+	+-++++	7.3672	6.80705e-51	0.0003905	43674	124	0	439041	253	0	BT
M	APOA5	P+LP	0.001	11	116790137	Triglycerides	EUR	1.00585	+	????+?	1.27441	8.37111e-51	0.000458211	195325	179	0				QT
M	APOA5	P+LP	0.01	11	116790137	Triglycerides	EUR	1.01197	+	????+?	1.27441	8.37111e-51	0.000458211	195325	179	0				QT
F	PCSK9	P+LP+VUS_H	0.001	1	55039838	Cholesterol	AFR__CSA__EAS__EUR__OTH	0.950335	-	-?----	-0.578677	1.19721e-50	0.0016481	249329	821.84	0				QT
B	ENC1	P+LP+VUS_H	singleton	5	74634684	FAI	AFR__CSA__EUR__OTH	0.642733	+	-?+?+-	21.8425	1.25889e-50	7.39897e-05	378431	56	0				QT
F	UGT2A2	P+LP	singleton	4	69589394	FAI	AFR__CSA__EAS__EUR__OTH	0.74068	+	-?-+++	3.79887	1.2722e-50	5.04888e-05	188115	19	0				QT
F	UGT2A2	PVS1_VS	singleton	4	69589394	FAI	AFR__CSA__EAS__EUR__OTH	0.74068	+	-?-+++	3.79887	1.2722e-50	5.04888e-05	188115	19	0				QT
F	RPRD2	PVS1_VSSMP	singleton	1	150364715	FAI	EUR	0.74068	+	????+?	14.6966	1.63938e-50	1.43098e-05	174705	5	0				QT
F	RPRD2	PVS1_VSSMP	0.001	1	150364715	FAI	EUR	0.860216	+	????+?	14.6966	1.63938e-50	1.43098e-05	174705	5	0				QT
F	RPRD2	PVS1_VSSMP	0.01	1	150364715	FAI	EUR	0.940317	+	????+?	14.6966	1.63938e-50	1.43098e-05	174705	5	0				QT
M	PHF20L1	PVS1_VSSM	0.001	8	132777835	FAI	CSA__EUR__OTH	0.79363	+	??+?+-	33.2069	2.05953e-50	0.00011929	188616	45	0				QT
M	PHF20L1	PVS1_VSSM	0.01	8	132777835	FAI	CSA__EUR__OTH	0.845248	+	??+?+-	33.2069	2.05953e-50	0.00011929	188616	45	0				QT
M	PHF20L1	PVS1_VSSMP	0.001	8	132777835	FAI	CSA__EUR__OTH	0.79363	+	??+?+-	33.2069	2.05953e-50	0.00011929	188616	45	0				QT
M	PHF20L1	PVS1_VSSMP	0.01	8	132777835	FAI	CSA__EUR__OTH	0.845248	+	??+?+-	33.2069	2.05953e-50	0.00011929	188616	45	0				QT
B	GCK	P	0.001	7	44145154	Type_2_diabetes	AMR__CSA__EUR__OTH	1.05506	+	?-+?++	14.2183	2.09459e-50	0.000172467	41936	78	0	430617	85	0	BT
B	GCK	P	0.01	7	44145154	Type_2_diabetes	AMR__CSA__EUR__OTH	1.0457	+	?-+?++	14.2183	2.09459e-50	0.000172467	41936	78	0	430617	85	0	BT
B	GCK	P+LP+VUS_H	0.001	7	44145154	DM_All	AFR__AMR__CSA__EAS__EUR__OTH	1.0466	+	+-++++	6.9241	2.22112e-50	0.0003905	44854	126	0	437861	251	0	BT
B	GCK	P+LP+VUS_H	0.01	7	44145154	DM_All	AFR__AMR__CSA__EAS__EUR__OTH	1.03977	+	+-++++	6.9241	2.22112e-50	0.0003905	44854	126	0	437861	251	0	BT
F	PKD1	PVS1_VSS	0.001	16	2089733	End_stage_renal_disease_CDK_stage_5	AFR__CSA__EUR__OTH	0.973836	+	+++-	274.089	2.28858e-50	0.00056483	614	36	0	259269	255.58	1	BT
F	PKD1	PVS1_VSS	0.01	16	2089733	End_stage_renal_disease_CDK_stage_5	AFR__CSA__EUR__OTH	0.921931	+	+++-	274.089	2.28858e-50	0.00056483	614	36	0	259269	255.58	1	BT
F	PTP4A1	P+LP+VUS_H	singleton	6	63576887	Testosterone	EUR	0.721949	+	????+?	3.79939	2.86696e-50	1.81214e-05	193142	7	0				QT
F	PTP4A1	P+LP+VUS_H	0.001	6	63576887	Testosterone	EUR	0.862809	+	????+?	3.79939	2.86696e-50	1.81214e-05	193142	7	0				QT
F	PTP4A1	P+LP+VUS_H	0.01	6	63576887	Testosterone	EUR	0.873707	+	????+?	3.79939	2.86696e-50	1.81214e-05	193142	7	0				QT
F	SYTL1	PVS1_M	0.001	1	27345319	FAI	AFR__EUR	0.860216	+	-???+?	7.35609	3.35429e-50	5.3366e-05	178016	19	0				QT
F	SYTL1	PVS1_M	0.01	1	27345319	FAI	AFR__EUR	0.940317	+	-???+?	7.35609	3.35429e-50	5.3366e-05	178016	19	0				QT
F	ABCA1	P	0.001	9	104784318	HDL	AFR__CSA__EUR__OTH	0.821987	-	-?-?--	-0.429055	3.51089e-50	0.000468462	225205	211	0				QT
F	ABCA1	P	0.01	9	104784318	HDL	AFR__CSA__EUR__OTH	0.812249	-	-?-?--	-0.429055	3.51089e-50	0.000468462	225205	211	0				QT
F	APOB	PVS1_VSSM	0.001	2	21001742	Cholesterol	AFR__CSA__EAS__EUR__OTH	0.950335	-	-?----	-0.638817	4.63035e-50	0.0015431	249329	769.48	0				QT
F	APOB	PVS1_VSSM	0.01	2	21001742	Cholesterol	AFR__CSA__EAS__EUR__OTH	0.946953	-	-?----	-0.638817	4.63035e-50	0.0015431	249329	769.48	0				QT
F	APOB	PVS1_VSSMP	0.001	2	21001742	Cholesterol	AFR__CSA__EAS__EUR__OTH	0.950335	-	-?----	-0.638817	4.63035e-50	0.0015431	249329	769.48	0				QT
F	APOB	PVS1_VSSMP	0.01	2	21001742	Cholesterol	AFR__CSA__EAS__EUR__OTH	0.946953	-	-?----	-0.638817	4.63035e-50	0.0015431	249329	769.48	0				QT
M	APOB	PVS1_VS	singleton	2	21001742	Cholesterol	AFR__CSA__EAS__EUR__OTH	0.934906	-	-?----	-1.96699	4.91875e-50	0.00017315	210800	73	0				QT
M	DKK3	PVS1_S	0.001	11	11964474	FAI	CSA__EUR	0.79363	+	??-?+?	58.6687	5.17926e-50	3.83608e-05	182478	14	0				QT
M	DKK3	PVS1_S	0.01	11	11964474	FAI	CSA__EUR	0.845248	+	??-?+?	58.6687	5.17926e-50	3.83608e-05	182478	14	0				QT
B	GCK	P+LP+VUS_H+D	0.001	7	44145154	Glucose	AFR__CSA__EAS__EUR__OTH	0.845615	+	+?+-++	1.01726	5.87167e-50	0.000477635	420823	402	0				QT
B	GCK	P+LP+VUS_H+D	0.01	7	44145154	Glucose	AFR__CSA__EAS__EUR__OTH	0.845663	+	+?+-++	1.01726	5.87167e-50	0.000477635	420823	402	0				QT
B	ZNF229	PVS1_VSS	0.01	19	44428306	Apolipoprotein_B	AFR__AMR__CSA__EAS__EUR__OTH	1.03	-	--+---	-0.0480012	5.96811e-50	0.00600226	458349	5456.26	23				QT
F	PKD1	PVS1_VSSM	0.001	16	2089733	End_stage_renal_disease_CDK_stage_5	AFR__CSA__EUR__OTH	0.973836	+	+++-	268.364	6.10234e-50	0.000580221	614	36	0	259269	263.58	1	BT
F	PKD1	PVS1_VSSM	0.01	16	2089733	End_stage_renal_disease_CDK_stage_5	AFR__CSA__EUR__OTH	0.921931	+	+++-	268.364	6.10234e-50	0.000580221	614	36	0	259269	263.58	1	BT
F	PKD1	PVS1_VSSMP	0.001	16	2089733	End_stage_renal_disease_CDK_stage_5	AFR__CSA__EUR__OTH	0.973836	+	+++-	268.364	6.10234e-50	0.000580221	614	36	0	259269	263.58	1	BT
F	PKD1	PVS1_VSSMP	0.01	16	2089733	End_stage_renal_disease_CDK_stage_5	AFR__CSA__EUR__OTH	0.921931	+	+++-	268.364	6.10234e-50	0.000580221	614	36	0	259269	263.58	1	BT
B	GCK	P	0.001	7	44145154	DM_All	AMR__CSA__EUR__OTH	1.0466	+	?-+?++	13.7459	6.83681e-50	0.000172467	43079	79	0	429474	84	0	BT
B	GCK	P	0.01	7	44145154	DM_All	AMR__CSA__EUR__OTH	1.03977	+	?-+?++	13.7459	6.83681e-50	0.000172467	43079	79	0	429474	84	0	BT
F	LPL	P+LP	0.001	8	19939442	Triglycerides	AFR__CSA__EAS__EUR__OTH	0.97581	+	+?++++	0.504201	9.53507e-50	0.00114267	249189	569.48	0				QT
F	LPL	P+LP	0.01	8	19939442	Triglycerides	AFR__CSA__EAS__EUR__OTH	1.04889	+	+?++++	0.504201	9.53507e-50	0.00114267	249189	569.48	0				QT
M	ANGPTL3	P+LP+VUS_H+D	0.001	1	62597568	Triglycerides	AFR__AMR__CSA__EUR__OTH	1.00585	-	---?--	-0.56222	1.33099e-49	0.00207808	210081	873.13	0				QT
F	PCSK9	P+LP	0.001	1	55039838	Cholesterol	AFR__CSA__EAS__EUR__OTH	0.950335	-	-?----	-0.799551	1.44697e-49	0.000836129	249329	416.94	0				QT
B	ZNF229	PVS1_S	0.01	19	44428306	Apolipoprotein_B	AFR__AMR__CSA__EAS__EUR__OTH	1.03	-	--+---	-0.047828	1.68649e-49	0.00598917	458349	5444.26	23				QT
F	PCSK9	PVS1_S	0.001	1	55039838	LDL	EUR__OTH	0.970828	-	????--	-0.753627	1.97578e-49	0.000581232	239147	278	0				QT
F	PCSK9	PVS1_S	0.01	1	55039838	LDL	EUR__OTH	0.979688	-	????--	-0.753627	1.97578e-49	0.000581232	239147	278	0				QT
B	CXCL17	PVS1_S	0.001	19	42428890	FAI	EUR__OTH	0.817638	+	????+-	41.6746	2.12529e-49	2.05486e-05	364989	15	0				QT
B	CXCL17	PVS1_S	0.01	19	42428890	FAI	EUR__OTH	0.864406	+	????+-	41.6746	2.12529e-49	2.05486e-05	364989	15	0				QT
M	PCSK9	PVS1_S	0.001	1	55039838	LDL	AFR__EUR__OTH	0.972585	-	-???--	-0.946906	2.47192e-49	0.000436673	204959	179	0				QT
M	PCSK9	PVS1_S	0.01	1	55039838	LDL	AFR__EUR__OTH	0.994606	-	-???--	-0.946906	2.47192e-49	0.000436673	204959	179	0				QT
M	TSNAXIP1	D	singleton	16	67807150	FAI	AFR__CSA__EUR__OTH	0.655588	+	-?+?+-	35.0943	3.64888e-49	0.000101828	191500	39	0				QT
B	HBB	D	singleton	11	5225487	HbA1c	EUR	0.826782	-	????-?	-30.0169	3.77558e-49	1.17069e-05	427098	10	0				QT
B	ANGPTL3	P+LP+VUS_H+D	0.001	1	62597568	Apolipoprotein_A	AFR__AMR__CSA__EAS__EUR__OTH	0.675979	-	-+-+--	-0.110486	4.16922e-49	0.00210971	419314	1769.26	0				QT
B	ANGPTL3	P+LP+VUS_H+D	0.01	1	62597568	Apolipoprotein_A	AFR__AMR__CSA__EAS__EUR__OTH	0.670867	-	-+-+--	-0.110486	4.16922e-49	0.00210971	419314	1769.26	0				QT
M	CELF2	P+LP+VUS_H+D	singleton	10	11018090	Oestrodiol	EUR	0.624107	+	??+?	410.553	4.17626e-49	0.000271346	16584	9	0				QT
M	CELF2	P+LP+VUS_H+D	0.001	10	11018090	Oestrodiol	EUR	0.728588	+	??+?	410.553	4.17626e-49	0.000271346	16584	9	0				QT
M	CELF2	P+LP+VUS_H+D	0.01	10	11018090	Oestrodiol	EUR	0.831645	+	??+?	410.553	4.17626e-49	0.000271346	16584	9	0				QT
M	CELF2	D	singleton	10	11018090	Oestrodiol	EUR	0.624107	+	??+?	410.553	4.17626e-49	0.000271346	16584	9	0				QT
M	CELF2	D	0.001	10	11018090	Oestrodiol	EUR	0.728588	+	??+?	410.553	4.17626e-49	0.000271346	16584	9	0				QT
M	CELF2	D	0.01	10	11018090	Oestrodiol	EUR	0.831645	+	??+?	410.553	4.17626e-49	0.000271346	16584	9	0				QT
M	SH2D2A	PVS1_VSS	0.001	1	156807181	Oestrodiol	EUR	0.728588	+	??+?	502.544	4.48859e-49	0.000180897	16584	6	0				QT
M	SH2D2A	PVS1_VSSM	0.001	1	156807181	Oestrodiol	EUR	0.728588	+	??+?	502.544	4.48859e-49	0.000180897	16584	6	0				QT
M	SH2D2A	PVS1_VSSMP	0.001	1	156807181	Oestrodiol	EUR	0.728588	+	??+?	502.544	4.48859e-49	0.000180897	16584	6	0				QT
B	APOA5	PVS1_VS	0.001	11	116790137	Triglycerides	EUR	1.02602	+	????+?	1.39997	5.52765e-49	0.000125392	426661	107	0				QT
B	APOA5	PVS1_VS	0.01	11	116790137	Triglycerides	EUR	1.05552	+	????+?	1.39997	5.52765e-49	0.000125392	426661	107	0				QT
B	SLC34A3	P	0.001	9	137230939	eGFR	AFR__CSA__EAS__EUR__OTH	0.885874	-	+?----	-4.4542	5.70538e-49	0.00177864	459902	1636	0				QT
B	SLC34A3	P	0.01	9	137230939	eGFR	AFR__CSA__EAS__EUR__OTH	0.940088	-	+?----	-4.4542	5.70538e-49	0.00177864	459902	1636	0				QT
M	APOA5	PVS1_S	0.001	11	116790137	Triglycerides	CSA__EUR__OTH	1.00585	+	??+?++	1.25817	6.53906e-49	0.000428022	206765	177	0				QT
M	APOA5	PVS1_S	0.01	11	116790137	Triglycerides	CSA__EUR__OTH	1.01197	+	??+?++	1.25817	6.53906e-49	0.000428022	206765	177	0				QT
B	PKD1	P+LP+VUS_H+D	0.001	16	2089733	End_stage_renal_disease_CDK_stage_5	AFR__CSA__EUR__OTH	0.928649	+	++++	6.13155	6.79579e-49	0.0102898	1706	149	0	478191	9699.09	14	BT
M	LCAT	D	0.001	16	67939916	HDL	AFR__CSA__EUR__OTH	0.840479	-	-?-?--	-0.288389	6.80055e-49	0.000770738	193970	299	0				QT
M	LCAT	D	0.01	16	67939916	HDL	AFR__CSA__EUR__OTH	0.863301	-	-?-?--	-0.288389	6.80055e-49	0.000770738	193970	299	0				QT
F	LCAT	P+LP+VUS_H	0.001	16	67939916	HDL	AFR__CSA__EUR__OTH	0.821987	-	-?-?--	-0.409989	6.88671e-49	0.000508426	225205	229	0				QT
F	LCAT	P+LP+VUS_H	0.01	16	67939916	HDL	AFR__CSA__EUR__OTH	0.812249	-	-?-?--	-0.409989	6.88671e-49	0.000508426	225205	229	0				QT
B	SCYL1	PVS1_M	0.001	11	65525154	FAI	CSA__EAS__EUR__OTH	0.817638	+	??++++	20.3652	7.12157e-49	8.02079e-05	374028	60	0				QT
B	SCYL1	PVS1_M	0.01	11	65525154	FAI	CSA__EAS__EUR__OTH	0.864406	+	??++++	20.3652	7.12157e-49	8.02079e-05	374028	60	0				QT
B	OR6N2	D	singleton	1	158776685	FAI	AFR__CSA__EUR__OTH	0.642733	+	-?-?+-	27.3631	7.56524e-49	5.15285e-05	378431	39	0				QT
B	ZNF229	PVS1_VSSM	0.01	19	44428306	Apolipoprotein_B	AFR__AMR__CSA__EAS__EUR__OTH	1.03	-	-++---	-0.0472325	8.05794e-49	0.0060525	458349	5502.32	23				QT
F	PCSK9	P+LP	0.01	1	55039838	Cholesterol	AFR__AMR__CSA__EAS__EUR__OTH	0.946953	-	-+----	-0.755489	8.2252e-49	0.000917011	249693	457.94	0				QT
F	LIPC	P+LP+VUS_H+D	0.01	15	58432041	Apolipoprotein_A	AFR__AMR__CSA__EAS__EUR__OTH	0.651155	+	++++++	0.0948809	1.08459e-48	0.00634083	224840	2845.34	3				QT
B	SLC34A3	P+LP	0.001	9	137230939	eGFR	AFR__AMR__CSA__EAS__EUR__OTH	0.885874	-	-+----	-3.64134	1.09394e-48	0.00263112	460450	2421	1				QT
B	SLC34A3	P+LP	0.01	9	137230939	eGFR	AFR__AMR__CSA__EAS__EUR__OTH	0.940088	-	-+----	-3.64134	1.09394e-48	0.00263112	460450	2421	1				QT
F	APOC3	PVS1_P	0.01	11	116830568	Apolipoprotein_A	AFR__EUR__OTH	0.651155	+	+???++	0.167426	1.2869e-48	0.00208817	219570	915	1				QT
M	APOB	PVS1_VSS	0.001	2	21001742	Cholesterol	AFR__CSA__EAS__EUR__OTH	0.949009	-	-?----	-0.806448	1.49699e-48	0.00113705	210800	479.38	0				QT
M	APOB	PVS1_VSS	0.01	2	21001742	Cholesterol	AFR__CSA__EAS__EUR__OTH	0.993414	-	-?----	-0.806448	1.49699e-48	0.00113705	210800	479.38	0				QT
M	ABCA1	PVS1_VS	0.001	9	104784318	Apolipoprotein_A	AFR__CSA__EUR__OTH	0.699283	-	-?-?--	-0.36341	1.58616e-48	0.000330439	193682	128	0				QT
M	ABCA1	PVS1_VS	0.01	9	104784318	Apolipoprotein_A	AFR__CSA__EUR__OTH	0.712529	-	-?-?--	-0.36341	1.58616e-48	0.000330439	193682	128	0				QT
B	ABCA1	P+LP	0.001	9	104784318	Cholesterol	AFR__CSA__EAS__EUR__OTH	0.97357	-	-?----	-0.601602	1.63475e-48	0.000818349	460129	753.09	0				QT
B	ABCA1	P+LP	0.01	9	104784318	Cholesterol	AFR__CSA__EAS__EUR__OTH	0.997683	-	-?----	-0.601602	1.63475e-48	0.000818349	460129	753.09	0				QT
B	GCK	P+LP	0.001	7	44145154	Glucose	AFR__CSA__EAS__EUR__OTH	0.845615	+	+?++++	1.38825	2.2578e-48	0.000249511	420823	210	0				QT
B	GCK	P+LP	0.01	7	44145154	Glucose	AFR__CSA__EAS__EUR__OTH	0.845663	+	+?++++	1.38825	2.2578e-48	0.000249511	420823	210	0				QT
M	HSPA12A	P+LP+VUS_H	0.001	10	116674784	Oestrodiol	EUR	0.728588	+	??+?	406.882	3.04244e-48	0.000271346	16584	9	0				QT
M	HSPA12A	P+LP+VUS_H	0.01	10	116674784	Oestrodiol	EUR	0.831645	+	??+?	406.882	3.04244e-48	0.000271346	16584	9	0				QT
B	APOC3	P+LP+VUS_H	0.001	11	116830568	Triglycerides	AFR__CSA__EAS__EUR__OTH	1.02602	-	-?-+--	-0.774738	3.79487e-48	0.000343657	459761	314	1				QT
B	APOC3	P+LP+VUS_H	0.01	11	116830568	Triglycerides	AFR__CSA__EAS__EUR__OTH	1.05552	-	-?-+--	-0.774738	3.79487e-48	0.000343657	459761	314	1				QT
B	PLA2G12A	P+LP+VUS_H+D	0.01	4	109714392	Triglycerides	AFR__AMR__CSA__EAS__EUR__OTH	1.05552	+	+-++++	0.156331	4.74181e-48	0.00914941	460309	8373.11	25				QT
M	APOB	P+LP	0.001	2	21001742	LDL	AFR__CSA__EAS__EUR__OTH	0.972585	-	-?----	-0.437508	6.02328e-48	0.00192064	210347	806	1				QT
M	APOB	P+LP	0.01	2	21001742	LDL	AFR__CSA__EAS__EUR__OTH	0.994606	-	-?----	-0.437508	6.02328e-48	0.00192064	210347	806	1				QT
M	APOB	P+LP	singleton	2	21001742	Cholesterol	AFR__CSA__EAS__EUR__OTH	0.934906	-	-?----	-1.89789	6.07605e-48	0.000177894	210800	75	0				QT
B	PLA2G12A	D	0.01	4	109714392	Triglycerides	AFR__AMR__CSA__EAS__EUR__OTH	1.05552	+	+-++++	0.157237	6.97032e-48	0.00900928	460309	8244.11	25				QT
M	C14orf119	P+LP+VUS_H+D	singleton	14	23097656	FAI	EUR__OTH	0.655588	+	????++	62.2321	6.99821e-48	2.17027e-05	184309	8	0				QT
F	ABCA1	P+LP+VUS_H	0.001	9	104784318	Cholesterol	AFR__AMR__CSA__EAS__EUR__OTH	0.950335	-	------	-0.559786	1.00022e-47	0.00164485	249693	821.42	0				QT
B	LRP2	P+LP+VUS_H	0.001	2	169128696	eGFR	AFR__AMR__CSA__EAS__EUR__OTH	0.885874	+	++++++	5.21873	1.23753e-47	0.00127511	460450	1174.25	0				QT
B	LRP2	P+LP+VUS_H	0.01	2	169128696	eGFR	AFR__AMR__CSA__EAS__EUR__OTH	0.940088	+	++++++	5.21873	1.23753e-47	0.00127511	460450	1174.25	0				QT
F	ABCA1	P+LP+VUS_H	0.01	9	104784318	Cholesterol	AFR__AMR__CSA__EAS__EUR__OTH	0.946953	-	------	-0.55771	1.38373e-47	0.00164685	249693	822.42	0				QT
M	ENC1	P+LP+VUS_H	singleton	5	74634684	FAI	AFR__CSA__EUR__OTH	0.655588	+	-?+?+-	37.7581	1.45403e-47	8.35509e-05	191500	32	0				QT
B	PCSK9	PVS1_VS	0.01	1	55039838	LDL	AFR__AMR__CSA__EAS__EUR__OTH	1.02789	-	------	-0.736771	1.53948e-47	0.000312312	459814	287.21	0				QT
M	LIPC	P+LP+VUS_H+D	0.01	15	58432041	HDL	AFR__AMR__CSA__EAS__EUR__OTH	0.863301	+	+-++++	0.0932591	1.73589e-47	0.00686966	194764	2663.92	6				QT
B	LCAT	P+LP	0.001	16	67939916	Apolipoprotein_A	AFR__CSA__EAS__EUR__OTH	0.675979	-	-?-+--	-0.275037	1.85679e-47	0.000334438	418810	280.13	0				QT
B	LCAT	P+LP	0.01	16	67939916	Apolipoprotein_A	AFR__CSA__EAS__EUR__OTH	0.670867	-	-?-+--	-0.275037	1.85679e-47	0.000334438	418810	280.13	0				QT
M	CZIB	PVS1_VSS	0.01	1	53214662	Oestrodiol	AFR__CSA__EUR	0.831645	+	+++?	82.1099	2.05302e-47	0.000399749	17511	14	0				QT
M	CZIB	PVS1_VSSM	0.01	1	53214662	Oestrodiol	AFR__CSA__EUR	0.831645	+	+++?	82.1099	2.05302e-47	0.000399749	17511	14	0				QT
M	SOD1	P+LP+VUS_H	singleton	21	31659771	HbA1c	AFR__CSA__EUR	0.85299	+	+?-?+?	27.8043	2.26259e-47	4.43813e-05	202788	18	0				QT
M	TAFAZZIN	PVS1_M	0.001	23	154411861	FAI	CSA__EUR__OTH	0.79363	+	??+?-+	36.6723	2.45857e-47	4.24142e-05	188616	0	8				QT
M	TAFAZZIN	PVS1_M	0.01	23	154411861	FAI	CSA__EUR__OTH	0.845248	+	??+?-+	36.6723	2.45857e-47	4.24142e-05	188616	0	8				QT
B	LIPC	P+LP+VUS_H+D	0.001	15	58432041	HDL	AFR__AMR__CSA__EAS__EUR__OTH	0.810108	+	+-++++	0.102565	3.77743e-47	0.003354	421626	2822.27	3				QT
M	APOB	P+LP+VUS_H	0.001	2	21001742	LDL	AFR__CSA__EAS__EUR__OTH	0.972585	-	-?----	-0.427503	3.79623e-47	0.00198573	210347	833.39	1				QT
M	APOB	P+LP+VUS_H	0.01	2	21001742	LDL	AFR__CSA__EAS__EUR__OTH	0.994606	-	-?----	-0.427503	3.79623e-47	0.00198573	210347	833.39	1				QT
B	GCK	P+LP	singleton	7	44145154	HbA1c	AFR__AMR__CSA__EAS__EUR__OTH	0.826782	+	+-++++	9.84337	4.53295e-47	0.000101205	459465	93	0				QT
M	APOB	PVS1_VSSM	singleton	2	21001742	Apolipoprotein_B	AFR__CSA__EAS__EUR__OTH	0.969294	-	-?----	-0.387079	4.63267e-47	0.000191078	209339	80	0				QT
M	APOB	PVS1_VSSMP	singleton	2	21001742	Apolipoprotein_B	AFR__CSA__EAS__EUR__OTH	0.969294	-	-?----	-0.387079	4.63267e-47	0.000191078	209339	80	0				QT
F	SCARB1	P+LP+VUS_H+D	0.001	12	124782684	HDL	AFR__AMR__CSA__EAS__EUR__OTH	0.821987	+	+-+-++	0.17138	6.61177e-47	0.00270649	226862	1228	0				QT
F	SCARB1	P+LP+VUS_H+D	0.01	12	124782684	HDL	AFR__AMR__CSA__EAS__EUR__OTH	0.812249	+	+-+-++	0.17138	6.61177e-47	0.00270649	226862	1228	0				QT
F	SLC22A2	P+LP+VUS_H	0.01	6	160217441	eGFR	AFR__AMR__CSA__EAS__EUR__OTH	0.87082	-	-+----	-5.92166	8.20756e-47	0.00184308	249582	918	1				QT
B	ANGPTL3	P+LP	0.001	1	62597568	Triglycerides	AFR__AMR__CSA__EAS__EUR__OTH	1.02602	-	------	-0.521578	1.08399e-46	0.00076579	460309	705	0				QT
B	ANGPTL3	P+LP	0.01	1	62597568	Triglycerides	AFR__AMR__CSA__EAS__EUR__OTH	1.05552	-	------	-0.521578	1.08399e-46	0.00076579	460309	705	0				QT
B	ZNF229	PVS1_VSSMP	0.01	19	44428306	Apolipoprotein_B	AFR__AMR__CSA__EAS__EUR__OTH	1.03	-	-+----	-0.0446068	1.14275e-46	0.00646448	458351	5872.01	27				QT
B	EMC3	P+LP+VUS_H	0.001	3	9964072	FAI	AFR__CSA__EAS__EUR__OTH	0.817638	+	+?--+-	23.5426	1.29301e-46	5.65458e-05	380223	43	0				QT
B	EMC3	P+LP+VUS_H	0.01	3	9964072	FAI	AFR__CSA__EAS__EUR__OTH	0.864406	+	+?--+-	23.5426	1.29301e-46	5.65458e-05	380223	43	0				QT
B	PKD1	P+LP+VUS_H+D	singleton	16	2089733	eGFR	AFR__AMR__CSA__EAS__EUR__OTH	0.867997	-	------	-7.01734	1.32087e-46	0.000712506	460450	656.15	0				QT
M	OR51C1P	D	singleton	11	4690762	FAI	AFR__CSA__EUR__OTH	0.655588	+	+?-?+-	37.9571	1.40395e-46	8.35509e-05	191500	32	0				QT
B	PCSK9	PVS1_VS	0.01	1	55039838	Apolipoprotein_B	AFR__AMR__CSA__EAS__EUR__OTH	1.03	-	-+----	-0.204073	1.61055e-46	0.00030787	458351	282.23	0				QT
M	CZIB	P+LP+VUS_H	0.01	1	53214662	Oestrodiol	AFR__CSA__EUR	0.831645	+	+++?	82.6525	1.62598e-46	0.000428302	17511	15	0				QT
M	HBB	P	0.001	11	5225487	HbA1c	AFR__AMR__CSA__EAS__EUR__OTH	0.906261	-	--++--	-6.23543	2.31352e-46	0.000681607	210295	286.68	0				QT
F	MSMO1	D	singleton	4	165333337	FAI	EUR__OTH	0.74068	+	????++	7.01757	2.32179e-46	5.53465e-05	180680	20	0				QT
B	PHF20L1	PVS1_VSSM	0.001	8	132777835	FAI	CSA__EUR__OTH	0.817638	+	??+?+-	16.9647	2.77049e-46	0.000116861	372236	87	0				QT
B	PHF20L1	PVS1_VSSM	0.01	8	132777835	FAI	CSA__EUR__OTH	0.864406	+	??+?+-	16.9647	2.77049e-46	0.000116861	372236	87	0				QT
B	PHF20L1	PVS1_VSSMP	0.001	8	132777835	FAI	CSA__EUR__OTH	0.817638	+	??+?+-	16.9647	2.77049e-46	0.000116861	372236	87	0				QT
B	PHF20L1	PVS1_VSSMP	0.01	8	132777835	FAI	CSA__EUR__OTH	0.864406	+	??+?+-	16.9647	2.77049e-46	0.000116861	372236	87	0				QT
F	STXBP4	PVS1_S	0.001	17	54985694	FAI	CSA__EUR	0.860216	+	??+?+?	7.12559	2.93791e-46	6.19212e-05	177645	22	0				QT
F	STXBP4	PVS1_S	0.01	17	54985694	FAI	CSA__EUR	0.940317	+	??+?+?	7.12559	2.93791e-46	6.19212e-05	177645	22	0				QT
M	PTPRG	P+LP	singleton	3	61562288	Oestrodiol	EUR	0.624107	+	??+?	344.725	3.23068e-46	0.000361795	16584	12	0				QT
M	PTPRG	P+LP	0.001	3	61562288	Oestrodiol	EUR	0.728588	+	??+?	344.725	3.23068e-46	0.000361795	16584	12	0				QT
M	PTPRG	PVS1_VS	singleton	3	61562288	Oestrodiol	EUR	0.624107	+	??+?	344.725	3.23068e-46	0.000361795	16584	12	0				QT
M	PTPRG	PVS1_VS	0.001	3	61562288	Oestrodiol	EUR	0.728588	+	??+?	344.725	3.23068e-46	0.000361795	16584	12	0				QT
M	PTPRG	PVS1_VSS	singleton	3	61562288	Oestrodiol	EUR	0.624107	+	??+?	344.725	3.23068e-46	0.000361795	16584	12	0				QT
M	APOB	P+LP+VUS_H	singleton	2	21001742	Cholesterol	AFR__CSA__EAS__EUR__OTH	0.934906	-	-?----	-1.74137	3.36943e-46	0.000203985	210800	86	0				QT
M	ABCA1	PVS1_VSSMP	0.001	9	104784318	HDL	AFR__CSA__EUR__OTH	0.840479	-	-?-?--	-0.377949	4.72915e-46	0.000413974	193970	160.6	0				QT
M	ABCA1	PVS1_VSSMP	0.01	9	104784318	HDL	AFR__CSA__EUR__OTH	0.863301	-	-?-?--	-0.377949	4.72915e-46	0.000413974	193970	160.6	0				QT
B	PKD1	P+LP+VUS_H+D	singleton	16	2089733	CKD_All	AFR__AMR__CSA__EAS__EUR__OTH	1.07487	+	+---+-	5.79769	4.98978e-46	0.000684673	25483	118	0	457232	543	0	BT
M	ZNF547	PVS1_S	0.001	19	57368543	Oestrodiol	EUR	0.728588	+	??+?	358.835	5.78551e-46	0.000331645	16584	11	0				QT
M	ZNF547	PVS1_VSS	0.001	19	57368543	Oestrodiol	EUR	0.728588	+	??+?	358.835	5.78551e-46	0.000331645	16584	11	0				QT
B	ASH1L	PVS1_VSS	singleton	1	155337668	FAI	CSA__EUR__OTH	0.642733	+	??-?++	34.1541	7.58181e-46	2.82079e-05	372236	21	0				QT
B	ASH1L	PVS1_VSSM	singleton	1	155337668	FAI	CSA__EUR__OTH	0.642733	+	??-?++	34.1541	7.58181e-46	2.82079e-05	372236	21	0				QT
F	LCAT	P+LP+VUS_H+D	0.001	16	67939916	Apolipoprotein_A	AFR__CSA__EUR__OTH	0.661516	-	-?-?--	-0.249661	8.17734e-46	0.000871404	223203	389	0				QT
F	LCAT	P+LP+VUS_H+D	0.01	16	67939916	Apolipoprotein_A	AFR__CSA__EUR__OTH	0.651155	-	-?-?--	-0.249661	8.17734e-46	0.000871404	223203	389	0				QT
M	LDLR	P+LP+VUS_H+D	0.001	19	11089550	LDL	AFR__AMR__CSA__EAS__EUR__OTH	0.972585	+	-+++++	0.416113	1.07608e-45	0.00201573	210531	848.75	0				QT
M	LDLR	P+LP+VUS_H+D	0.01	19	11089550	LDL	AFR__AMR__CSA__EAS__EUR__OTH	0.994606	+	-+++++	0.416113	1.07608e-45	0.00201573	210531	848.75	0				QT
B	ANGPTL3	P+LP	0.001	1	62597568	Cholesterol	AFR__AMR__CSA__EAS__EUR__OTH	0.97357	-	------	-0.601812	1.14217e-45	0.000765178	460677	705	0				QT
B	ANGPTL3	P+LP	0.01	1	62597568	Cholesterol	AFR__AMR__CSA__EAS__EUR__OTH	0.997683	-	------	-0.601812	1.14217e-45	0.000765178	460677	705	0				QT
F	APOB	PVS1_VSS	0.001	2	21001742	Apolipoprotein_B	AFR__CSA__EAS__EUR__OTH	0.986638	-	-?----	-0.152261	1.204e-45	0.00110534	248468	549.28	0				QT
F	APOB	PVS1_VSS	0.01	2	21001742	Apolipoprotein_B	AFR__CSA__EAS__EUR__OTH	0.97542	-	-?----	-0.152261	1.204e-45	0.00110534	248468	549.28	0				QT
B	PDE3B	P+LP+VUS_H+D	0.001	11	14644077	HDL	AFR__AMR__CSA__EAS__EUR__OTH	0.810108	+	--+-++	0.113211	1.41971e-45	0.00270177	421626	2278.27	0				QT
B	GLRA2	P+LP+VUS_H	0.001	23	14530066	FAI	AFR__CSA__EUR__OTH	0.817638	+	-?-?+-	10.1796	1.50707e-45	0.000257643	378431	43	76				QT
B	GLRA2	P+LP+VUS_H	0.01	23	14530066	FAI	AFR__CSA__EUR__OTH	0.864406	+	-?-?+-	10.1796	1.50707e-45	0.000257643	378431	43	76				QT
M	ABCA1	PVS1_VSSM	0.001	9	104784318	HDL	AFR__CSA__EUR__OTH	0.840479	-	-?-?--	-0.378131	1.51776e-45	0.000408818	193970	158.6	0				QT
M	ABCA1	PVS1_VSSM	0.01	9	104784318	HDL	AFR__CSA__EUR__OTH	0.863301	-	-?-?--	-0.378131	1.51776e-45	0.000408818	193970	158.6	0				QT
B	APOC3	PVS1_VSSM	0.001	11	116830568	Triglycerides	AFR__CSA__EAS__EUR__OTH	1.02602	-	-?-+--	-0.767116	1.8046e-45	0.000329519	459761	301	1				QT
B	APOC3	PVS1_VSSM	0.01	11	116830568	Triglycerides	AFR__CSA__EAS__EUR__OTH	1.05552	-	-?-+--	-0.767116	1.8046e-45	0.000329519	459761	301	1				QT
M	DKK3	P+LP	singleton	11	11964474	FAI	CSA__EUR	0.655588	+	??-?+?	53.2129	1.883e-45	4.11008e-05	182478	15	0				QT
B	ABCA1	D	0.01	9	104784318	Cholesterol	AFR__AMR__CSA__EAS__EUR__OTH	0.997683	-	-+----	-0.156675	1.93175e-45	0.011238	460677	10318.2	18				QT
M	ABCA1	PVS1_VSS	0.001	9	104784318	HDL	AFR__CSA__EUR__OTH	0.840479	-	-?-?--	-0.381163	2.04393e-45	0.000401085	193970	155.6	0				QT
M	ABCA1	PVS1_VSS	0.01	9	104784318	HDL	AFR__CSA__EUR__OTH	0.863301	-	-?-?--	-0.381163	2.04393e-45	0.000401085	193970	155.6	0				QT
M	WWC1	PVS1_M	singleton	5	168292154	FAI	EUR	0.655588	+	????+?	76.836	2.09667e-45	1.9644e-05	178171	7	0				QT
B	APOC3	PVS1_VSSMP	0.001	11	116830568	HDL	AFR__CSA__EAS__EUR__OTH	0.810108	+	+?+-++	0.30336	2.11923e-45	0.000375191	421119	314	1				QT
B	APOC3	PVS1_VSSMP	0.001	11	116830568	Triglycerides	AFR__CSA__EAS__EUR__OTH	1.02602	-	-?-+--	-0.738615	2.61633e-45	0.000356707	459761	326	1				QT
F	RANBP6	PVS1_S	singleton	9	6012293	Oestrodiol	AFR__EUR	0.873512	+	-???+?	2806.43	2.64428e-45	4.72751e-05	52882	5	0				QT
F	RANBP6	PVS1_VSS	singleton	9	6012293	Oestrodiol	AFR__EUR	0.873512	+	-???+?	2806.43	2.64428e-45	4.72751e-05	52882	5	0				QT
F	RANBP6	PVS1_VSSM	singleton	9	6012293	Oestrodiol	AFR__EUR	0.873512	+	-???+?	2806.43	2.64428e-45	4.72751e-05	52882	5	0				QT
F	RANBP6	PVS1_VSSMP	singleton	9	6012293	Oestrodiol	AFR__EUR	0.873512	+	-???+?	2806.43	2.64428e-45	4.72751e-05	52882	5	0				QT
M	PCSK9	P+LP	0.01	1	55039838	Cholesterol	AFR__CSA__EAS__EUR__OTH	0.993414	-	-?-+--	-0.917912	2.72691e-45	0.000722399	210800	304.56	0				QT
B	PDE3B	P+LP+VUS_H	0.001	11	14644077	HDL	AFR__CSA__EAS__EUR__OTH	0.810108	+	+?+-++	0.128626	2.80826e-45	0.00208299	421119	1754.37	0				QT
B	PDE3B	P+LP+VUS_H	0.01	11	14644077	HDL	AFR__CSA__EAS__EUR__OTH	0.86135	+	+?+-++	0.128626	2.80826e-45	0.00208299	421119	1754.37	0				QT
M	RRP1	P+LP+VUS_H	singleton	21	43789631	FAI	AFR__CSA__EAS__EUR__OTH	0.655588	+	+?-++-	40.7055	2.84771e-45	7.54784e-05	192108	29	0				QT
B	APOB	PVS1_VS	0.001	2	21001742	Triglycerides	AFR__CSA__EAS__EUR__OTH	1.02602	-	-?----	-0.419876	3.79611e-45	0.00119198	459761	1096.05	0				QT
B	APOB	PVS1_VS	0.01	2	21001742	Triglycerides	AFR__CSA__EAS__EUR__OTH	1.05552	-	-?----	-0.419876	3.79611e-45	0.00119198	459761	1096.05	0				QT
B	LPA	P+LP+VUS_H+D	0.001	6	160531735	Lipoprotein_A	AFR__AMR__CSA__EAS__EUR__OTH	0.958912	-	-+----	-10.3877	3.92457e-45	0.00605278	368510	4439.02	11				QT
M	UBL4B	D	0.001	1	110112535	HbA1c	EUR__OTH	0.906261	+	????+-	22.6748	4.401e-45	5.6893e-05	202134	23	0				QT
M	UBL4B	D	0.01	1	110112535	HbA1c	EUR__OTH	0.937865	+	????+-	22.6748	4.401e-45	5.6893e-05	202134	23	0				QT
B	CFAP74	PVS1_VS	singleton	1	1922296	FAI	AFR__CSA__EAS__EUR__OTH	0.642733	+	+?+++-	17.6416	4.69483e-45	9.99414e-05	380223	76	0				QT
M	EMC3	P+LP+VUS_H	0.001	3	9964072	FAI	AFR__CSA__EUR__OTH	0.79363	+	+?-?++	42.195	4.75348e-45	6.26632e-05	191500	24	0				QT
M	EMC3	P+LP+VUS_H	0.01	3	9964072	FAI	AFR__CSA__EUR__OTH	0.845248	+	+?-?++	42.195	4.75348e-45	6.26632e-05	191500	24	0				QT
M	PCSK9	PVS1_S	0.001	1	55039838	Apolipoprotein_B	AFR__EUR__OTH	0.961118	-	-???--	-0.254483	4.76413e-45	0.000426475	203998	174	0				QT
M	PCSK9	PVS1_S	0.01	1	55039838	Apolipoprotein_B	AFR__EUR__OTH	0.984477	-	-???--	-0.254483	4.76413e-45	0.000426475	203998	174	0				QT
M	PKD1	P+LP	0.001	16	2089733	End_stage_renal_disease_CDK_stage_5	AFR__CSA__EUR__OTH	0.914209	+	-+++	85.711	6.4126e-45	0.000994162	1092	46	0	218922	389.46	1	BT
M	PKD1	P+LP	0.01	16	2089733	End_stage_renal_disease_CDK_stage_5	AFR__CSA__EUR__OTH	0.937932	+	-+++	85.711	6.4126e-45	0.000994162	1092	46	0	218922	389.46	1	BT
M	APOB	PVS1_VSSM	0.001	2	21001742	Cholesterol	AFR__CSA__EAS__EUR__OTH	0.949009	-	-?----	-0.717801	7.49432e-45	0.00129834	210800	547.38	0				QT
M	APOB	PVS1_VSSMP	0.001	2	21001742	Cholesterol	AFR__CSA__EAS__EUR__OTH	0.949009	-	-?----	-0.717801	7.49432e-45	0.00129834	210800	547.38	0				QT
F	LIPC	D	0.01	15	58432041	HDL	AFR__AMR__CSA__EAS__EUR__OTH	0.812249	+	+--+++	0.1169	1.10698e-44	0.00549843	226862	2484.77	5				QT
F	BBS5	P+LP	singleton	2	169479554	Testosterone	AFR__CSA__EUR__OTH	0.721949	+	-?-?+-	1.87913	1.35786e-44	6.04841e-05	206666	25	0				QT
B	APOC3	PVS1_VSS	0.001	11	116830568	Triglycerides	AFR__CSA__EAS__EUR__OTH	1.02602	-	-?-+--	-0.77552	1.51428e-44	0.000315381	459761	288	1				QT
B	APOC3	PVS1_VSS	0.01	11	116830568	Triglycerides	AFR__CSA__EAS__EUR__OTH	1.05552	-	-?-+--	-0.77552	1.51428e-44	0.000315381	459761	288	1				QT
M	STIM1	P+LP	singleton	11	3856279	FAI	EUR__OTH	0.655588	+	????++	62.4674	1.51753e-44	2.98412e-05	184309	11	0				QT
B	PDE3B	P+LP+VUS_H	0.001	11	14644077	Triglycerides	AFR__CSA__EAS__EUR__OTH	1.02602	-	-?++--	-0.316992	1.59603e-44	0.00206969	459761	1903.13	0				QT
B	PDE3B	P+LP+VUS_H	0.01	11	14644077	Triglycerides	AFR__CSA__EAS__EUR__OTH	1.05552	-	-?++--	-0.316992	1.59603e-44	0.00206969	459761	1903.13	0				QT
M	APOB	PVS1_VSSM	0.01	2	21001742	Cholesterol	AFR__CSA__EAS__EUR__OTH	0.993414	-	-?----	-0.70831	1.71055e-44	0.00130545	210800	550.38	0				QT
M	APOB	PVS1_VSSMP	0.01	2	21001742	Cholesterol	AFR__CSA__EAS__EUR__OTH	0.993414	-	-?----	-0.70831	1.71055e-44	0.00130545	210800	550.38	0				QT
B	PCSK9	PVS1_VS	0.001	1	55039838	Apolipoprotein_B	AFR__CSA__EAS__EUR__OTH	0.985693	-	-?----	-0.224798	1.82056e-44	0.000240522	457807	220.23	0				QT
B	APOC3	P+LP+VUS_H	0.001	11	116830568	HDL	AFR__CSA__EAS__EUR__OTH	0.810108	+	+?+-++	0.306295	1.93943e-44	0.000359756	421119	301	1				QT
B	APOC3	P+LP+VUS_H	0.01	11	116830568	HDL	AFR__CSA__EAS__EUR__OTH	0.86135	+	+?+-++	0.306295	1.93943e-44	0.000359756	421119	301	1				QT
F	TNFRSF18	P+LP	singleton	1	1203847	FAI	CSA__EUR__OTH	0.74068	+	??+?+-	11.8497	2.21254e-44	2.17841e-05	183620	8	0				QT
F	TNFRSF18	PVS1_VS	singleton	1	1203847	FAI	CSA__EUR__OTH	0.74068	+	??+?+-	11.8497	2.21254e-44	2.17841e-05	183620	8	0				QT
F	LDLR	D	0.01	19	11089550	DLP_All	AFR__AMR__CSA__EAS__EUR__OTH	1.03792	+	++++++	3.30578	2.23362e-44	0.00174646	35419	276.86	0	226384	637.6	0	BT
F	LDLR	D	0.001	19	11089550	DLP_All	AFR__AMR__CSA__EAS__EUR__OTH	1.0103	+	++++++	3.29964	3.53498e-44	0.00174455	35419	275.86	0	226384	637.6	0	BT
B	TAFAZZIN	PVS1_VSSM	0.001	23	154411861	FAI	AFR__CSA__EUR__OTH	0.817638	+	+?+?++	17.2293	4.65976e-44	7.92747e-05	378431	10	25				QT
B	TAFAZZIN	PVS1_VSSM	0.01	23	154411861	FAI	AFR__CSA__EUR__OTH	0.864406	+	+?+?++	17.2293	4.65976e-44	7.92747e-05	378431	10	25				QT
B	TAFAZZIN	PVS1_VSSMP	0.001	23	154411861	FAI	AFR__CSA__EUR__OTH	0.817638	+	+?+?++	17.2293	4.65976e-44	7.92747e-05	378431	10	25				QT
B	TAFAZZIN	PVS1_VSSMP	0.01	23	154411861	FAI	AFR__CSA__EUR__OTH	0.864406	+	+?+?++	17.2293	4.65976e-44	7.92747e-05	378431	10	25				QT
M	RXRG	P+LP+VUS_H	0.01	1	165401278	Oestrodiol	CSA__EUR	0.831645	+	?-+?	101.298	5.05628e-44	0.000264085	17040	9	0				QT
B	PDE3B	P+LP+VUS_H+D	0.001	11	14644077	Triglycerides	AFR__AMR__CSA__EAS__EUR__OTH	1.02602	-	-+++--	-0.27698	5.24681e-44	0.00268384	460309	2470.79	0				QT
B	ASH1L	PVS1_VSSMP	singleton	1	155337668	FAI	CSA__EUR__OTH	0.642733	+	??-?++	32.6113	5.42188e-44	2.95511e-05	372236	22	0				QT
M	PKD1	P+LP+VUS_H	0.001	16	2089733	End_stage_renal_disease_CDK_stage_5	AFR__CSA__EUR__OTH	0.914209	+	-+++	63.997	5.68731e-44	0.0013305	1092	50	0	218922	531.46	2	BT
M	PKD1	P+LP+VUS_H	0.01	16	2089733	End_stage_renal_disease_CDK_stage_5	AFR__CSA__EUR__OTH	0.937932	+	-+++	63.997	5.68731e-44	0.0013305	1092	50	0	218922	531.46	2	BT
M	PCSK9	P+LP	0.001	1	55039838	Cholesterol	AFR__CSA__EAS__EUR__OTH	0.949009	-	-?-+--	-0.943943	6.46234e-44	0.000658357	210800	277.56	0				QT
B	SHBG	D	0.01	17	7630196	FAI	AFR__AMR__CSA__EAS__EUR__OTH	0.864406	+	++++++	10.3251	6.58471e-44	0.000296854	380658	226	0				QT
B	SHBG	D	0.001	17	7630196	FAI	AFR__CSA__EAS__EUR__OTH	0.817638	+	+?++++	10.3599	6.75738e-44	0.000295879	380223	225	0				QT
F	USP33	PVS1_VSS	singleton	1	77697352	Testosterone	AFR__AMR__EUR__OTH	0.721949	+	--??+-	1.86148	6.87843e-44	5.40052e-05	203684	22	0				QT
M	LDLR	P+LP+VUS_H	0.001	19	11089550	LDL	AFR__AMR__CSA__EAS__EUR__OTH	0.972585	+	-+++++	0.420369	6.89574e-44	0.00189461	210531	797.75	0				QT
M	LDLR	P+LP+VUS_H	0.01	19	11089550	LDL	AFR__AMR__CSA__EAS__EUR__OTH	0.994606	+	-+++++	0.420369	6.89574e-44	0.00189461	210531	797.75	0				QT
M	LPL	D	0.001	8	19939442	Triglycerides	AFR__CSA__EAS__EUR__OTH	1.00585	+	+?++++	0.6761	8.7724e-44	0.00127985	210572	539	0				QT
M	LPL	D	0.01	8	19939442	Triglycerides	AFR__CSA__EAS__EUR__OTH	1.01197	+	+?++++	0.6761	8.7724e-44	0.00127985	210572	539	0				QT
B	APOC3	P+LP	0.001	11	116830568	Triglycerides	AFR__CSA__EAS__EUR__OTH	1.02602	-	-?-+--	-0.772135	9.0522e-44	0.000312119	459761	285	1				QT
B	APOC3	P+LP	0.01	11	116830568	Triglycerides	AFR__CSA__EAS__EUR__OTH	1.05552	-	-?-+--	-0.772135	9.0522e-44	0.000312119	459761	285	1				QT
B	APOC3	PVS1_VS	0.001	11	116830568	Triglycerides	AFR__CSA__EAS__EUR__OTH	1.02602	-	-?-+--	-0.772135	9.0522e-44	0.000312119	459761	285	1				QT
B	APOC3	PVS1_VS	0.01	11	116830568	Triglycerides	AFR__CSA__EAS__EUR__OTH	1.05552	-	-?-+--	-0.772135	9.0522e-44	0.000312119	459761	285	1				QT
B	WHRN	P	0.001	9	114402758	FAI	AFR__CSA__EUR__OTH	0.817638	+	+?-?+-	17.7754	9.07887e-44	9.38084e-05	378431	71	0				QT
B	WHRN	P	0.01	9	114402758	FAI	AFR__CSA__EUR__OTH	0.864406	+	+?-?+-	17.7754	9.07887e-44	9.38084e-05	378431	71	0				QT
F	LDLR	D	0.01	19	11089550	Pure_hypercholesterolemia	AFR__AMR__CSA__EAS__EUR__OTH	1.02162	+	++++++	3.34483	9.91797e-44	0.00174646	32675	262.86	0	229128	651.6	0	BT
M	UBXN2A	PVS1_VSSM	singleton	2	23958298	Oestrodiol	EUR	0.624107	+	??+?	547.213	1.04936e-43	0.000176429	16584	5.85	0				QT
M	UBXN2A	PVS1_VSSM	0.001	2	23958298	Oestrodiol	EUR	0.728588	+	??+?	547.213	1.04936e-43	0.000176429	16584	5.85	0				QT
M	UBXN2A	PVS1_VSSM	0.01	2	23958298	Oestrodiol	EUR	0.831645	+	??+?	547.213	1.04936e-43	0.000176429	16584	5.85	0				QT
M	UBXN2A	PVS1_VSSMP	singleton	2	23958298	Oestrodiol	EUR	0.624107	+	??+?	547.213	1.04936e-43	0.000176429	16584	5.85	0				QT
M	UBXN2A	PVS1_VSSMP	0.001	2	23958298	Oestrodiol	EUR	0.728588	+	??+?	547.213	1.04936e-43	0.000176429	16584	5.85	0				QT
M	UBXN2A	PVS1_VSSMP	0.01	2	23958298	Oestrodiol	EUR	0.831645	+	??+?	547.213	1.04936e-43	0.000176429	16584	5.85	0				QT
B	DKK3	P+LP+VUS_H+D	singleton	11	11964474	FAI	AFR__CSA__EUR__OTH	0.642733	+	+?-?+-	27.2281	1.24187e-43	4.22798e-05	378431	32	0				QT
B	GCK	P+LP+VUS_H+D	0.001	7	44145154	Type_2_diabetes	AFR__AMR__CSA__EAS__EUR__OTH	1.05506	+	--++++	5.7258	1.45796e-43	0.000482686	43674	131	0	439041	335	0	BT
B	GCK	P+LP+VUS_H+D	0.01	7	44145154	Type_2_diabetes	AFR__AMR__CSA__EAS__EUR__OTH	1.0457	+	--++++	5.7258	1.45796e-43	0.000482686	43674	131	0	439041	335	0	BT
F	ABCA1	P	0.001	9	104784318	Apolipoprotein_A	AFR__CSA__EUR__OTH	0.661516	-	-?-?--	-0.329024	1.58803e-43	0.000472664	223203	211	0				QT
F	ABCA1	P	0.01	9	104784318	Apolipoprotein_A	AFR__CSA__EUR__OTH	0.651155	-	-?-?--	-0.329024	1.58803e-43	0.000472664	223203	211	0				QT
F	PSMA7	PVS1_VSSM	singleton	20	62136864	Testosterone	EUR	0.721949	+	????+?	3.52446	1.59657e-43	1.81214e-05	193142	7	0				QT
F	PSMA7	PVS1_VSSMP	singleton	20	62136864	Testosterone	EUR	0.721949	+	????+?	3.52446	1.59657e-43	1.81214e-05	193142	7	0				QT
F	SCARB1	D	0.001	12	124782684	HDL	AFR__AMR__CSA__EAS__EUR__OTH	0.821987	+	+-+-++	0.169896	1.8366e-43	0.0025456	226862	1155	0				QT
F	SCARB1	D	0.01	12	124782684	HDL	AFR__AMR__CSA__EAS__EUR__OTH	0.812249	+	+-+-++	0.169896	1.8366e-43	0.0025456	226862	1155	0				QT
F	LDLR	D	0.001	19	11089550	Pure_hypercholesterolemia	AFR__AMR__CSA__EAS__EUR__OTH	1.01932	+	++++++	3.33483	1.90005e-43	0.00174455	32675	261.86	0	229128	651.6	0	BT
M	FRYL	P+LP	singleton	4	48499431	Oestrodiol	EUR	0.624107	+	??+?	333.63	2.0347e-43	0.000361795	16584	12	0				QT
B	PCSK9	PVS1_VS	0.001	1	55039838	LDL	AFR__CSA__EAS__EUR__OTH	0.994287	-	-?----	-0.802034	2.22369e-43	0.000243008	459266	223.21	0				QT
B	CETP	P+LP+VUS_H	0.001	16	56961990	HDL	AFR__AMR__CSA__EAS__EUR__OTH	0.810108	+	++++++	0.130179	2.41435e-43	0.00200315	421626	1687.16	1				QT
B	CETP	P+LP+VUS_H	0.01	16	56961990	HDL	AFR__AMR__CSA__EAS__EUR__OTH	0.86135	+	++++++	0.130179	2.41435e-43	0.00200315	421626	1687.16	1				QT
M	LYN	P+LP+VUS_H	0.001	8	55880105	FAI	AFR__CSA__EUR	0.79363	+	+?-?+?	32.8616	2.64996e-43	9.98047e-05	185362	37	0				QT
M	ZDHHC6	PVS1_S	singleton	10	112430810	FAI	EUR__OTH	0.655588	+	????++	55.5292	2.78377e-43	2.44155e-05	184309	9	0				QT
M	ABCA1	PVS1_VS	0.001	9	104784318	HDL	AFR__CSA__EUR__OTH	0.840479	-	-?-?--	-0.406785	3.00323e-43	0.000336642	193970	130.6	0				QT
M	ABCA1	PVS1_VS	0.01	9	104784318	HDL	AFR__CSA__EUR__OTH	0.863301	-	-?-?--	-0.406785	3.00323e-43	0.000336642	193970	130.6	0				QT
M	CZIB	PVS1_VSSMP	0.01	1	53214662	Oestrodiol	AFR__CSA__EUR	0.831645	+	+++?	79.7039	3.14216e-43	0.000428302	17511	15	0				QT
M	PKD1	PVS1_VSSM	0.001	16	2089733	End_stage_renal_disease_CDK_stage_5	AFR__CSA__EUR__OTH	0.914209	+	-+++	113.492	3.84699e-43	0.000569189	1092	38	0	218922	210.46	1	BT
M	PKD1	PVS1_VSSM	0.01	16	2089733	End_stage_renal_disease_CDK_stage_5	AFR__CSA__EUR__OTH	0.937932	+	-+++	113.492	3.84699e-43	0.000569189	1092	38	0	218922	210.46	1	BT
M	PKD1	PVS1_VSSMP	0.001	16	2089733	End_stage_renal_disease_CDK_stage_5	AFR__CSA__EUR__OTH	0.914209	+	-+++	113.492	3.84699e-43	0.000569189	1092	38	0	218922	210.46	1	BT
M	PKD1	PVS1_VSSMP	0.01	16	2089733	End_stage_renal_disease_CDK_stage_5	AFR__CSA__EUR__OTH	0.937932	+	-+++	113.492	3.84699e-43	0.000569189	1092	38	0	218922	210.46	1	BT
B	SLC22A2	P+LP+VUS_H+D	0.001	6	160217441	eGFR	AFR__AMR__CSA__EAS__EUR__OTH	0.885874	-	-+----	-3.89326	4.60408e-43	0.00207635	460450	1902.11	5				QT
B	APOC3	PVS1_VSSM	0.001	11	116830568	HDL	AFR__CSA__EAS__EUR__OTH	0.810108	+	+?+-++	0.306214	5.45871e-43	0.000347883	421119	291	1				QT
B	APOC3	PVS1_VSSM	0.01	11	116830568	HDL	AFR__CSA__EAS__EUR__OTH	0.86135	+	+?+-++	0.306214	5.45871e-43	0.000347883	421119	291	1				QT
M	WHRN	P	0.001	9	114402758	FAI	AFR__CSA__EUR	0.79363	+	-?-?+?	31.2699	7.42816e-43	0.000107897	185362	40	0				QT
M	WHRN	P	0.01	9	114402758	FAI	AFR__CSA__EUR	0.845248	+	-?-?+?	31.2699	7.42816e-43	0.000107897	185362	40	0				QT
B	GCK	P+LP+VUS_H+D	0.001	7	44145154	DM_All	AFR__AMR__CSA__EAS__EUR__OTH	1.0466	+	--++++	5.3951	8.8867e-43	0.000482686	44854	133	0	437861	333	0	BT
B	GCK	P+LP+VUS_H+D	0.01	7	44145154	DM_All	AFR__AMR__CSA__EAS__EUR__OTH	1.03977	+	--++++	5.3951	8.8867e-43	0.000482686	44854	133	0	437861	333	0	BT
F	PCSK9	PVS1_S	0.001	1	55039838	Apolipoprotein_B	EUR__OTH	0.986638	-	????-+	-0.193413	1.03045e-42	0.000565452	238747	270	0				QT
F	PCSK9	PVS1_S	0.01	1	55039838	Apolipoprotein_B	EUR__OTH	0.97542	-	????-+	-0.193413	1.03045e-42	0.000565452	238747	270	0				QT
M	PCSK9	P+LP+VUS_H	0.01	1	55039838	Cholesterol	AFR__CSA__EAS__EUR__OTH	0.993414	-	-?-+--	-0.593495	1.03651e-42	0.00162301	210800	684.26	0				QT
B	GCK	P+LP+VUS_H	singleton	7	44145154	HbA1c	AFR__AMR__CSA__EAS__EUR__OTH	0.826782	+	+-++++	8.38741	1.50204e-42	0.000127322	459465	117	0				QT
M	ALDH2	P+LP	0.001	12	111766952	FAI	EUR	0.79363	+	????+?	32.7466	1.58761e-42	0.000101027	178171	36	0				QT
M	ALDH2	P+LP	0.01	12	111766952	FAI	EUR	0.845248	+	????+?	32.7466	1.58761e-42	0.000101027	178171	36	0				QT
M	ALDH2	PVS1_VS	0.001	12	111766952	FAI	EUR	0.79363	+	????+?	32.7466	1.58761e-42	0.000101027	178171	36	0				QT
M	ALDH2	PVS1_VS	0.01	12	111766952	FAI	EUR	0.845248	+	????+?	32.7466	1.58761e-42	0.000101027	178171	36	0				QT
M	PHF20L1	P+LP+VUS_H	0.001	8	132777835	FAI	CSA__EUR__OTH	0.79363	+	??+?+-	27.007	1.64114e-42	0.00014845	188616	56	0				QT
M	PHF20L1	P+LP+VUS_H	0.01	8	132777835	FAI	CSA__EUR__OTH	0.845248	+	??+?+-	27.007	1.64114e-42	0.00014845	188616	56	0				QT
F	TSNARE1	PVS1_S	singleton	8	142229492	Testosterone	CSA__EUR	0.721949	+	??+?+?	4.087	1.661e-42	1.27285e-05	196409	5	0				QT
F	UGT2A1	P+LP	singleton	4	69589381	FAI	AFR__CSA__EAS__EUR__OTH	0.74068	+	-?-+++	3.42684	1.93229e-42	6.37785e-05	188115	24	0				QT
F	UGT2A1	PVS1_VS	singleton	4	69589381	FAI	AFR__CSA__EAS__EUR__OTH	0.74068	+	-?-+++	3.42684	1.93229e-42	6.37785e-05	188115	24	0				QT
B	ABCA1	P+LP+VUS_H	singleton	9	104784318	Apolipoprotein_A	AFR__CSA__EAS__EUR__OTH	0.748459	-	-?----	-0.275582	1.97126e-42	0.000292495	418810	245	0				QT
B	PNPLA1	P+LP	singleton	6	36270462	FAI	AFR__CSA__EAS__EUR__OTH	0.642733	+	-?--++	21.5305	2.11679e-42	6.99874e-05	380223	53.22	0				QT
B	NR1H3	P+LP+VUS_H	0.001	11	47259173	HDL	AFR__CSA__EAS__EUR__OTH	0.810108	+	+?+++-	0.165873	2.65286e-42	0.00116388	421119	978.26	1				QT
B	NR1H3	P+LP+VUS_H	0.01	11	47259173	HDL	AFR__CSA__EAS__EUR__OTH	0.86135	+	+?+++-	0.165873	2.65286e-42	0.00116388	421119	978.26	1				QT
M	SH2D2A	P+LP+VUS_H	0.001	1	156807181	Oestrodiol	EUR	0.728588	+	??+?	430.213	3.28462e-42	0.000211047	16584	7	0				QT
B	GCK	P+LP+VUS_H+D	singleton	7	44145154	HbA1c	AFR__AMR__CSA__EAS__EUR__OTH	0.826782	+	+-++++	8.16539	3.44273e-42	0.000132763	459465	122	0				QT
M	LYN	P+LP+VUS_H	0.01	8	55880105	FAI	AFR__AMR__CSA__EUR	0.845248	+	+--?+?	29.9588	3.81168e-42	0.000102404	185539	38	0				QT
M	UBXN2A	P+LP+VUS_H+D	singleton	2	23958298	Oestrodiol	EUR	0.624107	+	??+?	536.37	4.1466e-42	0.000176429	16584	5.85	0				QT
M	UBXN2A	P+LP+VUS_H+D	0.001	2	23958298	Oestrodiol	EUR	0.728588	+	??+?	536.37	4.1466e-42	0.000176429	16584	5.85	0				QT
M	UBXN2A	P+LP+VUS_H+D	0.01	2	23958298	Oestrodiol	EUR	0.831645	+	??+?	536.37	4.1466e-42	0.000176429	16584	5.85	0				QT
M	TMEM45B	P+LP+VUS_H+D	singleton	11	129852483	Oestrodiol	CSA__EUR__OTH	0.624107	+	?+++	170.78	4.35054e-42	0.00022668	17646	8	0				QT
B	ZC3H7B	D	0.001	22	41320664	Oestrodiol	AFR__CSA__OTH	0.889107	+	-+?+	1360.36	4.44074e-42	0.00107576	6507	12	1				QT
B	ZC3H7B	D	0.01	22	41320664	Oestrodiol	AFR__CSA__OTH	0.927274	+	-+?+	1360.36	4.44074e-42	0.00107576	6507	12	1				QT
B	CD36	PVS1_VSSMP	0.01	7	80646087	Apolipoprotein_A	AFR__AMR__CSA__EAS__EUR__OTH	0.670867	+	++++++	0.0618753	4.5619e-42	0.00534819	419314	4187.14	149				QT
B	LIPC	P+LP+VUS_H	0.01	15	58432041	HDL	AFR__AMR__CSA__EAS__EUR__OTH	0.86135	+	++++++	0.137706	4.80604e-42	0.00167935	421626	1416.12	0				QT
M	APOB	PVS1_VSSM	singleton	2	21001742	Cholesterol	AFR__CSA__EAS__EUR__OTH	0.934906	-	-?----	-1.5478	5.07118e-42	0.00023482	210800	99	0				QT
M	APOB	PVS1_VSSMP	singleton	2	21001742	Cholesterol	AFR__CSA__EAS__EUR__OTH	0.934906	-	-?----	-1.5478	5.07118e-42	0.00023482	210800	99	0				QT
B	LIPC	P+LP+VUS_H+D	0.001	15	58432041	Apolipoprotein_A	AFR__AMR__CSA__EAS__EUR__OTH	0.675979	+	++++++	0.0812778	5.1567e-42	0.00332008	419314	2780.32	2				QT
B	CD36	PVS1_VSSM	0.01	7	80646087	Apolipoprotein_A	AFR__AMR__CSA__EAS__EUR__OTH	0.670867	+	++++++	0.0619194	5.24032e-42	0.00533149	419314	4173.14	149				QT
B	CD36	PVS1_VSS	0.01	7	80646087	Apolipoprotein_A	AFR__AMR__CSA__EAS__EUR__OTH	0.670867	+	++++++	0.0619665	5.50833e-42	0.00531989	419314	4163.41	149				QT
M	PCSK9	D	0.001	1	55039838	LDL	AFR__CSA__EAS__EUR__OTH	0.972585	-	-?----	-0.393232	5.54522e-42	0.00208363	210347	874.57	1				QT
M	TCF24	P+LP	0.001	8	66948057	Oestrodiol	EUR	0.728588	+	??+?	429.138	5.56865e-42	0.000211047	16584	7	0				QT
M	TCF24	P+LP	0.01	8	66948057	Oestrodiol	EUR	0.831645	+	??+?	429.138	5.56865e-42	0.000211047	16584	7	0				QT
M	TCF24	PVS1_VS	0.001	8	66948057	Oestrodiol	EUR	0.728588	+	??+?	429.138	5.56865e-42	0.000211047	16584	7	0				QT
M	TCF24	PVS1_VS	0.01	8	66948057	Oestrodiol	EUR	0.831645	+	??+?	429.138	5.56865e-42	0.000211047	16584	7	0				QT
B	ANGPTL3	D	0.001	1	62597568	Triglycerides	AFR__AMR__CSA__EUR__OTH	1.02602	-	+--?--	-0.423319	6.13669e-42	0.00106733	458176	978.05	0				QT
B	ANGPTL3	D	0.01	1	62597568	Triglycerides	AFR__AMR__CSA__EUR__OTH	1.05552	-	+--?--	-0.423319	6.13669e-42	0.00106733	458176	978.05	0				QT
B	ASH1L	P+LP	singleton	1	155337668	FAI	CSA__EUR	0.642733	+	??-?+?	30.5687	7.26315e-42	3.19335e-05	360123	23	0				QT
M	HBB	P	0.01	11	5225487	HbA1c	AFR__AMR__CSA__EAS__EUR__OTH	0.937865	-	--++--	-5.63865	7.6679e-42	0.000805243	210295	338.68	0				QT
B	SLC22A7	P+LP+VUS_H+D	0.001	6	43298371	eGFR	AFR__CSA__EAS__EUR__OTH	0.885874	-	-?----	-3.94471	7.7142e-42	0.00213271	459902	1957.67	2				QT
B	SLC22A7	P+LP+VUS_H+D	0.01	6	43298371	eGFR	AFR__CSA__EAS__EUR__OTH	0.940088	-	-?----	-3.94471	7.7142e-42	0.00213271	459902	1957.67	2				QT
M	CYP2F1	P+LP+VUS_H	singleton	19	41116177	Oestrodiol	AFR__CSA__EUR__OTH	0.624107	+	-+++	100.805	7.86685e-42	0.000248385	18117	9	0				QT
B	NR1H3	P+LP+VUS_H+D	0.001	11	47259173	HDL	AFR__CSA__EAS__EUR__OTH	0.810108	+	+?+++-	0.15027	8.22251e-42	0.00140386	421119	1180.39	1				QT
B	NR1H3	P+LP+VUS_H+D	0.01	11	47259173	HDL	AFR__CSA__EAS__EUR__OTH	0.86135	+	+?+++-	0.15027	8.22251e-42	0.00140386	421119	1180.39	1				QT
B	MC4R	P+LP+VUS_H	0.001	18	60371355	BMI	AFR__AMR__CSA__EAS__EUR__OTH__TUR	1.03327	+	+++++++	1.67475	8.46025e-42	0.00142066	481763	1366.85	1				QT
B	MC4R	P+LP+VUS_H	0.01	18	60371355	BMI	AFR__AMR__CSA__EAS__EUR__OTH__TUR	1.08412	+	+++++++	1.67475	8.46025e-42	0.00142066	481763	1366.85	1				QT
F	APOB	P+LP	0.001	2	21001742	LDL	AFR__AMR__CSA__EAS__EUR__OTH	0.970828	-	-+-+--	-0.35181	9.3285e-42	0.00214054	249283	1067.2	0				QT
F	APOB	P+LP	0.01	2	21001742	LDL	AFR__AMR__CSA__EAS__EUR__OTH	0.979688	-	-+-+--	-0.35181	9.3285e-42	0.00214054	249283	1067.2	0				QT
B	LYN	P+LP+VUS_H+D	singleton	8	55880105	FAI	AFR__AMR__CSA__EAS__EUR__OTH	0.642733	+	-+--+-	18.1689	1.08821e-41	8.6692e-05	380658	66	0				QT
B	VPS33A	D	singleton	12	122232252	FAI	AFR__CSA__EAS__EUR__OTH	0.642733	+	-?-++-	18.939	1.09272e-41	7.89011e-05	380223	60	0				QT
F	APOB	P+LP+VUS_H	0.001	2	21001742	LDL	AFR__AMR__CSA__EAS__EUR__OTH	0.970828	-	-+-+--	-0.345447	1.09389e-41	0.00220473	249283	1099.2	0				QT
F	APOB	P+LP+VUS_H	0.01	2	21001742	LDL	AFR__AMR__CSA__EAS__EUR__OTH	0.979688	-	-+-+--	-0.345447	1.09389e-41	0.00220473	249283	1099.2	0				QT
B	LIPC	P+LP+VUS_H	0.001	15	58432041	HDL	AFR__AMR__CSA__EAS__EUR__OTH	0.810108	+	++++++	0.137785	1.10565e-41	0.00166157	421626	1401.12	0				QT
M	APOB	P+LP	0.001	2	21001742	Cholesterol	AFR__CSA__EAS__EUR__OTH	0.949009	-	-?---+	-0.535692	1.18612e-41	0.00191651	210800	806	1				QT
M	APOB	P+LP	0.01	2	21001742	Cholesterol	AFR__CSA__EAS__EUR__OTH	0.993414	-	-?---+	-0.535692	1.18612e-41	0.00191651	210800	806	1				QT
F	USP33	PVS1_VSSM	singleton	1	77697352	Testosterone	AFR__AMR__EUR__OTH	0.721949	+	--??+-	1.77623	1.20868e-41	5.646e-05	203684	23	0				QT
M	PCSK9	D	0.001	1	55039838	Apolipoprotein_B	AFR__CSA__EAS__EUR__OTH	0.961118	-	-?----	-0.109253	1.27204e-41	0.00208411	209339	870.57	1				QT
B	SLC34A3	D	0.01	9	137230939	eGFR	AFR__AMR__CSA__EAS__EUR__OTH	0.940088	-	--+---	-2.25274	1.61484e-41	0.00599594	460450	5515.66	3				QT
M	ZNF547	PVS1_VSSM	0.001	19	57368543	Oestrodiol	EUR	0.728588	+	??+?	325.542	1.88913e-41	0.000361795	16584	12	0				QT
M	ZNF547	PVS1_VSSMP	0.001	19	57368543	Oestrodiol	EUR	0.728588	+	??+?	325.542	1.88913e-41	0.000361795	16584	12	0				QT
M	LCAT	P+LP+VUS_H+D	0.001	16	67939916	Apolipoprotein_A	AFR__CSA__EAS__EUR__OTH	0.699283	-	-?----	-0.206662	1.8907e-41	0.000876487	194297	340.6	0				QT
M	LCAT	P+LP+VUS_H+D	0.01	16	67939916	Apolipoprotein_A	AFR__CSA__EAS__EUR__OTH	0.712529	-	-?----	-0.206662	1.8907e-41	0.000876487	194297	340.6	0				QT
M	DCUN1D3	P+LP+VUS_H	0.001	16	20859901	FAI	EUR__OTH	0.79363	+	????++	51.2113	1.89526e-41	4.06925e-05	184309	15	0				QT
M	DCUN1D3	P+LP+VUS_H	0.01	16	20859901	FAI	EUR__OTH	0.845248	+	????++	51.2113	1.89526e-41	4.06925e-05	184309	15	0				QT
B	APOC3	PVS1_VSS	0.001	11	116830568	HDL	AFR__CSA__EAS__EUR__OTH	0.810108	+	+?+-++	0.30702	2.06713e-41	0.000332448	421119	278	1				QT
B	APOC3	PVS1_VSS	0.01	11	116830568	HDL	AFR__CSA__EAS__EUR__OTH	0.86135	+	+?+-++	0.30702	2.06713e-41	0.000332448	421119	278	1				QT
M	LCAT	P+LP+VUS_H	0.001	16	67939916	HDL	AFR__CSA__EAS__EUR__OTH	0.840479	-	-?----	-0.317478	2.14265e-41	0.000541141	194586	210.6	0				QT
M	LCAT	P+LP+VUS_H	0.01	16	67939916	HDL	AFR__CSA__EAS__EUR__OTH	0.863301	-	-?----	-0.317478	2.14265e-41	0.000541141	194586	210.6	0				QT
B	GCK	D	0.001	7	44145154	Glucose	AFR__CSA__EAS__EUR__OTH	0.845615	+	+?+-++	1.04722	2.3969e-41	0.000370702	420823	312	0				QT
B	GCK	D	0.01	7	44145154	Glucose	AFR__CSA__EAS__EUR__OTH	0.845663	+	+?+-++	1.04722	2.3969e-41	0.000370702	420823	312	0				QT
F	LCAT	D	0.001	16	67939916	Apolipoprotein_A	AFR__CSA__EUR__OTH	0.661516	-	-?-?--	-0.2483	2.81016e-41	0.00079076	223203	353	0				QT
F	LCAT	D	0.01	16	67939916	Apolipoprotein_A	AFR__CSA__EUR__OTH	0.651155	-	-?-?--	-0.2483	2.81016e-41	0.00079076	223203	353	0				QT
F	LPL	D	0.01	8	19939442	Triglycerides	AFR__AMR__CSA__EAS__EUR__OTH	1.04889	+	+-++++	0.428271	2.87169e-41	0.0012863	249553	642	0				QT
B	ABCA1	D	0.001	9	104784318	Cholesterol	AFR__AMR__CSA__EAS__EUR__OTH	0.97357	-	-+----	-0.20455	3.58811e-41	0.00594916	460677	5467.28	7				QT
B	APOC3	P+LP	0.001	11	116830568	HDL	AFR__CSA__EAS__EUR__OTH	0.810108	+	+?+-++	0.307435	4.31323e-41	0.000328886	421119	275	1				QT
B	APOC3	P+LP	0.01	11	116830568	HDL	AFR__CSA__EAS__EUR__OTH	0.86135	+	+?+-++	0.307435	4.31323e-41	0.000328886	421119	275	1				QT
B	APOC3	PVS1_VS	0.001	11	116830568	HDL	AFR__CSA__EAS__EUR__OTH	0.810108	+	+?+-++	0.307435	4.31323e-41	0.000328886	421119	275	1				QT
B	APOC3	PVS1_VS	0.01	11	116830568	HDL	AFR__CSA__EAS__EUR__OTH	0.86135	+	+?+-++	0.307435	4.31323e-41	0.000328886	421119	275	1				QT
M	OR51C1P	P+LP+VUS_H+D	singleton	11	4690762	FAI	AFR__CSA__EUR__OTH	0.655588	+	-?-?+-	31.4819	4.40268e-41	0.000104439	191500	40	0				QT
F	PKD1	P	singleton	16	2089733	eGFR	CSA__EUR__OTH	0.864137	-	??-?--	-37.3838	4.92318e-41	4.10723e-05	243473	20	0				QT
F	LPL	D	0.001	8	19939442	Triglycerides	AFR__AMR__CSA__EAS__EUR__OTH	0.97581	+	+-++++	0.428663	5.2018e-41	0.00127829	249553	638	0				QT
B	IGF2R	D	0.01	6	159969247	Lipoprotein_A	AFR__AMR__CSA__EAS__EUR__OTH	0.947171	+	+-+-++	12.1481	5.87682e-41	0.00404005	368510	2953.6	12				QT
M	PCSK9	P+LP+VUS_H	0.001	1	55039838	Cholesterol	AFR__CSA__EAS__EUR__OTH	0.949009	-	-?-+--	-0.591695	6.2076e-41	0.00155897	210800	657.26	0				QT
F	TNFRSF18	P+LP	singleton	1	1203847	Testosterone	CSA__EUR__OTH	0.721949	+	??-?+-	3.32202	7.74974e-41	1.72368e-05	203054	7	0				QT
F	TNFRSF18	PVS1_VS	singleton	1	1203847	Testosterone	CSA__EUR__OTH	0.721949	+	??-?+-	3.32202	7.74974e-41	1.72368e-05	203054	7	0				QT
M	SLC34A3	P+LP+VUS_H	0.001	9	137230939	eGFR	AFR__CSA__EAS__EUR__OTH	0.903041	-	-?----	-4.23846	9.09054e-41	0.00352766	210684	1486.44	0				QT
M	SLC34A3	P+LP+VUS_H	0.01	9	137230939	eGFR	AFR__CSA__EAS__EUR__OTH	0.908182	-	-?----	-4.23846	9.09054e-41	0.00352766	210684	1486.44	0				QT
F	RNF128	P+LP+VUS_H+D	0.01	23	106726914	eGFR	AFR__AMR__CSA__EAS__EUR__OTH	0.87082	-	+-+---	-2.42046	9.24783e-41	0.00945781	249582	4671	25				QT
F	USP33	PVS1_VSSMP	singleton	1	77697352	Testosterone	AFR__AMR__EUR__OTH	0.721949	+	--??+-	1.72274	1.04418e-40	5.89148e-05	203684	24	0				QT
B	SCARB1	P+LP+VUS_H+D	0.001	12	124782684	Apolipoprotein_A	AFR__AMR__CSA__EAS__EUR__OTH	0.675979	+	+++-++	0.0896179	1.04648e-40	0.00264869	419314	2219.26	1				QT
B	SCARB1	P+LP+VUS_H+D	0.01	12	124782684	Apolipoprotein_A	AFR__AMR__CSA__EAS__EUR__OTH	0.670867	+	+++-++	0.0896179	1.04648e-40	0.00264869	419314	2219.26	1				QT
F	PDE3B	P+LP+VUS_H	0.01	11	14644077	Triglycerides	AFR__CSA__EAS__EUR__OTH	1.04889	-	-?++--	-0.343068	1.05151e-40	0.00210379	249189	1048.48	0				QT
F	APOC3	P+LP+VUS_H+D	0.001	11	116830568	Triglycerides	AFR__CSA__EAS__EUR__OTH	0.97581	-	-?----	-0.530922	1.24808e-40	0.000800597	249189	397	1				QT
F	APOC3	P+LP+VUS_H+D	0.01	11	116830568	Triglycerides	AFR__CSA__EAS__EUR__OTH	1.04889	-	-?----	-0.530922	1.24808e-40	0.000800597	249189	397	1				QT
F	SLC22A2	P+LP	0.01	6	160217441	eGFR	AFR__CSA__EAS__EUR__OTH	0.87082	-	-?----	-6.38514	1.24867e-40	0.00138032	249218	686	1				QT
B	CFAP74	P+LP	singleton	1	1922296	FAI	AFR__CSA__EAS__EUR__OTH	0.642733	+	+?+++-	15.5515	1.35681e-40	0.000114407	380223	87	0				QT
F	LIPC	D	0.01	15	58432041	Apolipoprotein_A	AFR__AMR__CSA__EAS__EUR__OTH	0.651155	+	+++-++	0.0932767	1.47722e-40	0.0054212	224840	2431.81	3				QT
B	PHF20L1	P+LP+VUS_H	0.001	8	132777835	FAI	CSA__EUR__OTH	0.817638	+	??+?+-	14.4401	1.49335e-40	0.000138353	372236	103	0				QT
B	PHF20L1	P+LP+VUS_H	0.01	8	132777835	FAI	CSA__EUR__OTH	0.864406	+	??+?+-	14.4401	1.49335e-40	0.000138353	372236	103	0				QT
F	BPIFB2	PVS1_S	0.001	20	33008575	FAI	EUR__OTH	0.860216	+	????+-	6.23508	1.64882e-40	6.08811e-05	180680	22	0				QT
F	BPIFB2	PVS1_S	0.01	20	33008575	FAI	EUR__OTH	0.940317	+	????+-	6.23508	1.64882e-40	6.08811e-05	180680	22	0				QT
F	SLC22A2	PVS1_VSS	0.01	6	160217441	eGFR	AFR__CSA__EAS__EUR__OTH	0.87082	-	-?----	-6.29318	1.79737e-40	0.00141442	249218	703	1				QT
B	LIPG	P+LP+VUS_H+D	0.001	18	49562320	HDL	AFR__AMR__CSA__EAS__EUR__OTH	0.810108	+	++++++	0.160475	1.79909e-40	0.00117448	421626	990.39	0				QT
B	LIPG	P+LP+VUS_H+D	0.01	18	49562320	HDL	AFR__AMR__CSA__EAS__EUR__OTH	0.86135	+	++++++	0.160475	1.79909e-40	0.00117448	421626	990.39	0				QT
F	G6PD	P	0.01	23	154532012	HbA1c	AFR__AMR__CSA__EAS__EUR__OTH	0.924101	-	----+-	-2.91096	1.83628e-40	0.00346938	249170	1540.93	94				QT
M	APOB	P+LP+VUS_H	0.001	2	21001742	Cholesterol	AFR__CSA__EAS__EUR__OTH	0.949009	-	-?----	-0.519908	2.02704e-40	0.00198145	210800	833.38	1				QT
M	APOB	P+LP+VUS_H	0.01	2	21001742	Cholesterol	AFR__CSA__EAS__EUR__OTH	0.993414	-	-?----	-0.519908	2.02704e-40	0.00198145	210800	833.38	1				QT
F	SLC22A2	PVS1_VS	0.01	6	160217441	eGFR	AFR__CSA__EAS__EUR__OTH	0.87082	-	-?----	-6.35313	2.06663e-40	0.00138634	249218	689	1				QT
F	ABCA1	P+LP+VUS_H+D	0.001	9	104784318	Cholesterol	AFR__AMR__CSA__EAS__EUR__OTH	0.950335	-	------	-0.264223	2.30659e-40	0.0061686	249693	3074.51	3				QT
B	ABCA1	P+LP+VUS_H	singleton	9	104784318	HDL	AFR__CSA__EAS__EUR__OTH	0.849394	-	-?----	-0.320991	2.37894e-40	0.000294454	421119	248	0				QT
B	LRP2	P+LP+VUS_H+D	0.001	2	169128696	eGFR	AFR__AMR__CSA__EAS__EUR__OTH	0.885874	+	+-++++	2.17104	2.486e-40	0.00637106	460450	5865.11	1				QT
B	DKK3	PVS1_S	0.001	11	11964474	FAI	AFR__CSA__EUR__OTH	0.817638	+	-?-?++	26.0032	2.7809e-40	4.49223e-05	378431	34	0				QT
B	DKK3	PVS1_S	0.01	11	11964474	FAI	AFR__CSA__EUR__OTH	0.864406	+	-?-?++	26.0032	2.7809e-40	4.49223e-05	378431	34	0				QT
M	RCN3	PVS1_M	0.001	19	49528475	FAI	CSA__EUR__OTH	0.79363	+	??+?+-	29.7439	3.03784e-40	0.000111337	188616	42	0				QT
B	SLC47A1	P+LP+VUS_H+D	0.01	17	19533940	eGFR	AFR__AMR__CSA__EAS__EUR__OTH	0.940088	-	-+----	-2.6698	3.18433e-40	0.00404015	460450	3706.58	7				QT
F	GCK	P+LP	0.001	7	44145154	Type_2_diabetes	CSA__EAS__EUR__OTH	1.00463	+	??++++	15.5122	3.23285e-40	0.000251131	16874	54	0	239964	75	0	BT
F	GCK	P+LP	0.01	7	44145154	Type_2_diabetes	CSA__EAS__EUR__OTH	1.01453	+	??++++	15.5122	3.23285e-40	0.000251131	16874	54	0	239964	75	0	BT
F	ABCA1	P+LP	0.001	9	104784318	Cholesterol	AFR__CSA__EAS__EUR__OTH	0.950335	-	-?-+--	-0.723006	3.27366e-40	0.00082117	249329	409.48	0				QT
F	ABCA1	P+LP	0.01	9	104784318	Cholesterol	AFR__CSA__EAS__EUR__OTH	0.946953	-	-?-+--	-0.723006	3.27366e-40	0.00082117	249329	409.48	0				QT
B	ANGPTL3	P+LP+VUS_H+D	0.001	1	62597568	LDL	AFR__AMR__CSA__EAS__EUR__OTH	0.994287	-	-+----	-0.259899	3.45428e-40	0.00209661	459814	1926.1	1				QT
B	ANGPTL3	P+LP+VUS_H+D	0.01	1	62597568	LDL	AFR__AMR__CSA__EAS__EUR__OTH	1.02789	-	-+----	-0.259899	3.45428e-40	0.00209661	459814	1926.1	1				QT
M	LIPC	D	0.01	15	58432041	Apolipoprotein_A	AFR__AMR__CSA__EAS__EUR__OTH	0.712529	+	--+-++	0.0780957	3.62093e-40	0.00581399	194474	2249.34	6				QT
F	SULT1C4	P+LP	0.001	2	108378338	FAI	AFR__EUR__OTH	0.860216	+	-???++	5.77188	3.69923e-40	6.79381e-05	183991	25	0				QT
F	SULT1C4	PVS1_VS	0.001	2	108378338	FAI	AFR__EUR__OTH	0.860216	+	-???++	5.77188	3.69923e-40	6.79381e-05	183991	25	0				QT
F	RNF128	D	0.01	23	106726914	eGFR	AFR__AMR__CSA__EAS__EUR__OTH	0.87082	-	+-+---	-2.41533	3.7337e-40	0.00935164	249582	4618	25				QT
B	PKD1	P+LP	0.001	16	2089733	CKD_All	AFR__AMR__CSA__EAS__EUR__OTH	1.00587	+	+++-+-	4.97984	4.09184e-40	0.000954053	25483	154.01	0	457232	765.06	1	BT
B	PKD1	P+LP	0.01	16	2089733	CKD_All	AFR__AMR__CSA__EAS__EUR__OTH	1.03466	+	+++-+-	4.97984	4.09184e-40	0.000954053	25483	154.01	0	457232	765.06	1	BT
B	PLG	D	0.01	6	160702316	Lipoprotein_A	AFR__AMR__CSA__EAS__EUR__OTH	0.947171	-	++-+-+	-5.65289	4.27617e-40	0.0175407	368510	12857.8	35				QT
F	PSMA7	PVS1_VSS	0.001	20	62136864	Testosterone	EUR	0.862809	+	????+?	3.15721	4.63573e-40	2.07102e-05	193142	8	0				QT
F	PSMA7	PVS1_VSS	0.01	20	62136864	Testosterone	EUR	0.873707	+	????+?	3.15721	4.63573e-40	2.07102e-05	193142	8	0				QT
F	HSD17B6	P+LP	singleton	12	56773854	HbA1c	AFR__EUR	0.751005	+	+???+?	27.4485	4.98134e-40	2.01478e-05	235328	9.48	0				QT
F	HSD17B6	PVS1_VS	singleton	12	56773854	HbA1c	AFR__EUR	0.751005	+	+???+?	27.4485	4.98134e-40	2.01478e-05	235328	9.48	0				QT
B	PKD1	P+LP+VUS_H	0.001	16	2089733	CKD_All	AFR__AMR__CSA__EAS__EUR__OTH	1.00587	+	+++-++	4.00299	5.05558e-40	0.00128344	25483	183.01	0	457232	1052.06	2	BT
B	PKD1	P+LP+VUS_H	0.01	16	2089733	CKD_All	AFR__AMR__CSA__EAS__EUR__OTH	1.03466	+	+++-++	4.00299	5.05558e-40	0.00128344	25483	183.01	0	457232	1052.06	2	BT
F	SLC22A2	PVS1_VSSM	0.01	6	160217441	eGFR	AFR__CSA__EAS__EUR__OTH	0.87082	-	-?-+--	-6.21617	5.22622e-40	0.00143248	249218	712	1				QT
F	SLC22A2	PVS1_VSSMP	0.01	6	160217441	eGFR	AFR__CSA__EAS__EUR__OTH	0.87082	-	-?-+--	-6.21617	5.22622e-40	0.00143248	249218	712	1				QT
M	PCSK9	PVS1_S	0.001	1	55039838	Cholesterol	AFR__EUR__OTH	0.949009	-	-???-+	-1.11516	5.46727e-40	0.000438172	205399	180	0				QT
M	PCSK9	PVS1_S	0.01	1	55039838	Cholesterol	AFR__EUR__OTH	0.993414	-	-???-+	-1.11516	5.46727e-40	0.000438172	205399	180	0				QT
F	UGT2A2	PVS1_VSS	singleton	4	69589394	FAI	AFR__CSA__EAS__EUR__OTH	0.74068	+	-?-+++	3.40216	5.67662e-40	7.70683e-05	188115	29	0				QT
M	SLC22A2	P+LP+VUS_H+D	0.01	6	160217441	eGFR	AFR__CSA__EAS__EUR__OTH	0.908182	-	-?----	-4.35105	5.893e-40	0.00331893	210684	1388.49	5				QT
B	RRP1	P+LP+VUS_H	singleton	21	43789631	FAI	AFR__CSA__EAS__EUR__OTH	0.642733	+	-?--+-	19.9966	6.05744e-40	7.3641e-05	380223	56	0				QT
F	GCK	P+LP	singleton	7	44145154	HbA1c	CSA__EAS__EUR	0.751005	+	??+++?	9.75728	6.53515e-40	0.000132854	237103	63	0				QT
B	PLG	P+LP+VUS_H+D	0.01	6	160702316	Lipoprotein_A	AFR__AMR__CSA__EAS__EUR__OTH	0.947171	-	++-+-+	-5.61687	7.20823e-40	0.0176669	368510	12950.8	35				QT
M	BCL6B	D	singleton	17	7023659	FAI	AFR__AMR__CSA__EUR__OTH	0.655588	+	+-+?+-	32.2412	7.51735e-40	9.30948e-05	191677	35.69	0				QT
M	APOB	P+LP+VUS_H+D	0.001	2	21001742	LDL	AFR__AMR__CSA__EAS__EUR__OTH	0.972585	-	-+----	-0.184923	8.10868e-40	0.0087365	210531	3654.61	12				QT
B	LRP2	P+LP+VUS_H+D	0.01	2	169128696	eGFR	AFR__AMR__CSA__EAS__EUR__OTH	0.940088	+	+-++++	2.14964	8.36602e-40	0.00644063	460450	5929.18	1				QT
M	PKD1	PVS1_VSS	0.001	16	2089733	End_stage_renal_disease_CDK_stage_5	AFR__CSA__EUR__OTH	0.914209	+	--++	124.1	1.10156e-39	0.0005351	1092	35	0	218922	198.46	1	BT
M	PKD1	PVS1_VSS	0.01	16	2089733	End_stage_renal_disease_CDK_stage_5	AFR__CSA__EUR__OTH	0.937932	+	--++	124.1	1.10156e-39	0.0005351	1092	35	0	218922	198.46	1	BT
M	FRYL	PVS1_VSS	singleton	4	48499431	Oestrodiol	EUR	0.624107	+	??+?	305.802	1.12474e-39	0.000391944	16584	13	0				QT
B	ZC3H7B	P+LP+VUS_H+D	0.001	22	41320664	Oestrodiol	AFR__CSA__OTH	0.889107	+	-+?+	1255.45	1.20471e-39	0.0011526	6507	13	1				QT
B	ZC3H7B	P+LP+VUS_H+D	0.01	22	41320664	Oestrodiol	AFR__CSA__OTH	0.927274	+	-+?+	1255.45	1.20471e-39	0.0011526	6507	13	1				QT
M	VPS33A	P+LP+VUS_H	singleton	12	122232252	FAI	CSA__EAS__EUR__OTH	0.655588	+	??-+++	30.3318	1.76199e-39	0.000105695	189224	40	0				QT
M	APOC3	P+LP+VUS_H+D	0.001	11	116830568	HDL	AFR__AMR__CSA__EAS__EUR__OTH	0.840479	+	+-+-++	0.25911	1.81251e-39	0.000721386	194764	281	0				QT
M	APOC3	P+LP+VUS_H+D	0.01	11	116830568	HDL	AFR__AMR__CSA__EAS__EUR__OTH	0.863301	+	+-+-++	0.25911	1.81251e-39	0.000721386	194764	281	0				QT
M	CEP57	P+LP+VUS_H+D	singleton	11	95790699	Oestrodiol	AFR__EUR__OTH	0.624107	+	+?++	166.949	2.15754e-39	0.000396354	17661	14	0				QT
F	APOB	P+LP+VUS_H+D	0.001	2	21001742	LDL	AFR__AMR__CSA__EAS__EUR__OTH	0.970828	-	-+----	-0.175319	2.44261e-39	0.00812302	249283	4047.86	1				QT
M	PTPRG	PVS1_VSSM	singleton	3	61562288	Oestrodiol	EUR__OTH	0.624107	+	??+-	271.461	2.63869e-39	0.000407213	17190	14	0				QT
M	PTPRG	PVS1_VSSMP	singleton	3	61562288	Oestrodiol	EUR__OTH	0.624107	+	??+-	271.461	2.63869e-39	0.000407213	17190	14	0				QT
M	PTPRG	PVS1_VSS	0.001	3	61562288	Oestrodiol	EUR	0.728588	+	??+?	293.235	2.75151e-39	0.000422094	16584	14	0				QT
B	CD36	P+LP+VUS_H+D	0.01	7	80646087	Apolipoprotein_A	AFR__AMR__CSA__EAS__EUR__OTH	0.670867	+	++++++	0.0646397	2.82063e-39	0.00498543	419314	4163.04	8.94				QT
F	APOB	PVS1_VSSM	0.001	2	21001742	Apolipoprotein_B	AFR__CSA__EAS__EUR__OTH	0.986638	-	-?----	-0.131285	3.95752e-39	0.00126633	248468	629.28	0				QT
F	APOB	PVS1_VSSM	0.01	2	21001742	Apolipoprotein_B	AFR__CSA__EAS__EUR__OTH	0.97542	-	-?----	-0.131285	3.95752e-39	0.00126633	248468	629.28	0				QT
F	APOB	PVS1_VSSMP	0.001	2	21001742	Apolipoprotein_B	AFR__CSA__EAS__EUR__OTH	0.986638	-	-?----	-0.131285	3.95752e-39	0.00126633	248468	629.28	0				QT
F	APOB	PVS1_VSSMP	0.01	2	21001742	Apolipoprotein_B	AFR__CSA__EAS__EUR__OTH	0.97542	-	-?----	-0.131285	3.95752e-39	0.00126633	248468	629.28	0				QT
M	LDLR	P+LP	0.001	19	11089550	LDL	AFR__CSA__EAS__EUR__OTH	0.972585	+	+?++++	0.434967	5.26495e-39	0.001592	210347	669.75	0				QT
M	LDLR	P+LP	0.01	19	11089550	LDL	AFR__CSA__EAS__EUR__OTH	0.994606	+	+?++++	0.434967	5.26495e-39	0.001592	210347	669.75	0				QT
M	PKD1	PVS1_VS	0.001	16	2089733	End_stage_renal_disease_CDK_stage_5	AFR__CSA__EUR__OTH	0.914209	+	--++	140.896	5.76352e-39	0.000457833	1092	33	0	218922	166.46	1	BT
M	PKD1	PVS1_VS	0.01	16	2089733	End_stage_renal_disease_CDK_stage_5	AFR__CSA__EUR__OTH	0.937932	+	--++	140.896	5.76352e-39	0.000457833	1092	33	0	218922	166.46	1	BT
B	GCK	P	0.001	7	44145154	Glucose	CSA__EUR__OTH	0.845615	+	??+?++	1.55305	8.60421e-39	0.000162611	412027	134	0				QT
B	GCK	P	0.01	7	44145154	Glucose	CSA__EUR__OTH	0.845663	+	??+?++	1.55305	8.60421e-39	0.000162611	412027	134	0				QT
M	RXRG	D	singleton	1	165401278	Oestrodiol	CSA__EUR	0.624107	+	?-+?	68.8265	9.32637e-39	0.000293427	17040	10	0				QT
B	CFAP74	PVS1_VSS	singleton	1	1922296	FAI	AFR__CSA__EAS__EUR__OTH	0.642733	+	+?+++-	14.7463	9.42945e-39	0.000120982	380223	92	0				QT
B	PKD1	P	singleton	16	2089733	eGFR	CSA__EUR__OTH	0.867997	-	??-?--	-28.7535	1.04645e-38	3.44178e-05	450349	31	0				QT
F	GCK	P+LP+VUS_H+D	0.001	7	44145154	Glucose	AFR__CSA__EAS__EUR__OTH	0.755319	+	+?+-++	1.105	1.08199e-38	0.000479316	226364	217	0				QT
F	GCK	P+LP+VUS_H+D	0.01	7	44145154	Glucose	AFR__CSA__EAS__EUR__OTH	0.749344	+	+?+-++	1.105	1.08199e-38	0.000479316	226364	217	0				QT
M	LPL	P+LP+VUS_H	0.001	8	19939442	HDL	AFR__CSA__EAS__EUR__OTH	0.840479	-	-?----	-0.191423	1.44983e-38	0.00135312	194586	526.6	0				QT
M	LPL	P+LP+VUS_H	0.01	8	19939442	HDL	AFR__CSA__EAS__EUR__OTH	0.863301	-	-?----	-0.191423	1.44983e-38	0.00135312	194586	526.6	0				QT
M	GLRA2	P+LP+VUS_H	0.001	23	14530066	FAI	AFR__CSA__EUR__OTH	0.79363	+	-?-?+-	15.4037	1.58774e-38	0.000208877	191500	0	40				QT
M	GLRA2	P+LP+VUS_H	0.01	23	14530066	FAI	AFR__CSA__EUR__OTH	0.845248	+	-?-?+-	15.4037	1.58774e-38	0.000208877	191500	0	40				QT
M	LPL	P+LP+VUS_H+D	0.001	8	19939442	HDL	AFR__CSA__EAS__EUR__OTH	0.840479	-	-?----	-0.182568	1.72942e-38	0.00147903	194586	575.6	0				QT
M	LPL	P+LP+VUS_H+D	0.01	8	19939442	HDL	AFR__CSA__EAS__EUR__OTH	0.863301	-	-?----	-0.182568	1.72942e-38	0.00147903	194586	575.6	0				QT
B	G6PD	D	0.001	23	154532012	HbA1c	AFR__AMR__CSA__EAS__EUR__OTH	0.94188	-	------	-1.57189	1.80998e-38	0.00278842	459465	1014.76	773.8				QT
B	GCK	P	singleton	7	44145154	HbA1c	AMR__CSA__EUR__OTH	0.826782	+	?-+?++	11.5401	1.97358e-38	6.09814e-05	450957	55	0				QT
F	GCK	P	0.001	7	44145154	Type_2_diabetes	CSA__EUR__OTH	1.00463	+	??+?++	21.4838	2.0127e-38	0.000166471	16748	43	0	238552	42	0	BT
F	GCK	P	0.01	7	44145154	Type_2_diabetes	CSA__EUR__OTH	1.01453	+	??+?++	21.4838	2.0127e-38	0.000166471	16748	43	0	238552	42	0	BT
B	SLC22A7	D	0.001	6	43298371	eGFR	AFR__CSA__EAS__EUR__OTH	0.885874	-	-?----	-3.99735	2.02259e-38	0.00191087	459902	1753.63	2				QT
B	SLC22A7	D	0.01	6	43298371	eGFR	AFR__CSA__EAS__EUR__OTH	0.940088	-	-?----	-3.99735	2.02259e-38	0.00191087	459902	1753.63	2				QT
B	OR4C15	PVS1_S	0.001	11	55554470	FAI	AFR__CSA__EUR__OTH	0.817638	+	+?+?++	16.4688	2.06894e-38	0.000100415	378431	76	0				QT
B	OR4C15	PVS1_VSS	0.001	11	55554470	FAI	AFR__CSA__EUR__OTH	0.817638	+	+?+?++	16.4688	2.06894e-38	0.000100415	378431	76	0				QT
F	GCK	P+LP+VUS_H	0.001	7	44145154	Glucose	AFR__CSA__EAS__EUR__OTH	0.755319	+	+?++++	1.25115	2.07232e-38	0.000371084	226364	168	0				QT
F	GCK	P+LP+VUS_H	0.01	7	44145154	Glucose	AFR__CSA__EAS__EUR__OTH	0.749344	+	+?++++	1.25115	2.07232e-38	0.000371084	226364	168	0				QT
F	GPR32	PVS1_S	0.001	19	50770615	Oestrodiol	CSA__EUR	0.954815	+	??+?+?	2824.36	2.20156e-38	4.75891e-05	52533	5	0				QT
F	GPR32	PVS1_VSS	0.001	19	50770615	Oestrodiol	CSA__EUR	0.954815	+	??+?+?	2824.36	2.20156e-38	4.75891e-05	52533	5	0				QT
F	ABCA1	P+LP+VUS_H+D	0.01	9	104784318	Cholesterol	AFR__AMR__CSA__EAS__EUR__OTH	0.946953	-	------	-0.186627	2.31307e-38	0.011698	249693	5823.84	9				QT
B	CFAP74	PVS1_VSSM	singleton	1	1922296	FAI	AFR__CSA__EAS__EUR__OTH	0.642733	+	+?+++-	14.5644	2.9995e-38	0.000122297	380223	93	0				QT
M	SOD1	P+LP+VUS_H+D	singleton	21	31659771	HbA1c	AFR__CSA__EUR	0.85299	+	+?-?+?	22.9438	3.17071e-38	5.42438e-05	202788	22	0				QT
F	ARPC3	PVS1_P	0.001	12	110435158	FAI	EUR__OTH	0.860216	+	????+-	10.7128	3.46179e-38	1.93713e-05	180680	7	0				QT
F	ARPC3	PVS1_P	0.01	12	110435158	FAI	EUR__OTH	0.940317	+	????+-	10.7128	3.46179e-38	1.93713e-05	180680	7	0				QT
M	PIGL	PVS1_S	0.001	17	16217227	FAI	AFR__EUR__OTH	0.79363	+	-???++	30.8838	4.02836e-38	9.88285e-05	187193	37	0				QT
M	PIGL	PVS1_S	0.01	17	16217227	FAI	AFR__EUR__OTH	0.845248	+	-???++	30.8838	4.02836e-38	9.88285e-05	187193	37	0				QT
B	CD36	P+LP+VUS_H+D	0.001	7	80646087	Apolipoprotein_A	AFR__AMR__CSA__EAS__EUR__OTH	0.675979	+	++++++	0.0642598	4.09837e-38	0.00488855	419314	4083.8	7.94				QT
M	APOC3	P+LP+VUS_H+D	0.001	11	116830568	Triglycerides	AFR__AMR__CSA__EAS__EUR__OTH	1.00585	-	------	-0.834588	4.56505e-38	0.000716468	210756	300	1				QT
M	APOC3	P+LP+VUS_H+D	0.01	11	116830568	Triglycerides	AFR__AMR__CSA__EAS__EUR__OTH	1.01197	-	------	-0.834588	4.56505e-38	0.000716468	210756	300	1				QT
M	LPL	P+LP	0.001	8	19939442	HDL	AFR__CSA__EAS__EUR__OTH	0.840479	-	-?----	-0.20586	5.64494e-38	0.00114756	194586	446.6	0				QT
M	LPL	P+LP	0.01	8	19939442	HDL	AFR__CSA__EAS__EUR__OTH	0.863301	-	-?----	-0.20586	5.64494e-38	0.00114756	194586	446.6	0				QT
B	G6PD	P+LP+VUS_H+D	0.001	23	154532012	HbA1c	AFR__AMR__CSA__EAS__EUR__OTH	0.94188	-	------	-1.48308	6.22028e-38	0.00301292	459465	1060.76	853.95				QT
M	HBB	P+LP	0.001	11	5225487	HbA1c	AFR__AMR__CSA__EAS__EUR__OTH	0.906261	-	--++--	-4.42839	7.0437e-38	0.000942127	210295	394.25	1				QT
F	RCAN1	PVS1_VSSMP	0.001	21	34518093	Testosterone	CSA__EUR	0.862809	+	??+?+?	2.71606	7.43975e-38	2.54571e-05	196409	10	0				QT
F	RCAN1	PVS1_VSSMP	0.01	21	34518093	Testosterone	CSA__EUR	0.873707	+	??+?+?	2.71606	7.43975e-38	2.54571e-05	196409	10	0				QT
F	GCK	P+LP	0.001	7	44145154	DM_All	CSA__EAS__EUR__OTH	1.0073	+	??++++	14.2358	8.09682e-38	0.000251131	17507	54	0	239331	75	0	BT
F	GCK	P+LP	0.01	7	44145154	DM_All	CSA__EAS__EUR__OTH	1.03678	+	??++++	14.2358	8.09682e-38	0.000251131	17507	54	0	239331	75	0	BT
B	APOB	P+LP+VUS_H+D	singleton	2	21001742	LDL	AFR__AMR__CSA__EAS__EUR__OTH	0.950882	-	-+----	-0.473541	8.802e-38	0.000600544	459814	552.28	0				QT
B	PKD2	P+LP	0.001	4	88007669	eGFR	AFR__CSA__EUR__OTH	0.885874	-	+?-?--	-19.0622	1.01507e-37	7.755e-05	457769	71	0				QT
B	PKD2	P+LP	0.01	4	88007669	eGFR	AFR__CSA__EUR__OTH	0.940088	-	+?-?--	-19.0622	1.01507e-37	7.755e-05	457769	71	0				QT
B	CETP	D	0.001	16	56961990	HDL	AFR__CSA__EAS__EUR__OTH	0.810108	+	+?++++	0.171912	1.14003e-37	0.000984282	421119	825	2				QT
B	CETP	D	0.01	16	56961990	HDL	AFR__CSA__EAS__EUR__OTH	0.86135	+	+?++++	0.171912	1.14003e-37	0.000984282	421119	825	2				QT
B	APOB	P+LP+VUS_H+D	0.001	2	21001742	Triglycerides	AFR__AMR__CSA__EAS__EUR__OTH	1.02602	-	------	-0.1453	1.14006e-37	0.00802617	460309	7385.04	2				QT
B	G6PD	P+LP+VUS_H	0.001	23	154532012	HbA1c	AFR__AMR__CSA__EAS__EUR__OTH	0.94188	-	------	-1.47854	1.17209e-37	0.00300095	459465	1055.76	850.95				QT
M	GCK	P+LP	0.001	7	44145154	HbA1c	AFR__CSA__EUR__OTH	0.906261	+	+?+?++	8.86598	1.23379e-37	0.000274532	209447	115	0				QT
M	LDLR	P+LP+VUS_H+D	0.001	19	11089550	Apolipoprotein_B	AFR__AMR__CSA__EAS__EUR__OTH	0.961118	+	-+++++	0.106735	1.29233e-37	0.00198013	209521	829.76	0				QT
M	LDLR	P+LP+VUS_H+D	0.01	19	11089550	Apolipoprotein_B	AFR__AMR__CSA__EAS__EUR__OTH	0.984477	+	-+++++	0.106735	1.29233e-37	0.00198013	209521	829.76	0				QT
B	PNPLA1	P+LP+VUS_H	singleton	6	36270462	FAI	AFR__CSA__EAS__EUR__OTH	0.642733	+	+?--++	17.9157	1.32904e-37	8.83977e-05	380223	67.22	0				QT
B	MRTFB	PVS1_M	0.001	16	14079288	FAI	AFR__EUR__OTH	0.817638	+	+???+-	30.7174	1.45304e-37	2.69408e-05	371184	20	0				QT
B	MRTFB	PVS1_M	0.01	16	14079288	FAI	AFR__EUR__OTH	0.864406	+	+???+-	30.7174	1.45304e-37	2.69408e-05	371184	20	0				QT
M	GCK	P+LP	0.01	7	44145154	HbA1c	AFR__AMR__CSA__EUR__OTH	0.937865	+	+++?++	8.71789	1.47496e-37	0.000276689	209622	116	0				QT
F	UGT2A2	PVS1_VSSM	singleton	4	69589394	FAI	AFR__CSA__EAS__EUR__OTH	0.74068	+	-?-+++	3.13148	1.57935e-37	8.23842e-05	188115	31	0				QT
F	UGT2A2	PVS1_VSSMP	singleton	4	69589394	FAI	AFR__CSA__EAS__EUR__OTH	0.74068	+	-?-+++	3.13148	1.57935e-37	8.23842e-05	188115	31	0				QT
B	LPL	P+LP+VUS_H+D	0.001	8	19939442	Apolipoprotein_A	AFR__AMR__CSA__EAS__EUR__OTH	0.675979	-	-+----	-0.114825	1.73265e-37	0.00148011	419314	1241.26	0				QT
B	LPL	P+LP+VUS_H+D	0.01	8	19939442	Apolipoprotein_A	AFR__AMR__CSA__EAS__EUR__OTH	0.670867	-	-+----	-0.114825	1.73265e-37	0.00148011	419314	1241.26	0				QT
M	LDLR	P	0.001	19	11089550	LDL	AFR__CSA__EAS__EUR__OTH	0.972585	+	+?++++	0.507971	1.93709e-37	0.00110916	210347	466.62	0				QT
M	LDLR	P	0.01	19	11089550	LDL	AFR__CSA__EAS__EUR__OTH	0.994606	+	+?++++	0.507971	1.93709e-37	0.00110916	210347	466.62	0				QT
B	MC4R	P+LP	0.001	18	60371355	BMI	AFR__AMR__CSA__EAS__EUR__OTH__TUR	1.03327	+	+++++++	1.63625	2.00838e-37	0.00132518	481763	1274.85	1				QT
B	MC4R	P+LP	0.01	18	60371355	BMI	AFR__AMR__CSA__EAS__EUR__OTH__TUR	1.08412	+	+++++++	1.63625	2.00838e-37	0.00132518	481763	1274.85	1				QT
M	GCK	P+LP+VUS_H	0.001	7	44145154	HbA1c	AFR__CSA__EUR__OTH	0.906261	+	+?+?++	7.19687	2.0277e-37	0.00041538	209447	174	0				QT
B	ANGPTL3	P	0.001	1	62597568	Triglycerides	AFR__AMR__EAS__EUR__OTH	1.02602	-	--?---	-0.535248	2.08257e-37	0.000611227	451551	552	0				QT
B	ANGPTL3	P	0.01	1	62597568	Triglycerides	AFR__AMR__EAS__EUR__OTH	1.05552	-	--?---	-0.535248	2.08257e-37	0.000611227	451551	552	0				QT
B	G6PD	P+LP	0.001	23	154532012	HbA1c	AFR__AMR__CSA__EAS__EUR__OTH	0.94188	-	------	-1.49588	2.09459e-37	0.00292118	459465	1032.76	825.8				QT
M	GCK	P+LP+VUS_H	0.01	7	44145154	HbA1c	AFR__AMR__CSA__EUR__OTH	0.937865	+	+++?++	7.12227	2.1167e-37	0.000417418	209622	175	0				QT
B	LDLR	PVS1_VSSM	0.001	19	11089550	DLP_All	AFR__CSA__EAS__EUR__OTH	0.98421	+	+?++++	9.8775	2.49821e-37	0.000155556	82422	89	0	399723	61	0	BT
B	LDLR	PVS1_VSSM	0.01	19	11089550	DLP_All	AFR__CSA__EAS__EUR__OTH	1.03856	+	+?++++	9.8775	2.49821e-37	0.000155556	82422	89	0	399723	61	0	BT
B	LDLR	PVS1_VSSMP	0.001	19	11089550	DLP_All	AFR__CSA__EAS__EUR__OTH	0.98421	+	+?++++	9.8775	2.49821e-37	0.000155556	82422	89	0	399723	61	0	BT
B	LDLR	PVS1_VSSMP	0.01	19	11089550	DLP_All	AFR__CSA__EAS__EUR__OTH	1.03856	+	+?++++	9.8775	2.49821e-37	0.000155556	82422	89	0	399723	61	0	BT
B	LPA	PVS1_VS	0.01	6	160531735	Lipoprotein_A	AFR__CSA__EAS__EUR__OTH	0.947171	-	-?-+--	-14.1597	2.56354e-37	0.00283907	368040	2085.78	2				QT
B	DECR2	PVS1_VS	singleton	16	401964	FAI	AFR__CSA__EUR__OTH	0.642733	+	+?+?++	22.4119	2.97856e-37	2.2754e-05	378431	17.22	0				QT
F	GCK	P+LP+VUS_H	singleton	7	44145154	HbA1c	AFR__CSA__EAS__EUR	0.751005	+	+?+++?	8.64424	3.10987e-37	0.000155726	240808	75	0				QT
B	LIPG	P+LP+VUS_H+D	0.001	18	49562320	Apolipoprotein_A	AFR__AMR__CSA__EAS__EUR__OTH	0.675979	+	++-+++	0.128767	3.39949e-37	0.00116191	419314	974.41	0				QT
B	LIPG	P+LP+VUS_H+D	0.01	18	49562320	Apolipoprotein_A	AFR__AMR__CSA__EAS__EUR__OTH	0.670867	+	++-+++	0.128767	3.39949e-37	0.00116191	419314	974.41	0				QT
M	ALDH2	PVS1_VSS	0.001	12	111766952	FAI	EUR__OTH	0.79363	+	????++	28.4598	3.59848e-37	0.000113939	184309	42	0				QT
M	ALDH2	PVS1_VSS	0.01	12	111766952	FAI	EUR__OTH	0.845248	+	????++	28.4598	3.59848e-37	0.000113939	184309	42	0				QT
F	GCK	P+LP+VUS_H+D	singleton	7	44145154	HbA1c	AFR__CSA__EAS__EUR__OTH	0.751005	+	+?+++-	8.3716	3.73537e-37	0.000160766	248809	80	0				QT
F	ANGPTL3	P+LP+VUS_H	0.001	1	62597568	Cholesterol	AFR__AMR__CSA__EAS__EUR__OTH	0.950335	-	------	-0.61008	3.81875e-37	0.00105129	249693	523	1				QT
F	ANGPTL3	P+LP+VUS_H	0.01	1	62597568	Cholesterol	AFR__AMR__CSA__EAS__EUR__OTH	0.946953	-	------	-0.61008	3.81875e-37	0.00105129	249693	523	1				QT
F	LCAT	P+LP	0.001	16	67939916	HDL	AFR__CSA__EUR__OTH	0.821987	-	-?-?--	-0.445985	3.99554e-37	0.000321929	225205	145	0				QT
F	LCAT	P+LP	0.01	16	67939916	HDL	AFR__CSA__EUR__OTH	0.812249	-	-?-?--	-0.445985	3.99554e-37	0.000321929	225205	145	0				QT
B	ANGPTL3	P	0.001	1	62597568	Cholesterol	AFR__AMR__EAS__EUR__OTH	0.97357	-	--?---	-0.609975	4.30748e-37	0.000610741	451910	552	0				QT
B	ANGPTL3	P	0.01	1	62597568	Cholesterol	AFR__AMR__EAS__EUR__OTH	0.997683	-	--?---	-0.609975	4.30748e-37	0.000610741	451910	552	0				QT
F	PCSK9	PVS1_S	0.001	1	55039838	Cholesterol	EUR__OTH	0.950335	-	????--	-0.841267	4.69053e-37	0.000582369	239539	279	0				QT
F	PCSK9	PVS1_S	0.01	1	55039838	Cholesterol	EUR__OTH	0.946953	-	????--	-0.841267	4.69053e-37	0.000582369	239539	279	0				QT
B	LPL	P+LP+VUS_H	0.001	8	19939442	Apolipoprotein_A	AFR__CSA__EAS__EUR__OTH	0.675979	-	-?----	-0.119701	4.69898e-37	0.00135176	418810	1132.26	0				QT
B	LPL	P+LP+VUS_H	0.01	8	19939442	Apolipoprotein_A	AFR__CSA__EAS__EUR__OTH	0.670867	-	-?----	-0.119701	4.69898e-37	0.00135176	418810	1132.26	0				QT
M	OR8I2	P+LP+VUS_H+D	singleton	11	56093308	Oestrodiol	AFR__EUR	0.624107	+	+?+?	166.931	5.26924e-37	0.000234535	17055	8	0				QT
F	PLG	P+LP+VUS_H	0.01	6	160702316	Lipoprotein_A	AFR__AMR__CSA__EUR__OTH	0.914732	-	-++?--	-12.557	5.54974e-37	0.00651879	199040	2577	9				QT
M	LCAT	D	0.001	16	67939916	Apolipoprotein_A	AFR__CSA__EUR__OTH	0.699283	-	-?-?--	-0.20716	6.07809e-37	0.000771884	193682	299	0				QT
M	LCAT	D	0.01	16	67939916	Apolipoprotein_A	AFR__CSA__EUR__OTH	0.712529	-	-?-?--	-0.20716	6.07809e-37	0.000771884	193682	299	0				QT
M	HBB	P+LP+VUS_H	0.001	11	5225487	HbA1c	AFR__AMR__CSA__EAS__EUR__OTH	0.906261	-	--++--	-4.25776	6.4545e-37	0.000963525	210295	403.25	1				QT
B	BSND	PVS1_S	singleton	1	54999187	FAI	AFR__EUR	0.642733	+	-???+?	43.7125	6.45728e-37	1.25323e-05	359071	9	0				QT
B	SLC22A2	D	0.001	6	160217441	eGFR	AFR__AMR__CSA__EAS__EUR__OTH	0.885874	-	-+----	-3.77914	6.49443e-37	0.00184723	460450	1697.11	2				QT
B	SLC22A2	D	0.01	6	160217441	eGFR	AFR__AMR__CSA__EAS__EUR__OTH	0.940088	-	-+----	-3.77914	6.49443e-37	0.00184723	460450	1697.11	2				QT
B	LCAT	P	0.001	16	67939916	HDL	AFR__CSA__EUR__OTH	0.810108	-	-?-?--	-0.4112	6.61605e-37	0.000168188	419175	141	0				QT
B	LCAT	P	0.01	16	67939916	HDL	AFR__CSA__EUR__OTH	0.86135	-	-?-?--	-0.4112	6.61605e-37	0.000168188	419175	141	0				QT
F	GCK	P	singleton	7	44145154	HbA1c	CSA__EUR	0.751005	+	??+?+?	12.0924	7.07433e-37	8.06311e-05	235641	38	0				QT
B	SCARB1	D	0.001	12	124782684	Apolipoprotein_A	AFR__AMR__CSA__EAS__EUR__OTH	0.675979	+	+++-++	0.0879254	7.10845e-37	0.00247905	419314	2077	1				QT
B	SCARB1	D	0.01	12	124782684	Apolipoprotein_A	AFR__AMR__CSA__EAS__EUR__OTH	0.670867	+	+++-++	0.0879254	7.10845e-37	0.00247905	419314	2077	1				QT
F	PCSK9	D	0.001	1	55039838	LDL	AFR__CSA__EAS__EUR__OTH	0.970828	-	-?----	-0.346434	7.4408e-37	0.00191725	248919	954.48	0				QT
B	PLA2G12A	D	0.01	4	109714392	Apolipoprotein_A	AFR__AMR__CSA__EAS__EUR__OTH	0.670867	-	+-----	-0.0460279	7.48859e-37	0.00908302	419314	7569.27	24				QT
B	PLA2G12A	P+LP+VUS_H+D	0.01	4	109714392	Apolipoprotein_A	AFR__AMR__CSA__EAS__EUR__OTH	0.670867	-	+-----	-0.0456601	7.55833e-37	0.0092273	419314	7690.27	24				QT
B	PCDH15	PVS1_VS	0.001	10	53806579	Oestrodiol	AFR__CSA	0.889107	+	++??	1775.35	8.19529e-37	0.000846979	3542	6	0				QT
B	SLC47A1	D	0.01	17	19533940	eGFR	AFR__AMR__CSA__EAS__EUR__OTH	0.940088	-	-+----	-2.77536	8.21433e-37	0.00339901	460450	3122.15	4				QT
F	ANGPTL3	PVS1_VSS	0.001	1	62597568	Cholesterol	AFR__AMR__CSA__EAS__EUR__OTH	0.950335	-	------	-0.60944	8.40165e-37	0.00104328	249693	519	1				QT
F	ANGPTL3	PVS1_VSS	0.01	1	62597568	Cholesterol	AFR__AMR__CSA__EAS__EUR__OTH	0.946953	-	------	-0.60944	8.40165e-37	0.00104328	249693	519	1				QT
F	ANGPTL3	PVS1_VSSM	0.001	1	62597568	Cholesterol	AFR__AMR__CSA__EAS__EUR__OTH	0.950335	-	------	-0.603384	9.24372e-37	0.00106331	249693	529	1				QT
F	ANGPTL3	PVS1_VSSM	0.01	1	62597568	Cholesterol	AFR__AMR__CSA__EAS__EUR__OTH	0.946953	-	------	-0.603384	9.24372e-37	0.00106331	249693	529	1				QT
F	ANGPTL3	PVS1_VSSMP	0.001	1	62597568	Cholesterol	AFR__AMR__CSA__EAS__EUR__OTH	0.950335	-	------	-0.603384	9.24372e-37	0.00106331	249693	529	1				QT
F	ANGPTL3	PVS1_VSSMP	0.01	1	62597568	Cholesterol	AFR__AMR__CSA__EAS__EUR__OTH	0.946953	-	------	-0.603384	9.24372e-37	0.00106331	249693	529	1				QT
B	CFAP74	PVS1_VSSMP	singleton	1	1922296	FAI	AFR__CSA__EAS__EUR__OTH	0.642733	+	+?+++-	14.0453	9.61951e-37	0.000127557	380223	97	0				QT
B	DECR2	P+LP	singleton	16	401964	FAI	AFR__CSA__EUR__OTH	0.642733	+	+?+?++	21.9733	9.76602e-37	2.40753e-05	378431	18.22	0				QT
M	CEP57	P+LP+VUS_H+D	0.001	11	95790699	Oestrodiol	EUR__OTH	0.728588	+	??++	256.672	1.11566e-36	0.0004363	17190	15	0				QT
M	OR6N2	D	singleton	1	158776685	FAI	AFR__CSA__EUR__OTH	0.655588	+	-?-?+-	36.5665	1.40476e-36	7.5718e-05	191500	29	0				QT
B	IGF2R	P+LP+VUS_H+D	0.01	6	159969247	Lipoprotein_A	AFR__AMR__CSA__EAS__EUR__OTH	0.947171	+	+-+-++	10.8045	1.43013e-36	0.00453056	368510	3311.11	14				QT
M	LIPC	D	0.01	15	58432041	HDL	AFR__AMR__CSA__EAS__EUR__OTH	0.863301	+	--++++	0.0880606	1.49995e-36	0.00583611	194764	2261.33	6				QT
M	FRYL	PVS1_VSSM	singleton	4	48499431	Oestrodiol	EUR	0.624107	+	??+?	282.209	1.55855e-36	0.000422094	16584	14	0				QT
M	FRYL	PVS1_VSSMP	singleton	4	48499431	Oestrodiol	EUR	0.624107	+	??+?	282.209	1.55855e-36	0.000422094	16584	14	0				QT
F	LHFPL6	P+LP+VUS_H	singleton	13	39343939	HbA1c	AFR__AMR__EUR__OTH	0.751005	+	-+??+-	20.4455	1.57132e-36	2.66732e-05	243690	13	0				QT
B	PLA2G12A	P+LP+VUS_H+D	0.01	4	109714392	SHBG	AFR__AMR__CSA__EAS__EUR__OTH	0.934308	+	--+-++	3.71986	1.57631e-36	0.00918579	417780	7627.28	24				QT
M	HBB	P+LP+VUS_H+D	0.001	11	5225487	HbA1c	AFR__AMR__CSA__EAS__EUR__OTH	0.906261	-	--++--	-4.07963	1.75461e-36	0.00100632	210295	421.25	1				QT
M	ZNF547	P+LP+VUS_H	0.001	19	57368543	Oestrodiol	EUR	0.728588	+	??+?	281.514	2.21297e-36	0.000422094	16584	14	0				QT
B	RMDN3	P+LP+VUS_H+D	singleton	15	40736544	FAI	AFR__CSA__EAS__EUR__OTH	0.642733	+	-?--++	16.9446	2.36348e-36	8.54762e-05	380223	65	0				QT
B	PCSK9	PVS1_VS	0.01	1	55039838	Cholesterol	AFR__AMR__CSA__EAS__EUR__OTH	0.997683	-	------	-0.840283	2.39481e-36	0.000312804	460677	288.2	0				QT
M	SHBG	D	0.001	17	7630196	FAI	AFR__CSA__EUR__OTH	0.79363	+	+?+?++	17.0793	2.60666e-36	0.000321149	191500	123	0				QT
M	SHBG	D	0.01	17	7630196	FAI	AFR__CSA__EUR__OTH	0.845248	+	+?+?++	17.0793	2.60666e-36	0.000321149	191500	123	0				QT
F	GCK	P	0.001	7	44145154	DM_All	CSA__EUR__OTH	1.0073	+	??+?++	19.1647	2.74257e-36	0.000166471	17376	43	0	237924	42	0	BT
F	GCK	P	0.01	7	44145154	DM_All	CSA__EUR__OTH	1.03678	+	??+?++	19.1647	2.74257e-36	0.000166471	17376	43	0	237924	42	0	BT
M	OR8I2	P+LP+VUS_H	0.001	11	56093308	Oestrodiol	EUR	0.728588	+	??+?	371.552	3.09472e-36	0.000241196	16584	8	0				QT
M	OR8I2	P+LP+VUS_H	0.01	11	56093308	Oestrodiol	EUR	0.831645	+	??+?	371.552	3.09472e-36	0.000241196	16584	8	0				QT
B	G6PD	D	0.01	23	154532012	HbA1c	AFR__AMR__CSA__EAS__EUR__OTH	0.968316	-	------	-1.11529	3.15439e-36	0.00438229	459465	1823.89	1101.56				QT
F	GCK	P+LP+VUS_H	0.001	7	44145154	Type_2_diabetes	AFR__CSA__EAS__EUR__OTH	1.00463	+	-?++++	9.97431	3.36738e-36	0.000378699	17728	64	0	243693	134	0	BT
F	GCK	P+LP+VUS_H	0.01	7	44145154	Type_2_diabetes	AFR__CSA__EAS__EUR__OTH	1.01453	+	-?++++	9.97431	3.36738e-36	0.000378699	17728	64	0	243693	134	0	BT
M	RXRG	D	0.001	1	165401278	Oestrodiol	EUR	0.728588	+	??+?	315.956	5.02419e-36	0.000331645	16584	11	0				QT
F	APOB	P+LP+VUS_H+D	0.001	2	21001742	Apolipoprotein_B	AFR__AMR__CSA__EAS__EUR__OTH	0.986638	-	-+----	-0.046658	5.50373e-36	0.00781603	248830	3887.73	1				QT
B	CD36	P+LP+VUS_H	0.01	7	80646087	Apolipoprotein_A	AFR__AMR__CSA__EAS__EUR__OTH	0.670867	+	++++++	0.0683693	5.52136e-36	0.00406929	419314	3396.62	8				QT
M	LDLR	P+LP+VUS_H	0.001	19	11089550	Apolipoprotein_B	AFR__AMR__CSA__EAS__EUR__OTH	0.961118	+	-+++++	0.107696	5.56679e-36	0.00185843	209521	778.76	0				QT
M	LDLR	P+LP+VUS_H	0.01	19	11089550	Apolipoprotein_B	AFR__AMR__CSA__EAS__EUR__OTH	0.984477	+	-+++++	0.107696	5.56679e-36	0.00185843	209521	778.76	0				QT
B	GCK	PVS1_VSS	0.001	7	44145154	HbA1c	CSA__EUR__OTH	0.94188	+	??+?++	12.1756	5.65131e-36	5.21734e-05	450421	47	0				QT
B	GCK	PVS1_VSS	0.01	7	44145154	HbA1c	CSA__EUR__OTH	0.968316	+	??+?++	12.1756	5.65131e-36	5.21734e-05	450421	47	0				QT
B	GCK	PVS1_VSSM	0.001	7	44145154	HbA1c	CSA__EUR__OTH	0.94188	+	??+?++	12.1756	5.65131e-36	5.21734e-05	450421	47	0				QT
B	GCK	PVS1_VSSM	0.01	7	44145154	HbA1c	CSA__EUR__OTH	0.968316	+	??+?++	12.1756	5.65131e-36	5.21734e-05	450421	47	0				QT
B	OR4C15	P+LP+VUS_H	0.001	11	55554470	FAI	AFR__CSA__EUR__OTH	0.817638	+	+?+?++	15.5761	5.7992e-36	0.000104378	378431	79	0				QT
B	OR4C15	P+LP+VUS_H	0.01	11	55554470	FAI	AFR__CSA__EUR__OTH	0.864406	+	+?+?++	15.5761	5.7992e-36	0.000104378	378431	79	0				QT
M	SCARB1	P+LP+VUS_H	0.001	12	124782684	HDL	AFR__CSA__EAS__EUR__OTH	0.840479	+	-?++++	0.212014	6.16202e-36	0.00101908	194586	396.6	0				QT
M	SCARB1	P+LP+VUS_H	0.01	12	124782684	HDL	AFR__CSA__EAS__EUR__OTH	0.863301	+	-?++++	0.212014	6.16202e-36	0.00101908	194586	396.6	0				QT
B	LPL	P+LP	0.001	8	19939442	Apolipoprotein_A	AFR__CSA__EAS__EUR__OTH	0.675979	-	-?----	-0.12739	8.31962e-36	0.0011512	418810	964.26	0				QT
B	LPL	P+LP	0.01	8	19939442	Apolipoprotein_A	AFR__CSA__EAS__EUR__OTH	0.670867	-	-?----	-0.12739	8.31962e-36	0.0011512	418810	964.26	0				QT
F	HNF1A	P	0.001	12	120978769	HbA1c	EAS__EUR	0.921872	+	???-+?	11.8451	8.89092e-36	7.7225e-05	233085	36	0				QT
F	HNF1A	P	0.01	12	120978769	HbA1c	EAS__EUR	0.924101	+	???-+?	11.8451	8.89092e-36	7.7225e-05	233085	36	0				QT
F	UGT2A1	PVS1_VSS	singleton	4	69589381	FAI	AFR__CSA__EAS__EUR__OTH	0.74068	+	-?-+++	2.97553	9.57918e-36	8.23842e-05	188115	31	0				QT
B	CD36	PVS1_VS	0.01	7	80646087	Apolipoprotein_A	AFR__AMR__CSA__EAS__EUR__OTH	0.670867	+	++++++	0.0608727	9.61184e-36	0.00470411	419314	3653	146				QT
M	TAFAZZIN	PVS1_VSSM	0.001	23	154411861	FAI	CSA__EUR__OTH	0.79363	+	??+?++	25.3653	1.05053e-35	5.83195e-05	188616	0	11				QT
M	TAFAZZIN	PVS1_VSSM	0.01	23	154411861	FAI	CSA__EUR__OTH	0.845248	+	??+?++	25.3653	1.05053e-35	5.83195e-05	188616	0	11				QT
M	TAFAZZIN	PVS1_VSSMP	0.001	23	154411861	FAI	CSA__EUR__OTH	0.79363	+	??+?++	25.3653	1.05053e-35	5.83195e-05	188616	0	11				QT
M	TAFAZZIN	PVS1_VSSMP	0.01	23	154411861	FAI	CSA__EUR__OTH	0.845248	+	??+?++	25.3653	1.05053e-35	5.83195e-05	188616	0	11				QT
M	CEP57	P+LP+VUS_H+D	0.01	11	95790699	Oestrodiol	AFR__EUR__OTH	0.831645	+	+?++	157.271	1.07607e-35	0.000452975	17661	16	0				QT
F	APOA5	P	0.001	11	116790137	Triglycerides	EUR	0.97581	+	????+?	0.891216	1.2827e-35	0.000291783	231336	135	0				QT
F	APOA5	P	0.01	11	116790137	Triglycerides	EUR	1.04889	+	????+?	0.891216	1.2827e-35	0.000291783	231336	135	0				QT
F	HNF1A	P	singleton	12	120978769	Glucose	EUR	0.584735	+	????+?	3.28499	1.30515e-35	5.23388e-05	210169	22	0				QT
B	STOM	PVS1_M	0.001	9	121341205	FAI	EUR__OTH	0.817638	+	????+-	20.918	1.39944e-35	5.61662e-05	364988	41	0				QT
B	STOM	PVS1_M	0.01	9	121341205	FAI	EUR__OTH	0.864406	+	????+-	20.918	1.39944e-35	5.61662e-05	364988	41	0				QT
B	GLRA2	D	0.001	23	14530066	FAI	AFR__CSA__EAS__EUR__OTH	0.817638	+	-?-++-	7.3293	1.49196e-35	0.000378725	380223	68	110				QT
B	GLRA2	D	0.01	23	14530066	FAI	AFR__CSA__EAS__EUR__OTH	0.864406	+	-?-++-	7.3293	1.49196e-35	0.000378725	380223	68	110				QT
B	PKD1	PVS1_VSSM	0.001	16	2089733	CKD_All	AFR__CSA__EAS__EUR__OTH	1.00587	+	+?+-+-	6.09634	1.90818e-35	0.00057355	25471	110.01	0	456674	439.06	2	BT
B	PKD1	PVS1_VSSM	0.01	16	2089733	CKD_All	AFR__CSA__EAS__EUR__OTH	1.03466	+	+?+-+-	6.09634	1.90818e-35	0.00057355	25471	110.01	0	456674	439.06	2	BT
B	PKD1	PVS1_VSSMP	0.001	16	2089733	CKD_All	AFR__CSA__EAS__EUR__OTH	1.00587	+	+?+-+-	6.09634	1.90818e-35	0.00057355	25471	110.01	0	456674	439.06	2	BT
B	PKD1	PVS1_VSSMP	0.01	16	2089733	CKD_All	AFR__CSA__EAS__EUR__OTH	1.03466	+	+?+-+-	6.09634	1.90818e-35	0.00057355	25471	110.01	0	456674	439.06	2	BT
F	G6PD	P+LP+VUS_H+D	0.01	23	154532012	HbA1c	AFR__AMR__CSA__EAS__EUR__OTH	0.924101	-	------	-1.25912	1.92957e-35	0.00704434	249170	3308.47	101				QT
B	NR1H3	P+LP	0.001	11	47259173	HDL	AFR__CSA__EAS__EUR__OTH	0.810108	+	+?-+++	0.169438	1.94351e-35	0.000924917	421119	777	1				QT
B	NR1H3	P+LP	0.01	11	47259173	HDL	AFR__CSA__EAS__EUR__OTH	0.86135	+	+?-+++	0.169438	1.94351e-35	0.000924917	421119	777	1				QT
F	PDE3B	P+LP+VUS_H+D	0.001	11	14644077	HDL	AFR__AMR__CSA__EAS__EUR__OTH	0.821987	+	--+-++	0.148688	1.98262e-35	0.00269367	226862	1222.18	0				QT
B	PKD2	PVS1_VSSM	0.001	4	88007669	eGFR	AFR__CSA__EUR__OTH	0.885874	-	+?-?--	-18.7406	2.06402e-35	7.42733e-05	457769	68	0				QT
B	PKD2	PVS1_VSSM	0.01	4	88007669	eGFR	AFR__CSA__EUR__OTH	0.940088	-	+?-?--	-18.7406	2.06402e-35	7.42733e-05	457769	68	0				QT
B	NR1H3	PVS1_VSSMP	0.01	11	47259173	HDL	AFR__AMR__CSA__EAS__EUR__OTH	0.86135	+	+-++++	0.0892555	2.5057e-35	0.00333961	421626	2812.13	2				QT
F	G6PD	P+LP+VUS_H	0.01	23	154532012	HbA1c	AFR__AMR__CSA__EAS__EUR__OTH	0.924101	-	------	-1.25667	2.6604e-35	0.0070323	249170	3302.47	101				QT
B	PKD1	P+LP+VUS_H+D	0.01	16	2089733	End_stage_renal_disease_CDK_stage_5	AFR__CSA__EUR__OTH	0.961236	+	++++	3.82858	3.06435e-35	0.0169712	1706	167.01	0	478191	16071.8	25	BT
F	GSX1	P+LP+VUS_H+D	0.001	13	27792696	Oestrodiol	AFR__EUR	0.954815	+	+???+?	2267.09	3.25695e-35	5.67301e-05	52882	6	0				QT
F	GSX1	D	0.001	13	27792696	Oestrodiol	AFR__EUR	0.954815	+	+???+?	2267.09	3.25695e-35	5.67301e-05	52882	6	0				QT
M	SLC34A3	P+LP+VUS_H+D	0.01	9	137230939	eGFR	AFR__AMR__CSA__EAS__EUR__OTH	0.908182	-	-+----	-2.79311	3.44533e-35	0.00709236	210868	2989.1	1				QT
B	APOA1	P+LP+VUS_H	0.001	11	116835821	Apolipoprotein_A	AFR__CSA__EUR__OTH	0.675979	-	-?-?--	-0.477368	3.6659e-35	8.03579e-05	416885	67	0				QT
B	APOA1	P+LP+VUS_H	0.01	11	116835821	Apolipoprotein_A	AFR__CSA__EUR__OTH	0.670867	-	-?-?--	-0.477368	3.6659e-35	8.03579e-05	416885	67	0				QT
B	ABCA1	P+LP+VUS_H+D	singleton	9	104784318	HDL	AFR__CSA__EAS__EUR__OTH	0.849394	-	-?----	-0.225362	4.02386e-35	0.00051798	421119	436.26	0				QT
B	STIM1	PVS1_VS	0.001	11	3856279	FAI	EUR__OTH	0.817638	+	????++	27.2101	4.07585e-35	3.28777e-05	364989	24	0				QT
B	STIM1	PVS1_VS	0.01	11	3856279	FAI	EUR__OTH	0.864406	+	????++	27.2101	4.07585e-35	3.28777e-05	364989	24	0				QT
M	STIM1	PVS1_VS	0.001	11	3856279	FAI	EUR__OTH	0.79363	+	????++	50.4461	4.31364e-35	3.52669e-05	184309	13	0				QT
M	STIM1	PVS1_VS	0.01	11	3856279	FAI	EUR__OTH	0.845248	+	????++	50.4461	4.31364e-35	3.52669e-05	184309	13	0				QT
F	PCSK9	D	0.001	1	55039838	Apolipoprotein_B	AFR__CSA__EAS__EUR__OTH	0.986638	-	-?----	-0.0927763	4.58492e-35	0.0019147	248468	951.48	0				QT
F	GCK	D	0.001	7	44145154	Glucose	AFR__CSA__EAS__EUR__OTH	0.755319	+	+?+-++	1.18348	4.77675e-35	0.00037771	226364	171	0				QT
F	GCK	D	0.01	7	44145154	Glucose	AFR__CSA__EAS__EUR__OTH	0.749344	+	+?+-++	1.18348	4.77675e-35	0.00037771	226364	171	0				QT
F	LPL	P+LP+VUS_H+D	0.01	8	19939442	HDL	AFR__AMR__CSA__EAS__EUR__OTH	0.812249	-	------	-0.199198	4.80273e-35	0.00147563	226862	669.53	0				QT
B	OR6N2	P+LP+VUS_H+D	singleton	1	158776685	FAI	AFR__CSA__EUR__OTH	0.642733	+	-?-?+-	19.154	5.03696e-35	7.26685e-05	378431	55	0				QT
B	LIPC	P+LP+VUS_H	0.01	15	58432041	Apolipoprotein_A	AFR__AMR__CSA__EAS__EUR__OTH	0.670867	+	++++++	0.104992	5.78076e-35	0.00165404	419314	1387.12	0				QT
B	ABCA1	P+LP+VUS_H+D	singleton	9	104784318	Apolipoprotein_A	AFR__CSA__EAS__EUR__OTH	0.748459	-	-?-+--	-0.188135	6.14283e-35	0.000514873	418810	431.27	0				QT
B	APOC3	D	0.001	11	116830568	Triglycerides	AFR__AMR__CSA__EAS__EUR__OTH	1.02602	-	-+----	-0.59802	6.84272e-35	0.000443181	460309	406	1				QT
B	APOC3	D	0.01	11	116830568	Triglycerides	AFR__AMR__CSA__EAS__EUR__OTH	1.05552	-	-+----	-0.59802	6.84272e-35	0.000443181	460309	406	1				QT
M	GCK	P+LP+VUS_H+D	0.01	7	44145154	HbA1c	AFR__AMR__CSA__EAS__EUR__OTH	0.937865	+	++++++	6.28051	7.05359e-35	0.000494543	210295	208	0				QT
M	GCK	P+LP+VUS_H+D	0.001	7	44145154	HbA1c	AFR__CSA__EAS__EUR__OTH	0.906261	+	+?++++	6.33274	7.10336e-35	0.000492576	210120	207	0				QT
B	CD36	P+LP+VUS_H	0.001	7	80646087	Apolipoprotein_A	AFR__AMR__CSA__EAS__EUR__OTH	0.675979	+	++++++	0.0679889	8.5046e-35	0.00397241	419314	3317.38	7				QT
B	SLC34A3	D	0.001	9	137230939	eGFR	AFR__AMR__CSA__EAS__EUR__OTH	0.885874	-	--+---	-2.3554	8.73394e-35	0.00459719	460450	4229.55	2				QT
M	SH2D2A	PVS1_VSS	0.01	1	156807181	Oestrodiol	AFR__EUR	0.831645	+	-?+?	89.2706	8.78948e-35	0.000234535	17055	8	0				QT
M	SH2D2A	PVS1_VSSM	0.01	1	156807181	Oestrodiol	AFR__EUR	0.831645	+	-?+?	89.2706	8.78948e-35	0.000234535	17055	8	0				QT
M	SH2D2A	PVS1_VSSMP	0.01	1	156807181	Oestrodiol	AFR__EUR	0.831645	+	-?+?	89.2706	8.78948e-35	0.000234535	17055	8	0				QT
F	G6PD	P+LP	0.01	23	154532012	HbA1c	AFR__AMR__CSA__EAS__EUR__OTH	0.924101	-	------	-1.25126	1.0105e-34	0.00695893	249170	3265.91	101				QT
F	CALHM4	PVS1_VSSM	singleton	6	116553795	Oestrodiol	EUR	0.873512	+	????+?	2556.03	1.01376e-34	4.86381e-05	51400	5	0				QT
F	CALHM4	PVS1_VSSMP	singleton	6	116553795	Oestrodiol	EUR	0.873512	+	????+?	2556.03	1.01376e-34	4.86381e-05	51400	5	0				QT
F	PDE3B	P+LP+VUS_H	0.001	11	14644077	HDL	AFR__CSA__EAS__EUR__OTH	0.821987	+	+?+-++	0.166355	1.1318e-34	0.00210904	226533	955.53	0				QT
F	PDE3B	P+LP+VUS_H	0.01	11	14644077	HDL	AFR__CSA__EAS__EUR__OTH	0.812249	+	+?+-++	0.166355	1.1318e-34	0.00210904	226533	955.53	0				QT
F	LPA	P+LP+VUS_H	0.01	6	160531735	Lipoprotein_A	AFR__AMR__CSA__EAS__EUR__OTH	0.914732	-	-+----	-14.2871	1.19399e-34	0.00465806	200342	1866.41	0				QT
F	LPL	P+LP+VUS_H+D	0.001	8	19939442	HDL	AFR__AMR__CSA__EAS__EUR__OTH	0.821987	-	------	-0.198609	1.22691e-34	0.00146682	226862	665.53	0				QT
B	ABCA1	P+LP	singleton	9	104784318	HDL	AFR__CSA__EAS__EUR__OTH	0.849394	-	-?----	-0.46485	1.23332e-34	0.000118731	421119	100	0				QT
F	CNP	P+LP	singleton	17	41966889	FAI	CSA__EUR__OTH	0.74068	+	??+?+-	8.39249	1.37737e-34	2.99532e-05	183620	11	0				QT
M	CTSB	D	singleton	8	11845128	Oestrodiol	AFR__EUR__OTH	0.624107	+	-?+-	130.023	1.39365e-34	0.000452975	17661	16	0				QT
B	DECR2	PVS1_VSS	singleton	16	401964	FAI	AFR__CSA__EUR__OTH	0.642733	+	+?+?++	20.0331	1.66565e-34	2.53965e-05	378431	19.22	0				QT
B	PKD1	PVS1_VS	0.001	16	2089733	CKD_All	AFR__CSA__EAS__EUR__OTH	1.00587	+	+?--++	7.0874	1.70308e-34	0.000455329	25471	98.01	0	456674	339.06	1	BT
B	PKD1	PVS1_VS	0.01	16	2089733	CKD_All	AFR__CSA__EAS__EUR__OTH	1.03466	+	+?--++	7.0874	1.70308e-34	0.000455329	25471	98.01	0	456674	339.06	1	BT
B	LYN	P+LP+VUS_H	0.001	8	55880105	FAI	AFR__CSA__EUR__OTH	0.817638	+	-?-?+-	14.2729	1.77067e-34	0.000113627	378431	86	0				QT
M	ANGPTL3	PVS1_VSSM	0.01	1	62597568	Triglycerides	AFR__AMR__CSA__EAS__EUR__OTH	1.01197	-	-+----	-0.649597	2.10206e-34	0.00105232	210756	443.56	0				QT
M	ANGPTL3	PVS1_VSSMP	0.01	1	62597568	Triglycerides	AFR__AMR__CSA__EAS__EUR__OTH	1.01197	-	-+----	-0.649597	2.10206e-34	0.00105232	210756	443.56	0				QT
B	GCK	PVS1_VSSMP	0.001	7	44145154	HbA1c	CSA__EUR__OTH	0.94188	+	??+?++	11.7567	2.13778e-34	5.32835e-05	450421	48	0				QT
B	GCK	PVS1_VSSMP	0.01	7	44145154	HbA1c	CSA__EUR__OTH	0.968316	+	??+?++	11.7567	2.13778e-34	5.32835e-05	450421	48	0				QT
F	MSMO1	P+LP+VUS_H+D	singleton	4	165333337	FAI	EUR__OTH	0.74068	+	????++	5.16876	2.14839e-34	7.47177e-05	180680	27	0				QT
F	ANGPTL3	PVS1_VS	0.001	1	62597568	Cholesterol	AFR__AMR__CSA__EAS__EUR__OTH	0.950335	-	------	-0.606712	2.19331e-34	0.000981205	249693	488	1				QT
F	ANGPTL3	PVS1_VS	0.01	1	62597568	Cholesterol	AFR__AMR__CSA__EAS__EUR__OTH	0.946953	-	------	-0.606712	2.19331e-34	0.000981205	249693	488	1				QT
B	LIPC	P+LP+VUS_H	0.001	15	58432041	Apolipoprotein_A	AFR__AMR__CSA__EAS__EUR__OTH	0.675979	+	++++++	0.104597	2.3056e-34	0.00163615	419314	1372.12	0				QT
F	LCAT	P+LP+VUS_H	0.001	16	67939916	Apolipoprotein_A	AFR__CSA__EUR__OTH	0.661516	-	-?-?--	-0.27961	2.40103e-34	0.000512986	223203	229	0				QT
F	LCAT	P+LP+VUS_H	0.01	16	67939916	Apolipoprotein_A	AFR__CSA__EUR__OTH	0.651155	-	-?-?--	-0.27961	2.40103e-34	0.000512986	223203	229	0				QT
B	ABCA1	P+LP	singleton	9	104784318	Apolipoprotein_A	AFR__CSA__EAS__EUR__OTH	0.748459	-	-?----	-0.388863	2.45398e-34	0.000116998	418810	98	0				QT
F	BBS5	D	singleton	2	169479554	Testosterone	AFR__CSA__EAS__EUR__OTH	0.721949	+	+?+++-	1.3474	2.75595e-34	8.1743e-05	207969	34	0				QT
B	ANGPTL3	P+LP+VUS_H	0.001	1	62597568	Apolipoprotein_A	AFR__AMR__CSA__EAS__EUR__OTH	0.675979	-	-+-+--	-0.130484	2.87097e-34	0.00104591	419314	877.13	0				QT
B	ANGPTL3	P+LP+VUS_H	0.01	1	62597568	Apolipoprotein_A	AFR__AMR__CSA__EAS__EUR__OTH	0.670867	-	-+-+--	-0.130484	2.87097e-34	0.00104591	419314	877.13	0				QT
B	LYN	P+LP+VUS_H	0.01	8	55880105	FAI	AFR__AMR__CSA__EUR__OTH	0.864406	+	-+-?+-	14.0943	2.87795e-34	0.000114816	378866	87	0				QT
B	PLA2G12A	D	0.01	4	109714392	SHBG	AFR__AMR__CSA__EAS__EUR__OTH	0.934308	+	--+-++	3.62572	2.91579e-34	0.00904218	417780	7507.28	24				QT
B	ANGPTL3	PVS1_VSS	0.001	1	62597568	Apolipoprotein_A	AFR__AMR__CSA__EAS__EUR__OTH	0.675979	-	-+-+--	-0.131072	2.97969e-34	0.00103637	419314	869.13	0				QT
B	ANGPTL3	PVS1_VSS	0.01	1	62597568	Apolipoprotein_A	AFR__AMR__CSA__EAS__EUR__OTH	0.670867	-	-+-+--	-0.131072	2.97969e-34	0.00103637	419314	869.13	0				QT
B	PCSK9	PVS1_VS	0.001	1	55039838	Cholesterol	AFR__CSA__EAS__EUR__OTH	0.97357	-	-?----	-0.926965	3.19742e-34	0.000242544	460129	223.2	0				QT
B	APOB	P+LP	0.001	2	21001742	Triglycerides	AFR__AMR__CSA__EAS__EUR__OTH	1.02602	-	-+----	-0.277772	3.47676e-34	0.0020357	460309	1872.1	1				QT
B	APOB	P+LP	0.01	2	21001742	Triglycerides	AFR__AMR__CSA__EAS__EUR__OTH	1.05552	-	-+----	-0.277772	3.47676e-34	0.0020357	460309	1872.1	1				QT
F	LPL	P+LP+VUS_H	0.001	8	19939442	HDL	AFR__CSA__EAS__EUR__OTH	0.821987	-	-?----	-0.206456	3.62898e-34	0.00134535	226533	609.53	0				QT
F	LPL	P+LP+VUS_H	0.01	8	19939442	HDL	AFR__CSA__EAS__EUR__OTH	0.812249	-	-?----	-0.206456	3.62898e-34	0.00134535	226533	609.53	0				QT
M	LDLR	P+LP+VUS_H+D	0.001	19	11089550	Cholesterol	AFR__AMR__CSA__EAS__EUR__OTH	0.949009	+	--++++	0.469204	4.1338e-34	0.00201376	210984	849.74	0				QT
M	LDLR	P+LP+VUS_H+D	0.01	19	11089550	Cholesterol	AFR__AMR__CSA__EAS__EUR__OTH	0.993414	+	--++++	0.469204	4.1338e-34	0.00201376	210984	849.74	0				QT
B	ABCA1	PVS1_VSSMP	singleton	9	104784318	HDL	AFR__CSA__EAS__EUR__OTH	0.849394	-	-?----	-0.463665	4.32078e-34	0.000117544	421119	99	0				QT
M	PTPRG	PVS1_VSSM	0.001	3	61562288	Oestrodiol	EUR__OTH	0.728588	+	??+-	237.837	4.33036e-34	0.000465387	17190	16	0				QT
M	PTPRG	PVS1_VSSMP	0.001	3	61562288	Oestrodiol	EUR__OTH	0.728588	+	??+-	237.837	4.33036e-34	0.000465387	17190	16	0				QT
B	LIPC	P+LP	0.01	15	58432041	HDL	AFR__CSA__EAS__EUR__OTH	0.86135	+	+?++++	0.184005	4.5334e-34	0.000756318	421119	637	0				QT
F	GCK	P+LP+VUS_H	0.001	7	44145154	DM_All	AFR__CSA__EAS__EUR__OTH	1.0073	+	-?-+++	9.23789	4.79407e-34	0.000378699	18378	64	0	243043	134	0	BT
F	GCK	P+LP+VUS_H	0.01	7	44145154	DM_All	AFR__CSA__EAS__EUR__OTH	1.03678	+	-?-+++	9.23789	4.79407e-34	0.000378699	18378	64	0	243043	134	0	BT
M	CZIB	P+LP+VUS_H+D	0.001	1	53214662	Oestrodiol	EUR__OTH	0.728588	+	??+-	224.151	4.88459e-34	0.00052356	17190	18	0				QT
B	APOB	P+LP+VUS_H+D	singleton	2	21001742	Apolipoprotein_B	AFR__AMR__CSA__EAS__EUR__OTH	0.949966	-	------	-0.128308	4.90209e-34	0.000559797	458351	513.17	0				QT
M	DKK3	PVS1_VSS	singleton	11	11964474	FAI	CSA__EUR	0.655588	+	??-?+?	40.8981	5.50428e-34	5.20611e-05	182478	19	0				QT
B	PKD2	PVS1_VSSMP	0.001	4	88007669	eGFR	AFR__CSA__EUR__OTH	0.885874	-	+?-?--	-17.9295	5.64641e-34	7.755e-05	457769	71	0				QT
B	PKD2	PVS1_VSSMP	0.01	4	88007669	eGFR	AFR__CSA__EUR__OTH	0.940088	-	+?-?--	-17.9295	5.64641e-34	7.755e-05	457769	71	0				QT
B	PKD2	PVS1_VS	0.001	4	88007669	eGFR	AFR__CSA__EUR__OTH	0.885874	-	+?-?--	-19.522	6.22064e-34	6.55352e-05	457769	60	0				QT
B	PKD2	PVS1_VS	0.01	4	88007669	eGFR	AFR__CSA__EUR__OTH	0.940088	-	+?-?--	-19.522	6.22064e-34	6.55352e-05	457769	60	0				QT
B	PKD2	PVS1_VSS	0.001	4	88007669	eGFR	AFR__CSA__EUR__OTH	0.885874	-	+?-?--	-19.522	6.22064e-34	6.55352e-05	457769	60	0				QT
B	PKD2	PVS1_VSS	0.01	4	88007669	eGFR	AFR__CSA__EUR__OTH	0.940088	-	+?-?--	-19.522	6.22064e-34	6.55352e-05	457769	60	0				QT
B	PCDH15	P+LP	0.001	10	53806579	Oestrodiol	AFR__CSA__OTH	0.889107	+	++?+	1566.11	6.24848e-34	0.000537882	6507	7	0				QT
M	SLC34A3	P+LP+VUS_H+D	0.001	9	137230939	eGFR	AFR__CSA__EAS__EUR__OTH	0.903041	-	-?----	-3.08575	6.71516e-34	0.00565532	210684	2380.97	1				QT
B	ESD	PVS1_S	0.001	13	46771426	Oestrodiol	CSA__OTH	0.889107	+	?+?+	2106.47	6.79296e-34	0.000548968	4554	5	0				QT
B	ESD	PVS1_S	0.01	13	46771426	Oestrodiol	CSA__OTH	0.927274	+	?+?+	2106.47	6.79296e-34	0.000548968	4554	5	0				QT
F	ATP10D	PVS1_M	0.001	4	47512549	Oestrodiol	AFR__EUR	0.954815	+	+???+?	1906.88	7.03371e-34	7.56401e-05	52882	8	0				QT
F	ATP10D	PVS1_M	0.01	4	47512549	Oestrodiol	AFR__EUR	0.959618	+	+???+?	1906.88	7.03371e-34	7.56401e-05	52882	8	0				QT
M	ANGPTL3	PVS1_VSSM	0.001	1	62597568	Triglycerides	AFR__AMR__CSA__EUR__OTH	1.00585	-	-+-?--	-0.645584	7.17458e-34	0.00105094	210081	441.56	0				QT
M	ANGPTL3	PVS1_VSSMP	0.001	1	62597568	Triglycerides	AFR__AMR__CSA__EUR__OTH	1.00585	-	-+-?--	-0.645584	7.17458e-34	0.00105094	210081	441.56	0				QT
F	PKD1	P+LP+VUS_H+D	0.001	16	2089733	End_stage_renal_disease_CDK_stage_5	AFR__CSA__EUR__OTH	0.973836	+	++++	10.3181	7.37764e-34	0.0103195	614	74.46	0	259269	5277.24	6	BT
B	ANGPTL3	PVS1_VSSM	0.001	1	62597568	Apolipoprotein_A	AFR__AMR__CSA__EAS__EUR__OTH	0.675979	-	-+-+--	-0.128608	8.16918e-34	0.00106261	419314	891.13	0				QT
B	ANGPTL3	PVS1_VSSM	0.01	1	62597568	Apolipoprotein_A	AFR__AMR__CSA__EAS__EUR__OTH	0.670867	-	-+-+--	-0.128608	8.16918e-34	0.00106261	419314	891.13	0				QT
B	ANGPTL3	PVS1_VSSMP	0.001	1	62597568	Apolipoprotein_A	AFR__AMR__CSA__EAS__EUR__OTH	0.675979	-	-+-+--	-0.128608	8.16918e-34	0.00106261	419314	891.13	0				QT
B	ANGPTL3	PVS1_VSSMP	0.01	1	62597568	Apolipoprotein_A	AFR__AMR__CSA__EAS__EUR__OTH	0.670867	-	-+-+--	-0.128608	8.16918e-34	0.00106261	419314	891.13	0				QT
B	LDLR	PVS1_VSSM	0.001	19	11089550	Pure_hypercholesterolemia	AFR__CSA__EAS__EUR__OTH	0.973429	+	-?++++	9.09908	8.5919e-34	0.000155556	76238	82	0	405907	68	0	BT
B	LDLR	PVS1_VSSM	0.01	19	11089550	Pure_hypercholesterolemia	AFR__CSA__EAS__EUR__OTH	1.03117	+	-?++++	9.09908	8.5919e-34	0.000155556	76238	82	0	405907	68	0	BT
B	LDLR	PVS1_VSSMP	0.001	19	11089550	Pure_hypercholesterolemia	AFR__CSA__EAS__EUR__OTH	0.973429	+	-?++++	9.09908	8.5919e-34	0.000155556	76238	82	0	405907	68	0	BT
B	LDLR	PVS1_VSSMP	0.01	19	11089550	Pure_hypercholesterolemia	AFR__CSA__EAS__EUR__OTH	1.03117	+	-?++++	9.09908	8.5919e-34	0.000155556	76238	82	0	405907	68	0	BT
B	LIPC	P+LP	0.001	15	58432041	HDL	AFR__CSA__EAS__EUR__OTH	0.810108	+	+?++++	0.185252	8.86988e-34	0.000738509	421119	622	0				QT
B	MC4R	P	0.001	18	60371355	BMI	AFR__CSA__EUR__OTH__TUR	1.03327	+	+?+?+++	2.96637	9.09921e-34	0.00036746	478964	352	0				QT
B	MC4R	P	0.01	18	60371355	BMI	AFR__CSA__EUR__OTH__TUR	1.08412	+	+?+?+++	2.96637	9.09921e-34	0.00036746	478964	352	0				QT
B	ABCA1	PVS1_VSSMP	singleton	9	104784318	Apolipoprotein_A	AFR__CSA__EAS__EUR__OTH	0.748459	-	-?----	-0.387281	1.02419e-33	0.000115804	418810	97	0				QT
F	UGT2A1	PVS1_VSSM	singleton	4	69589381	FAI	AFR__CSA__EAS__EUR__OTH	0.74068	+	-?-+++	2.75162	1.1997e-33	8.77001e-05	188115	33	0				QT
F	UGT2A1	PVS1_VSSMP	singleton	4	69589381	FAI	AFR__CSA__EAS__EUR__OTH	0.74068	+	-?-+++	2.75162	1.1997e-33	8.77001e-05	188115	33	0				QT
M	APOA5	P	0.001	11	116790137	Triglycerides	EUR	1.00585	+	????+?	1.31682	1.23666e-33	0.000279022	195325	109	0				QT
M	APOA5	P	0.01	11	116790137	Triglycerides	EUR	1.01197	+	????+?	1.31682	1.23666e-33	0.000279022	195325	109	0				QT
B	ANGPTL4	P+LP+VUS_H+D	0.001	19	8364323	Triglycerides	AFR__AMR__CSA__EAS__EUR__OTH	1.02602	-	------	-0.288701	1.36099e-33	0.00184659	460309	1700	0				QT
B	ANGPTL4	P+LP+VUS_H+D	0.01	19	8364323	Triglycerides	AFR__AMR__CSA__EAS__EUR__OTH	1.05552	-	------	-0.288701	1.36099e-33	0.00184659	460309	1700	0				QT
B	PDE3B	P+LP	0.001	11	14644077	HDL	AFR__CSA__EAS__EUR__OTH	0.810108	+	+?+-++	0.139237	1.55111e-33	0.00130041	421119	1095.26	0				QT
B	PDE3B	P+LP	0.01	11	14644077	HDL	AFR__CSA__EAS__EUR__OTH	0.86135	+	+?+-++	0.139237	1.55111e-33	0.00130041	421119	1095.26	0				QT
F	APOB	P+LP+VUS_H	0.001	2	21001742	Cholesterol	AFR__AMR__CSA__EAS__EUR__OTH	0.950335	-	-+-+--	-0.400997	1.55588e-33	0.0022031	249693	1100.2	0				QT
F	APOB	P+LP+VUS_H	0.01	2	21001742	Cholesterol	AFR__AMR__CSA__EAS__EUR__OTH	0.946953	-	-+-+--	-0.400997	1.55588e-33	0.0022031	249693	1100.2	0				QT
B	APOB	P+LP+VUS_H	0.001	2	21001742	Triglycerides	AFR__AMR__CSA__EAS__EUR__OTH	1.02602	-	------	-0.271212	1.6186e-33	0.00210009	460309	1931.38	1				QT
B	APOB	P+LP+VUS_H	0.01	2	21001742	Triglycerides	AFR__AMR__CSA__EAS__EUR__OTH	1.05552	-	------	-0.271212	1.6186e-33	0.00210009	460309	1931.38	1				QT
B	MC4R	P+LP+VUS_H+D	0.001	18	60371355	BMI	AFR__AMR__CSA__EAS__EUR__OTH__TUR	1.03327	+	+++++++	1.16294	1.64067e-33	0.0023236	481763	2236.85	1				QT
B	MC4R	P+LP+VUS_H+D	0.01	18	60371355	BMI	AFR__AMR__CSA__EAS__EUR__OTH__TUR	1.08412	+	+++++++	1.16294	1.64067e-33	0.0023236	481763	2236.85	1				QT
B	ABCA1	PVS1_VSSM	singleton	9	104784318	HDL	AFR__CSA__EAS__EUR__OTH	0.849394	-	-?----	-0.466497	1.65651e-33	0.000113982	421119	96	0				QT
B	PKD1	PVS1_VSS	0.001	16	2089733	CKD_All	AFR__CSA__EAS__EUR__OTH	1.00587	+	+?+-+-	6.01446	1.66072e-33	0.000549699	25471	105.01	0	456674	421.06	2	BT
B	PKD1	PVS1_VSS	0.01	16	2089733	CKD_All	AFR__CSA__EAS__EUR__OTH	1.03466	+	+?+-+-	6.01446	1.66072e-33	0.000549699	25471	105.01	0	456674	421.06	2	BT
M	ANGPTL3	P+LP+VUS_H	0.01	1	62597568	Triglycerides	AFR__AMR__CSA__EAS__EUR__OTH	1.01197	-	-+----	-0.646455	1.66207e-33	0.00103096	210756	434.56	0				QT
M	HBB	P+LP	0.01	11	5225487	HbA1c	AFR__AMR__CSA__EAS__EUR__OTH	0.937865	-	--++--	-3.95716	1.78504e-33	0.00112996	210295	473.25	1				QT
F	ZNF229	PVS1_VSS	0.01	19	44428306	Apolipoprotein_B	AFR__AMR__CSA__EAS__EUR__OTH	0.97542	-	-++--+	-0.0516826	2.04897e-33	0.00604117	248828	2990.42	8				QT
M	GRAMD1C	P+LP	singleton	3	113838910	Oestrodiol	AFR__EUR__OTH	0.624107	+	+?++	102.923	2.17186e-33	0.000339732	17661	12	0				QT
M	GRAMD1C	PVS1_VS	singleton	3	113838910	Oestrodiol	AFR__EUR__OTH	0.624107	+	+?++	102.923	2.17186e-33	0.000339732	17661	12	0				QT
M	GRAMD1C	PVS1_VSS	singleton	3	113838910	Oestrodiol	AFR__EUR__OTH	0.624107	+	+?++	102.923	2.17186e-33	0.000339732	17661	12	0				QT
M	KCNJ14	D	singleton	19	48461725	Oestrodiol	EUR__OTH	0.624107	+	??++	244.425	2.20482e-33	0.0004363	17190	15	0				QT
F	APOB	P+LP	0.001	2	21001742	Cholesterol	AFR__AMR__CSA__EAS__EUR__OTH	0.950335	-	-+-+--	-0.406326	2.23195e-33	0.00213903	249693	1068.2	0				QT
F	APOB	P+LP	0.01	2	21001742	Cholesterol	AFR__AMR__CSA__EAS__EUR__OTH	0.946953	-	-+-+--	-0.406326	2.23195e-33	0.00213903	249693	1068.2	0				QT
M	PCSK9	D	0.001	1	55039838	Cholesterol	AFR__CSA__EAS__EUR__OTH	0.949009	-	-?----	-0.457443	2.8421e-33	0.00209101	210800	879.57	1				QT
B	PIEZO1	D	0.01	16	88715609	HbA1c	AFR__AMR__CSA__EAS__EUR__OTH	0.968316	-	++----	-0.447488	2.94348e-33	0.0349729	459465	31945.7	96				QT
B	ABCA1	PVS1_VSSM	singleton	9	104784318	Apolipoprotein_A	AFR__CSA__EAS__EUR__OTH	0.748459	-	-?----	-0.390223	3.30742e-33	0.000112223	418810	94	0				QT
M	GK	PVS1_VS	0.001	23	30653539	Triglycerides	EUR	1.00585	+	????+?	2.9204	3.34314e-33	3.19404e-05	195325	0	6.24				QT
M	GK	PVS1_VS	0.01	23	30653539	Triglycerides	EUR	1.01197	+	????+?	2.9204	3.34314e-33	3.19404e-05	195325	0	6.24				QT
B	PDE3B	PVS1_VS	0.001	11	14644077	HDL	AFR__CSA__EAS__EUR__OTH	0.810108	+	+?+-++	0.13821	3.54873e-33	0.00130516	421119	1099.26	0				QT
B	PDE3B	PVS1_VS	0.01	11	14644077	HDL	AFR__CSA__EAS__EUR__OTH	0.86135	+	+?+-++	0.13821	3.54873e-33	0.00130516	421119	1099.26	0				QT
B	PIGL	PVS1_S	0.001	17	16217227	FAI	AFR__EUR__OTH	0.817638	+	-???++	14.6909	3.89605e-33	0.000101028	371184	75	0				QT
B	PIGL	PVS1_S	0.01	17	16217227	FAI	AFR__EUR__OTH	0.864406	+	-???++	14.6909	3.89605e-33	0.000101028	371184	75	0				QT
F	ZNF229	PVS1_S	0.01	19	44428306	Apolipoprotein_B	AFR__AMR__CSA__EAS__EUR__OTH	0.97542	-	-++--+	-0.0515143	3.90111e-33	0.0060271	248828	2983.42	8				QT
B	ANGPTL3	PVS1_VS	0.001	1	62597568	Apolipoprotein_A	AFR__AMR__CSA__EAS__EUR__OTH	0.675979	-	-+-+--	-0.133563	3.90313e-33	0.000963478	419314	808	0				QT
B	ANGPTL3	PVS1_VS	0.01	1	62597568	Apolipoprotein_A	AFR__AMR__CSA__EAS__EUR__OTH	0.670867	-	-+-+--	-0.133563	3.90313e-33	0.000963478	419314	808	0				QT
M	ANGPTL3	PVS1_VSS	0.01	1	62597568	Triglycerides	AFR__AMR__CSA__EAS__EUR__OTH	1.01197	-	-+----	-0.646034	4.1185e-33	0.00102147	210756	430.56	0				QT
M	MRTFB	PVS1_M	0.001	16	14079288	FAI	AFR__EUR	0.79363	+	+???+?	49.179	4.25264e-33	3.31391e-05	181055	12	0				QT
M	MRTFB	PVS1_M	0.01	16	14079288	FAI	AFR__EUR	0.845248	+	+???+?	49.179	4.25264e-33	3.31391e-05	181055	12	0				QT
M	FRYL	P+LP+VUS_H	singleton	4	48499431	Oestrodiol	EUR	0.624107	+	??+?	250.37	4.90797e-33	0.000482393	16584	16	0				QT
B	LPL	D	0.001	8	19939442	Apolipoprotein_A	AFR__AMR__CSA__EAS__EUR__OTH	0.675979	-	-+----	-0.11489	5.13084e-33	0.00129139	419314	1083	0				QT
B	LPL	D	0.01	8	19939442	Apolipoprotein_A	AFR__AMR__CSA__EAS__EUR__OTH	0.670867	-	-+----	-0.11489	5.13084e-33	0.00129139	419314	1083	0				QT
M	ANGPTL3	P+LP+VUS_H	0.001	1	62597568	Triglycerides	AFR__AMR__CSA__EUR__OTH	1.00585	-	-+-?--	-0.642349	5.67175e-33	0.00102952	210081	432.56	0				QT
F	ZNF229	PVS1_VSSM	0.01	19	44428306	Apolipoprotein_B	AFR__AMR__CSA__EAS__EUR__OTH	0.97542	-	-++--+	-0.0510535	6.88567e-33	0.00608739	248828	3013.42	8				QT
M	CFAP74	PVS1_VS	singleton	1	1922296	FAI	AFR__CSA__EAS__EUR__OTH	0.655588	+	+?+++-	23.3879	7.215e-33	0.000148354	192108	57	0				QT
B	LPA	P+LP+VUS_H	0.001	6	160531735	Lipoprotein_A	AFR__AMR__CSA__EAS__EUR__OTH	0.958912	-	-+----	-13.555	7.31883e-33	0.00251667	368510	1846.83	4				QT
M	SLC22A2	P+LP+VUS_H	0.01	6	160217441	eGFR	AFR__CSA__EAS__EUR__OTH	0.908182	-	-?----	-5.1398	7.54256e-33	0.00193786	210684	808.55	4				QT
B	ALDH2	P+LP	0.001	12	111766952	FAI	AFR__EAS__EUR__OTH	0.817638	+	-??++-	13.9686	7.64709e-33	0.000111551	372976	83.21	0				QT
B	ALDH2	P+LP	0.01	12	111766952	FAI	AFR__EAS__EUR__OTH	0.864406	+	-??++-	13.9686	7.64709e-33	0.000111551	372976	83.21	0				QT
B	ALDH2	PVS1_VS	0.001	12	111766952	FAI	AFR__EAS__EUR__OTH	0.817638	+	-??++-	13.9686	7.64709e-33	0.000111551	372976	83.21	0				QT
B	ALDH2	PVS1_VS	0.01	12	111766952	FAI	AFR__EAS__EUR__OTH	0.864406	+	-??++-	13.9686	7.64709e-33	0.000111551	372976	83.21	0				QT
M	DKK3	PVS1_VSSM	singleton	11	11964474	FAI	CSA__EUR	0.655588	+	??-?+?	39.0773	8.77709e-33	5.48011e-05	182478	20	0				QT
M	DKK3	PVS1_VSSMP	singleton	11	11964474	FAI	CSA__EUR	0.655588	+	??-?+?	39.0773	8.77709e-33	5.48011e-05	182478	20	0				QT
M	PTPRG	P+LP	0.01	3	61562288	Oestrodiol	AFR__EUR	0.831645	+	-?+?	56.0833	9.08099e-33	0.000498388	17055	17	0				QT
M	PTPRG	PVS1_VS	0.01	3	61562288	Oestrodiol	AFR__EUR	0.831645	+	-?+?	56.0833	9.08099e-33	0.000498388	17055	17	0				QT
F	GCK	P+LP	0.001	7	44145154	Glucose	CSA__EAS__EUR__OTH	0.755319	+	??++++	1.44781	9.12796e-33	0.000240524	222431	107	0				QT
F	GCK	P+LP	0.01	7	44145154	Glucose	CSA__EAS__EUR__OTH	0.749344	+	??++++	1.44781	9.12796e-33	0.000240524	222431	107	0				QT
M	HBB	P+LP+VUS_H	0.01	11	5225487	HbA1c	AFR__AMR__CSA__EAS__EUR__OTH	0.937865	-	--++--	-3.81936	1.03204e-32	0.00115136	210295	482.25	1				QT
M	LCAT	P+LP	0.001	16	67939916	HDL	AFR__EAS__EUR__OTH	0.840479	-	-??---	-0.348782	1.17669e-32	0.000356388	190238	135.6	0				QT
M	LCAT	P+LP	0.01	16	67939916	HDL	AFR__EAS__EUR__OTH	0.863301	-	-??---	-0.348782	1.17669e-32	0.000356388	190238	135.6	0				QT
M	LDLR	P+LP+VUS_H	0.001	19	11089550	Cholesterol	AFR__AMR__CSA__EAS__EUR__OTH	0.949009	+	--++++	0.473087	1.18808e-32	0.0018929	210984	798.74	0				QT
M	LDLR	P+LP+VUS_H	0.01	19	11089550	Cholesterol	AFR__AMR__CSA__EAS__EUR__OTH	0.993414	+	--++++	0.473087	1.18808e-32	0.0018929	210984	798.74	0				QT
B	PKD1	P+LP+VUS_H+D	singleton	16	2089733	Chronic_kidney_disease	AFR__AMR__CSA__EAS__EUR__OTH	1.09196	+	+---+-	4.62867	1.298e-32	0.000684673	25203	102	0	457512	559	0	BT
M	OR4C15	PVS1_S	0.001	11	55554470	FAI	CSA__EUR__OTH	0.79363	+	??+?++	26.3583	1.30608e-32	0.000121941	188616	46	0				QT
M	OR4C15	PVS1_VSS	0.001	11	55554470	FAI	CSA__EUR__OTH	0.79363	+	??+?++	26.3583	1.30608e-32	0.000121941	188616	46	0				QT
M	ANGPTL3	PVS1_VSS	0.001	1	62597568	Triglycerides	AFR__AMR__CSA__EUR__OTH	1.00585	-	-+-?--	-0.641882	1.40345e-32	0.00102	210081	428.56	0				QT
B	ABCA1	PVS1_VSS	singleton	9	104784318	HDL	AFR__CSA__EAS__EUR__OTH	0.849394	-	-?----	-0.464168	1.50638e-32	0.000111607	421119	94	0				QT
M	RXRG	P+LP+VUS_H+D	singleton	1	165401278	Oestrodiol	CSA__EUR	0.624107	+	?-+?	65.7843	1.59877e-32	0.000352113	17040	12	0				QT
M	HBB	P+LP+VUS_H+D	0.01	11	5225487	HbA1c	AFR__AMR__CSA__EAS__EUR__OTH	0.937865	-	--++--	-3.68455	1.78771e-32	0.00119415	210295	500.25	1				QT
B	ANGPTL3	PVS1_VSSM	0.001	1	62597568	LDL	AFR__AMR__CSA__EAS__EUR__OTH	0.994287	-	------	-0.328152	1.84469e-32	0.00105374	459814	967.05	1				QT
B	ANGPTL3	PVS1_VSSM	0.01	1	62597568	LDL	AFR__AMR__CSA__EAS__EUR__OTH	1.02789	-	------	-0.328152	1.84469e-32	0.00105374	459814	967.05	1				QT
B	ANGPTL3	PVS1_VSSMP	0.001	1	62597568	LDL	AFR__AMR__CSA__EAS__EUR__OTH	0.994287	-	------	-0.328152	1.84469e-32	0.00105374	459814	967.05	1				QT
B	ANGPTL3	PVS1_VSSMP	0.01	1	62597568	LDL	AFR__AMR__CSA__EAS__EUR__OTH	1.02789	-	------	-0.328152	1.84469e-32	0.00105374	459814	967.05	1				QT
M	APOC3	PVS1_VSSMP	0.001	11	116830568	HDL	AFR__CSA__EUR__OTH	0.840479	+	+?+?++	0.338544	1.91283e-32	0.000355725	193970	138	0				QT
B	PLA2G12A	P+LP+VUS_H+D	0.01	4	109714392	HDL	AFR__AMR__CSA__EAS__EUR__OTH	0.86135	-	+-----	-0.051396	1.97748e-32	0.00919685	421626	7707.27	24				QT
F	CCNB3	D	singleton	23	50285169	Testosterone	EUR	0.721949	+	????+?	3.26011	2.2075e-32	1.55326e-05	193142	6	0				QT
B	PDE3B	PVS1_VSS	0.001	11	14644077	HDL	AFR__CSA__EAS__EUR__OTH	0.810108	+	+?+-++	0.13444	2.52197e-32	0.00134197	421119	1130.26	0				QT
B	PDE3B	PVS1_VSS	0.01	11	14644077	HDL	AFR__CSA__EAS__EUR__OTH	0.86135	+	+?+-++	0.13444	2.52197e-32	0.00134197	421119	1130.26	0				QT
F	ANGPTL3	PVS1_VSSM	0.001	1	62597568	Triglycerides	AFR__AMR__CSA__EAS__EUR__OTH	0.97581	-	------	-0.413498	2.54453e-32	0.0010639	249553	529	1				QT
F	ANGPTL3	PVS1_VSSM	0.01	1	62597568	Triglycerides	AFR__AMR__CSA__EAS__EUR__OTH	1.04889	-	------	-0.413498	2.54453e-32	0.0010639	249553	529	1				QT
F	ANGPTL3	PVS1_VSSMP	0.001	1	62597568	Triglycerides	AFR__AMR__CSA__EAS__EUR__OTH	0.97581	-	------	-0.413498	2.54453e-32	0.0010639	249553	529	1				QT
F	ANGPTL3	PVS1_VSSMP	0.01	1	62597568	Triglycerides	AFR__AMR__CSA__EAS__EUR__OTH	1.04889	-	------	-0.413498	2.54453e-32	0.0010639	249553	529	1				QT
B	LHFPL6	PVS1_VSS	0.001	13	39343939	HbA1c	EUR__OTH	0.94188	+	????+-	23.563	3.04085e-32	1.24503e-05	441758	11	0				QT
B	LHFPL6	PVS1_VSS	0.01	13	39343939	HbA1c	EUR__OTH	0.968316	+	????+-	23.563	3.04085e-32	1.24503e-05	441758	11	0				QT
B	VPS33A	P+LP+VUS_H+D	singleton	12	122232252	FAI	AFR__CSA__EAS__EUR__OTH	0.642733	+	-?-++-	13.9311	3.24588e-32	0.000113092	380223	86	0				QT
B	PKD1	P+LP+VUS_H	0.001	16	2089733	Hypertension	AFR__CSA__EAS__EUR__OTH	0.927696	+	-+-++	13.9164	3.28953e-32	0.00128392	3332	62	0	478813	1172.07	2	BT
B	PKD1	P+LP+VUS_H	0.01	16	2089733	Hypertension	AFR__CSA__EAS__EUR__OTH	0.9752	+	-+-++	13.9164	3.28953e-32	0.00128392	3332	62	0	478813	1172.07	2	BT
B	UBL4B	D	0.001	1	110112535	HbA1c	EUR__OTH	0.94188	+	????+-	12.4697	3.62172e-32	4.64055e-05	441758	41	0				QT
B	UBL4B	D	0.01	1	110112535	HbA1c	EUR__OTH	0.968316	+	????+-	12.4697	3.62172e-32	4.64055e-05	441758	41	0				QT
B	CLEC12A	PVS1_S	0.001	12	9971597	Oestrodiol	CSA__OTH	0.889107	+	?+?+	2119.71	3.86116e-32	0.000658762	4554	6	0				QT
B	CLEC12A	PVS1_S	0.01	12	9971597	Oestrodiol	CSA__OTH	0.927274	+	?+?+	2119.71	3.86116e-32	0.000658762	4554	6	0				QT
B	PCDH15	P+LP	singleton	10	53806579	Oestrodiol	AFR__CSA__OTH	0.842868	+	-+?+	1817.69	3.98966e-32	0.000384202	6507	5	0				QT
B	ANGPTL3	P+LP+VUS_H	0.001	1	62597568	LDL	AFR__AMR__CSA__EAS__EUR__OTH	0.994287	-	------	-0.328714	4.01236e-32	0.00103743	459814	952.05	1				QT
B	ANGPTL3	P+LP+VUS_H	0.01	1	62597568	LDL	AFR__AMR__CSA__EAS__EUR__OTH	1.02789	-	------	-0.328714	4.01236e-32	0.00103743	459814	952.05	1				QT
M	PLA2G12A	P+LP+VUS_H+D	0.01	4	109714392	Triglycerides	AFR__CSA__EAS__EUR__OTH	1.01197	+	+?++++	0.217024	4.15008e-32	0.00912784	210572	3828.13	8				QT
B	NR1H3	D	0.001	11	47259173	HDL	AFR__CSA__EAS__EUR__OTH	0.810108	+	-?+++-	0.148567	4.1619e-32	0.00108773	421119	914.13	1				QT
B	NR1H3	D	0.01	11	47259173	HDL	AFR__CSA__EAS__EUR__OTH	0.86135	+	-?+++-	0.148567	4.1619e-32	0.00108773	421119	914.13	1				QT
B	ABCA1	PVS1_VSS	singleton	9	104784318	Apolipoprotein_A	AFR__CSA__EAS__EUR__OTH	0.748459	-	-?----	-0.387067	4.72245e-32	0.000109835	418810	92	0				QT
B	PLA2G12A	D	0.01	4	109714392	HDL	AFR__AMR__CSA__EAS__EUR__OTH	0.86135	-	+-----	-0.0514864	4.78401e-32	0.00905336	421626	7586.27	24				QT
B	CD36	PVS1_VSSMP	0.001	7	80646087	Apolipoprotein_A	AFR__AMR__CSA__EAS__EUR__OTH	0.675979	+	++++++	0.0701944	5.22819e-32	0.00338329	419314	2817.32	10				QT
F	MC4R	P+LP+VUS_H	0.01	18	60371355	BMI	AFR__AMR__CSA__EAS__EUR__OTH__TUR	1.06042	+	+-+++++	2.16097	5.7445e-32	0.00139185	261629	726.29	1				QT
B	ENC1	D	singleton	5	74634684	FAI	AFR__CSA__EAS__EUR__OTH	0.642733	+	-?+++-	13.861	5.75388e-32	0.000109146	380223	83	0				QT
M	PLA2G12A	D	0.01	4	109714392	Triglycerides	AFR__CSA__EAS__EUR__OTH	1.01197	+	+?++++	0.218132	5.88695e-32	0.00899012	210572	3770.13	8				QT
B	CD36	PVS1_VSSM	0.001	7	80646087	Apolipoprotein_A	AFR__AMR__CSA__EAS__EUR__OTH	0.675979	+	++++++	0.0703153	5.896e-32	0.0033666	419314	2803.32	10				QT
F	HSD17B6	PVS1_VSS	singleton	12	56773854	HbA1c	AFR__EUR	0.751005	+	+???+?	20.5898	5.91041e-32	2.65219e-05	235328	12.48	0				QT
F	HSD17B6	PVS1_VSSM	singleton	12	56773854	HbA1c	AFR__EUR	0.751005	+	+???+?	20.5898	5.91041e-32	2.65219e-05	235328	12.48	0				QT
B	CD36	PVS1_VSS	0.001	7	80646087	Apolipoprotein_A	AFR__AMR__CSA__EAS__EUR__OTH	0.675979	+	++++++	0.0704392	6.18791e-32	0.00335407	419314	2792.81	10				QT
F	ANGPTL3	P+LP+VUS_H	0.001	1	62597568	Triglycerides	AFR__AMR__CSA__EAS__EUR__OTH	0.97581	-	------	-0.413084	6.19986e-32	0.00105188	249553	523	1				QT
F	ANGPTL3	P+LP+VUS_H	0.01	1	62597568	Triglycerides	AFR__AMR__CSA__EAS__EUR__OTH	1.04889	-	------	-0.413084	6.19986e-32	0.00105188	249553	523	1				QT
F	PLPBP	P+LP	singleton	8	37762660	Oestrodiol	AFR__EUR__OTH	0.873512	+	+???+-	1944.33	6.33318e-32	6.33587e-05	55241	7	0				QT
B	LDLR	PVS1_VSSM	0.001	19	11089550	LDL	AFR__CSA__EAS__EUR__OTH	0.994287	+	+?++++	0.866571	6.33897e-32	0.000152469	459266	140.05	0				QT
B	LDLR	PVS1_VSSM	0.01	19	11089550	LDL	AFR__CSA__EAS__EUR__OTH	1.02789	+	+?++++	0.866571	6.33897e-32	0.000152469	459266	140.05	0				QT
B	LDLR	PVS1_VSSMP	0.001	19	11089550	LDL	AFR__CSA__EAS__EUR__OTH	0.994287	+	+?++++	0.866571	6.33897e-32	0.000152469	459266	140.05	0				QT
B	LDLR	PVS1_VSSMP	0.01	19	11089550	LDL	AFR__CSA__EAS__EUR__OTH	1.02789	+	+?++++	0.866571	6.33897e-32	0.000152469	459266	140.05	0				QT
B	PKD2	P+LP+VUS_H	0.001	4	88007669	eGFR	AFR__CSA__EUR__OTH	0.885874	-	+?-?--	-14.7071	6.4435e-32	0.000109225	457769	100	0				QT
B	PKD2	P+LP+VUS_H	0.01	4	88007669	eGFR	AFR__CSA__EUR__OTH	0.940088	-	+?-?--	-14.7071	6.4435e-32	0.000109225	457769	100	0				QT
M	APOC3	P+LP+VUS_H	0.001	11	116830568	HDL	AFR__CSA__EUR__OTH	0.840479	+	+?+?++	0.340529	6.59969e-32	0.000345414	193970	134	0				QT
M	APOC3	P+LP+VUS_H	0.01	11	116830568	HDL	AFR__CSA__EUR__OTH	0.863301	+	+?+?++	0.340529	6.59969e-32	0.000345414	193970	134	0				QT
M	VPS33A	D	singleton	12	122232252	FAI	AFR__CSA__EAS__EUR__OTH	0.655588	+	+?-++-	26.388	6.86469e-32	0.000114519	192108	44	0				QT
B	PCDH15	PVS1_VSS	0.001	10	53806579	Oestrodiol	AFR__CSA__OTH	0.889107	+	++?+	1473.88	6.96625e-32	0.000614723	6507	8	0				QT
M	ANGPTL3	P+LP+VUS_H+D	0.001	1	62597568	Cholesterol	AFR__AMR__CSA__EUR__OTH	0.949009	-	-+-?--	-0.445259	7.36257e-32	0.00207582	210309	873.13	0				QT
M	G0S2	P+LP+VUS_H+D	0.001	1	209675685	FAI	AFR__CSA__EUR__OTH	0.79363	+	+?-?++	27.7436	7.94351e-32	0.000101828	191500	39	0				QT
M	G0S2	P+LP+VUS_H+D	0.01	1	209675685	FAI	AFR__CSA__EUR__OTH	0.845248	+	+?-?++	27.7436	7.94351e-32	0.000101828	191500	39	0				QT
M	ODAD3	P	0.001	19	11420838	Oestrodiol	EUR	0.728588	+	??+?	327.228	7.9811e-32	0.000271346	16584	9	0				QT
M	STOM	PVS1_M	0.001	9	121341205	FAI	EUR	0.79363	+	????+?	33.7453	8.31926e-32	7.01573e-05	178171	25	0				QT
M	STOM	PVS1_M	0.01	9	121341205	FAI	EUR	0.845248	+	????+?	33.7453	8.31926e-32	7.01573e-05	178171	25	0				QT
F	TMEM59L	P+LP	0.001	19	18612896	FAI	EUR__OTH	0.860216	+	????+-	4.42217	8.32228e-32	9.4089e-05	180680	34	0				QT
F	TMEM59L	P+LP	0.01	19	18612896	FAI	EUR__OTH	0.940317	+	????+-	4.42217	8.32228e-32	9.4089e-05	180680	34	0				QT
F	TMEM59L	PVS1_VS	0.001	19	18612896	FAI	EUR__OTH	0.860216	+	????+-	4.42217	8.32228e-32	9.4089e-05	180680	34	0				QT
F	TMEM59L	PVS1_VS	0.01	19	18612896	FAI	EUR__OTH	0.940317	+	????+-	4.42217	8.32228e-32	9.4089e-05	180680	34	0				QT
B	ANGPTL3	PVS1_VS	0.001	1	62597568	LDL	AFR__AMR__CSA__EAS__EUR__OTH	0.994287	-	------	-0.3396	8.87937e-32	0.000960171	459814	881	1				QT
B	ANGPTL3	PVS1_VS	0.01	1	62597568	LDL	AFR__AMR__CSA__EAS__EUR__OTH	1.02789	-	------	-0.3396	8.87937e-32	0.000960171	459814	881	1				QT
F	ANGPTL3	PVS1_VSS	0.001	1	62597568	Triglycerides	AFR__AMR__CSA__EAS__EUR__OTH	0.97581	-	------	-0.413387	9.20043e-32	0.00104387	249553	519	1				QT
F	ANGPTL3	PVS1_VSS	0.01	1	62597568	Triglycerides	AFR__AMR__CSA__EAS__EUR__OTH	1.04889	-	------	-0.413387	9.20043e-32	0.00104387	249553	519	1				QT
B	DECR2	PVS1_VSSM	singleton	16	401964	FAI	AFR__CSA__EUR__OTH	0.642733	+	+?+?++	17.7765	9.41543e-32	2.8039e-05	378431	21.22	0				QT
B	DECR2	PVS1_VSSMP	singleton	16	401964	FAI	AFR__CSA__EUR__OTH	0.642733	+	+?+?++	17.7765	9.41543e-32	2.8039e-05	378431	21.22	0				QT
F	TAF8	PVS1_S	singleton	6	42050542	Oestrodiol	CSA__EAS__EUR	0.873512	+	??+-+?	1747.38	9.58105e-32	4.71903e-05	52977	5	0				QT
M	FRYL	PVS1_VS	0.001	4	48499431	Oestrodiol	EUR	0.728588	+	??+?	245.067	9.93891e-32	0.000482393	16584	16	0				QT
M	FRYL	PVS1_VS	0.01	4	48499431	Oestrodiol	EUR	0.831645	+	??+?	245.067	9.93891e-32	0.000482393	16584	16	0				QT
B	PKD1	P+LP	0.001	16	2089733	Hypertension	AFR__CSA__EAS__EUR__OTH	0.927696	+	-+-++	18.4384	1.02615e-31	0.000954144	3332	54	0	478813	864.07	1	BT
B	PKD1	P+LP	0.01	16	2089733	Hypertension	AFR__CSA__EAS__EUR__OTH	0.9752	+	-+-++	18.4384	1.02615e-31	0.000954144	3332	54	0	478813	864.07	1	BT
M	ANGPTL3	P+LP+VUS_H+D	0.01	1	62597568	Cholesterol	AFR__AMR__CSA__EAS__EUR__OTH	0.993414	-	-+----	-0.437594	1.35968e-31	0.00212606	210984	897.13	0				QT
B	ANGPTL3	PVS1_VSS	0.001	1	62597568	LDL	AFR__AMR__CSA__EAS__EUR__OTH	0.994287	-	------	-0.32711	1.4278e-31	0.00102873	459814	944.05	1				QT
B	ANGPTL3	PVS1_VSS	0.01	1	62597568	LDL	AFR__AMR__CSA__EAS__EUR__OTH	1.02789	-	------	-0.32711	1.4278e-31	0.00102873	459814	944.05	1				QT
B	HNF1A	P	0.001	12	120978769	HbA1c	AFR__EAS__EUR	0.94188	+	-??++?	9.57816	1.46387e-31	7.3461e-05	435605	64	0				QT
B	HNF1A	P	0.01	12	120978769	HbA1c	AFR__EAS__EUR	0.968316	+	-??++?	9.57816	1.46387e-31	7.3461e-05	435605	64	0				QT
M	LPL	D	0.001	8	19939442	HDL	AFR__CSA__EAS__EUR__OTH	0.840479	-	+?----	-0.175903	1.49649e-31	0.00128992	194586	502	0				QT
M	LPL	D	0.01	8	19939442	HDL	AFR__CSA__EAS__EUR__OTH	0.863301	-	+?----	-0.175903	1.49649e-31	0.00128992	194586	502	0				QT
F	PDE3B	PVS1_VSSMP	0.01	11	14644077	Triglycerides	AFR__CSA__EAS__EUR__OTH	1.04889	-	-?-+--	-0.366615	1.62139e-31	0.00140753	249189	701.48	0				QT
M	CFAP74	P+LP	singleton	1	1922296	FAI	AFR__CSA__EAS__EUR__OTH	0.655588	+	+?-++-	21.6337	1.76618e-31	0.000166573	192108	64	0				QT
M	CETP	P+LP	0.001	16	56961990	HDL	AFR__CSA__EUR__OTH	0.840479	+	+?+?++	0.185503	2.55309e-31	0.00119294	193970	460.79	1				QT
M	CETP	P+LP	0.01	16	56961990	HDL	AFR__CSA__EUR__OTH	0.863301	+	+?+?++	0.185503	2.55309e-31	0.00119294	193970	460.79	1				QT
F	PDE3B	PVS1_VSSM	0.01	11	14644077	Triglycerides	AFR__CSA__EAS__EUR__OTH	1.04889	-	-?-+--	-0.366155	2.58499e-31	0.00140152	249189	698.48	0				QT
B	APOC3	P+LP+VUS_H+D	0.001	11	116830568	Apolipoprotein_A	AFR__AMR__CSA__EAS__EUR__OTH	0.675979	+	+++-++	0.145764	2.60274e-31	0.000764344	419314	639	1				QT
B	APOC3	P+LP+VUS_H+D	0.01	11	116830568	Apolipoprotein_A	AFR__AMR__CSA__EAS__EUR__OTH	0.670867	+	+++-++	0.145764	2.60274e-31	0.000764344	419314	639	1				QT
B	GLRA2	P+LP+VUS_H+D	0.001	23	14530066	FAI	AFR__CSA__EAS__EUR__OTH	0.817638	+	-?-++-	6.55973	3.02298e-31	0.000418176	380223	72	123				QT
B	GLRA2	P+LP+VUS_H+D	0.01	23	14530066	FAI	AFR__CSA__EAS__EUR__OTH	0.864406	+	-?-++-	6.55973	3.02298e-31	0.000418176	380223	72	123				QT
F	LPA	P+LP+VUS_H+D	0.001	6	160531735	Lipoprotein_A	AFR__AMR__CSA__EAS__EUR__OTH	0.961072	-	-+----	-11.4725	3.20528e-31	0.00622969	200342	2490.14	3				QT
M	SLC34A3	P+LP	0.001	9	137230939	eGFR	AFR__CSA__EAS__EUR__OTH	0.903041	-	-?----	-4.32768	3.31513e-31	0.0025346	210684	1068	0				QT
M	SLC34A3	P+LP	0.01	9	137230939	eGFR	AFR__CSA__EAS__EUR__OTH	0.908182	-	-?----	-4.32768	3.31513e-31	0.0025346	210684	1068	0				QT
B	PBDC1	PVS1_S	0.001	23	76173139	FAI	EUR	0.817638	+	????+?	22.5979	3.53404e-31	3.25894e-05	352875	7	8				QT
B	PBDC1	PVS1_S	0.01	23	76173139	FAI	EUR	0.864406	+	????+?	22.5979	3.53404e-31	3.25894e-05	352875	7	8				QT
B	SHBG	P+LP	0.001	17	7630196	SHBG	AFR__CSA__EAS__EUR__OTH	0.91136	-	-?----	-25.1536	3.55176e-31	0.000176141	417279	147	0				QT
B	SHBG	P+LP	0.01	17	7630196	SHBG	AFR__CSA__EAS__EUR__OTH	0.934308	-	-?----	-25.1536	3.55176e-31	0.000176141	417279	147	0				QT
B	SHBG	PVS1_VS	0.001	17	7630196	SHBG	AFR__CSA__EAS__EUR__OTH	0.91136	-	-?----	-25.1536	3.55176e-31	0.000176141	417279	147	0				QT
B	SHBG	PVS1_VS	0.01	17	7630196	SHBG	AFR__CSA__EAS__EUR__OTH	0.934308	-	-?----	-25.1536	3.55176e-31	0.000176141	417279	147	0				QT
B	PDE3B	PVS1_VSSM	0.001	11	14644077	HDL	AFR__CSA__EAS__EUR__OTH	0.810108	+	-?+-++	0.130312	3.92735e-31	0.00137284	421119	1156.26	0				QT
B	PDE3B	PVS1_VSSM	0.01	11	14644077	HDL	AFR__CSA__EAS__EUR__OTH	0.86135	+	-?+-++	0.130312	3.92735e-31	0.00137284	421119	1156.26	0				QT
F	DDX52	P+LP	singleton	17	37614305	FAI	AFR__CSA__EUR	0.74068	+	+?-?+?	4.63576	4.35497e-31	8.73411e-05	180956	31.61	0				QT
F	DDX52	PVS1_VS	singleton	17	37614305	FAI	AFR__CSA__EUR	0.74068	+	+?-?+?	4.63576	4.35497e-31	8.73411e-05	180956	31.61	0				QT
F	APOB	P+LP+VUS_H+D	0.001	2	21001742	Cholesterol	AFR__AMR__CSA__EAS__EUR__OTH	0.950335	-	-+-+--	-0.201657	4.49583e-31	0.00811959	249693	4052.81	1				QT
B	PKD1	PVS1_VS	0.001	16	2089733	eGFR	AFR__CSA__EAS__EUR__OTH	0.885874	-	-?++--	-7.59437	4.60636e-31	0.000460205	459902	421.3	1				QT
B	PKD1	PVS1_VS	0.01	16	2089733	eGFR	AFR__CSA__EAS__EUR__OTH	0.940088	-	-?++--	-7.59437	4.60636e-31	0.000460205	459902	421.3	1				QT
F	APOA5	PVS1_VS	0.001	11	116790137	Triglycerides	EUR	0.97581	+	????+?	1.27594	4.61371e-31	0.000123197	231336	57	0				QT
F	APOA5	PVS1_VS	0.01	11	116790137	Triglycerides	EUR	1.04889	+	????+?	1.27594	4.61371e-31	0.000123197	231336	57	0				QT
M	LYN	P+LP+VUS_H+D	singleton	8	55880105	FAI	AFR__AMR__CSA__EAS__EUR__OTH	0.655588	+	----+-	22.1949	4.64031e-31	0.000124815	192285	48	0				QT
F	ELOVL4	PVS1_S	0.001	6	79916614	HbA1c	EUR	0.921872	+	????+?	25.0324	4.81149e-31	1.51108e-05	231623	7	0				QT
F	ELOVL4	PVS1_S	0.01	6	79916614	HbA1c	EUR	0.924101	+	????+?	25.0324	4.81149e-31	1.51108e-05	231623	7	0				QT
M	SH2D2A	P+LP+VUS_H	0.01	1	156807181	Oestrodiol	AFR__EUR	0.831645	+	-?+?	86.1416	5.61441e-31	0.000263852	17055	9	0				QT
M	MIS18BP1	P+LP	singleton	14	45204112	FAI	AFR__CSA__EUR__OTH	0.655588	+	-?-?+-	26.9729	5.81384e-31	0.000104439	191500	40	0				QT
M	MIS18BP1	PVS1_VS	singleton	14	45204112	FAI	AFR__CSA__EUR__OTH	0.655588	+	-?-?+-	26.9729	5.81384e-31	0.000104439	191500	40	0				QT
M	C2orf81	P+LP+VUS_H+D	singleton	2	74414338	Oestrodiol	EUR	0.624107	+	??+?	341.878	6.06404e-31	0.000309683	16584	10.27	0				QT
B	NPC1L1	P+LP+VUS_H+D	0.01	7	44513462	LDL	AFR__AMR__CSA__EAS__EUR__OTH	1.02789	-	-+----	-0.105444	6.15264e-31	0.00967759	459814	8873.78	13				QT
M	CETP	P+LP+VUS_H+D	0.001	16	56961990	HDL	AFR__CSA__EAS__EUR__OTH	0.840479	+	+?++++	0.121452	6.50071e-31	0.0027016	194586	1049.39	1				QT
M	CETP	P+LP+VUS_H+D	0.01	16	56961990	HDL	AFR__CSA__EAS__EUR__OTH	0.863301	+	+?++++	0.121452	6.50071e-31	0.0027016	194586	1049.39	1				QT
M	FAM20C	PVS1_VS	0.001	7	193200	Oestrodiol	EUR	0.728588	+	??+?	432.179	6.66509e-31	0.000150748	16584	5	0				QT
M	FAM20C	PVS1_VS	0.01	7	193200	Oestrodiol	EUR	0.831645	+	??+?	432.179	6.66509e-31	0.000150748	16584	5	0				QT
M	SCARB1	P+LP+VUS_H+D	0.001	12	124782684	Apolipoprotein_A	AFR__AMR__CSA__EAS__EUR__OTH	0.699283	+	+-+-++	0.101746	6.9881e-31	0.0026101	194474	1013.2	1				QT
M	SCARB1	P+LP+VUS_H+D	0.01	12	124782684	Apolipoprotein_A	AFR__AMR__CSA__EAS__EUR__OTH	0.712529	+	+-+-++	0.101746	6.9881e-31	0.0026101	194474	1013.2	1				QT
F	LPL	D	0.01	8	19939442	HDL	AFR__AMR__CSA__EAS__EUR__OTH	0.812249	-	------	-0.19911	7.06258e-31	0.00129153	226862	586	0				QT
B	HNRNPA1L3	P+LP+VUS_H	0.001	16	51645818	Oestrodiol	CSA__OTH	0.889107	+	?+?+	1987.46	7.09527e-31	0.000548968	4554	5	0				QT
B	HNRNPA1L3	P+LP+VUS_H	0.01	16	51645818	Oestrodiol	CSA__OTH	0.927274	+	?+?+	1987.46	7.09527e-31	0.000548968	4554	5	0				QT
B	HNRNPA1L3	PVS1_S	0.001	16	51645818	Oestrodiol	CSA__OTH	0.889107	+	?+?+	1987.46	7.09527e-31	0.000548968	4554	5	0				QT
B	HNRNPA1L3	PVS1_S	0.01	16	51645818	Oestrodiol	CSA__OTH	0.927274	+	?+?+	1987.46	7.09527e-31	0.000548968	4554	5	0				QT
B	HNRNPA1L3	PVS1_VSS	0.001	16	51645818	Oestrodiol	CSA__OTH	0.889107	+	?+?+	1987.46	7.09527e-31	0.000548968	4554	5	0				QT
B	HNRNPA1L3	PVS1_VSS	0.01	16	51645818	Oestrodiol	CSA__OTH	0.927274	+	?+?+	1987.46	7.09527e-31	0.000548968	4554	5	0				QT
M	APOC3	PVS1_VSSM	0.001	11	116830568	HDL	AFR__CSA__EUR__OTH	0.840479	+	+?+?++	0.344711	7.78093e-31	0.000324792	193970	126	0				QT
M	APOC3	PVS1_VSSM	0.01	11	116830568	HDL	AFR__CSA__EUR__OTH	0.863301	+	+?+?++	0.344711	7.78093e-31	0.000324792	193970	126	0				QT
F	CETP	P+LP+VUS_H+D	0.01	16	56961990	HDL	AFR__AMR__CSA__EAS__EUR__OTH	0.812249	+	++++++	0.139872	8.59661e-31	0.00270769	226862	1224.54	2				QT
B	ABCA1	PVS1_VS	0.001	9	104784318	Cholesterol	AFR__CSA__EUR__OTH	0.97357	-	-?-?--	-0.738195	8.70084e-31	0.000339574	457995	311.05	0				QT
B	ABCA1	PVS1_VS	0.01	9	104784318	Cholesterol	AFR__CSA__EUR__OTH	0.997683	-	-?-?--	-0.738195	8.70084e-31	0.000339574	457995	311.05	0				QT
M	GLRA2	D	0.001	23	14530066	FAI	AFR__CSA__EUR__OTH	0.79363	+	-?-?+-	11.5457	8.93158e-31	0.000281984	191500	0	54				QT
M	ANGPTL3	PVS1_VS	0.01	1	62597568	Triglycerides	AFR__AMR__CSA__EAS__EUR__OTH	1.01197	-	-+----	-0.644263	9.03456e-31	0.00094422	210756	398	0				QT
M	GRAMD1C	PVS1_VSSM	singleton	3	113838910	Oestrodiol	AFR__EUR__OTH	0.624107	+	+?++	99.8268	9.06935e-31	0.000368043	17661	13	0				QT
[truncated: 17,757 more rows]

## Sheet: S. Table 4
#Supplementary Table 4. Summary of known and novel discoveries.
Gene	Mask	Cytogenetic location	Max_AF	Trait	Direction	Effect	Pval	OMIM	Phenotype	Sex	Ancestry_simplified	Finding	Supporting evidence	GWAS	Linkage	Animal	Comment
HEATR5B	PVS1_VSSMP	2p22.2	0.001	CKD_All	+	2.98156	1.99799e-07	.	CKD	F	EUR+	Novel	-	-	-	-	-
ABCA1	P	9q31.1	singleton	Apolipoprotein_A(-);HDL(-)	+	Atherogenic	.	HDL deficiency, familial, 1 (AD); Tangier disease (AR)	DLP	M	EUR+	Known	.	.	.	.	.
ABCA1	P+LP+VUS_H	9q31.1	0.001	Cholesterol(-);LDL(-)	-	Protective	.	HDL deficiency, familial, 1 (AD); Tangier disease (AR)	DLP	F	EUR+	Known	.	.	.	.	.
ABCA6	P+LP+VUS_H+D	17q24.3	0.001	Apolipoprotein_B(+);Cholesterol(+);LDL(+)	+	Atherogenic	.	.	DLP	F	EUR+	Known	.	.	.	.	.
ABCG5	P+LP+VUS_H+D	2p21	0.01	DLP_All	+	1.23379	6.31536e-09	Sitosterolemia 2 (AR)	DLP	B	EUR+	Known	.	.	.	.	.
ABCG5	P+LP+VUS_H+D	2p21	0.01	Pure_hypercholesterolemia	+	1.22586	4.07231e-08	Sitosterolemia 2 (AR)	DLP	B	EUR+	Known	.	.	.	.	.
ABCG5	P+LP+VUS_H	2p21	0.001	Apolipoprotein_B(+);Cholesterol(+);LDL(+)	+	Atherogenic	.	Sitosterolemia 2 (AR)	DLP	F	EUR+	Dominant_presentation_of_the_recessive_disease	.	.	.	.	.
ABCG8	P	2p21	0.01	Apolipoprotein_B(+);Cholesterol(+);LDL(+)	+	Atherogenic	.	{Gallbladder disease 4} ; Sitosterolemia 1 (AR)	DLP	F	EUR+	Dominant_presentation_of_the_recessive_disease	.	.	.	.	.
ACVR1	PVS1_VSSMP	2q24.1	0.001	Type_2_diabetes	+	3.69008	1.55502e-07	Fibrodysplasia ossificans progressiva (AD)	DM	B	EUR+	Novel	+	+	-	-	https://pmc.ncbi.nlm.nih.gov/articles/PMC12361344/
ACVR1	PVS1_VSSMP	2q24.1	0.001	DM_All	+	3.57551	3.78759e-07	Fibrodysplasia ossificans progressiva (AD)	DM	B	EUR+	Novel	+	+	-	-	https://pmc.ncbi.nlm.nih.gov/articles/PMC12361344/
AFF3	PVS1_VS	2q11.2	0.001	BMI	+	3.28527	1.54567e-06	KINSSHIP syndrome (AD)	OB	F	EUR+	Novel	+	+	-	-	-
AHSP	PVS1_M	16p11.2	0.001	SBP	+	38.7941	1.97989e-10	.	HT	F	EUR+	Novel	+	-	-	+ (PMID:30295646)	+ (PMID:30295646)
AHSP	PVS1_M	16p11.2	0.001	MAP	+	17.911	6.74043e-07	.	HT	F	EUR+	Novel	+	-	-	+ (PMID:30295646)	+ (PMID:30295646)
ALB	P+LP	4q13.3	singleton	Apolipoprotein_B(+);Cholesterol(+);LDL(+)	+	Atherogenic	.	?[Dysalbuminemic hypertriiodothyroninemia] (AD, AR); [Dysalbuminemic hyperthyroxinemia] (AD, AR); Analbuminemia (AR)	DLP	M	EUR+	Dominant_presentation_of_the_recessive_disease	.	.	.	.	.
ALDOB	P+LP+VUS_H+D	9q31.1	0.01	eGFR	+	1.06568	1.36118e-13	Fructose intolerance, hereditary (AR)	CKD	B	EUR+	Dominant_presentation_of_the_recessive_disease	.	.	.	.	.
ALKBH1	P+LP	14q24.3	singleton	HbA1c+Glucose	+	.	8.91923e-08	.	DM	B	EUR+	Novel	-	-	-	-	-
ANGPTL3	P+LP+VUS_H+D	1p31.3	0.001	DLP_All	-	0.684097	6.09182e-09	Hypobetalipoproteinemia, familial, 2 (AR)	DLP	B	EUR+	Known	.	.	.	.	.
ANGPTL3	P+LP+VUS_H+D	1p31.3	0.001	Pure_hypercholesterolemia	-	0.681415	1.29238e-08	Hypobetalipoproteinemia, familial, 2 (AR)	DLP	B	EUR+	Known	.	.	.	.	.
ANGPTL4	P+LP	19p13.2	0.001	HDL(+);Triglycerides(-)	-	Protective	.	Plasma triglyceride level QTL, low (AD)	DLP	M	EUR+	Known	.	.	.	.	.
ANGPTL8	P+LP	19p13.2	0.001	Apolipoprotein_A(+);HDL(+);Triglycerides(-)	-	Protective	.	.	DLP	B	EUR+	Known	.	.	.	.	.
ANKH	PVS1_VSS	5p15.2	singleton	HbA1c+Glucose	+	.	2.06392e-15	Chondrocalcinosis 2 (AD); Craniometaphyseal dysplasia (AD)	DM	B	EUR	Known	.	.	.	.	.
AP5Z1	D	7p22.1	0.001	Obesity	+	1.64997	3.5602e-07	Spastic paraplegia 48, autosomal recessive (AR)	OB	M	EUR+	Novel	-	-	-	-	-
APBA1	PVS1_VS	9q21.12	0.001	BMI	+	2.09766	5.69509e-08	.	OB	B	EUR+	Known	.	.	.	.	.
APOA1	P+LP+VUS_H	11q23.3	0.001	Apolipoprotein_A(-);HDL(-)	+	Atherogenic	.	Amyloidosis, hereditary systemic 3 (AD); Hypoalphalipoproteinemia, primary, 2 (AR); Hypoalphalipoproteinemia, primary, 2, intermediate (AD)	DLP	M	EUR+	Known	.	.	.	.	.
APOA5	P+LP+VUS_H	11q23.3	0.001	DLP_All	+	1.84669	1.73044e-08	{Hypertriglyceridemia, susceptibility to} (AD); Hyperchylomicronemia, late-onset (AD)	DLP	B	EUR+	Known	.	.	.	.	.
APOA5	PVS1_VSS	11q23.3	0.001	Pure_hypercholesterolemia	+	1.8266	6.96971e-08	{Hypertriglyceridemia, susceptibility to} (AD); Hyperchylomicronemia, late-onset (AD)	DLP	B	EUR+	Known	.	.	.	.	.
APOA5	P+LP+VUS_H+D	11q23.3	0.001	Apolipoprotein_A(-);HDL(-);Triglycerides(+)	+	Atherogenic	.	{Hypertriglyceridemia, susceptibility to} (AD); Hyperchylomicronemia, late-onset (AD)	DLP	M	EUR	Known	.	.	.	.	.
APOB	PVS1_VS	2p24.1	0.001	DLP_All	-	0.545723	8.54816e-13	Hypercholesterolemia, familial, 2 (AD); Hypobetalipoproteinemia (AR)	DLP	B	EUR+	Known	.	.	.	.	.
APOB	PVS1_VS	2p24.1	0.001	Pure_hypercholesterolemia	-	0.562052	4.17916e-11	Hypercholesterolemia, familial, 2 (AD); Hypobetalipoproteinemia (AR)	DLP	B	EUR+	Known	.	.	.	.	.
APOB	PVS1_VS	2p24.1	0.001	Apolipoprotein_A(+);Apolipoprotein_B(-);Cholesterol(-);HDL(+);LDL(-);Triglycerides(-)	-	Protective	.	Hypercholesterolemia, familial, 2 (AD); Hypobetalipoproteinemia (AR)	DLP	M	EUR+	Known	.	.	.	.	.
APOC3	PVS1_P	11q23.3	0.001	HbA1c+Glucose	+	.	4.79442e-22	Apolipoprotein C-III deficiency	DM	F	EUR+	Novel	+	-	-	+	+
APOC3	PVS1_VSSMP	11q23.3	0.01	eGFR	-	-1.51139	3.29642e-09	Apolipoprotein C-III deficiency	CKD	B	EUR+	Novel	+	+	-	-	-
APOC3	PVS1_VSSMP	11q23.3	0.01	DLP_All	-	0.722816	4.75478e-08	Apolipoprotein C-III deficiency	DLP	B	EUR+	Known	.	.	.	.	.
APOC3	PVS1_VSSMP	11q23.3	0.01	Pure_hypercholesterolemia	-	0.739844	7.88005e-07	Apolipoprotein C-III deficiency	DLP	B	EUR+	Known	.	.	.	.	.
APOC3	PVS1_P	11q23.3	0.01	Apolipoprotein_A(+);Apolipoprotein_B(-);HDL(+);LDL(-);Triglycerides(-)	-	Protective	.	Apolipoprotein C-III deficiency	DLP	M	EUR+	Known	.	.	.	.	.
APOE	P+LP+VUS_H	19q13.32	0.001	Apolipoprotein_B(-);LDL(-)	-	Protective	.	{?Alzheimer disease, protection against, due to APOE3-Christchurch} (AD); {?Macular degeneration, age-related} (AD); {Coronary artery disease, severe, susceptibility to} ; Alzheimer disease 2 (AD); Hyperlipoproteinemia, type III ; Lipoprotein glomerulopathy ; Sea-blue histiocyte disease (AR)	DLP	F	EUR+	Known	.	.	.	.	.
ARG1	P+LP	6q23.2	0.001	eGFR	-	-6.67768	1.01687e-10	Argininemia (AR)	CKD	M	EUR+	Dominant_presentation_of_the_recessive_disease	.	.	.	.	.
ASB18	P+LP	2q37.2	singleton	HbA1c+Glucose	+	.	1.67942e-09	.	DM	M	EUR+	Novel	-	-	-	-	-
ASCL2	P+LP	11p15.5	0.01	HbA1c+Glucose	+	.	1.26555e-09	.	DM	F	EUR	Novel	+	+	-	-	-
ASGR1	P+LP+VUS_H	17p13.1	0.001	Apolipoprotein_B(-);Cholesterol(-);LDL(-)	-	Protective	.	.	DLP	M	EUR+	Known	.	.	.	.	.
HEATR5B	PVS1_VSSMP	2p22.2	0.001	Chronic_kidney_disease	+	2.9099	4.8322e-07	.	CKD	F	EUR+	Novel	-	-	-	-	-
ATF4	PVS1_M	22q13.1	singleton	BMI	+	11.3688	1.39248e-08	.	OB	B	EUR+	Novel	-	-	-	-	-
ATP13A1	P+LP+VUS_H+D	19p13.11	0.001	BMI	+	0.599949	1.03111e-06	.	OB	B	EUR+	Known	.	.	.	.	.
ATP1A2	P+LP+VUS_H	1q23.2	0.001	BMI	+	0.993069	3.62647e-07	Alternating hemiplegia of childhood 1 (AD); Developmental and epileptic encephalopathy 98 (AD); Fetal akinesia, respiratory insufficiency, microcephaly, polymicrogyria, and dysmorphic facies (AR); Migraine, familial basilar (AD); Migraine, familial hemiplegic, 2 (AD)	OB	B	EUR+	Novel	+	-	-	+ PMID:16286513	+ PMID:16286513
ATP8A2	PVS1_S	13q12.13	singleton	SBP	+	41.5774	2.4745e-06	Cerebellar ataxia, impaired intellectual development, and dysequilibrium syndrome 4 (AR)	HT	M	EUR+	Novel	+	+	-	-	-
ORAI3	P+LP+VUS_H+D	16p11.2	0.001	Chronic_kidney_disease	+	2.97432	1.53285e-06	.	CKD	M	EUR+	Novel	+	-	Chromosome 16p11.2 deletion syndrome, 220kb	-	-
BMAL1	PVS1_S	11p15.3	singleton	HbA1c+Glucose	+	.	1.00289e-09	.	DM	M	EUR+	Novel	+	+	-	+	+
BMP8B	PVS1_S	1p34.2	0.01	HbA1c+Glucose	+	.	1.00922e-08	.	DM	M	EUR+	Novel	-	-	-	-	-
BTNL9	PVS1_M	5q35.3	singleton	HbA1c+Glucose	+	.	7.14934e-08	.	DM	F	EUR+	Novel	-	-	-	-	-
C1orf167	PVS1_M	1p36.22	singleton	HbA1c+Glucose	+	.	6.92538e-08	.	DM	M	EUR	Novel	-	-	-	-	-
C1QC	PVS1_S	1p36.12	singleton	HbA1c+Glucose	+	.	2.73632e-08	C1q deficiency 3 (AR)	DM	B	EUR	Novel	-	-	-	-	-
CALCR	P+LP+VUS_H+D	7q21.3	0.01	BMI	+	0.522281	2.19798e-06	{Osteoporosis, postmenopausal, susceptibility} (AD)	OB	B	EUR+	Known	.	.	.	.	.
CASTOR2	D	7q11.23	0.01	BMI	+	0.565643	2.98437e-07	.	OB	B	EUR+	Novel	+	+	-	-	-
CCM2	PVS1_VSS	7p13	singleton	BMI	+	5.17506	1.3167e-06	Cerebral cavernous malformations-2 (AD)	OB	M	EUR+	Novel	-	-	-	-	-
CD36	P+LP	7q21.11	0.001	Apolipoprotein_A(+);HDL(+)	-	Protective	.	{Coronary heart disease, susceptibility to, 7} ; {Malaria, cerebral, reduced risk of} ; {Malaria, cerebral, susceptibility to} ; Platelet glycoprotein IV deficiency (AR)	DLP	M	EUR+	Known	.	.	.	.	.
CD47	PVS1_VSS	3q13.12	singleton	HbA1c+Glucose	+	.	7.25995e-08	.	DM	F	EUR	Novel	-	-	-	-	-
CELF4	P+LP	18q12.2	singleton	HbA1c+Glucose	+	.	2.23122e-20	.	DM	F	EUR+	Novel	+	+	-	-	-
CEP85L	P+LP	6q22.31	singleton	Type_2_diabetes	+	14.0666	2.40517e-06	Lissencephaly 10 (AD)	DM	F	EUR+	Novel	-	-	-	-	-
CETP	P+LP+VUS_H+D	16q13	0.001	Apolipoprotein_A(+);Apolipoprotein_B(-);HDL(+)	-	Protective	.	[High density lipoprotein cholesterol level QTL 10] (AD); Hyperalphalipoproteinemia (AD)	DLP	M	EUR+	Known	.	.	.	.	.
CKAP5	PVS1_VSSMP	11p11.2	0.001	BMI	+	2.8569	2.09437e-06	.	OB	B	EUR+	Novel	+	+	-	-	-
CLDN10	P+LP+VUS_H	13q32.1	0.001	eGFR	-	-4.12618	1.37026e-13	HELIX syndrome (AR)	CKD	B	EUR	Dominant_presentation_of_the_recessive_disease	.	.	.	.	.
CLPX	P+LP+VUS_H+D	15q22.31	0.01	eGFR	-	-1.48427	7.97871e-12	?Protoporphyria, erythropoietic, 2 (AD)	CKD	B	EUR+	Known	.	.	.	.	.
COL16A1	P+LP+VUS_H+D	1p35.2	0.001	BMI	-	-0.512591	2.29108e-06	.	OB	F	EUR+	Novel	+	+	-	-	-
COL18A1	P+LP	21q22.3	0.001	Apolipoprotein_A(-);HDL(-)	+	Atherogenic	.	Glaucoma, primary closed-angle (AD); Knobloch syndrome, type 1 (AR)	DLP	B	EUR+	Known	.	.	.	.	.
COL21A1	P+LP+VUS_H+D	6p12.1	0.01	SBP	+	2.39679	9.40384e-18	.	HT	B	EUR+	Known	.	.	.	.	.
COL4A4	PVS1_VS	2q36.3	0.001	Essential_hypertension	+	1.43326	1.36173e-08	Alport syndrome 2, autosomal recessive (AR); Hematuria, familial benign, 1 (AD)	HT	B	EUR+	Known	.	.	.	.	.
COL4A4	PVS1_VS	2q36.3	0.001	HT_All	+	1.42887	1.63511e-08	Alport syndrome 2, autosomal recessive (AR); Hematuria, familial benign, 1 (AD)	HT	B	EUR+	Known	.	.	.	.	.
COL4A4	P+LP	2q36.3	0.001	Chronic_kidney_disease	+	1.59531	7.21559e-08	Alport syndrome 2, autosomal recessive (AR); Hematuria, familial benign, 1 (AD)	CKD	B	EUR+	Known	.	.	.	.	.
COL4A4	P+LP	2q36.3	0.001	CKD_All	+	1.58132	1.21112e-07	Alport syndrome 2, autosomal recessive (AR); Hematuria, familial benign, 1 (AD)	CKD	B	EUR+	Known	.	.	.	.	.
COPB1	PVS1_S	11p15.2	singleton	SBP	+	43.1636	8.28647e-07	Baralle-Macken syndrome (AR)	HT	M	EUR+	Novel	-	-	-	-	-
CPSF6	PVS1_VSSM	12q15	singleton	BMI	+	8.71823	1.4558e-06	.	OB	B	EUR+	Novel	+	+	-	-	-
CREB3L3	PVS1_VSS	19p13.3	0.001	Apolipoprotein_A(-);Triglycerides(+)	+	Atherogenic	.	Hypertriglyceridemia 2 (AD)	DLP	B	EUR+	Known	.	.	.	.	.
CREBBP	PVS1_VS	16p13.3	singleton	BMI	+	7.37016	8.6713e-07	Menke-Hennekam syndrome 1 (AD); Rubinstein-Taybi syndrome 1 (AD)	OB	M	EUR+	Known	.	.	.	.	.
CREBBP	PVS1_VSS	16p13.3	singleton	HbA1c+Glucose	+	.	7.33272e-07	Menke-Hennekam syndrome 1 (AD); Rubinstein-Taybi syndrome 1 (AD)	DM	B	EUR+	Novel	+	-	-	+	+
CREM	PVS1_VSS	10p11.21	0.001	Hypertension	+	19.7972	2.58093e-06	.	HT	B	EUR+	Novel	-	-	-	-	-
CYP2E1	PVS1_VSS	10q26.3	singleton	Essential_hypertension	+	22.1179	1.54893e-06	.	HT	F	EUR+	Novel	-	-	-	-	-
CYP2E1	PVS1_VSS	10q26.3	singleton	HT_All	+	21.5323	1.76634e-06	.	HT	F	EUR+	Novel	-	-	-	-	-
DACT2	PVS1_S	6q27	singleton	BMI	+	4.37572	9.82593e-07	.	OB	M	EUR+	Novel	-	-	-	-	-
DBH	P+LP+VUS_H+D	9q34.2	0.01	DBP	-	-0.781016	5.03774e-11	Orthostatic hypotension 1, due to DBH deficiency (AR)	HT	B	EUR+	Known	.	.	.	.	.
DBH	P+LP+VUS_H+D	9q34.2	0.01	Essential_hypertension	-	0.862664	1.51722e-10	Orthostatic hypotension 1, due to DBH deficiency (AR)	HT	B	EUR+	Known	.	.	.	.	.
DBH	P+LP+VUS_H+D	9q34.2	0.01	HT_All	-	0.862947	1.53012e-10	Orthostatic hypotension 1, due to DBH deficiency (AR)	HT	B	EUR+	Known	.	.	.	.	.
DBH	P+LP+VUS_H+D	9q34.2	0.01	MAP	-	-0.725252	2.24829e-09	Orthostatic hypotension 1, due to DBH deficiency (AR)	HT	B	EUR+	Known	.	.	.	.	.
DBH	P+LP+VUS_H+D	9q34.2	0.01	SBP	-	-1.01656	7.29544e-07	Orthostatic hypotension 1, due to DBH deficiency (AR)	HT	B	EUR+	Known	.	.	.	.	.
DDR2	PVS1_S	1q23.3	0.01	HbA1c+Glucose	+	.	5.87022e-08	Spondylometaepiphyseal dysplasia, short limb-hand type (AR); Warburg-Cinotti syndrome (AD)	DM	F	EUR+	Novel	+	-	-	+	-
DEFB114	PVS1_VSSM	6p12.3	singleton	HbA1c+Glucose	+	.	1.91639e-06	.	DM	B	EUR+	Novel	-	-	-	-	-
DENR	P+LP	12q24.31	0.001	BMI	+	8.94295	1.82624e-08	.	OB	F	EUR+	Novel	+	+	-	-	-
DENR	PVS1_VSS	12q24.31	0.001	Obesity	+	16.8099	2.20495e-07	.	OB	F	EUR+	Novel	+	+	-	-	-
DGAT2	P+LP+VUS_H+D	11q13.5	0.01	Apolipoprotein_A(-);HDL(-)	+	Atherogenic	.	.	DLP	B	EUR+	Known	.	.	.	.	.
DHX36	PVS1_S	3q25.2	0.01	HbA1c+Glucose	+	.	1.99144e-09	.	DM	F	EUR	Novel	-	-	-	-	-
DIDO1	PVS1_VSSM	20q13.33	0.001	BMI	+	4.87149	3.79259e-14	.	OB	F	EUR+	Known	.	.	.	.	.
DIMT1	D	5q12.1	0.01	Gestational_diabetes_mellitus	+	26.8565	1.90651e-06	.	DM	B	EUR+	Novel	-	-	-	-	-
DNAJC13	P+LP+VUS_H+D	3q22.1	0.01	Pure_hypercholesterolemia	-	0.760344	5.29962e-08	.	DLP	F	EUR+	Novel	+	+	-	-	-
DNAJC13	P+LP+VUS_H+D	3q22.1	0.01	DLP_All	-	0.782532	4.22768e-07	.	DLP	F	EUR+	Novel	+	+	-	-	-
DNMT1	PVS1_VS	19p13.2	singleton	HbA1c+Glucose	+	.	2.00158e-12	Cerebellar ataxia, deafness, and narcolepsy, autosomal dominant (AD); Neuropathy, hereditary sensory, type IE (AD)	DM	M	EUR+	Novel	-	-	-	-	-
DNMT3B	PVS1_S	20q11.21	singleton	BMI	+	10.483	5.44423e-10	Facioscapulohumeral muscular dystrophy 4, digenic (DD); Immunodeficiency-centromeric instability-facial anomalies syndrome 1 (AR)	OB	B	EUR+	Novel	+	+	-	+	https://pmc.ncbi.nlm.nih.gov/articles/PMC8393658/
PACC1	P+LP	1q32.3	singleton	Chronic_kidney_disease	+	15.9262	1.15897e-06	.	CKD	B	EUR+	Novel	-	-	-	-	.
DOCK1	PVS1_M	10q26.2	singleton	Obesity	+	11.6774	8.8601e-07	.	OB	B	EUR+	Novel	+	+	-	-	.
DSG3	PVS1_M	18q12.1	singleton	HbA1c+Glucose	+	.	3.94939e-08	Blistering, acantholytic, of oral and laryngeal mucosa (AR)	DM	M	EUR+	Novel	-	-	-	-	-
DPP9	P+LP+VUS_H+D	19p13.3	0.01	BMI	-	-0.195395	2.23452e-06	Hatipoglu immunodeficiency syndrome (AR)	OB	B	EUR+	Novel	-	-	-	-	-
DZANK1	P+LP+VUS_H	20p11.23	singleton	Type_2_diabetes	+	5.8593	9.14289e-07	.	DM	F	EUR+	Novel	-	-	-	-	-
ECD	P+LP+VUS_H	10q22.2	0.001	Essential_hypertension	-	0.556429	1.45547e-06	.	HT	M	EUR+	Novel	+	+	-	-	-
ECD	P+LP+VUS_H	10q22.2	0.001	HT_All	-	0.558564	1.71435e-06	.	HT	M	EUR+	Novel	+	+	-	-	-
EDEM3	P+LP+VUS_H+D	1q25.3	0.001	eGFR	-	-1.69268	1.8699e-06	Congenital disorder of glycosylation, type IIv (AR)	CKD	B	EUR+	Known	.	.	.	.	.
DTNB	D	2p23.3	singleton	BMI	+	2.19115	9.5235e-07	.	OB	B	EUR+	Novel	+	+	-	-	-
EGR3	P+LP+VUS_H	8p21.3	singleton	BMI	+	6.67493	7.9102e-07	.	OB	F	EUR+	Novel	-	-	-	-	-
EGR3	P+LP+VUS_H+D	8p21.3	singleton	Obesity	+	7.0239	1.92226e-06	.	OB	B	EUR+	Novel	-	-	-	-	-
ELOVL4	PVS1_S	6q14.1	0.01	HbA1c+Glucose	+	.	6.87734e-31	Ichthyosis, spastic quadriplegia, and impaired intellectual development (AR); Spinocerebellar ataxia 34 (AD); Stargardt disease 3 (AD)	DM	F	EUR	Novel	-	-	-	-	-
PACC1	P+LP	1q32.3	singleton	CKD_All	+	15.3659	1.34761e-06	.	CKD	B	EUR+	Novel	-	-	-	-	.
EVI5	P+LP+VUS_H+D	1p22.1	0.001	Apolipoprotein_B(+);Cholesterol(+);LDL(+)	+	Atherogenic	.	.	DLP	F	EUR+	Known	.	.	.	.	.
FAHD2A	P+LP+VUS_H+D	2q11.1	singleton	HbA1c+Glucose	+	.	6.22585e-09	.	DM	F	EUR+	Novel	-	-	-	-	-
FAM118A	PVS1_VSSMP	22q13.31	singleton	DM_All	+	8.70862	5.40261e-07	.	DM	M	EUR+	Novel	+	+	-	-	-
FES	P+LP+VUS_H+D	15q26.1	0.001	Essential_hypertension	+	1.39796	4.0445e-09	.	HT	B	EUR+	Known	.	.	.	.	.
FES	P+LP+VUS_H+D	15q26.1	0.001	HT_All	+	1.38726	7.91725e-09	.	HT	B	EUR+	Known	.	.	.	.	.
FES	P+LP+VUS_H+D	15q26.1	0.001	SBP	+	2.76115	7.03729e-08	.	HT	B	EUR+	Known	.	.	.	.	.
FES	P+LP+VUS_H+D	15q26.1	0.001	MAP	+	1.59377	1.36795e-07	.	HT	B	EUR+	Known	.	.	.	.	.
FRMD7	P	Xq26.2	0.01	HbA1c+Glucose	+	.	2.40771e-13	Nystagmus 1, congenital, X-linked (XL); Nystagmus, infantile periodic alternating, X-linked (XL)	DM	B	EUR+	Novel	-	-	-	-	-
G0S2	P+LP+VUS_H	1q32.2	0.01	HbA1c+Glucose	+	.	1.40218e-08	.	DM	F	EUR	Novel	-	-	-	-	-
G6PC1	P+LP+VUS_H+D	17q21.31	0.001	eGFR	+	2.04703	3.36743e-11	Glycogen storage disease Ia (AR)	CKD	B	EUR+	Dominant_presentation_of_the_recessive_disease	.	.	.	.	.
G6PC1	P+LP	17q21.31	0.001	Apolipoprotein_B(+);Cholesterol(+);Triglycerides(+)	+	Atherogenic	.	Glycogen storage disease Ia (AR)	DLP	B	EUR+	Known	.	.	.	.	.
G6PC2	P+LP+VUS_H+D	2q31.1	0.01	HbA1c+Glucose	-	.	2.8074e-25	.	DM	B	EUR+	Known	.	.	.	.	.
GAS6	P+LP+VUS_H	13q34	0.001	Apolipoprotein_B(+);Cholesterol(+);LDL(+);Triglycerides(+)	+	Atherogenic	.	.	DLP	B	EUR+	Novel	+	+	-	-	-
GATA5	P+LP+VUS_H+D	20q13.33	0.01	eGFR	+	0.820493	2.6515e-08	Congenital heart defects, multiple types, 5 (AD, AR)	CKD	B	EUR+	Novel	+	+	-	+	+
GATA5	D	20q13.33	0.01	DBP	+	0.771462	5.48809e-08	Congenital heart defects, multiple types, 5 (AD, AR)	HT	B	EUR+	Novel	-	-	-	-	-
GATA5	D	20q13.33	0.01	MAP	+	0.787513	5.67306e-08	Congenital heart defects, multiple types, 5 (AD, AR)	HT	B	EUR+	Novel	-	-	-	-	-
GATA5	P+LP+VUS_H+D	20q13.33	0.01	SBP	+	1.19885	8.76937e-07	Congenital heart defects, multiple types, 5 (AD, AR)	HT	B	EUR+	Novel	-	-	-	-	-
GATA5	D	20q13.33	0.01	Essential_hypertension	+	1.13818	1.25462e-06	Congenital heart defects, multiple types, 5 (AD, AR)	HT	B	EUR+	Novel	+	+	-	+	https://www.nature.com/articles/ncomms9835
GATA5	D	20q13.33	0.01	HT_All	+	1.13484	1.98592e-06	Congenital heart defects, multiple types, 5 (AD, AR)	HT	B	EUR+	Novel	+	+	-	+	https://www.nature.com/articles/ncomms9835
EI24	P+LP+VUS_H	11q24.2	singleton	BMI	+	3.67392	2.69687e-07	.	OB	B	EUR+	Novel	+	+	-	-	-
GATM	P+LP+VUS_H+D	15q21.1	0.001	eGFR	+	4.08535	1.64838e-11	Cerebral creatine deficiency syndrome 3 (AR); Fanconi renotubular syndrome 1 (AD)	CKD	B	EUR+	Known	.	.	.	.	.
EPS8L1	PVS1_VSS	19q13.42	0.01	Morbid_obesity	+	22.9595	1.07105e-06	.	OB	B	EUR+	Novel	-	-	-	-	.
GCK	P+LP	7p13	0.001	Type_2_diabetes	+	11.3048	2.89128e-58	Diabetes mellitus, noninsulin-dependent, late onset (AD); Diabetes mellitus, permanent neonatal 1 (AR); Hyperinsulinemic hypoglycemia, familial, 3 (AD); MODY, type II (AD)	DM	B	EUR	Known	.	.	.	.	.
GCK	P+LP	7p13	0.001	DM_All	+	10.8087	4.33262e-57	Diabetes mellitus, noninsulin-dependent, late onset (AD); Diabetes mellitus, permanent neonatal 1 (AR); Hyperinsulinemic hypoglycemia, familial, 3 (AD); MODY, type II (AD)	DM	B	EUR	Known	.	.	.	.	.
GCK	P+LP+VUS_H	7p13	0.01	HbA1c+Glucose	+	.	1.44371e-52	Diabetes mellitus, noninsulin-dependent, late onset (AD); Diabetes mellitus, permanent neonatal 1 (AR); Hyperinsulinemic hypoglycemia, familial, 3 (AD); MODY, type II (AD)	DM	F	EUR	Known	.	.	.	.	.
GCK	P	7p13	0.001	Apolipoprotein_B(-);Cholesterol(-);LDL(-)	-	Protective	.	Diabetes mellitus, noninsulin-dependent, late onset (AD); Diabetes mellitus, permanent neonatal 1 (AR); Hyperinsulinemic hypoglycemia, familial, 3 (AD); MODY, type II (AD)	DLP	B	EUR+	Known	.	.	.	.	.
GCKR	P+LP	2p23.3	0.01	Apolipoprotein_B(+);Triglycerides(+)	+	Atherogenic	.	[Fasting plasma glucose level QTL 5]	DLP	B	EUR+	Known	.	.	.	.	.
GATC	D	12q24.31	singleton	BMI	+	6.49218	2.19047e-07	Combined oxidative phosphorylation deficiency 42 (AR)	OB	M	EUR+	Novel	-	-	-	-	-
GIGYF1	PVS1_VS	7q22.1	0.01	HbA1c+Glucose	+	.	8.87869e-16	.	DM	B	EUR+	Known	.	.	.	.	.
GIGYF1	PVS1_VSS	7q22.1	0.001	Type_2_diabetes	+	3.76094	8.44799e-10	.	DM	B	EUR+	Known	.	.	.	.	.
GIGYF1	PVS1_VSS	7q22.1	0.001	DM_All	+	3.55631	3.20069e-09	.	DM	B	EUR+	Known	.	.	.	.	.
GIGYF1	P+LP	7q22.1	0.001	Apolipoprotein_B(-);Cholesterol(-);LDL(-)	-	Protective	.	.	DLP	B	EUR+	Known	.	.	.	.	.
GCDH	PVS1_VSS	19p13.13	singleton	BMI	+	5.10887	1.64624e-08	Glutaricaciduria, type I (AR)	OB	B	EUR+	Novel	-	-	-	-	-
GLTPD2	P+LP+VUS_H+D	17p13.2	0.001	Apolipoprotein_B(-);Cholesterol(-);LDL(-)	-	Protective	.	.	DLP	F	EUR+	Novel	+	+	-	-	-
GLYATL1	D	11q12.1	0.001	Hyperlipidemia	+	8.53734	4.12581e-08	.	DLP	F	EUR+	Novel	-	-	-	-	-
GFAP	PVS1_VS	17q21.31	singleton	BMI	+	7.05105	3.1656e-07	Alexander disease (AD)	OB	F	EUR	Novel	-	-	-	-	-
GIPR	P+LP+VUS_H+D	19q13.32	0.001	BMI	-	-0.516746	1.89235e-06	.	OB	B	EUR+	Known	.	.	.	.	.
GSC2	P+LP	22q11.21	singleton	HbA1c+Glucose	+	.	1.71035e-11	.	DM	F	EUR	Novel	-	-	-	-	-
GUCY1A1	P+LP+VUS_H	4q32.1	0.001	Essential_hypertension	+	1.85965	4.25734e-09	Moyamoya 6 with achalasia (AR)	HT	B	EUR+	Known	.	.	.	.	.
GUCY1A1	P+LP+VUS_H	4q32.1	0.001	HT_All	+	1.84715	5.01742e-09	Moyamoya 6 with achalasia (AR)	HT	B	EUR+	Known	.	.	.	.	.
HBB	PVS1_VSS	11p15.4	0.01	Apolipoprotein_B(-);Cholesterol(-);LDL(-)	-	Protective	.	{Malaria, resistance to} ; Delta-beta thalassemia (AD); Erythrocytosis, familial, 6 (AD); Heinz body anemia (AD); Hereditary persistence of fetal hemoglobin (AD); Methemoglobinemia, beta type (AD); Sickle cell disease (AR); Thalassemia-beta, dominant inclusion-body (AD); Thalassemia, beta	DLP	B	EUR+	Known	.	.	.	.	.
HBG2	P+LP+VUS_H+D	11p15.4	singleton	HbA1c+Glucose	+	.	1.06946e-07	Cyanosis, transient neonatal (AD); Fetal hemoglobin quantitative trait locus 1 (AD)	DM	M	EUR+	Novel	-	-	-	-	-
GNAZ	P+LP+VUS_H	22q11.22	0.001	BMI	+	2.62596	1.31169e-06	.	OB	B	EUR+	Novel	+	-	+	+	+
PKN2	P+LP	1p22.2	0.001	Chronic_kidney_disease	+	24.7335	1.99803e-08	.	CKD	F	EUR+	Novel	-	-	-	-	-
PKN2	P+LP	1p22.2	0.001	CKD_All	+	24.528	2.11279e-08	.	CKD	F	EUR+	Novel	-	-	-	-	-
GPR151	PVS1_S	5q32	0.01	BMI	-	-0.244382	8.42693e-08	.	OB	B	EUR+	Known	.	.	.	.	.
HECTD4	PVS1_VS	12q24.13	singleton	HbA1c+Glucose	+	.	3.35288e-11	Neurodevelopmental disorder with seizures, spasticity, and complete or partial agenesis of the corpus callosum (AR)	DM	F	EUR+	Novel	+	+	-	-	-
HCRTR2	P+LP+VUS_H+D	6p12.1	0.001	BMI	+	1.19973	8.17256e-07	.	OB	B	EUR+	Novel	+	+	-	-	-
HECTD4	P+LP	12q24.13	singleton	BMI	+	2.84096	1.64936e-10	Neurodevelopmental disorder with seizures, spasticity, and complete or partial agenesis of the corpus callosum (AR)	OB	B	EUR+	Novel	+	+	-	-	-
HMGA2	P+LP+VUS_H	12q14.3	0.001	Type_2_diabetes	+	10.8962	6.66933e-07	Silver-Russell syndrome 5 (AD)	DM	B	EUR+	Novel	+	+	-	-	-
HMGA2	P+LP+VUS_H	12q14.3	0.001	DM_All	+	10.2016	9.95846e-07	Silver-Russell syndrome 5 (AD)	DM	B	EUR+	Novel	+	+	-	-	-
HMGCR	P+LP	5q13.3	0.001	Apolipoprotein_B(-);LDL(-)	-	Protective	.	[Low density lipoprotein cholesterol level QTL 3] ; [Statins, response to] ; Muscular dystrophy, limb-girdle, autosomal recessive 28 (AR)	DLP	B	EUR+	Known	.	.	.	.	.
HMHB1	P+LP+VUS_H	5q31.3	0.01	HbA1c+Glucose	+	.	9.82461e-08	.	DM	F	EUR	Novel	-	-	-	-	-
HNF1A	P	12q24.31	0.01	HbA1c+Glucose	+	.	1.9743e-32	{Diabetes mellitus, insulin-dependent} (AR); {Diabetes mellitus, noninsulin-dependent, 2} (AD); Diabetes mellitus, insulin-dependent, 20 ; Hepatic adenoma, somatic ; MODY, type III (AD); Renal cell carcinoma	DM	F	EUR	Known	.	.	.	.	.
HNF1A	P	12q24.31	0.001	DM_All	+	15.6098	1.33003e-25	{Diabetes mellitus, insulin-dependent} (AR); {Diabetes mellitus, noninsulin-dependent, 2} (AD); Diabetes mellitus, insulin-dependent, 20 ; Hepatic adenoma, somatic ; MODY, type III (AD); Renal cell carcinoma	DM	B	EUR	Known	.	.	.	.	.
HNF1A	P	12q24.31	0.001	Type_2_diabetes	+	15.6441	1.18273e-23	{Diabetes mellitus, insulin-dependent} (AR); {Diabetes mellitus, noninsulin-dependent, 2} (AD); Diabetes mellitus, insulin-dependent, 20 ; Hepatic adenoma, somatic ; MODY, type III (AD); Renal cell carcinoma	DM	B	EUR	Known	.	.	.	.	.
HNF1A	PVS1_VSS	12q24.31	0.001	Type_1_diabetes_mellitus	+	118.872	7.48475e-09	{Diabetes mellitus, insulin-dependent} (AR); {Diabetes mellitus, noninsulin-dependent, 2} (AD); Diabetes mellitus, insulin-dependent, 20 ; Hepatic adenoma, somatic ; MODY, type III (AD); Renal cell carcinoma	DM	F	EUR	Known	.	.	.	.	.
HNF1A	PVS1_VSSM	12q24.31	0.001	Apolipoprotein_B(-);Cholesterol(-);LDL(-)	-	Protective	.	{Diabetes mellitus, insulin-dependent} (AR); {Diabetes mellitus, noninsulin-dependent, 2} (AD); Diabetes mellitus, insulin-dependent, 20 ; Hepatic adenoma, somatic ; MODY, type III (AD); Renal cell carcinoma	DLP	F	EUR	Novel	+	+	-	+	-
HNF4A	P+LP	20q13.12	0.001	DM_All	+	4.58934	6.61122e-21	{Diabetes mellitus, noninsulin-dependent} (AD); Fanconi renotubular syndrome 4, with maturity-onset diabetes of the young (AD); MODY, type I (AD)	DM	B	EUR+	Known	.	.	.	.	.
HNF4A	P+LP	20q13.12	0.001	Type_2_diabetes	+	4.53933	2.55e-20	{Diabetes mellitus, noninsulin-dependent} (AD); Fanconi renotubular syndrome 4, with maturity-onset diabetes of the young (AD); MODY, type I (AD)	DM	B	EUR+	Known	.	.	.	.	.
HNF4A	P+LP	20q13.12	0.01	HbA1c+Glucose	+	.	1.86693e-16	{Diabetes mellitus, noninsulin-dependent} (AD); Fanconi renotubular syndrome 4, with maturity-onset diabetes of the young (AD); MODY, type I (AD)	DM	B	EUR+	Known	.	.	.	.	.
HP1BP3	P+LP	1p36.12	0.001	Type_2_diabetes	+	8.48712	1.62241e-06	.	DM	B	EUR	Novel	-	-	-	-	-
HP1BP3	P+LP	1p36.12	0.001	DM_All	+	8.31525	1.86611e-06	.	DM	B	EUR	Novel	-	-	-	-	-
HRG	P+LP+VUS_H	3q27.3	0.001	Hyperlipidemia	+	5.25443	8.66272e-07	Thrombophilia 11 due to HRG deficiency (AD)	DLP	F	EUR+	Novel	+	+	-	-	-
HSD17B6	P+LP+VUS_H+D	12q13.3	singleton	HbA1c+Glucose	+	.	1.98305e-08	.	DM	F	EUR+	Novel	+	+	-	-	-
IFT140	P+LP+VUS_H	16p13.3	0.001	eGFR	-	-2.05035	2.21857e-08	{Polycystic kidney disease 9, susceptibility to} (AD); Cranioectodermal dysplasia 5 (AR); Retinitis pigmentosa 80 (AR); Short-rib thoracic dysplasia 9 with or without polydactyly (AR)	CKD	M	EUR+	Known	.	.	.	.	.
IGF1R	D	15q26.3	0.001	Type_2_diabetes	+	1.9995	4.17997e-07	Insulin-like growth factor I, resistance to (AD, AR)	DM	F	EUR+	Known	.	.	.	.	.
IGF1R	P+LP+VUS_H	15q26.3	0.001	DM_All	+	2.03197	7.76088e-07	Insulin-like growth factor I, resistance to (AD, AR)	DM	B	EUR+	Known	.	.	.	.	.
IL10	PVS1_VSSM	1q32.1	0.01	HbA1c+Glucose	+	.	8.34307e-10	{Graft-versus-host disease, protection against} ; {HIV-1, susceptibility to} ; {Rheumatoid arthritis, progression of}	DM	B	EUR	Novel	+	+	-	+	+
IMPDH1	P+LP	7q32.1	singleton	HbA1c+Glucose	+	.	6.10273e-10	Leber congenital amaurosis 11 (AD); Retinitis pigmentosa 10 (AD)	DM	F	EUR+	Novel	-	-	-	-	-
IRAK4	PVS1_VSS	12q12	singleton	HbA1c+Glucose	+	.	1.13758e-07	Immunodeficiency 67 (AR)	DM	M	EUR+	Novel	-	-	-	-	-
IRS2	P+LP+VUS_H	13q34	0.001	Type_2_diabetes	+	2.91597	1.96468e-07	{Diabetes mellitus, noninsulin-dependent} (AD)	DM	B	EUR+	Known	.	.	.	.	.
IRS2	P+LP+VUS_H	13q34	0.001	DM_All	+	2.76998	5.86256e-07	{Diabetes mellitus, noninsulin-dependent} (AD)	DM	B	EUR+	Known	.	.	.	.	.
JADE1	PVS1_S	4q28.2	0.01	HbA1c+Glucose	+	.	6.54012e-09	.	DM	B	EUR	Novel	-	-	-	-	-
JAK2	P+LP	9p24.1	0.001	Chronic_kidney_disease	+	2.02979	3.6386e-08	{Budd-Chiari syndrome, somatic} ; Erythrocytosis, somatic ; Leukemia, acute myeloid, somatic ; Myelofibrosis, somatic ; Polycythemia vera, somatic ; Thrombocythemia 3 (AD, SMu)	CKD	B	EUR+	Known	.	.	.	.	.
JAK2	P+LP	9p24.1	0.001	CKD_All	+	2.019	4.43885e-08	{Budd-Chiari syndrome, somatic} ; Erythrocytosis, somatic ; Leukemia, acute myeloid, somatic ; Myelofibrosis, somatic ; Polycythemia vera, somatic ; Thrombocythemia 3 (AD, SMu)	CKD	B	EUR+	Known	.	.	.	.	.
SLC22A2	P+LP+VUS_H+D	6q25.3	0.01	eGFR	-	-4.75048	7.35463e-99	.	CKD	B	EUR+	Novel	+	+	-	-	-
ASXL1	P+LP+VUS_H+D	20q11.21	0.001	Apolipoprotein_B(-);Cholesterol(-);LDL(-)	-	Protective	.	Bohring-Opitz syndrome (AD); Myelodysplastic syndrome, somatic	DLP	B	EUR+	CHIP	.	.	.	.	.
KAT6A	PVS1_VSSM	8p11.21	singleton	HbA1c+Glucose	+	.	1.27032e-11	Arboleda-Tham syndrome (AD)	DM	B	EUR+	Novel	+	+	-	-	-
HELZ	P+LP+VUS_H+D	17q24.2	0.01	BMI	+	0.500051	5.10664e-07	.	OB	B	EUR+	Novel	-	-	-	-	-
KCNN4	P+LP+VUS_H+D	19q13.31	0.01	Pure_hypercholesterolemia	+	1.37584	4.46567e-07	Dehydrated hereditary stomatocytosis 2 (AD)	DLP	B	EUR+	Novel	+	+ (HDL level)	-	-	https://pubmed.ncbi.nlm.nih.gov/18688283/
HIF1AN	P+LP+VUS_H	10q24.31	0.001	BMI	+	3.7883	7.40016e-08	.	OB	F	EUR+	Novel	+	+	-	-	-
LCAT	P	16q22.1	0.001	Apolipoprotein_A(-);HDL(-)	+	Atherogenic	.	Fish-eye disease (AR); Norum disease (AR)	DLP	M	EUR+	Known	.	.	.	.	.
LDLR	P+LP+VUS_H+D	19p13.2	0.001	DLP_All	+	2.8163	1.47521e-81	Hypercholesterolemia, familial, 1 (AD, AR); LDL cholesterol level QTL2 (AD, AR)	DLP	B	EUR+	Known	.	.	.	.	.
LDLR	P+LP+VUS_H+D	19p13.2	0.001	Pure_hypercholesterolemia	+	2.83876	6.07951e-80	Hypercholesterolemia, familial, 1 (AD, AR); LDL cholesterol level QTL2 (AD, AR)	DLP	B	EUR+	Known	.	.	.	.	.
LDLR	P	19p13.2	0.001	Hyperlipidemia	+	3.53582	3.54952e-22	Hypercholesterolemia, familial, 1 (AD, AR); LDL cholesterol level QTL2 (AD, AR)	DLP	B	EUR+	Known	.	.	.	.	.
LDLR	P	19p13.2	0.001	Apolipoprotein_A(-);Apolipoprotein_B(+);Cholesterol(+);LDL(+)	+	Atherogenic	.	Hypercholesterolemia, familial, 1 (AD, AR); LDL cholesterol level QTL2 (AD, AR)	DLP	B	EUR+	Known	.	.	.	.	.
LIPC	P+LP	15q21.3	0.001	Apolipoprotein_A(+);HDL(+)	-	Protective	.	[High density lipoprotein cholesterol level QTL 12] ; {Diabetes mellitus, noninsulin-dependent} (AD); Hepatic lipase deficiency (AR)	DLP	M	EUR+	Known	.	.	.	.	.
LIPG	P+LP	18q21.1	0.001	Apolipoprotein_A(+);HDL(+)	-	Protective	.	.	DLP	M	EUR+	Known	.	.	.	.	.
KCNMA1	P+LP+VUS_H	10q22.3	singleton	BMI	+	2.94585	2.36986e-07	{Epilepsy, idiopathic generalized, susceptibility to, 16} (AD); Cerebellar atrophy, developmental delay, and seizures (AR); Liang-Wang syndrome (AD); Paroxysmal nonkinesigenic dyskinesia, 3, with or without generalized epilepsy (AD)	OB	F	EUR+	Novel	+	+	-	-	-
LPL	P+LP	8p21.3	0.001	DLP_All	+	1.62107	6.26647e-10	[High density lipoprotein cholesterol level QTL 11] (AR); Combined hyperlipidemia, familial (AD); Lipoprotein lipase deficiency (AR)	DLP	B	EUR+	Known	.	.	.	.	.
LPL	P+LP	8p21.3	0.001	Pure_hypercholesterolemia	+	1.47664	1.53015e-06	[High density lipoprotein cholesterol level QTL 11] (AR); Combined hyperlipidemia, familial (AD); Lipoprotein lipase deficiency (AR)	DLP	B	EUR+	Known	.	.	.	.	.
LPL	P+LP+VUS_H	8p21.3	0.001	Apolipoprotein_A(-);Apolipoprotein_B(+);HDL(-);Triglycerides(+)	+	Atherogenic	.	[High density lipoprotein cholesterol level QTL 11] (AR); Combined hyperlipidemia, familial (AD); Lipoprotein lipase deficiency (AR)	DLP	F	EUR+	Known	.	.	.	.	.
LRP10	PVS1_S	14q11.2	0.01	HbA1c+Glucose	+	.	2.02937e-06	.	DM	F	EUR+	Novel	-	-	-	-	-
LRP2	P+LP+VUS_H	2q31.1	0.001	eGFR	+	5.21873	1.23753e-47	Donnai-Barrow syndrome (AR)	CKD	B	EUR+	Dominant_presentation_of_the_recessive_disease	.	.	.	.	.
MAP3K15	P+LP+VUS_H+D	Xp22.12	0.01	HbA1c+Glucose	-	.	6.81512e-12	.	DM	B	EUR+	Known	.	.	.	.	.
MAP3K15	P+LP+VUS_H+D	Xp22.12	0.01	DM_All	-	0.885632	2.88863e-07	.	DM	B	EUR+	Known	.	.	.	.	.
MAP3K15	P+LP+VUS_H+D	Xp22.12	0.01	Type_2_diabetes	-	0.884074	3.05166e-07	.	DM	B	EUR+	Known	.	.	.	.	.
KIF2C	P+LP+VUS_H	1p34.1	singleton	BMI	+	3.37844	2.3638e-06	.	OB	F	EUR+	Novel	-	-	-	-	-
MGME1	P	20p11.23	0.01	HbA1c+Glucose	+	.	5.42883e-08	Mitochondrial DNA depletion syndrome 11 (AR)	DM	F	EUR+	Novel	+	-	-	+	+
LONRF3	PVS1_M	Xq24	0.001	BMI	+	5.0091	1.40325e-06	.	OB	B	EUR+	Novel	+	-	{Obesity, susceptibility to, BMIQ11}	-	-
MOSPD3	PVS1_VSS	7q22.1	singleton	HbA1c+Glucose	+	.	1.72134e-07	.	DM	M	EUR+	Novel	-	-	-	-	-
MRFAP1	P+LP+VUS_H+D	4p16.1	0.01	HbA1c+Glucose	+	.	4.05851e-08	.	DM	F	EUR+	Novel	-	-	-	-	-
MRPL11	P+LP	11q13.2	0.01	HbA1c+Glucose	+	.	6.59069e-07	.	DM	F	EUR	Novel	-	-	-	-	-
MYCBP2	P+LP+VUS_H	13q22.3	singleton	Type_2_diabetes	+	3.07411	3.6897e-09	.	DM	B	EUR+	Novel	(binary+QT)	-	-	-	-
MYCBP2	P+LP+VUS_H	13q22.3	singleton	DM_All	+	2.96638	1.03982e-08	.	DM	B	EUR+	Novel	(binary+QT)	-	-	-	-
MYCBP2	P+LP+VUS_H	13q22.3	singleton	HbA1c+Glucose	+	.	1.20353e-07	.	DM	B	EUR+	Novel	(binary+QT)	-	-	-	-
BHLHA9	D	17p13.3	0.001	Hyperlipidemia	+	3.95493	1.87931e-09	?Camptosynpolydactyly, complex (AR); Syndactyly, mesoaxial synostotic, with phalangeal reduction (AR)	DLP	B	EUR+	Novel	-	-	-	-	.
NEUROD1	PVS1_S	2q31.3	0.001	DM_All	+	6.33344	3.957e-07	{Type 2 diabetes mellitus, susceptibility to} (AD); Maturity-onset diabetes of the young 6	DM	B	EUR	Known	.	.	.	.	.
NEUROD1	PVS1_S	2q31.3	0.001	Type_2_diabetes	+	5.93512	2.15459e-06	{Type 2 diabetes mellitus, susceptibility to} (AD); Maturity-onset diabetes of the young 6	DM	B	EUR+	Known	.	.	.	.	.
JAK2	D	9p24.1	0.01	Apolipoprotein_B(-);Cholesterol(-);LDL(-)	-	Protective	.	{Budd-Chiari syndrome, somatic} ; Erythrocytosis, somatic ; Leukemia, acute myeloid, somatic ; Myelofibrosis, somatic ; Polycythemia vera, somatic ; Thrombocythemia 3 (AD, SMu)	DLP	B	EUR+	Somatic	.	.	.	.	.
NHERF2	P+LP+VUS_H+D	16p13.3	0.01	MAP	-	-1.06299	1.38536e-15	.	HT	B	EUR+	Known	.	.	.	.	.
NHERF2	P+LP+VUS_H+D	16p13.3	0.01	DBP	-	-1.02378	6.32458e-15	.	HT	B	EUR+	Known	.	.	.	.	.
NHERF2	P+LP+VUS_H+D	16p13.3	0.01	SBP	-	-1.65752	1.41517e-13	.	HT	B	EUR+	Known	.	.	.	.	.
NHERF2	P+LP+VUS_H+D	16p13.3	0.01	HT_All	-	0.873074	7.08752e-08	.	HT	B	EUR+	Known	.	.	.	.	.
NHERF2	P+LP+VUS_H+D	16p13.3	0.01	Essential_hypertension	-	0.876029	1.64842e-07	.	HT	B	EUR+	Known	.	.	.	.	.
NKX2-1	D	14q13.3	singleton	HbA1c+Glucose	+	.	1.32479e-07	{Thyroid cancer, nonmedullary, 1} (AD); Chorea, hereditary benign (AD); Choreoathetosis, hypothyroidism, and neonatal respiratory distress (AD)	DM	F	EUR+	Novel	+	+	-	-	-
NOS3	P+LP+VUS_H	7q36.1	0.001	Essential_hypertension	+	1.66797	6.16193e-13	.	HT	B	EUR+	Known	.	.	.	.	.
NOS3	P+LP+VUS_H	7q36.1	0.001	HT_All	+	1.66477	6.42571e-13	.	HT	B	EUR+	Known	.	.	.	.	.
NOS3	PVS1_VSSM	7q36.1	0.001	DBP	+	2.813	3.19145e-08	.	HT	B	EUR+	Known	.	.	.	.	.
NOS3	PVS1_VSSM	7q36.1	0.001	MAP	+	2.71148	2.00092e-07	.	HT	B	EUR+	Known	.	.	.	.	.
NPC1L1	P+LP+VUS_H+D	7p13	0.01	Hyperlipidemia	-	0.726251	4.20289e-07	[Ezetimibe, nonresponse to] ; [Low density lipoprotein cholesterol level QTL 7]	DLP	B	EUR+	Known	.	.	.	.	.
NPC1L1	P+LP+VUS_H+D	7p13	0.01	DLP_All	-	0.864369	5.28776e-07	[Ezetimibe, nonresponse to] ; [Low density lipoprotein cholesterol level QTL 7]	DLP	B	EUR+	Known	.	.	.	.	.
NPC1L1	P+LP+VUS_H	7p13	0.001	Apolipoprotein_B(-);Cholesterol(-);LDL(-)	-	Protective	.	[Ezetimibe, nonresponse to] ; [Low density lipoprotein cholesterol level QTL 7]	DLP	F	EUR+	Known	.	.	.	.	.
NPR1	P+LP+VUS_H	1q21.3	0.01	HT_All	+	1.90216	1.45578e-10	.	HT	F	EUR+	Known	.	.	.	.	.
NPR1	P+LP+VUS_H	1q21.3	0.01	Essential_hypertension	+	1.59201	2.40636e-10	.	HT	B	EUR+	Known	.	.	.	.	.
NPR1	P+LP+VUS_H	1q21.3	0.01	SBP	+	3.90589	1.50283e-08	.	HT	B	EUR+	Known	.	.	.	.	.
NPR1	P+LP+VUS_H	1q21.3	0.01	MAP	+	2.16868	1.12997e-07	.	HT	B	EUR+	Known	.	.	.	.	.
NR1H3	P+LP	11p11.2	0.001	Apolipoprotein_A(+);HDL(+)	-	Protective	.	.	DLP	M	EUR+	Known	.	.	.	.	.
NR1H4	D	12q23.1	0.001	Cholesterol(-);LDL(-)	-	Protective	.	Cholestasis, progressive familial intrahepatic, 5 (AR)	DLP	B	EUR+	Known	.	.	.	.	.
MC4R	P+LP+VUS_H	18q21.32	0.001	BMI	+	1.67475	8.46025e-42	{Obesity, resistance to (BMIQ20)} (AD, AR); Obesity (BMIQ20) (AD, AR)	OB	B	EUR+	Known	.	.	.	.	.
OBSCN	P+LP+VUS_H	1q42.13	0.01	eGFR	-	-0.937547	4.44434e-15	{Rhabdomyolysis, susceptibility to, 1} (AR)	CKD	B	EUR+	Dominant_presentation_of_the_recessive_disease	.	.	.	.	.
OFD1	P+LP	Xp22.2	singleton	eGFR	-	-27.5681	1.56067e-10	?Retinitis pigmentosa 23 (XLR); Joubert syndrome 10 (XLR); Orofaciodigital syndrome I (XLD); Simpson-Golabi-Behmel syndrome, type 2 (XLR)	CKD	B	EUR+	Known	.	.	.	.	.
OR10Q1	PVS1_M	11q12.1	0.01	HbA1c+Glucose	+	.	4.92801e-12	.	DM	M	EUR+	Novel	-	-	-	-	-
SLC22A2	PVS1_VS	6q25.3	0.01	Chronic_kidney_disease	+	1.77627	4.481e-08	.	CKD	B	EUR+	Novel	+	+	-	-	-
JAK2	P+LP+VUS_H+D	9p24.1	0.01	Apolipoprotein_A(-);HDL(-)	+	Atherogenic	.	{Budd-Chiari syndrome, somatic} ; Erythrocytosis, somatic ; Leukemia, acute myeloid, somatic ; Myelofibrosis, somatic ; Polycythemia vera, somatic ; Thrombocythemia 3 (AD, SMu)	DLP	B	EUR+	Somatic	.	.	.	.	.
NFIC	P+LP+VUS_H	19p13.3	0.01	Apolipoprotein_A(-);HDL(-)	+	Atherogenic	.	.	DLP	B	EUR+	Novel	+	+	-	-	.
PAM	D	5q21.1	0.01	Type_2_diabetes	+	1.30401	4.71941e-16	.	DM	B	EUR+	Known	.	.	.	.	.
PAM	D	5q21.1	0.01	DM_All	+	1.29311	1.84719e-15	.	DM	B	EUR+	Known	.	.	.	.	.
MIB1	P+LP	18q11.2	0.001	BMI	+	0.90009	1.24685e-06	Left ventricular noncompaction 7 (AD)	OB	F	EUR+	Novel	-	-	-	-	-
MYH2	D	17p13.1	0.01	Morbid_obesity	+	3.06328	2.0676e-06	Congenital myopathy 6 with ophthalmoplegia (AD, AR)	OB	B	EUR+	Novel	-	-	-	-	.
PCSK9	P+LP+VUS_H+D	1p32.3	0.01	DLP_All	-	0.645124	8.1556e-22	{Low density lipoprotein cholesterol level QTL 1} (AD); Hypercholesterolemia, familial, 3 (AD)	DLP	B	EUR+	Known	.	.	.	.	.
PCSK9	P+LP+VUS_H+D	1p32.3	0.01	Pure_hypercholesterolemia	-	0.657516	3.40662e-19	{Low density lipoprotein cholesterol level QTL 1} (AD); Hypercholesterolemia, familial, 3 (AD)	DLP	B	EUR+	Known	.	.	.	.	.
PCSK9	P+LP+VUS_H+D	1p32.3	0.01	Hyperlipidemia	-	0.543852	1.16394e-09	{Low density lipoprotein cholesterol level QTL 1} (AD); Hypercholesterolemia, familial, 3 (AD)	DLP	B	EUR+	Known	.	.	.	.	.
PCSK9	P+LP+VUS_H+D	1p32.3	0.01	Apolipoprotein_A(+);Apolipoprotein_B(-);Cholesterol(-);LDL(-)	-	Protective	.	{Low density lipoprotein cholesterol level QTL 1} (AD); Hypercholesterolemia, familial, 3 (AD)	DLP	M	EUR+	Known	.	.	.	.	.
PDE3B	P+LP+VUS_H	11p15.2	0.01	Apolipoprotein_A(+);Apolipoprotein_B(-);HDL(+);LDL(-);Triglycerides(-)	-	Protective	.	.	DLP	F	EUR+	Known	.	.	.	.	.
PDX1	P+LP+VUS_H	13q12.2	0.001	DM_All	+	5.78954	5.37111e-07	{Diabetes mellitus, type II, susceptibility to} (AD); MODY, type IV ; Pancreatic agenesis 1 (AR)	DM	B	EUR+	Known	.	.	.	.	.
PDX1	P+LP+VUS_H	13q12.2	0.001	Type_1_diabetes_mellitus	+	42.0273	5.89256e-07	{Diabetes mellitus, type II, susceptibility to} (AD); MODY, type IV ; Pancreatic agenesis 1 (AR)	DM	M	EUR+	Known	.	.	.	.	.
PDX1	P+LP+VUS_H	13q12.2	0.001	Type_2_diabetes	+	5.34774	2.0529e-06	{Diabetes mellitus, type II, susceptibility to} (AD); MODY, type IV ; Pancreatic agenesis 1 (AR)	DM	B	EUR+	Known	.	.	.	.	.
PI4KA	P+LP	22q11.21	0.001	HT_All	-	0.684255	3.68755e-07	Gastrointestinal defects and immunodeficiency syndrome 2 (AR); Polymicrogyria, perisylvian, with cerebellar hypoplasia and arthrogryposis (AR); Spastic paraplegia 84, autosomal recessive (AR)	HT	B	EUR+	Novel	-	-	-	-	-
PI4KA	P+LP	22q11.21	0.001	Essential_hypertension	-	0.685943	4.65598e-07	Gastrointestinal defects and immunodeficiency syndrome 2 (AR); Polymicrogyria, perisylvian, with cerebellar hypoplasia and arthrogryposis (AR); Spastic paraplegia 84, autosomal recessive (AR)	HT	B	EUR+	Novel	-	-	-	-	-
PKD1	PVS1_VS	16p13.3	singleton	eGFR	-	-33.8593	3.96062e-166	Polycystic kidney disease 1 (AD)	CKD	B	EUR+	Known	.	.	.	.	.
PKD1	P+LP+VUS_H	16p13.3	0.001	End_stage_renal_disease_CDK_stage_5	+	117.408	5.99318e-102	Polycystic kidney disease 1 (AD)	CKD	B	EUR+	Known	.	.	.	.	.
PKD1	P+LP	16p13.3	singleton	CKD_All	+	36.1102	7.48712e-89	Polycystic kidney disease 1 (AD)	CKD	B	EUR+	Known	.	.	.	.	.
PKD1	P+LP	16p13.3	singleton	Chronic_kidney_disease	+	27.0733	5.57691e-66	Polycystic kidney disease 1 (AD)	CKD	B	EUR+	Known	.	.	.	.	.
PKD1	P+LP+VUS_H	16p13.3	0.001	Hypertension	+	13.9164	3.28953e-32	Polycystic kidney disease 1 (AD)	HT	B	EUR+	Known	.	.	.	.	.
PKD1	PVS1_VS	16p13.3	singleton	Essential_hypertension	+	6.6155	2.17185e-22	Polycystic kidney disease 1 (AD)	HT	B	EUR+	Known	.	.	.	.	.
PKD1	PVS1_VS	16p13.3	singleton	HT_All	+	6.53557	6.1593e-22	Polycystic kidney disease 1 (AD)	HT	B	EUR+	Known	.	.	.	.	.
PKD2	P+LP	4q22.1	0.001	eGFR	-	-19.0622	1.01507e-37	Polycystic kidney disease 2 (AD)	CKD	B	EUR	Known	.	.	.	.	.
PKD2	P+LP	4q22.1	0.001	CKD_All	+	19.0939	2.06715e-24	Polycystic kidney disease 2 (AD)	CKD	B	EUR+	Known	.	.	.	.	.
PKD2	P+LP	4q22.1	0.001	Chronic_kidney_disease	+	17.0733	2.07161e-22	Polycystic kidney disease 2 (AD)	CKD	B	EUR+	Known	.	.	.	.	.
PKD2	PVS1_VSSM	4q22.1	0.001	End_stage_renal_disease_CDK_stage_5	+	149.553	8.79159e-16	Polycystic kidney disease 2 (AD)	CKD	B	EUR+	Known	.	.	.	.	.
PKD2	P+LP+VUS_H	4q22.1	0.001	HT_All	+	3.5128	4.49376e-09	Polycystic kidney disease 2 (AD)	HT	B	EUR+	Known	.	.	.	.	.
PKD2	P+LP+VUS_H	4q22.1	0.001	Essential_hypertension	+	3.42351	1.00322e-08	Polycystic kidney disease 2 (AD)	HT	B	EUR+	Known	.	.	.	.	.
PKHD1	P+LP+VUS_H+D	6p12.2	0.01	eGFR	+	0.950911	1.56479e-13	Polycystic kidney disease 4, with or without hepatic disease (AR)	CKD	B	EUR+	Known	.	.	.	.	.
SLC22A2	PVS1_VS	6q25.3	0.01	CKD_All	+	1.75671	8.25315e-08	.	CKD	B	EUR+	Novel	+	+	-	-	-
SLC22A7	D	6p21.1	0.001	Chronic_kidney_disease	+	1.62805	4.59953e-07	.	CKD	B	EUR+	Novel	+	+	-	-	.
PLA2G12A	P+LP+VUS_H+D	4q25	0.01	Apolipoprotein_A(-);HDL(-);LDL(+);Triglycerides(+)	+	Atherogenic	.	.	DLP	F	EUR+	Known	.	.	.	.	.
PLIN1	P+LP+VUS_H	15q26.1	0.01	Apolipoprotein_A(+);Apolipoprotein_B(-);HDL(+);Triglycerides(-)	-	Protective	.	Lipodystrophy, familial partial, type 4 (AD)	DLP	B	EUR+	Known	.	.	.	.	.
POGK	P+LP+VUS_H+D	1q24.1	0.001	Essential_hypertension	+	2.12805	7.62178e-07	.	HT	F	EUR+	Novel	-	-	-	-	-
POGK	P+LP+VUS_H+D	1q24.1	0.001	HT_All	+	2.06955	1.61565e-06	.	HT	F	EUR+	Novel	-	-	-	-	-
NTRK2	PVS1_VS	9q21.33	0.001	BMI	+	12.6356	1.15475e-09	Developmental and epileptic encephalopathy 58 (AD); Obesity, hyperphagia, and developmental delay (AD)	OB	B	EUR+	Known	.	.	.	.	.
PPARG	P+LP	3p25.2	0.001	HDL(-);Triglycerides(+)	+	Atherogenic	.	{Diabetes, type 2} (AD); Insulin resistance, severe, digenic (AD); Lipodystrophy, familial partial, type 3 (AD); Obesity, severe (AD, AR, Mu)	DLP	F	EUR+	Known	.	.	.	.	.
PRSS53	P+LP	16p11.2	singleton	HbA1c+Glucose	+	.	5.82849e-11	.	DM	F	EUR+	Novel	-	-	-	-	-
PSG11	PVS1_S	19q13.31	singleton	Type_2_diabetes	+	13.5915	2.55305e-06	.	DM	M	EUR+	Novel	+	-	-	+	+
PTBP2	PVS1_VSSM	1p21.3	0.001	Pure_hypercholesterolemia	+	13.049	9.59819e-07	.	DLP	B	EUR+	Novel	-	-	-	-	-
PCSK1	PVS1_VSSM	5q15	0.001	BMI	+	1.84209	3.95452e-08	{Obesity, susceptibility to, BMIQ12} ; Endocrinopathy due to proprotein convertase 1/3 deficiency (AR)	OB	B	EUR	Known	.	.	.	.	.
PTEN	PVS1_VS	10q23.31	singleton	HbA1c+Glucose	+	.	2.02293e-14	{Glioma susceptibility 2} (AD); {Meningioma} (AD); Cowden syndrome 1 (AD); Lhermitte-Duclos disease (AD); Macrocephaly/autism syndrome (AD); Prostate cancer, somatic	DM	F	EUR	Known	.	.	.	.	.
PCSK2	P+LP+VUS_H	20p12.1	0.001	BMI	+	2.08554	6.67453e-07	.	OB	B	EUR+	Novel	+	+	-	-	-
POGZ	P+LP+VUS_H+D	1q21.3	0.001	BMI	+	1.3161	6.84835e-08	White-Sutton syndrome (AD)	OB	B	EUR+	Known	.	.	.	.	.
PTEN	P+LP	10q23.31	0.001	BMI	+	3.36482	1.68015e-08	{Glioma susceptibility 2} (AD); {Meningioma} (AD); Cowden syndrome 1 (AD); Lhermitte-Duclos disease (AD); Macrocephaly/autism syndrome (AD); Prostate cancer, somatic	OB	B	EUR+	Known	.	.	.	.	.
PTOV1	P+LP+VUS_H+D	19q13.33	0.01	BMI	+	1.79293	7.95576e-10	.	OB	B	EUR+	Known	.	.	.	.	.
RAPGEF2	PVS1_M	4q32.1	singleton	HbA1c+Glucose	+	.	2.83858e-07	?Epilepsy, familial adult myoclonic, 7 (AD)	DM	B	EUR	Novel	-	-	-	-	-
PTPRG	PVS1_VSSM	3p14.2	singleton	BMI	+	3.13079	1.38813e-08	.	OB	F	EUR+	Known	.	.	.	.	.
RB1CC1	PVS1_VS	8q11.23	singleton	HbA1c+Glucose	+	.	3.60931e-08	Breast cancer, somatic	DM	F	EUR+	Novel	-	-	-	-	-
RBAK	P+LP	7p22.1	0.01	HbA1c+Glucose	+	.	4.31764e-08	.	DM	B	EUR	Novel	-	-	-	-	-
RBM12	PVS1_VSSMP	20q11.22	0.001	Type_2_diabetes	+	10.5034	7.43419e-07	{Schizophrenia 19, susceptibility to} (AD)	DM	F	EUR	Novel	-	-	-	-	-
RBM12	PVS1_VSSMP	20q11.22	0.001	DM_all	+	9.53221	1.69578e-06	{Schizophrenia 19, susceptibility to} (AD)	DM	B	EUR	Novel	-	-	-	-	-
RAI1	PVS1_VS	17p11.2	singleton	BMI	+	9.72801	7.42022e-07	Smith-Magenis syndrome (AD, IC)	OB	F	EUR	Known	.	.	.	.	.
RGL3	P+LP+VUS_H+D	19p13.2	0.01	MAP	-	-0.81799	1.81771e-07	.	HT	B	EUR+	Known	.	.	.	.	.
RGL3	P+LP+VUS_H+D	19p13.2	0.01	SBP	-	-1.34147	4.14719e-07	.	HT	B	EUR+	Known	.	.	.	.	.
RGL3	P+LP+VUS_H+D	19p13.2	0.01	DBP	-	-0.742492	1.58716e-06	.	HT	B	EUR+	Known	.	.	.	.	.
RMND1	PVS1_P	6q25.1	singleton	HbA1c+Glucose	+	.	2.82336e-09	Combined oxidative phosphorylation deficiency 11 (AR)	DM	B	EUR+	Novel	-	-	-	-	-
RPS17	P+LP+VUS_H	15q25.2	singleton	HbA1c+Glucose	+	.	5.48929e-15	Diamond-Blackfan anemia 4 (AD)	DM	F	EUR	Novel	-	-	-	-	-
RRBP1	P+LP	20p12.1	singleton	Apolipoprotein_B(-);Cholesterol(-);LDL(-)	-	Protective	.	.	DLP	M	EUR+	Known	.	.	.	.	.
ZNF496	D	1q44	0.001	DLP_All	+	2.21414	1.1834e-06	.	DLP	B	EUR+	Novel	-	-	-	-	.
RAP2B	P+LP+VUS_H	3q25.2	0.001	BMI	+	3.14162	8.20106e-07	.	OB	B	EUR+	Novel	-	-	-	-	-
TLX1	P+LP+VUS_H+D	10q24.31	singleton	Type_2_diabetes	+	5.29461	2.46781e-06	.	DM	M	EUR+	Novel	-	-	-	-	.
RB1CC1	PVS1_VS	8q11.23	singleton	BMI	+	6.87879	9.50039e-11	Breast cancer, somatic	OB	F	EUR+	Novel	+	+ (leptin)	-	-	-
REEP4	P+LP	8p21.3	singleton	Obesity	+	21.75	3.86006e-07	.	OB	F	EUR+	Novel	-	-	-	-	-
SERPINB6	PVS1_S	6p25.2	0.01	HbA1c+Glucose	+	.	1.47601e-08	?Deafness, autosomal recessive 91 (AR)	DM	F	EUR+	Novel	-	-	-	-	-
SH2B3	D	12q24.12	0.01	HDL(-);Triglycerides(+)	+	Atherogenic	.	Erythrocytosis, somatic ; Myelofibrosis, somatic ; Thrombocythemia, somatic	DLP	F	EUR+	Known	.	.	.	.	.
SIN3A	PVS1_VS	15q24.2	0.01	HbA1c+Glucose	+	.	5.80201e-10	Witteveen-Kolk syndrome (AD)	DM	B	EUR	Novel	+	+	-	-	-
SIPA1	P+LP+VUS_H+D	11q13.1	0.01	Essential_hypertension	-	0.798151	3.70511e-10	.	HT	B	EUR+	Novel	+	+	-	-	-
SIPA1	P+LP+VUS_H+D	11q13.1	0.01	HT_All	-	0.802913	8.87663e-10	.	HT	B	EUR+	Novel	+	+	-	-	-
RUVBL2	D	19q13.33	singleton	Obesity	+	5.50074	1.56449e-06	.	OB	F	EUR+	Novel	+	-	-	+	https://www.nature.com/articles/s41467-024-53258-6
SCML4	D	6q21	singleton	BMI	+	4.39149	2.42158e-06	.	OB	F	EUR+	Novel	-	-	-	-	-
SLC16A4	PVS1_VSSM	1p13.3	0.01	Type_1_diabetes_mellitus	+	6.22586	1.67351e-06	.	DM	F	EUR+	Novel	-	-	-	-	-
SLC22A7	D	6p21.1	0.001	CKD_All	+	1.6083	8.00092e-07	.	CKD	B	EUR+	Novel	+	+	-	-	.
USP48	PVS1_VSSMP	1p36.12	singleton	Chronic_kidney_disease	+	7.68649	6.35848e-07	Deafness, autosomal dominant 85 (AD)	CKD	B	EUR+	Novel	-	-	-	-	.
USP48	PVS1_VSSMP	1p36.12	singleton	CKD_All	+	7.6645	6.57992e-07	Deafness, autosomal dominant 85 (AD)	CKD	B	EUR+	Novel	-	-	-	-	.
SLC22A7	P+LP+VUS_H+D	6p21.1	0.001	eGFR	-	-3.94471	7.7142e-42	.	CKD	B	EUR+	Novel	+	+	-	-	.
SCYGR5	D	2q36.3	0.001	PDFF	+	0.0485383	1.6343e-06	.	FLD	B	EUR+	Novel	-	-	-	-	.
ABAT	PVS1_VSSMP	16p13.2	0.001	DBP	-	-3.77082	2.59815e-06	GABA-transaminase deficiency (AR)	HT	B	EUR+	Novel	+ (check comment)	-	-	-	https://link.springer.com/article/10.1007/BF00165734?
SLC34A1	P+LP+VUS_H+D	5q35.3	0.001	eGFR	-	-1.86764	3.945e-14	?Fanconi renotubular syndrome 2 (AR); Hypercalcemia, infantile, 2 (AR); Nephrolithiasis/osteoporosis, hypophosphatemic, 1 (AD)	CKD	B	EUR+	Known	.	.	.	.	.
SLC34A3	P+LP+VUS_H	9q34.3	0.001	eGFR	-	-3.41843	1.77229e-59	Hypophosphatemic rickets with hypercalciuria (AR)	CKD	B	EUR+	Known	.	.	.	.	.
SLC4A1	PVS1_VS	17q21.31	0.001	Apolipoprotein_B(-);Cholesterol(-);LDL(-)	-	Protective	.	[Blood group, Diego] ; [Blood group, Froese] ; [Blood group, Swann] ; [Blood group, Waldner] ; [Blood group, Wright] ; {Malaria, resistance to} ; Cryohydrocytosis (AD); Distal renal tubular acidosis 1 (AD); Distal renal tubular acidosis 4 with hemolytic anemia (AR); Ovalocytosis, SA type (AD); Spherocytosis, type 4 (AD)	DLP	M	EUR+	Novel	+	+	-	-	-
SLC7A9	P+LP+VUS_H+D	19q13.11	0.01	eGFR	+	1.25633	1.303e-23	Cystinuria (AD, AR)	CKD	B	EUR+	Known	.	.	.	.	.
SEMA6A	PVS1_VS	5q23.1	0.001	BMI	+	3.14066	7.15124e-09	.	OB	B	EUR	Novel	-	-	-	-	-
SLTM	PVS1_VS	15q22.1	singleton	Type_2_diabetes	+	5.82101	5.30364e-07	.	DM	B	EUR+	Known	.	.	.	.	.
SLTM	PVS1_VS	15q22.1	0.001	DM_All	+	4.22275	6.21151e-07	.	DM	B	EUR+	Known	.	.	.	.	.
SLTM	PVS1_VS	15q22.1	0.001	BMI	+	3.81583	3.45787e-15	.	OB	B	EUR+	Known	.	.	.	.	.
SMAD6	P+LP+VUS_H+D	15q22.31	0.001	SBP	+	3.56279	9.42806e-11	{Craniosynostosis 7, susceptibility to} (AD); {Radioulnar synostosis, nonsyndromic} (AD); Aortic valve disease 2 (AD)	HT	B	EUR+	Complication_of_primary_finding	.	.	.	.	.
SMAD6	P+LP+VUS_H+D	15q22.31	0.001	MAP	+	2.00037	9.31929e-10	{Craniosynostosis 7, susceptibility to} (AD); {Radioulnar synostosis, nonsyndromic} (AD); Aortic valve disease 2 (AD)	HT	B	EUR+	Complication_of_primary_finding	.	.	.	.	.
SMAD6	P+LP+VUS_H+D	15q22.31	0.001	DBP	+	1.59546	6.69931e-07	{Craniosynostosis 7, susceptibility to} (AD); {Radioulnar synostosis, nonsyndromic} (AD); Aortic valve disease 2 (AD)	HT	B	EUR+	Complication_of_primary_finding	.	.	.	.	.
SMARCA4	PVS1_M	19p13.2	0.01	Apolipoprotein_B(+);LDL(+)	+	Atherogenic	.	?Otosclerosis 12 (AD); {Rhabdoid tumor predisposition syndrome 2} (AD); Coffin-Siris syndrome 4 (AD)	DLP	B	EUR+	Novel	+	+	-	-	-
SMG1	P+LP	16p12.3	0.01	HbA1c+Glucose	+	.	1.41039e-07	.	DM	M	EUR	Novel	-	-	-	-	-
SNAP29	P	22q11.21	0.01	HbA1c+Glucose	+	.	5.98933e-12	Cerebral dysgenesis, neuropathy, ichthyosis, and palmoplantar keratoderma syndrome (AR)	DM	F	EUR+	Novel	-	-	-	-	-
SOS2	PVS1_VSSM	14q21.3	0.01	HbA1c+Glucose	+	.	5.68352e-09	Noonan syndrome 9 (AD)	DM	M	EUR+	Novel	+	+	-	-	-
SPARC	PVS1_VS	5q33.1	0.01	HbA1c+Glucose	+	.	1.63611e-09	Osteogenesis imperfecta, type XVII (AR)	DM	M	EUR+	Novel	-	-	-	-	-
SEMA6A	P+LP+VUS_H	5q23.1	0.001	Obesity	+	2.15053	1.18386e-06	.	OB	B	EUR+	Novel	-	-	-	-	-
STAB1	P+LP+VUS_H	3p21.1	0.001	Cholesterol(+);LDL(+)	+	Atherogenic	.	[Hyperferritinemia] (AR)	DLP	M	EUR+	Novel	+	+	-	-	-
SUMO3	PVS1_M	21q22.3	0.01	HbA1c+Glucose	+	.	8.78753e-08	.	DM	F	EUR	Novel	-	-	-	-	-
SLC12A5	PVS1_VSSMP	20q13.12	singleton	BMI	+	7.70966	1.36333e-11	{Epilepsy, idiopathic generalized, susceptibility to, 14} (AD); Developmental and epileptic encephalopathy 34 (AR)	OB	F	EUR	Known	.	.	.	.	.
TACC2	PVS1_S	10q26.13	singleton	HbA1c+Glucose	+	.	1.84459e-08	.	DM	B	EUR+	Novel	+	+	-	-	-
SLC12A5	PVS1_VS	20q13.12	0.001	Obesity	+	6.89391	1.8397e-06	{Epilepsy, idiopathic generalized, susceptibility to, 14} (AD); Developmental and epileptic encephalopathy 34 (AR)	OB	B	EUR+	Known	.	.	.	.	.
TCF12	PVS1_VSSM	15q21.3	singleton	Essential_hypertension	+	4.33896	4.92971e-07	Craniosynostosis 3 (AD); Hypogonadotropic hypogonadism 26 with or without anosmia (AD, AR)	HT	B	EUR+	Novel	-	-	-	-	-
TCF12	PVS1_VSSM	15q21.3	singleton	HT_All	+	4.29664	5.70106e-07	Craniosynostosis 3 (AD); Hypogonadotropic hypogonadism 26 with or without anosmia (AD, AR)	HT	B	EUR+	Novel	-	-	-	-	-
TEC	PVS1_S	4p11	singleton	HbA1c+Glucose	+	.	3.21276e-07	.	DM	F	EUR+	Novel	-	-	-	-	-
SMAD6	P+LP+VUS_H	15q22.31	singleton	Apolipoprotein_A(+);HDL(+)	-	Protective	.	{Craniosynostosis 7, susceptibility to} (AD); {Radioulnar synostosis, nonsyndromic} (AD); Aortic valve disease 2 (AD)	DLP	M	EUR+	Novel	+	+	-	-	-
SSU72L6	PVS1_VSSMP	7q31.33	singleton	BMI	+	8.50339	4.54882e-07	.	OB	M	EUR+	Novel	-	-	-	-	-
TIMD4	P+LP+VUS_H	5q33.3	0.001	Apolipoprotein_B(+);Cholesterol(+);LDL(+);Triglycerides(+)	+	Atherogenic	.	.	DLP	F	EUR+	Novel	+	+	-	+	-
SYTL4	PVS1_VSS	Xq22.1	0.001	Obesity	+	3.08663	9.9849e-07	.	OB	B	EUR+	Novel	-	-	-	-	.
TM6SF2	P+LP+VUS_H+D	19p13.11	0.001	Apolipoprotein_B(-);Cholesterol(-);LDL(-);Triglycerides(-)	-	Protective	.	.	DLP	M	EUR+	Known	.	.	.	.	.
TAOK2	PVS1_VSS	16p11.2	singleton	BMI	+	3.4757	7.49503e-07	.	OB	B	EUR+	Novel	+	+	+	-	https://pmc.ncbi.nlm.nih.gov/articles/PMC8575313/
TFG	PVS1_VS	3q12.2	0.001	BMI	+	7.00237	2.10791e-06	?Spastic paraplegia 57, autosomal recessive (AR); Hereditary motor and sensory neuropathy, Okinawa type (AD)	OB	M	EUR+	Novel	-	-	-	-	-
THUMPD3	P+LP+VUS_H+D	3p25.3	0.01	Morbid_obesity	+	13.1878	1.27384e-06	.	OB	B	EUR+	Novel	+	+	-	-	.
TNRC6B	PVS1_VSS	22q13.1	singleton	HbA1c+Glucose	+	.	8.45839e-10	Global developmental delay with speech and behavioral abnormalities (AD)	DM	B	EUR+	Known	.	.	.	.	.
TNRC6B	PVS1_VSSMP	22q13.1	singleton	DM_All	+	4.01177	1.09728e-06	Global developmental delay with speech and behavioral abnormalities (AD)	DM	B	EUR+	Known	.	.	.	.	.
TNRC6B	PVS1_VSSMP	22q13.1	singleton	Type_2_diabetes	+	3.97997	1.88332e-06	Global developmental delay with speech and behavioral abnormalities (AD)	DM	B	EUR+	Known	.	.	.	.	.
TOMM40	P+LP+VUS_H+D	19q13.32	0.01	Apolipoprotein_B(+);Cholesterol(+);LDL(+)	+	Atherogenic	.	.	DLP	F	EUR+	Novel	+	+	-	-	-
TMED2	P+LP+VUS_H+D	12q24.31	singleton	BMI	+	3.94219	2.4805e-06	.	OB	B	EUR+	Novel	+	+	-	-	-
TTN	PVS1_VS	2q31.2	0.001	eGFR	+	1.74653	1.65672e-10	?Cardiomyopathy, familial hypertrophic, 9 (AD); Cardiomyopathy, dilated, 1G (AD); Congenital myopathy 5 with cardiomyopathy (AR); Muscular dystrophy, limb-girdle, autosomal recessive 10 (AR); Myopathy myofibrillar, 9, with early respiratory failure (AD); Tibial muscular dystrophy, tardive (AD)	CKD	F	EUR+	Known	.	.	.	.	.
TTN	PVS1_VS	2q31.2	0.001	SBP	-	-1.61673	4.69356e-07	?Cardiomyopathy, familial hypertrophic, 9 (AD); Cardiomyopathy, dilated, 1G (AD); Congenital myopathy 5 with cardiomyopathy (AR); Muscular dystrophy, limb-girdle, autosomal recessive 10 (AR); Myopathy myofibrillar, 9, with early respiratory failure (AD); Tibial muscular dystrophy, tardive (AD)	HT	B	EUR+	Complication_of_primary_finding	.	.	.	.	.
UBE2D4	D	7p13	singleton	HbA1c+Glucose	+	.	1.25089e-06	.	DM	M	EUR+	Novel	+	+	-	-	-
UBE2Z	P+LP+VUS_H	17q21.32	0.01	HbA1c+Glucose	+	.	2.37063e-10	.	DM	F	EUR+	Novel	+	+	-	-	-
UBE2Z	P+LP+VUS_H+D	17q21.32	0.001	SBP	+	9.15072	6.85121e-08	.	HT	B	EUR+	Novel	+	+	-	-	-
UBE2Z	P+LP+VUS_H+D	17q21.32	0.001	MAP	+	5.12633	3.2035e-07	.	HT	B	EUR+	Novel	+	+	-	-	-
UBE2Z	PVS1_VSS	17q21.32	0.001	Pure_hypercholesterolemia	+	7.00021	1.23007e-06	.	DLP	B	EUR+	Novel	+	+	-	-	https://pmc.ncbi.nlm.nih.gov/articles/PMC4583353/?utm_source=chatgpt.com
TMEM63B	D	6p21.1	0.001	BMI	+	0.921943	2.41849e-06	Developmental and epileptic encephalopathy 118 (AD)	OB	B	EUR+	Novel	-	-	-	-	.
TNK2	P+LP+VUS_H	3q29	0.001	BMI	+	0.814908	1.64985e-08	.	OB	B	EUR+	Known	.	.	.	.	.
UBR3	PVS1_VS	2q31.1	0.001	Essential_hypertension	+	3.64737	1.91462e-10	.	HT	B	EUR+	Known	.	.	.	.	.
UBR3	PVS1_VS	2q31.1	0.001	HT_All	+	3.59597	3.54914e-10	.	HT	B	EUR+	Known	.	.	.	.	.
UBR3	PVS1_VSS	2q31.1	0.001	Type_2_diabetes	+	3.91538	6.70508e-08	.	DM	B	EUR+	Known	.	.	.	.	.
UBR3	PVS1_VSS	2q31.1	0.001	DM_All	+	3.71055	1.96673e-07	.	DM	B	EUR+	Known	.	.	.	.	.
UGT2B7	P+LP+VUS_H+D	4q13.2	0.01	Apolipoprotein_B(-);Cholesterol(-);LDL(-);Triglycerides(-)	-	Protective	.	.	DLP	B	EUR+	Novel	+	+	-	-	-
UMOD	P+LP	16p12.3	0.001	End_stage_renal_disease_CDK_stage_5	+	39.8193	2.34121e-14	Tubulointerstitial kidney disease, autosomal dominant, 1 (AD)	CKD	B	EUR+	Known	.	.	.	.	.
TOX4	P+LP	14q11.2	0.001	BMI	+	3.40542	1.57345e-06	.	OB	B	EUR+	Novel	+	+	-	-	-
UBR2	PVS1_VSSM	6p21.1	0.001	BMI	+	1.74097	1.17815e-06	.	OB	B	EUR+	Known	.	.	.	.	.
UBR3	PVS1_VSSM	2q31.1	0.001	BMI	+	2.58172	1.18846e-11	.	OB	B	EUR+	Known	.	.	.	.	.
VEGFC	D	4q34.3	0.01	Essential_hypertension	+	1.12608	2.92229e-07	Lymphatic malformation 4 (AD)	HT	B	EUR+	Novel	-	-	-	-	-
VEGFC	D	4q34.3	0.01	HT_All	+	1.12338	4.51822e-07	Lymphatic malformation 4 (AD)	HT	B	EUR+	Novel	-	-	-	-	-
WWTR1	P+LP+VUS_H	3q25.1	singleton	HbA1c+Glucose	+	.	1.86899e-19	.	DM	M	EUR	Novel	+	+	-	-	-
YTHDF1	P+LP	20q13.33	0.01	HbA1c+Glucose	+	.	7.63324e-09	.	DM	B	EUR+	Novel	-	-	-	-	-
VCF1	D	17q25.1	singleton	BMI	+	11.2605	1.07361e-09	.	OB	M	EUR	Novel	+	-	+	-	-
ZCCHC24	D	10q22.3	0.01	HbA1c+Glucose	+	.	1.92332e-11	.	DM	F	EUR+	Novel	-	-	-	-	-
ZKSCAN4	PVS1_VSSM	6p22.1	0.001	Chronic_kidney_disease	+	3.2202	6.42678e-07	.	CKD	M	EUR+	Novel	-	-	-	-	-
ZKSCAN4	PVS1_VSSM	6p22.1	0.001	CKD_All	+	3.44919	7.98343e-07	.	CKD	M	EUR+	Novel	-	-	-	-	-
ZMIZ1	PVS1_M	10q22.3	0.01	HbA1c+Glucose	+	.	1.09472e-07	Neurodevelopmental disorder with dysmorphic facies and distal skeletal anomalies (AD)	DM	M	EUR	Novel	+	+	-	-	-
ZBTB11	P+LP+VUS_H+D	3q12.3	0.001	BMI	+	1.42047	4.36594e-09	Intellectual developmental disorder, autosomal recessive 69 (AR)	OB	B	EUR+	Novel	-	-	-	-	-
ZNF229	PVS1_S	19q13.31	0.01	Apolipoprotein_B(-);Cholesterol(-);LDL(-)	-	Protective	.	.	DLP	M	EUR+	Known	.	.	.	.	.
ZNF333	PVS1_M	19p13.12	0.001	Apolipoprotein_B(+);LDL(+)	+	Atherogenic	.	.	DLP	F	EUR	Novel	-	-	-	-	-
ZMYND12	PVS1_VS	1p34.2	singleton	BMI	+	5.83688	1.57822e-06	.	OB	F	EUR+	Novel	-	-	-	-	-
ZNF77	P+LP+VUS_H	19p13.3	singleton	BMI	+	3.34024	6.73594e-07	.	OB	M	EUR+	Novel	-	-	-	-	-
ZNRF1	P+LP+VUS_H+D	16q23.1	singleton	HbA1c+Glucose	+	.	9.53746e-09	.	DM	M	EUR	Novel	-	-	-	-	-
ZRANB1	P+LP+VUS_H	10q26.13	0.001	Chronic_kidney_disease	+	8.70229	7.30755e-09	.	CKD	F	EUR+	Novel	+	+	-	-	-
ZRANB1	P+LP+VUS_H	10q26.13	0.001	CKD_All	+	8.39631	1.20583e-08	.	CKD	F	EUR+	Novel	+	+	-	-	-

## Sheet: S. Table 5
#Supplementary Table 5. Summary of the genome-wide significant results.
Gene	Phenotype	Finding	Sex	Ancestry	Support	Hormone_signature	Direction
ABAT	HT	Novel	B	EUR+	+	.	Protective
ABCA1	DLP	Known	M;F	EUR+	.	.	Risk
ABCA6	DLP	Known	F	EUR+	.	.	Risk
ABCG5	DLP	Known	B	EUR+	.	.	Risk
ACVR1	DM	Novel	B	EUR+	+	.	Risk
AFF3	OB	Novel	F	EUR+	+	.	Risk
AHSP	HT	Novel	F	EUR+	+	.	Risk
ALKBH1	DM	Novel	B	EUR+	-	.	Risk
ANGPTL3	DLP	Known	B	EUR+	.	.	Protective
ANGPTL4	DLP	Known	M	EUR+	.	.	Protective
ANGPTL8	DLP	Known	B	EUR+	.	.	Protective
ANKH	DM	Known	B	EUR	.	.	Risk
AP5Z1	OB	Novel	M	EUR+	-	.	Risk
APBA1	OB	Known	B	EUR+	.	.	Risk
APOA1	DLP	Known	M	EUR+	.	.	Risk
APOA5	DLP	Known	B	EUR	.	.	Risk
APOB	DLP	Known	B	EUR+	.	.	Protective
APOC3	DM	Novel	F	EUR+	+	.	Risk
APOC3	DLP	Known	B	EUR+	.	.	Protective
APOE	DLP	Known	F	EUR+	.	.	Protective
ASB18	DM	Novel	M	EUR+	-	.	Risk
ASCL2	DM	Novel	F	EUR	+	.	Risk
ASGR1	DLP	Known	M	EUR+	.	Oestrodiol+	Protective
ATF4	OB	Novel	B	EUR+	-	.	Risk
ATP13A1	OB	Known	B	EUR+	.	FAI+;Testosterone+	Risk
NFIC	DLP	Novel	B	EUR+	+	Oestrodiol+	Risk
ATP8A2	HT	Novel	M	EUR+	+	.	Risk
BHLHA9	DLP	Novel	B	EUR+	-	.	Risk
BMAL1	DM	Novel	M	EUR+	+	.	Risk
BMP8B	DM	Novel	M	EUR+	-	.	Risk
BTNL9	DM	Novel	F	EUR+	-	.	Risk
SMAD6	DLP	Novel	M	EUR+	+	SHBG+	Protective
C1QC	DM	Novel	B	EUR	-	.	Risk
CALCR	OB	Known	B	EUR+	.	.	Risk
STAB1	DLP	Novel	M	EUR+	+	Oestrodiol+	Risk
CCM2	OB	Novel	M	EUR+	-	.	Risk
CD36	DLP	Known	M	EUR+	.	.	Protective
CD47	DM	Novel	F	EUR	-	.	Risk
CELF4	DM	Novel	F	EUR+	+	.	Risk
CEP85L	DM	Novel	F	EUR+	-	.	Risk
CETP	DLP	Known	M	EUR+	.	.	Protective
CKAP5	OB	Novel	B	EUR+	+	.	Risk
COL16A1	OB	Novel	F	EUR+	+	.	Protective
COL18A1	DLP	Known	B	EUR+	.	.	Risk
COL21A1	HT	Known	B	EUR+	.	.	Risk
COL4A4	HT	Known	B	EUR+	.	.	Risk
COL4A4	CKD	Known	B	EUR+	.	.	Risk
COPB1	HT	Novel	M	EUR+	-	.	Risk
CPSF6	OB	Novel	B	EUR+	+	.	Risk
CREB3L3	DLP	Known	B	EUR+	.	SHBG+	Risk
CREBBP	OB	Known	M	EUR+	.	.	Risk
CREBBP	DM	Novel	B	EUR+	+	.	Risk
CREM	HT	Novel	B	EUR+	-	.	Risk
CYP2E1	HT	Novel	F	EUR+	-	.	Risk
DACT2	OB	Novel	M	EUR+	-	.	Risk
DBH	HT	Known	B	EUR+	.	.	Protective
C1orf167	DM	Novel	M	EUR	-	Testosterone+	Risk
DEFB114	DM	Novel	B	EUR+	-	.	Risk
DENR	OB	Novel	F	EUR+	+	.	Risk
DGAT2	DLP	Known	B	EUR+	.	.	Risk
DHX36	DM	Novel	F	EUR	-	.	Risk
DIDO1	OB	Known	F	EUR+	.	.	Risk
DIMT1	DM	Novel	B	EUR+	-	.	Risk
DNAJC13	DLP	Novel	F	EUR+	+	.	Protective
DDR2	DM	Novel	F	EUR+	+	FAI+	Risk
DNMT3B	OB	Novel	B	EUR+	+	.	Risk
DOCK1	OB	Novel	B	EUR+	+	.	Risk
DNMT1	DM	Novel	M	EUR+	-	Testosterone+	Risk
DSG3	DM	Novel	M	EUR+	-	.	Risk
DTNB	OB	Novel	B	EUR+	+	.	Risk
DZANK1	DM	Novel	F	EUR+	-	.	Risk
ECD	HT	Novel	M	EUR+	+	.	Protective
EGR3	OB	Novel	B	EUR+	-	.	Risk
EI24	OB	Novel	B	EUR+	+	.	Risk
ELOVL4	DM	Novel	F	EUR	-	FAI+	Risk
EPS8L1	OB	Novel	B	EUR+	-	.	Risk
EVI5	DLP	Known	F	EUR+	.	.	Risk
FAHD2A	DM	Novel	F	EUR+	-	FAI+	Risk
FAM118A	DM	Novel	M	EUR+	+	FAI+	Risk
FES	HT	Known	B	EUR+	.	.	Risk
FRMD7	DM	Novel	B	EUR+	-	.	Risk
G0S2	DM	Novel	F	EUR	-	FAI+;Testosterone+	Risk
G6PC1	DLP	Known	B	EUR+	.	SHBG-	Risk
G6PC2	DM	Known	B	EUR+	.	.	Protective
GAS6	DLP	Novel	B	EUR+	+	.	Risk
GATA5	HT	Novel	B	EUR+	+	.	Risk
GATC	OB	Novel	M	EUR+	-	.	Risk
GCDH	OB	Novel	B	EUR+	-	.	Risk
GCK	DM	Known	B	EUR	.	FAI+	Risk
GCK	DLP	Known	B	EUR+	.	FAI+	Protective
GCKR	DLP	Known	B	EUR+	.	Oestrodiol+;SHBG-	Risk
GFAP	OB	Novel	F	EUR	-	.	Risk
GIGYF1	DM	Known	B	EUR+	.	.	Risk
GIGYF1	DLP	Known	B	EUR+	.	.	Protective
GIPR	OB	Known	B	EUR+	.	.	Protective
GLTPD2	DLP	Novel	F	EUR+	+	.	Protective
GLYATL1	DLP	Novel	F	EUR+	-	.	Risk
GNAZ	OB	Novel	B	EUR+	+	.	Risk
GPR151	OB	Known	B	EUR+	.	.	Protective
GSC2	DM	Novel	F	EUR	-	.	Risk
GUCY1A1	HT	Known	B	EUR+	.	.	Risk
HBB	DLP	Known	B	EUR+	.	Testosterone+	Protective
HBG2	DM	Novel	M	EUR+	-	.	Risk
HCRTR2	OB	Novel	B	EUR+	+	.	Risk
HEATR5B	CKD	Novel	F	EUR+	-	.	Risk
HECTD4	OB	Novel	B	EUR+	+	.	Risk
HECTD4	DM	Novel	F	EUR+	+	.	Risk
HELZ	OB	Novel	B	EUR+	-	.	Risk
HIF1AN	OB	Novel	F	EUR+	+	.	Risk
HMGA2	DM	Novel	B	EUR+	+	.	Risk
HMGCR	DLP	Known	B	EUR+	.	.	Protective
HMHB1	DM	Novel	F	EUR	-	.	Risk
HNF1A	DM	Known	B	EUR	.	.	Risk
HNF1A	DLP	Novel	F	EUR	+	.	Protective
HNF4A	DM	Known	B	EUR+	.	FAI+;SHBG-;Testosterone-	Risk
HP1BP3	DM	Novel	B	EUR	-	.	Risk
HRG	DLP	Novel	F	EUR+	+	.	Risk
HSD17B6	DM	Novel	F	EUR+	+	.	Risk
IGF1R	DM	Known	B	EUR+	.	FAI+	Risk
IL10	DM	Novel	B	EUR	+	.	Risk
IMPDH1	DM	Novel	F	EUR+	-	Oestrodiol+	Risk
IRAK4	DM	Novel	M	EUR+	-	.	Risk
IRS2	DM	Known	B	EUR+	.	.	Risk
JADE1	DM	Novel	B	EUR	-	.	Risk
JAK2	CKD	Known	B	EUR+	.	.	Risk
KAT6A	DM	Novel	B	EUR+	+	.	Risk
KCNMA1	OB	Novel	F	EUR+	+	.	Risk
KCNN4	DLP	Novel	B	EUR+	+	.	Risk
KIF2C	OB	Novel	F	EUR+	-	.	Risk
LCAT	DLP	Known	M	EUR+	.	.	Risk
LDLR	DLP	Known	B	EUR+	.	.	Risk
LIPC	DLP	Known	M	EUR+	.	.	Protective
LIPG	DLP	Known	M	EUR+	.	.	Protective
LONRF3	OB	Novel	B	EUR+	+	.	Risk
LPL	DLP	Known	B	EUR+	.	.	Risk
LRP10	DM	Novel	F	EUR+	-	Oestrodiol+	Risk
MAP3K15	DM	Known	B	EUR+	.	.	Protective
MC4R	OB	Known	B	EUR+	.	.	Risk
MGME1	DM	Novel	F	EUR+	+	.	Risk
MIB1	OB	Novel	F	EUR+	-	.	Risk
MOSPD3	DM	Novel	M	EUR+	-	.	Risk
MRFAP1	DM	Novel	F	EUR+	-	.	Risk
MRPL11	DM	Novel	F	EUR	-	.	Risk
MYCBP2	DM	Novel	B	EUR+	-	.	Risk
MYH2	OB	Novel	B	EUR+	-	.	Risk
NEUROD1	DM	Known	B	EUR	.	.	Risk
PSG11	DM	Novel	M	EUR+	+	Oestrodiol+	Risk
NHERF2	HT	Known	B	EUR+	.	.	Protective
NKX2-1	DM	Novel	F	EUR+	+	.	Risk
NOS3	HT	Known	B	EUR+	.	.	Risk
NPC1L1	DLP	Known	B	EUR+	.	.	Protective
NPR1	HT	Known	B	EUR+	.	.	Risk
NR1H3	DLP	Known	M	EUR+	.	.	Protective
NR1H4	DLP	Known	B	EUR+	.	.	Protective
NTRK2	OB	Known	B	EUR+	.	.	Risk
OR10Q1	DM	Novel	M	EUR+	-	.	Risk
ORAI3	CKD	Novel	M	EUR+	+	.	Risk
PACC1	CKD	Novel	B	EUR+	-	.	Risk
PAM	DM	Known	B	EUR+	.	.	Risk
PCSK1	OB	Known	B	EUR	.	.	Risk
PCSK2	OB	Novel	B	EUR+	+	.	Risk
PCSK9	DLP	Known	B	EUR+	.	.	Protective
PDE3B	DLP	Known	F	EUR+	.	Testosterone+	Protective
PDX1	DM	Known	B	EUR+	.	.	Risk
PI4KA	HT	Novel	B	EUR+	-	.	Protective
PKD1	CKD	Known	B	EUR+	.	Oestrodiol+	Risk
PKD1	HT	Known	B	EUR+	.	Oestrodiol+	Risk
PKD2	CKD	Known	B	EUR	.	.	Risk
PKD2	HT	Known	B	EUR+	.	.	Risk
PKN2	CKD	Novel	F	EUR+	-	.	Risk
PLA2G12A	DLP	Known	F	EUR+	.	SHBG+;Testosterone+	Risk
PLIN1	DLP	Known	B	EUR+	.	.	Protective
POGK	HT	Novel	F	EUR+	-	.	Risk
POGZ	OB	Known	B	EUR+	.	.	Risk
PPARG	DLP	Known	F	EUR+	.	.	Risk
PRSS53	DM	Novel	F	EUR+	-	.	Risk
YTHDF1	DM	Novel	B	EUR+	-	FAI+	Risk
PTBP2	DLP	Novel	B	EUR+	-	.	Risk
PTEN	OB	Known	B	EUR+	.	.	Risk
PTEN	DM	Known	F	EUR	.	.	Risk
PTOV1	OB	Known	B	EUR+	.	.	Risk
PTPRG	OB	Known	F	EUR+	.	Oestrodiol+	Risk
RAI1	OB	Known	F	EUR	.	.	Risk
RAP2B	OB	Novel	B	EUR+	-	.	Risk
RAPGEF2	DM	Novel	B	EUR	-	.	Risk
RB1CC1	OB	Novel	F	EUR+	+	.	Risk
RB1CC1	DM	Novel	F	EUR+	-	.	Risk
RBAK	DM	Novel	B	EUR	-	.	Risk
RBM12	DM	Novel	B	EUR	-	.	Risk
REEP4	OB	Novel	F	EUR+	-	.	Risk
RGL3	HT	Known	B	EUR+	.	.	Protective
RMND1	DM	Novel	B	EUR+	-	.	Risk
RPS17	DM	Novel	F	EUR	-	.	Risk
RRBP1	DLP	Known	M	EUR+	.	.	Protective
RUVBL2	OB	Novel	F	EUR+	+	.	Risk
SCML4	OB	Novel	F	EUR+	-	.	Risk
SCYGR5	FLD	Novel	B	EUR+	-	.	Risk
SEMA6A	OB	Novel	B	EUR	-	.	Risk
SERPINB6	DM	Novel	F	EUR+	-	.	Risk
SH2B3	DLP	Known	F	EUR+	.	.	Risk
SIN3A	DM	Novel	B	EUR	+	.	Risk
SIPA1	HT	Novel	B	EUR+	+	.	Protective
SLC12A5	OB	Known	B	EUR	.	.	Risk
SLC16A4	DM	Novel	F	EUR+	-	.	Risk
SLC22A2	CKD	Novel	B	EUR+	+	.	Risk
SLC22A7	CKD	Novel	B	EUR+	+	.	Risk
SLC4A1	DLP	Novel	M	EUR+	+	.	Protective
SLTM	OB	Known	B	EUR+	.	.	Risk
SLTM	DM	Known	B	EUR+	.	.	Risk
ATP1A2	OB	Novel	B	EUR+	+	FAI+	Risk
SMARCA4	DLP	Novel	B	EUR+	+	.	Risk
SMG1	DM	Novel	M	EUR	-	.	Risk
SNAP29	DM	Novel	F	EUR+	-	.	Risk
SOS2	DM	Novel	M	EUR+	+	.	Risk
SPARC	DM	Novel	M	EUR+	-	.	Risk
SSU72L6	OB	Novel	M	EUR+	-	.	Risk
CASTOR2	OB	Novel	B	EUR+	+	FAI+	Risk
SUMO3	DM	Novel	F	EUR	-	.	Risk
SYTL4	OB	Novel	B	EUR+	-	.	Risk
TACC2	DM	Novel	B	EUR+	+	.	Risk
TAOK2	OB	Novel	B	EUR+	+	.	Risk
TCF12	HT	Novel	B	EUR+	-	.	Risk
TEC	DM	Novel	F	EUR+	-	.	Risk
TFG	OB	Novel	M	EUR+	-	.	Risk
THUMPD3	OB	Novel	B	EUR+	+	.	Risk
TIMD4	DLP	Novel	F	EUR+	+	.	Risk
TLX1	DM	Novel	M	EUR+	-	.	Risk
TM6SF2	DLP	Known	M	EUR+	.	.	Protective
TMED2	OB	Novel	B	EUR+	+	.	Risk
TMEM63B	OB	Novel	B	EUR+	-	.	Risk
TNK2	OB	Known	B	EUR+	.	.	Risk
TNRC6B	DM	Known	B	EUR+	.	.	Risk
TOMM40	DLP	Novel	F	EUR+	+	.	Risk
TOX4	OB	Novel	B	EUR+	+	.	Risk
UBE2D4	DM	Novel	M	EUR+	+	.	Risk
UBE2Z	DM	Novel	F	EUR+	+	.	Risk
UBE2Z	HT	Novel	B	EUR+	+	.	Risk
UBE2Z	DLP	Novel	B	EUR+	+	.	Risk
UBR2	OB	Known	B	EUR+	.	.	Risk
UBR3	OB	Known	B	EUR+	.	FAI+	Risk
UBR3	HT	Known	B	EUR+	.	FAI+	Risk
UBR3	DM	Known	B	EUR+	.	FAI+	Risk
UGT2B7	DLP	Novel	B	EUR+	+	.	Protective
UMOD	CKD	Known	B	EUR+	.	.	Risk
USP48	CKD	Novel	B	EUR+	-	.	Risk
VCF1	OB	Novel	M	EUR	+	.	Risk
VEGFC	HT	Novel	B	EUR+	-	.	Risk
WWTR1	DM	Novel	M	EUR	+	.	Risk
DPP9	OB	Novel	B	EUR+	-	SHBG+	Protective
ZBTB11	OB	Novel	B	EUR+	-	.	Risk
ZCCHC24	DM	Novel	F	EUR+	-	.	Risk
ZKSCAN4	CKD	Novel	M	EUR+	-	.	Risk
ZMIZ1	DM	Novel	M	EUR	+	.	Risk
ZMYND12	OB	Novel	F	EUR+	-	.	Risk
ZNF229	DLP	Known	M	EUR+	.	.	Protective
ZNF333	DLP	Novel	F	EUR	-	.	Risk
ZNF496	DLP	Novel	B	EUR+	-	.	Risk
ZNF77	OB	Novel	M	EUR+	-	.	Risk
ZNRF1	DM	Novel	M	EUR	-	.	Risk
ZRANB1	CKD	Novel	F	EUR+	+	.	Risk

## Sheet: S. Table 6
#Supplementary Table 6. Summary statistics of the genome-wide associations.
	Phenotype	Replication	Discovery	Discovery with Support			Cohort	Both	Sex-specific
All	OB	20	50	25		Replication	EUR	8	2
	FLD	0	1	0			EUR+	74	10
	DLP	41	20	15			Ancestry increase	9.4
	HT	12	14	7			Sex-specific increase	0.146341
	CKD	5	9	4		Discovery	EUR	9	19
	DM	16	72	23			EUR+	65	73
	Total	94	166	74			Ancestry increase	5.92857
	Total unique gene	85	162	71			Sex-specific increase	1.24324
Risk	OB	18	48	24
	FLD	0	1	0
	DLP	17	14	9
	HT	9	10	4
	CKD	5	9	4
	DM	14	72	23
	Total	63	154	64
Protective	OB	2	2	1
	FLD	0	0	0
	DLP	24	6	6
	HT	3	4	3
	CKD	0	0	0
	DM	2	0	0
	Total	31	12	10

## Sheet: S. Table 7
#Supplementary Table 7. Summary of dyslipidemia associations.
Gene	Mask	Max_AF	Chr	Pos	Cohort	AAF	Num_Cases	Cases_Het	Cases_Alt	Trait	Class
ANGPTL3	P+LP+VUS_H+D	0.001	1	62597568	AFR__AMR__CSA__EUR__OTH	0.00209997	193859	814.2	0	Apolipoprotein_A(-);Apolipoprotein_B(-);Cholesterol(-);HDL(-);LDL(-);Triglycerides(-)	Mixed
ANGPTL3	P+LP+VUS_H+D	0.01	1	62597568	AFR__AMR__CSA__EAS__EUR__OTH	0.00214732	194474	835.2	0	Apolipoprotein_A(-);Apolipoprotein_B(-);Cholesterol(-);HDL(-);LDL(-);Triglycerides(-)	Mixed
APOB	PVS1_VS	0.001	2	21001742	AFR__CSA__EAS__EUR__OTH	0.00109111	194297	424	0	Apolipoprotein_A(+);Apolipoprotein_B(-);Cholesterol(-);HDL(+);LDL(-);Triglycerides(-)	Protective
APOB	PVS1_VS	0.01	2	21001742	AFR__CSA__EAS__EUR__OTH	0.00109111	194297	424	0	Apolipoprotein_A(+);Apolipoprotein_B(-);Cholesterol(-);HDL(+);LDL(-);Triglycerides(-)	Protective
ANGPTL3	P+LP+VUS_H	0.001	1	62597568	AFR__AMR__CSA__EAS__EUR__OTH	0.00105853	224840	476	0	Apolipoprotein_A(-);Apolipoprotein_B(-);Cholesterol(-);HDL(-);LDL(-);Triglycerides(-)	Mixed
ANGPTL3	P+LP+VUS_H	0.01	1	62597568	AFR__AMR__CSA__EAS__EUR__OTH	0.00105853	224840	476	0	Apolipoprotein_A(-);Apolipoprotein_B(-);Cholesterol(-);HDL(-);LDL(-);Triglycerides(-)	Mixed
ANGPTL3	P+LP+VUS_H+D	0.001	1	62597568	AFR__AMR__CSA__EAS__EUR__OTH	0.00207822	224840	934.53	0	Apolipoprotein_A(-);Apolipoprotein_B(-);Cholesterol(-);HDL(-);LDL(-);Triglycerides(-)	Mixed
ANGPTL3	P+LP+VUS_H+D	0.01	1	62597568	AFR__AMR__CSA__EAS__EUR__OTH	0.00207822	224840	934.53	0	Apolipoprotein_A(-);Apolipoprotein_B(-);Cholesterol(-);HDL(-);LDL(-);Triglycerides(-)	Mixed
ANGPTL3	P	0.001	1	62597568	AFR__AMR__EAS__EUR__OTH	0.000621151	411333	511	0	Apolipoprotein_A(-);Apolipoprotein_B(-);Cholesterol(-);HDL(-);LDL(-);Triglycerides(-)	Mixed
ANGPTL3	P	0.01	1	62597568	AFR__AMR__EAS__EUR__OTH	0.000621151	411333	511	0	Apolipoprotein_A(-);Apolipoprotein_B(-);Cholesterol(-);HDL(-);LDL(-);Triglycerides(-)	Mixed
ANGPTL3	P+LP	0.001	1	62597568	AFR__AMR__CSA__EAS__EUR__OTH	0.000771498	419314	647	0	Apolipoprotein_A(-);Apolipoprotein_B(-);Cholesterol(-);HDL(-);LDL(-);Triglycerides(-)	Mixed
ANGPTL3	P+LP	0.01	1	62597568	AFR__AMR__CSA__EAS__EUR__OTH	0.000771498	419314	647	0	Apolipoprotein_A(-);Apolipoprotein_B(-);Cholesterol(-);HDL(-);LDL(-);Triglycerides(-)	Mixed
ANGPTL3	P+LP+VUS_H	0.001	1	62597568	AFR__AMR__CSA__EAS__EUR__OTH	0.00104591	419314	877.13	0	Apolipoprotein_A(-);Apolipoprotein_B(-);Cholesterol(-);HDL(-);LDL(-);Triglycerides(-)	Mixed
ANGPTL3	P+LP+VUS_H	0.01	1	62597568	AFR__AMR__CSA__EAS__EUR__OTH	0.00104591	419314	877.13	0	Apolipoprotein_A(-);Apolipoprotein_B(-);Cholesterol(-);HDL(-);LDL(-);Triglycerides(-)	Mixed
ANGPTL3	P+LP+VUS_H+D	0.001	1	62597568	AFR__AMR__CSA__EAS__EUR__OTH	0.00210971	419314	1769.26	0	Apolipoprotein_A(-);Apolipoprotein_B(-);Cholesterol(-);HDL(-);LDL(-);Triglycerides(-)	Mixed
ANGPTL3	P+LP+VUS_H+D	0.01	1	62597568	AFR__AMR__CSA__EAS__EUR__OTH	0.00210971	419314	1769.26	0	Apolipoprotein_A(-);Apolipoprotein_B(-);Cholesterol(-);HDL(-);LDL(-);Triglycerides(-)	Mixed
ANGPTL3	PVS1_VS	0.001	1	62597568	AFR__AMR__CSA__EAS__EUR__OTH	0.000963478	419314	808	0	Apolipoprotein_A(-);Apolipoprotein_B(-);Cholesterol(-);HDL(-);LDL(-);Triglycerides(-)	Mixed
ANGPTL3	PVS1_VS	0.01	1	62597568	AFR__AMR__CSA__EAS__EUR__OTH	0.000963478	419314	808	0	Apolipoprotein_A(-);Apolipoprotein_B(-);Cholesterol(-);HDL(-);LDL(-);Triglycerides(-)	Mixed
ANGPTL3	PVS1_VSS	0.001	1	62597568	AFR__AMR__CSA__EAS__EUR__OTH	0.00103637	419314	869.13	0	Apolipoprotein_A(-);Apolipoprotein_B(-);Cholesterol(-);HDL(-);LDL(-);Triglycerides(-)	Mixed
ANGPTL3	PVS1_VSS	0.01	1	62597568	AFR__AMR__CSA__EAS__EUR__OTH	0.00103637	419314	869.13	0	Apolipoprotein_A(-);Apolipoprotein_B(-);Cholesterol(-);HDL(-);LDL(-);Triglycerides(-)	Mixed
ANGPTL3	PVS1_VSSM	0.001	1	62597568	AFR__AMR__CSA__EAS__EUR__OTH	0.00106261	419314	891.13	0	Apolipoprotein_A(-);Apolipoprotein_B(-);Cholesterol(-);HDL(-);LDL(-);Triglycerides(-)	Mixed
ANGPTL3	PVS1_VSSM	0.01	1	62597568	AFR__AMR__CSA__EAS__EUR__OTH	0.00106261	419314	891.13	0	Apolipoprotein_A(-);Apolipoprotein_B(-);Cholesterol(-);HDL(-);LDL(-);Triglycerides(-)	Mixed
ANGPTL3	PVS1_VSSMP	0.001	1	62597568	AFR__AMR__CSA__EAS__EUR__OTH	0.00106261	419314	891.13	0	Apolipoprotein_A(-);Apolipoprotein_B(-);Cholesterol(-);HDL(-);LDL(-);Triglycerides(-)	Mixed
ANGPTL3	PVS1_VSSMP	0.01	1	62597568	AFR__AMR__CSA__EAS__EUR__OTH	0.00106261	419314	891.13	0	Apolipoprotein_A(-);Apolipoprotein_B(-);Cholesterol(-);HDL(-);LDL(-);Triglycerides(-)	Mixed
APOB	PVS1_VS	0.001	2	21001742	AFR__CSA__EAS__EUR__OTH	0.0011809	418810	989.15	0	Apolipoprotein_A(+);Apolipoprotein_B(-);Cholesterol(-);HDL(+);LDL(-);Triglycerides(-)	Protective
APOB	PVS1_VS	0.01	2	21001742	AFR__CSA__EAS__EUR__OTH	0.0011809	418810	989.15	0	Apolipoprotein_A(+);Apolipoprotein_B(-);Cholesterol(-);HDL(+);LDL(-);Triglycerides(-)	Protective
APOC3	PVS1_P	0.01	11	116830568	AFR__CSA__EUR__OTH	0.0022666	193682	878	0	Apolipoprotein_A(+);Apolipoprotein_B(-);HDL(+);LDL(-);Triglycerides(-)	Protective
APOC3	PVS1_VSSMP	0.01	11	116830568	AFR__CSA__EUR__OTH	0.00258671	193682	1002	0	Apolipoprotein_A(+);Apolipoprotein_B(-);HDL(+);LDL(-);Triglycerides(-)	Protective
ANGPTL3	P+LP	0.001	1	62597568	AFR__AMR__CSA__EUR__OTH	0.000724754	193859	281	0	Apolipoprotein_A(-);Apolipoprotein_B(-);Cholesterol(-);LDL(-);Triglycerides(-)	Mixed
ANGPTL3	P+LP	0.01	1	62597568	AFR__AMR__CSA__EAS__EUR__OTH	0.000727604	194474	283	0	Apolipoprotein_A(-);Apolipoprotein_B(-);Cholesterol(-);LDL(-);Triglycerides(-)	Mixed
ANGPTL3	P+LP+VUS_H	0.001	1	62597568	AFR__AMR__CSA__EUR__OTH	0.00103064	193859	399.6	0	Apolipoprotein_A(-);Apolipoprotein_B(-);Cholesterol(-);LDL(-);Triglycerides(-)	Mixed
ANGPTL3	P+LP+VUS_H	0.01	1	62597568	AFR__AMR__CSA__EAS__EUR__OTH	0.00103252	194474	401.6	0	Apolipoprotein_A(-);Apolipoprotein_B(-);Cholesterol(-);LDL(-);Triglycerides(-)	Mixed
ANGPTL3	PVS1_VS	0.001	1	62597568	AFR__AMR__CSA__EUR__OTH	0.000938827	193859	364	0	Apolipoprotein_A(-);Apolipoprotein_B(-);Cholesterol(-);LDL(-);Triglycerides(-)	Mixed
ANGPTL3	PVS1_VS	0.01	1	62597568	AFR__AMR__CSA__EAS__EUR__OTH	0.000941	194474	366	0	Apolipoprotein_A(-);Apolipoprotein_B(-);Cholesterol(-);LDL(-);Triglycerides(-)	Mixed
ANGPTL3	PVS1_VSS	0.001	1	62597568	AFR__AMR__CSA__EUR__OTH	0.00102032	193859	395.6	0	Apolipoprotein_A(-);Apolipoprotein_B(-);Cholesterol(-);LDL(-);Triglycerides(-)	Mixed
ANGPTL3	PVS1_VSS	0.01	1	62597568	AFR__AMR__CSA__EAS__EUR__OTH	0.00102224	194474	397.6	0	Apolipoprotein_A(-);Apolipoprotein_B(-);Cholesterol(-);LDL(-);Triglycerides(-)	Mixed
ANGPTL3	PVS1_VSSM	0.001	1	62597568	AFR__AMR__CSA__EUR__OTH	0.00105127	193859	407.6	0	Apolipoprotein_A(-);Apolipoprotein_B(-);Cholesterol(-);LDL(-);Triglycerides(-)	Mixed
ANGPTL3	PVS1_VSSM	0.01	1	62597568	AFR__AMR__CSA__EAS__EUR__OTH	0.00105309	194474	409.6	0	Apolipoprotein_A(-);Apolipoprotein_B(-);Cholesterol(-);LDL(-);Triglycerides(-)	Mixed
ANGPTL3	PVS1_VSSMP	0.001	1	62597568	AFR__AMR__CSA__EUR__OTH	0.00105127	193859	407.6	0	Apolipoprotein_A(-);Apolipoprotein_B(-);Cholesterol(-);LDL(-);Triglycerides(-)	Mixed
ANGPTL3	PVS1_VSSMP	0.01	1	62597568	AFR__AMR__CSA__EAS__EUR__OTH	0.00105309	194474	409.6	0	Apolipoprotein_A(-);Apolipoprotein_B(-);Cholesterol(-);LDL(-);Triglycerides(-)	Mixed
APOB	P+LP	singleton	2	21001742	AFR__CSA__EAS__EUR__OTH	0.000138531	209339	58	0	Apolipoprotein_B(-);Cholesterol(-);HDL(+);LDL(-);Triglycerides(-)	Protective
APOB	P+LP+VUS_H	singleton	2	21001742	AFR__CSA__EAS__EUR__OTH	0.000160028	209339	67	0	Apolipoprotein_B(-);Cholesterol(-);HDL(+);LDL(-);Triglycerides(-)	Protective
APOB	PVS1_VS	singleton	2	21001742	AFR__CSA__EAS__EUR__OTH	0.000128977	209339	54	0	Apolipoprotein_B(-);Cholesterol(-);HDL(+);LDL(-);Triglycerides(-)	Protective
APOB	PVS1_VSS	singleton	2	21001742	AFR__CSA__EAS__EUR__OTH	0.000148085	209339	62	0	Apolipoprotein_B(-);Cholesterol(-);HDL(+);LDL(-);Triglycerides(-)	Protective
APOB	PVS1_VSS	0.001	2	21001742	AFR__CSA__EAS__EUR__OTH	0.000832137	209339	348.4	0	Apolipoprotein_B(-);Cholesterol(-);HDL(+);LDL(-);Triglycerides(-)	Protective
APOB	PVS1_VSS	0.01	2	21001742	AFR__CSA__EAS__EUR__OTH	0.000832137	209339	348.4	0	Apolipoprotein_B(-);Cholesterol(-);HDL(+);LDL(-);Triglycerides(-)	Protective
APOB	PVS1_VSSM	singleton	2	21001742	AFR__CSA__EAS__EUR__OTH	0.000191078	209339	80	0	Apolipoprotein_B(-);Cholesterol(-);HDL(+);LDL(-);Triglycerides(-)	Protective
APOB	PVS1_VSSMP	singleton	2	21001742	AFR__CSA__EAS__EUR__OTH	0.000191078	209339	80	0	Apolipoprotein_B(-);Cholesterol(-);HDL(+);LDL(-);Triglycerides(-)	Protective
LPL	P+LP+VUS_H	0.001	8	19939442	AFR__CSA__EAS__EUR__OTH	0.00135514	194297	526.6	0	Apolipoprotein_A(-);Cholesterol(-);HDL(-);LDL(-);Triglycerides(+)	Mixed
LPL	P+LP+VUS_H	0.01	8	19939442	AFR__CSA__EAS__EUR__OTH	0.00135514	194297	526.6	0	Apolipoprotein_A(-);Cholesterol(-);HDL(-);LDL(-);Triglycerides(+)	Mixed
JAK2	P+LP	0.001	9	4985929	AFR__CSA__EUR__OTH	0.000718175	193682	258.2	10	Apolipoprotein_A(-);Apolipoprotein_B(-);Cholesterol(-);HDL(-);LDL(-)	Mixed
JAK2	P+LP	0.01	9	4985929	AFR__CSA__EUR__OTH	0.000718175	193682	258.2	10	Apolipoprotein_A(-);Apolipoprotein_B(-);Cholesterol(-);HDL(-);LDL(-)	Mixed
JAK2	P+LP+VUS_H	0.001	9	4985929	AFR__CSA__EAS__EUR__OTH	0.000950079	194297	349.2	10	Apolipoprotein_A(-);Apolipoprotein_B(-);Cholesterol(-);HDL(-);LDL(-)	Mixed
JAK2	P+LP+VUS_H	0.01	9	4985929	AFR__CSA__EAS__EUR__OTH	0.000950079	194297	349.2	10	Apolipoprotein_A(-);Apolipoprotein_B(-);Cholesterol(-);HDL(-);LDL(-)	Mixed
JAK2	D	0.001	9	4985929	AFR__CSA__EUR__OTH	0.00128045	193682	476	10	Apolipoprotein_A(-);Apolipoprotein_B(-);Cholesterol(-);HDL(-);LDL(-)	Mixed
JAK2	D	0.01	9	4985929	AFR__CSA__EUR__OTH	0.00234405	193682	888	10	Apolipoprotein_A(-);Apolipoprotein_B(-);Cholesterol(-);HDL(-);LDL(-)	Mixed
PDE3B	P+LP+VUS_H	0.01	11	14644077	AFR__CSA__EAS__EUR__OTH	0.00209907	224513	942.54	0	Apolipoprotein_A(+);Apolipoprotein_B(-);HDL(+);LDL(-);Triglycerides(-)	Protective
APOC3	PVS1_P	0.01	11	116830568	AFR__EUR__OTH	0.00208817	219570	915	1	Apolipoprotein_A(+);Apolipoprotein_B(-);HDL(+);LDL(-);Triglycerides(-)	Protective
APOC3	PVS1_VSSMP	0.01	11	116830568	AFR__CSA__EAS__EUR__OTH	0.00240298	224513	1075	2	Apolipoprotein_A(+);Apolipoprotein_B(-);HDL(+);LDL(-);Triglycerides(-)	Protective
ANGPTL3	P	0.001	1	62597568	AFR__AMR__EAS__EUR__OTH	0.000650974	221207	288	0	Apolipoprotein_A(-);Cholesterol(-);HDL(-);LDL(-);Triglycerides(-)	Mixed
ANGPTL3	P	0.01	1	62597568	AFR__AMR__EAS__EUR__OTH	0.000650974	221207	288	0	Apolipoprotein_A(-);Cholesterol(-);HDL(-);LDL(-);Triglycerides(-)	Mixed
ANGPTL3	P+LP	0.001	1	62597568	AFR__AMR__CSA__EAS__EUR__OTH	0.000809465	224840	364	0	Apolipoprotein_A(-);Cholesterol(-);HDL(-);LDL(-);Triglycerides(-)	Mixed
ANGPTL3	P+LP	0.01	1	62597568	AFR__AMR__CSA__EAS__EUR__OTH	0.000809465	224840	364	0	Apolipoprotein_A(-);Cholesterol(-);HDL(-);LDL(-);Triglycerides(-)	Mixed
ANGPTL3	PVS1_VS	0.001	1	62597568	AFR__AMR__CSA__EAS__EUR__OTH	0.000982921	224840	442	0	Apolipoprotein_A(-);Cholesterol(-);HDL(-);LDL(-);Triglycerides(-)	Mixed
ANGPTL3	PVS1_VS	0.01	1	62597568	AFR__AMR__CSA__EAS__EUR__OTH	0.000982921	224840	442	0	Apolipoprotein_A(-);Cholesterol(-);HDL(-);LDL(-);Triglycerides(-)	Mixed
ANGPTL3	PVS1_VSS	0.001	1	62597568	AFR__AMR__CSA__EAS__EUR__OTH	0.00104964	224840	472	0	Apolipoprotein_A(-);Cholesterol(-);HDL(-);LDL(-);Triglycerides(-)	Mixed
ANGPTL3	PVS1_VSS	0.01	1	62597568	AFR__AMR__CSA__EAS__EUR__OTH	0.00104964	224840	472	0	Apolipoprotein_A(-);Cholesterol(-);HDL(-);LDL(-);Triglycerides(-)	Mixed
ANGPTL3	PVS1_VSSM	0.001	1	62597568	AFR__AMR__CSA__EAS__EUR__OTH	0.00107187	224840	482	0	Apolipoprotein_A(-);Cholesterol(-);HDL(-);LDL(-);Triglycerides(-)	Mixed
ANGPTL3	PVS1_VSSM	0.01	1	62597568	AFR__AMR__CSA__EAS__EUR__OTH	0.00107187	224840	482	0	Apolipoprotein_A(-);Cholesterol(-);HDL(-);LDL(-);Triglycerides(-)	Mixed
ANGPTL3	PVS1_VSSMP	0.001	1	62597568	AFR__AMR__CSA__EAS__EUR__OTH	0.00107187	224840	482	0	Apolipoprotein_A(-);Cholesterol(-);HDL(-);LDL(-);Triglycerides(-)	Mixed
ANGPTL3	PVS1_VSSMP	0.01	1	62597568	AFR__AMR__CSA__EAS__EUR__OTH	0.00107187	224840	482	0	Apolipoprotein_A(-);Cholesterol(-);HDL(-);LDL(-);Triglycerides(-)	Mixed
APOB	P+LP+VUS_H	0.001	2	21001742	AFR__AMR__CSA__EAS__EUR__OTH	0.00191136	248830	951.2	0	Apolipoprotein_B(-);Cholesterol(-);HDL(+);LDL(-);Triglycerides(-)	Protective
APOB	P+LP+VUS_H	0.01	2	21001742	AFR__AMR__CSA__EAS__EUR__OTH	0.00191136	248830	951.2	0	Apolipoprotein_B(-);Cholesterol(-);HDL(+);LDL(-);Triglycerides(-)	Protective
APOB	P+LP+VUS_H+D	0.001	2	21001742	AFR__AMR__CSA__EAS__EUR__OTH	0.00781603	248830	3887.73	1	Apolipoprotein_B(-);Cholesterol(-);HDL(+);LDL(-);Triglycerides(-)	Protective
APOB	PVS1_VS	0.001	2	21001742	AFR__CSA__EAS__EUR__OTH	0.0010056	248468	499.72	0	Apolipoprotein_B(-);Cholesterol(-);HDL(+);LDL(-);Triglycerides(-)	Protective
APOB	PVS1_VS	0.01	2	21001742	AFR__CSA__EAS__EUR__OTH	0.0010056	248468	499.72	0	Apolipoprotein_B(-);Cholesterol(-);HDL(+);LDL(-);Triglycerides(-)	Protective
APOB	PVS1_VSSM	0.001	2	21001742	AFR__CSA__EAS__EUR__OTH	0.00126633	248468	629.28	0	Apolipoprotein_B(-);Cholesterol(-);HDL(+);LDL(-);Triglycerides(-)	Protective
APOB	PVS1_VSSM	0.01	2	21001742	AFR__CSA__EAS__EUR__OTH	0.00126633	248468	629.28	0	Apolipoprotein_B(-);Cholesterol(-);HDL(+);LDL(-);Triglycerides(-)	Protective
APOB	PVS1_VSSMP	0.001	2	21001742	AFR__CSA__EAS__EUR__OTH	0.00126633	248468	629.28	0	Apolipoprotein_B(-);Cholesterol(-);HDL(+);LDL(-);Triglycerides(-)	Protective
APOB	PVS1_VSSMP	0.01	2	21001742	AFR__CSA__EAS__EUR__OTH	0.00126633	248468	629.28	0	Apolipoprotein_B(-);Cholesterol(-);HDL(+);LDL(-);Triglycerides(-)	Protective
APOC3	P+LP+VUS_H	0.001	11	116830568	AFR__CSA__EAS__EUR__OTH	0.000352188	418810	293	1	Apolipoprotein_A(+);Apolipoprotein_B(-);HDL(+);LDL(-);Triglycerides(-)	Protective
APOC3	P+LP+VUS_H	0.01	11	116830568	AFR__CSA__EAS__EUR__OTH	0.000352188	418810	293	1	Apolipoprotein_A(+);Apolipoprotein_B(-);HDL(+);LDL(-);Triglycerides(-)	Protective
APOC3	P+LP+VUS_H+D	0.001	11	116830568	AFR__AMR__CSA__EAS__EUR__OTH	0.000764344	419314	639	1	Apolipoprotein_A(+);Apolipoprotein_B(-);HDL(+);LDL(-);Triglycerides(-)	Protective
APOC3	P+LP+VUS_H+D	0.01	11	116830568	AFR__AMR__CSA__EAS__EUR__OTH	0.000764344	419314	639	1	Apolipoprotein_A(+);Apolipoprotein_B(-);HDL(+);LDL(-);Triglycerides(-)	Protective
APOC3	PVS1_P	0.01	11	116830568	AFR__CSA__EUR__OTH	0.00215287	416885	1793	1	Apolipoprotein_A(+);Apolipoprotein_B(-);HDL(+);LDL(-);Triglycerides(-)	Protective
APOC3	PVS1_VSSM	0.001	11	116830568	AFR__CSA__EAS__EUR__OTH	0.000341444	418810	284	1	Apolipoprotein_A(+);Apolipoprotein_B(-);HDL(+);LDL(-);Triglycerides(-)	Protective
APOC3	PVS1_VSSM	0.01	11	116830568	AFR__CSA__EAS__EUR__OTH	0.000341444	418810	284	1	Apolipoprotein_A(+);Apolipoprotein_B(-);HDL(+);LDL(-);Triglycerides(-)	Protective
APOC3	PVS1_VSSMP	0.01	11	116830568	AFR__CSA__EAS__EUR__OTH	0.00248442	418810	2077	2	Apolipoprotein_A(+);Apolipoprotein_B(-);HDL(+);LDL(-);Triglycerides(-)	Protective
LCAT	P+LP+VUS_H	0.001	16	67939916	AFR__CSA__EAS__EUR__OTH	0.000524262	418810	439.13	0	Apolipoprotein_A(-);Apolipoprotein_B(+);Cholesterol(-);HDL(-);Triglycerides(+)	Mixed
LCAT	P+LP+VUS_H	0.01	16	67939916	AFR__CSA__EAS__EUR__OTH	0.000524262	418810	439.13	0	Apolipoprotein_A(-);Apolipoprotein_B(+);Cholesterol(-);HDL(-);Triglycerides(+)	Mixed
LCAT	P+LP+VUS_H+D	0.001	16	67939916	AFR__CSA__EAS__EUR__OTH	0.000870481	418810	729.13	0	Apolipoprotein_A(-);Apolipoprotein_B(+);Cholesterol(-);HDL(-);Triglycerides(+)	Mixed
LCAT	P+LP+VUS_H+D	0.01	16	67939916	AFR__CSA__EAS__EUR__OTH	0.000870481	418810	729.13	0	Apolipoprotein_A(-);Apolipoprotein_B(+);Cholesterol(-);HDL(-);Triglycerides(+)	Mixed
LDLR	P+LP	0.001	19	11089550	AFR__AMR__CSA__EAS__EUR__OTH	0.00170269	419314	1427.93	0	Apolipoprotein_A(-);Apolipoprotein_B(+);Cholesterol(+);LDL(+);Triglycerides(-)	Mixed
LDLR	P+LP	0.01	19	11089550	AFR__AMR__CSA__EAS__EUR__OTH	0.00170269	419314	1427.93	0	Apolipoprotein_A(-);Apolipoprotein_B(+);Cholesterol(+);LDL(+);Triglycerides(-)	Mixed
ANGPTL3	D	0.001	1	62597568	AFR__AMR__CSA__EUR__OTH	0.0010699	417389	893.13	0	Apolipoprotein_A(-);Cholesterol(-);HDL(-);LDL(-);Triglycerides(-)	Mixed
ANGPTL3	D	0.01	1	62597568	AFR__AMR__CSA__EUR__OTH	0.0010699	417389	893.13	0	Apolipoprotein_A(-);Cholesterol(-);HDL(-);LDL(-);Triglycerides(-)	Mixed
APOB	P+LP	0.001	2	21001742	AFR__AMR__CSA__EAS__EUR__OTH	0.00174114	458351	1594.11	1	Apolipoprotein_B(-);Cholesterol(-);HDL(+);LDL(-);Triglycerides(-)	Protective
APOB	P+LP	0.01	2	21001742	AFR__AMR__CSA__EAS__EUR__OTH	0.00174114	458351	1594.11	1	Apolipoprotein_B(-);Cholesterol(-);HDL(+);LDL(-);Triglycerides(-)	Protective
APOB	P+LP+VUS_H	0.001	2	21001742	AFR__AMR__CSA__EAS__EUR__OTH	0.00180256	458351	1650.41	1	Apolipoprotein_B(-);Cholesterol(-);HDL(+);LDL(-);Triglycerides(-)	Protective
APOB	P+LP+VUS_H	0.01	2	21001742	AFR__AMR__CSA__EAS__EUR__OTH	0.00180256	458351	1650.41	1	Apolipoprotein_B(-);Cholesterol(-);HDL(+);LDL(-);Triglycerides(-)	Protective
APOB	P+LP+VUS_H+D	0.001	2	21001742	AFR__AMR__CSA__EAS__EUR__OTH	0.00772767	458351	7079.97	2	Apolipoprotein_B(-);Cholesterol(-);HDL(+);LDL(-);Triglycerides(-)	Protective
APOB	PVS1_VSS	0.001	2	21001742	AFR__CSA__EAS__EUR__OTH	0.000959727	457807	878.74	0	Apolipoprotein_B(-);Cholesterol(-);HDL(+);LDL(-);Triglycerides(-)	Protective
APOB	PVS1_VSS	0.01	2	21001742	AFR__CSA__EAS__EUR__OTH	0.000959727	457807	878.74	0	Apolipoprotein_B(-);Cholesterol(-);HDL(+);LDL(-);Triglycerides(-)	Protective
APOB	PVS1_VSSM	0.001	2	21001742	AFR__CSA__EAS__EUR__OTH	0.00112464	457807	1029.74	0	Apolipoprotein_B(-);Cholesterol(-);HDL(+);LDL(-);Triglycerides(-)	Protective
APOB	PVS1_VSSM	0.01	2	21001742	AFR__CSA__EAS__EUR__OTH	0.00112464	457807	1029.74	0	Apolipoprotein_B(-);Cholesterol(-);HDL(+);LDL(-);Triglycerides(-)	Protective
APOB	PVS1_VSSMP	0.001	2	21001742	AFR__CSA__EAS__EUR__OTH	0.00112464	457807	1029.74	0	Apolipoprotein_B(-);Cholesterol(-);HDL(+);LDL(-);Triglycerides(-)	Protective
APOB	PVS1_VSSMP	0.01	2	21001742	AFR__CSA__EAS__EUR__OTH	0.00112464	457807	1029.74	0	Apolipoprotein_B(-);Cholesterol(-);HDL(+);LDL(-);Triglycerides(-)	Protective
JAK2	P+LP	0.001	9	4985929	AFR__CSA__EUR__OTH	0.000628787	416885	490.26	17	Apolipoprotein_A(-);Apolipoprotein_B(-);Cholesterol(-);HDL(-);LDL(-)	Mixed
JAK2	P+LP	0.01	9	4985929	AFR__CSA__EUR__OTH	0.000628787	416885	490.26	17	Apolipoprotein_A(-);Apolipoprotein_B(-);Cholesterol(-);HDL(-);LDL(-)	Mixed
JAK2	P+LP+VUS_H	0.001	9	4985929	AFR__CSA__EAS__EUR__OTH	0.000840792	418810	670.26	17	Apolipoprotein_A(-);Apolipoprotein_B(-);Cholesterol(-);HDL(-);LDL(-)	Mixed
JAK2	P+LP+VUS_H	0.01	9	4985929	AFR__CSA__EAS__EUR__OTH	0.000840792	418810	670.26	17	Apolipoprotein_A(-);Apolipoprotein_B(-);Cholesterol(-);HDL(-);LDL(-)	Mixed
JAK2	D	0.001	9	4985929	AFR__CSA__EAS__EUR__OTH	0.00117768	418810	952.45	17	Apolipoprotein_A(-);Apolipoprotein_B(-);Cholesterol(-);HDL(-);LDL(-)	Mixed
APOC3	P+LP+VUS_H	0.001	11	116830568	AFR__CSA__EUR__OTH	0.000340765	193682	132	0	Apolipoprotein_A(+);Apolipoprotein_B(-);HDL(+);Triglycerides(-)	Protective
APOC3	P+LP+VUS_H	0.01	11	116830568	AFR__CSA__EUR__OTH	0.000340765	193682	132	0	Apolipoprotein_A(+);Apolipoprotein_B(-);HDL(+);Triglycerides(-)	Protective
APOC3	PVS1_VSSM	0.001	11	116830568	AFR__CSA__EUR__OTH	0.000320112	193682	124	0	Apolipoprotein_A(+);Apolipoprotein_B(-);HDL(+);Triglycerides(-)	Protective
APOC3	PVS1_VSSM	0.01	11	116830568	AFR__CSA__EUR__OTH	0.000320112	193682	124	0	Apolipoprotein_A(+);Apolipoprotein_B(-);HDL(+);Triglycerides(-)	Protective
SH2B3	P+LP+VUS_H+D	0.01	12	111418109	AFR__AMR__CSA__EAS__EUR__OTH	0.00460934	194474	1784.79	4	Apolipoprotein_A(-);Cholesterol(-);HDL(-);LDL(-)	Mixed
SH2B3	D	0.01	12	111418109	AFR__AMR__CSA__EAS__EUR__OTH	0.00435534	194474	1686	4	Apolipoprotein_A(-);Cholesterol(-);HDL(-);LDL(-)	Mixed
TM6SF2	P+LP+VUS_H+D	0.001	19	19264673	AFR__AMR__CSA__EAS__EUR__OTH	0.00295946	209521	1240.14	0	Apolipoprotein_B(-);Cholesterol(-);LDL(-);Triglycerides(-)	Protective
TM6SF2	P+LP+VUS_H+D	0.01	19	19264673	AFR__AMR__CSA__EAS__EUR__OTH	0.00295946	209521	1240.14	0	Apolipoprotein_B(-);Cholesterol(-);LDL(-);Triglycerides(-)	Protective
TM6SF2	D	0.001	19	19264673	AFR__AMR__CSA__EAS__EUR__OTH	0.00271469	209521	1137.57	0	Apolipoprotein_B(-);Cholesterol(-);LDL(-);Triglycerides(-)	Protective
TM6SF2	D	0.01	19	19264673	AFR__AMR__CSA__EAS__EUR__OTH	0.00271469	209521	1137.57	0	Apolipoprotein_B(-);Cholesterol(-);LDL(-);Triglycerides(-)	Protective
PCSK9	P+LP+VUS_H+D	0.01	1	55039838	AFR__AMR__CSA__EAS__EUR__OTH	0.00422713	194474	1642.13	1	Apolipoprotein_A(+);Apolipoprotein_B(-);Cholesterol(-);LDL(-)	Protective
ANGPTL3	P	0.001	1	62597568	AMR__EUR__OTH	0.000592195	186594	221	0	Apolipoprotein_A(-);Cholesterol(-);LDL(-);Triglycerides(-)	Mixed
ANGPTL3	P	0.01	1	62597568	AMR__EAS__EUR__OTH	0.000595591	187209	223	0	Apolipoprotein_A(-);Cholesterol(-);LDL(-);Triglycerides(-)	Mixed
APOB	P+LP	0.001	2	21001742	AFR__CSA__EAS__EUR__OTH	0.00161699	209339	675	1	Apolipoprotein_B(-);Cholesterol(-);LDL(-);Triglycerides(-)	Protective
APOB	P+LP	0.01	2	21001742	AFR__CSA__EAS__EUR__OTH	0.00161699	209339	675	1	Apolipoprotein_B(-);Cholesterol(-);LDL(-);Triglycerides(-)	Protective
APOB	P+LP+VUS_H	0.001	2	21001742	AFR__CSA__EAS__EUR__OTH	0.00167766	209339	700.4	1	Apolipoprotein_B(-);Cholesterol(-);LDL(-);Triglycerides(-)	Protective
APOB	P+LP+VUS_H	0.01	2	21001742	AFR__CSA__EAS__EUR__OTH	0.00167766	209339	700.4	1	Apolipoprotein_B(-);Cholesterol(-);LDL(-);Triglycerides(-)	Protective
APOB	P+LP+VUS_H+D	0.001	2	21001742	AFR__AMR__CSA__EAS__EUR__OTH	0.00941503	209521	3921.29	12	Apolipoprotein_B(-);Cholesterol(-);LDL(-);Triglycerides(-)	Protective
APOB	P+LP+VUS_H+D	0.01	2	21001742	AFR__AMR__CSA__EAS__EUR__OTH	0.0146687	209521	6120.79	13	Apolipoprotein_B(-);Cholesterol(-);LDL(-);Triglycerides(-)	Protective
APOB	PVS1_VSSM	0.001	2	21001742	AFR__CSA__EAS__EUR__OTH	0.000994553	209339	416.4	0	Apolipoprotein_B(-);Cholesterol(-);LDL(-);Triglycerides(-)	Protective
APOB	PVS1_VSSM	0.01	2	21001742	AFR__CSA__EAS__EUR__OTH	0.00100172	209339	419.4	0	Apolipoprotein_B(-);Cholesterol(-);LDL(-);Triglycerides(-)	Protective
APOB	PVS1_VSSMP	0.001	2	21001742	AFR__CSA__EAS__EUR__OTH	0.000994553	209339	416.4	0	Apolipoprotein_B(-);Cholesterol(-);LDL(-);Triglycerides(-)	Protective
APOB	PVS1_VSSMP	0.01	2	21001742	AFR__CSA__EAS__EUR__OTH	0.00100172	209339	419.4	0	Apolipoprotein_B(-);Cholesterol(-);LDL(-);Triglycerides(-)	Protective
LPL	P+LP	0.001	8	19939442	AFR__CSA__EAS__EUR__OTH	0.00115184	194297	447.6	0	Apolipoprotein_A(-);Cholesterol(-);HDL(-);Triglycerides(+)	Mixed
LPL	P+LP	0.01	8	19939442	AFR__CSA__EAS__EUR__OTH	0.00115184	194297	447.6	0	Apolipoprotein_A(-);Cholesterol(-);HDL(-);Triglycerides(+)	Mixed
LPL	P+LP+VUS_H+D	0.001	8	19939442	AFR__CSA__EAS__EUR__OTH	0.00148123	194297	575.6	0	Apolipoprotein_A(-);Cholesterol(-);HDL(-);Triglycerides(+)	Mixed
LPL	P+LP+VUS_H+D	0.01	8	19939442	AFR__CSA__EAS__EUR__OTH	0.00148123	194297	575.6	0	Apolipoprotein_A(-);Cholesterol(-);HDL(-);Triglycerides(+)	Mixed
LPL	D	0.001	8	19939442	AFR__CSA__EAS__EUR__OTH	0.00128926	194297	501	0	Apolipoprotein_A(-);Cholesterol(-);HDL(-);Triglycerides(+)	Mixed
LPL	D	0.01	8	19939442	AFR__CSA__EAS__EUR__OTH	0.00128926	194297	501	0	Apolipoprotein_A(-);Cholesterol(-);HDL(-);Triglycerides(+)	Mixed
JAK2	P+LP+VUS_H+D	0.001	9	4985929	AFR__CSA__EAS__EUR__OTH	0.00152652	194297	573.2	10	Apolipoprotein_A(-);Cholesterol(-);HDL(-);LDL(-)	Mixed
JAK2	P+LP+VUS_H+D	0.01	9	4985929	AFR__CSA__EAS__EUR__OTH	0.00260136	209339	1065.13	12	Apolipoprotein_B(-);Cholesterol(-);HDL(-);LDL(-)	Mixed
PDE3B	P+LP	0.01	11	14644077	AFR__CSA__EAS__EUR__OTH	0.00131738	224513	591.54	0	Apolipoprotein_A(+);Apolipoprotein_B(-);HDL(+);Triglycerides(-)	Protective
PDE3B	P+LP+VUS_H	0.001	11	14644077	AFR__CSA__EAS__EUR__OTH	0.00209907	224513	942.54	0	Apolipoprotein_A(+);Apolipoprotein_B(-);HDL(+);Triglycerides(-)	Protective
PDE3B	P+LP+VUS_H+D	0.001	11	14644077	AFR__AMR__CSA__EAS__EUR__OTH	0.00268904	224840	1209.21	0	Apolipoprotein_A(+);Apolipoprotein_B(-);HDL(+);Triglycerides(-)	Protective
PDE3B	P+LP+VUS_H+D	0.01	11	14644077	AFR__AMR__CSA__EAS__EUR__OTH	0.00489506	224840	2201.21	0	Apolipoprotein_A(+);Apolipoprotein_B(-);HDL(+);Triglycerides(-)	Protective
PDE3B	PVS1_VS	0.01	11	14644077	AFR__CSA__EAS__EUR__OTH	0.00132183	224513	593.54	0	Apolipoprotein_A(+);Apolipoprotein_B(-);HDL(+);Triglycerides(-)	Protective
PDE3B	PVS1_VSS	0.01	11	14644077	AFR__CSA__EAS__EUR__OTH	0.00134856	224513	605.54	0	Apolipoprotein_A(+);Apolipoprotein_B(-);HDL(+);Triglycerides(-)	Protective
PDE3B	PVS1_VSSM	0.01	11	14644077	AFR__CSA__EAS__EUR__OTH	0.00137751	224513	618.54	0	Apolipoprotein_A(+);Apolipoprotein_B(-);HDL(+);Triglycerides(-)	Protective
PDE3B	PVS1_VSSMP	0.01	11	14644077	AFR__CSA__EAS__EUR__OTH	0.00138419	224513	621.54	0	Apolipoprotein_A(+);Apolipoprotein_B(-);HDL(+);Triglycerides(-)	Protective
LIPC	P+LP+VUS_H+D	0.001	15	58432041	AFR__AMR__CSA__EAS__EUR__OTH	0.00324085	224840	1457.34	0	Apolipoprotein_A(+);Cholesterol(+);HDL(+);Triglycerides(+)	Mixed
LIPC	P+LP+VUS_H+D	0.01	15	58432041	AFR__AMR__CSA__EAS__EUR__OTH	0.00634083	224840	2845.34	3	Apolipoprotein_A(+);Cholesterol(+);HDL(+);Triglycerides(+)	Mixed
LIPC	D	0.01	15	58432041	AFR__AMR__CSA__EAS__EUR__OTH	0.0054212	224840	2431.81	3	Apolipoprotein_A(+);Cholesterol(+);HDL(+);Triglycerides(+)	Mixed
LCAT	P+LP+VUS_H	0.001	16	67939916	AFR__CSA__EUR__OTH	0.000512986	223203	229	0	Apolipoprotein_A(-);Apolipoprotein_B(+);Cholesterol(-);HDL(-)	Mixed
LCAT	P+LP+VUS_H	0.01	16	67939916	AFR__CSA__EUR__OTH	0.000512986	223203	229	0	Apolipoprotein_A(-);Apolipoprotein_B(+);Cholesterol(-);HDL(-)	Mixed
ANGPTL3	D	0.001	1	62597568	AFR__AMR__CSA__EUR__OTH	0.0010279	223530	459.53	0	Apolipoprotein_A(-);Cholesterol(-);LDL(-);Triglycerides(-)	Mixed
ANGPTL3	D	0.01	1	62597568	AFR__AMR__CSA__EUR__OTH	0.0010279	223530	459.53	0	Apolipoprotein_A(-);Cholesterol(-);LDL(-);Triglycerides(-)	Mixed
APOB	P+LP	0.001	2	21001742	AFR__AMR__CSA__EAS__EUR__OTH	0.00184906	248830	920.2	0	Apolipoprotein_B(-);Cholesterol(-);LDL(-);Triglycerides(-)	Protective
APOB	P+LP	0.01	2	21001742	AFR__AMR__CSA__EAS__EUR__OTH	0.00184906	248830	920.2	0	Apolipoprotein_B(-);Cholesterol(-);LDL(-);Triglycerides(-)	Protective
APOB	P+LP+VUS_H+D	singleton	2	21001742	AFR__AMR__CSA__EAS__EUR__OTH	0.000819274	248830	407.72	0	Apolipoprotein_B(-);Cholesterol(-);LDL(-);Triglycerides(-)	Protective
APOB	P+LP+VUS_H+D	0.01	2	21001742	AFR__AMR__CSA__EAS__EUR__OTH	0.0151866	248830	7469.77	44	Apolipoprotein_B(-);Cholesterol(-);LDL(-);Triglycerides(-)	Protective
APOB	PVS1_VSS	0.001	2	21001742	AFR__CSA__EAS__EUR__OTH	0.00110534	248468	549.28	0	Apolipoprotein_B(-);Cholesterol(-);LDL(-);Triglycerides(-)	Protective
APOB	PVS1_VSS	0.01	2	21001742	AFR__CSA__EAS__EUR__OTH	0.00110534	248468	549.28	0	Apolipoprotein_B(-);Cholesterol(-);LDL(-);Triglycerides(-)	Protective
APOB	PVS1_VSSM	singleton	2	21001742	AFR__CSA__EAS__EUR__OTH	0.000196645	248468	97.72	0	Apolipoprotein_B(-);Cholesterol(-);LDL(-);Triglycerides(-)	Protective
APOB	PVS1_VSSMP	singleton	2	21001742	AFR__CSA__EAS__EUR__OTH	0.000196645	248468	97.72	0	Apolipoprotein_B(-);Cholesterol(-);LDL(-);Triglycerides(-)	Protective
PLA2G12A	P+LP+VUS_H+D	0.01	4	109714392	AFR__AMR__CSA__EAS__EUR__OTH	0.00930011	224840	4150.08	16	Apolipoprotein_A(-);HDL(-);LDL(+);Triglycerides(+)	Atherogenic
TIMD4	P+LP+VUS_H	0.001	5	156919457	AFR__AMR__CSA__EAS__EUR__OTH	0.000634972	248830	312	2	Apolipoprotein_B(+);Cholesterol(+);LDL(+);Triglycerides(+)	Atherogenic
TIMD4	P+LP+VUS_H	0.01	5	156919457	AFR__AMR__CSA__EAS__EUR__OTH	0.000634972	248830	312	2	Apolipoprotein_B(+);Cholesterol(+);LDL(+);Triglycerides(+)	Atherogenic
TIMD4	P+LP+VUS_H+D	0.001	5	156919457	AFR__AMR__CSA__EAS__EUR__OTH	0.000874091	248830	431	2	Apolipoprotein_B(+);Cholesterol(+);LDL(+);Triglycerides(+)	Atherogenic
TIMD4	P+LP+VUS_H+D	0.01	5	156919457	AFR__AMR__CSA__EAS__EUR__OTH	0.000874091	248830	431	2	Apolipoprotein_B(+);Cholesterol(+);LDL(+);Triglycerides(+)	Atherogenic
LPL	P+LP+VUS_H	0.001	8	19939442	AFR__CSA__EAS__EUR__OTH	0.00134855	224513	605.53	0	Apolipoprotein_A(-);Apolipoprotein_B(+);HDL(-);Triglycerides(+)	Atherogenic
LPL	P+LP+VUS_H	0.01	8	19939442	AFR__CSA__EAS__EUR__OTH	0.00134855	224513	605.53	0	Apolipoprotein_A(-);Apolipoprotein_B(+);HDL(-);Triglycerides(+)	Atherogenic
LPL	P+LP+VUS_H+D	0.001	8	19939442	AFR__AMR__CSA__EAS__EUR__OTH	0.00147112	224840	661.53	0	Apolipoprotein_A(-);Apolipoprotein_B(+);HDL(-);Triglycerides(+)	Atherogenic
LPL	P+LP+VUS_H+D	0.01	8	19939442	AFR__AMR__CSA__EAS__EUR__OTH	0.00148002	224840	665.53	0	Apolipoprotein_A(-);Apolipoprotein_B(+);HDL(-);Triglycerides(+)	Atherogenic
LPL	D	0.001	8	19939442	AFR__AMR__CSA__EAS__EUR__OTH	0.00128536	224840	578	0	Apolipoprotein_A(-);Apolipoprotein_B(+);HDL(-);Triglycerides(+)	Atherogenic
LPL	D	0.01	8	19939442	AFR__AMR__CSA__EAS__EUR__OTH	0.00129425	224840	582	0	Apolipoprotein_A(-);Apolipoprotein_B(+);HDL(-);Triglycerides(+)	Atherogenic
ABCA1	P+LP	0.001	9	104784318	AFR__CSA__EAS__EUR__OTH	0.000835141	224513	375	0	Apolipoprotein_A(-);Cholesterol(-);HDL(-);LDL(-)	Mixed
ABCA1	P+LP	0.01	9	104784318	AFR__CSA__EAS__EUR__OTH	0.000835141	224513	375	0	Apolipoprotein_A(-);Cholesterol(-);HDL(-);LDL(-)	Mixed
ABCA1	P+LP+VUS_H	0.01	9	104784318	AFR__AMR__CSA__EAS__EUR__OTH	0.00165482	224840	744.14	0	Apolipoprotein_A(-);Cholesterol(-);HDL(-);LDL(-)	Mixed
ABCA1	P+LP+VUS_H+D	0.001	9	104784318	AFR__AMR__CSA__EAS__EUR__OTH	0.00619939	224840	2781.74	3	Apolipoprotein_A(-);Cholesterol(-);HDL(-);LDL(-)	Mixed
ABCA1	P+LP+VUS_H+D	0.01	9	104784318	AFR__AMR__CSA__EAS__EUR__OTH	0.0117856	224840	5281.75	9	Apolipoprotein_A(-);Cholesterol(-);HDL(-);LDL(-)	Mixed
ABCA1	D	0.01	9	104784318	AFR__AMR__CSA__EAS__EUR__OTH	0.0113707	224840	5095.2	9	Apolipoprotein_A(-);Cholesterol(-);HDL(-);LDL(-)	Mixed
PDE3B	P+LP	0.001	11	14644077	AFR__CSA__EAS__EUR__OTH	0.00129685	418810	1086.27	0	Apolipoprotein_A(+);Apolipoprotein_B(-);HDL(+);Triglycerides(-)	Protective
PDE3B	P+LP	0.01	11	14644077	AFR__CSA__EAS__EUR__OTH	0.00129685	418810	1086.27	0	Apolipoprotein_A(+);Apolipoprotein_B(-);HDL(+);Triglycerides(-)	Protective
PDE3B	P+LP+VUS_H	0.001	11	14644077	AFR__CSA__EAS__EUR__OTH	0.00207777	418810	1740.39	0	Apolipoprotein_A(+);Apolipoprotein_B(-);HDL(+);Triglycerides(-)	Protective
PDE3B	P+LP+VUS_H	0.01	11	14644077	AFR__CSA__EAS__EUR__OTH	0.00207777	418810	1740.39	0	Apolipoprotein_A(+);Apolipoprotein_B(-);HDL(+);Triglycerides(-)	Protective
PDE3B	P+LP+VUS_H+D	0.001	11	14644077	AFR__AMR__CSA__EAS__EUR__OTH	0.00270003	419314	2264.32	0	Apolipoprotein_A(+);Apolipoprotein_B(-);HDL(+);Triglycerides(-)	Protective
PDE3B	P+LP+VUS_H+D	0.01	11	14644077	AFR__AMR__CSA__EAS__EUR__OTH	0.00497636	419314	4171.32	1	Apolipoprotein_A(+);Apolipoprotein_B(-);HDL(+);Triglycerides(-)	Protective
PDE3B	PVS1_VS	0.001	11	14644077	AFR__CSA__EAS__EUR__OTH	0.00130163	418810	1090.27	0	Apolipoprotein_A(+);Apolipoprotein_B(-);HDL(+);Triglycerides(-)	Protective
PDE3B	PVS1_VS	0.01	11	14644077	AFR__CSA__EAS__EUR__OTH	0.00130163	418810	1090.27	0	Apolipoprotein_A(+);Apolipoprotein_B(-);HDL(+);Triglycerides(-)	Protective
PDE3B	PVS1_VSS	0.001	11	14644077	AFR__CSA__EAS__EUR__OTH	0.00133744	418810	1120.27	0	Apolipoprotein_A(+);Apolipoprotein_B(-);HDL(+);Triglycerides(-)	Protective
PDE3B	PVS1_VSS	0.01	11	14644077	AFR__CSA__EAS__EUR__OTH	0.00133744	418810	1120.27	0	Apolipoprotein_A(+);Apolipoprotein_B(-);HDL(+);Triglycerides(-)	Protective
PDE3B	PVS1_VSSM	0.001	11	14644077	AFR__CSA__EAS__EUR__OTH	0.00136848	418810	1146.27	0	Apolipoprotein_A(+);Apolipoprotein_B(-);HDL(+);Triglycerides(-)	Protective
PDE3B	PVS1_VSSM	0.01	11	14644077	AFR__CSA__EAS__EUR__OTH	0.00136848	418810	1146.27	0	Apolipoprotein_A(+);Apolipoprotein_B(-);HDL(+);Triglycerides(-)	Protective
PDE3B	PVS1_VSSMP	0.001	11	14644077	AFR__CSA__EAS__EUR__OTH	0.00137684	418810	1153.27	0	Apolipoprotein_A(+);Apolipoprotein_B(-);HDL(+);Triglycerides(-)	Protective
PDE3B	PVS1_VSSMP	0.01	11	14644077	AFR__CSA__EAS__EUR__OTH	0.00137684	418810	1153.27	0	Apolipoprotein_A(+);Apolipoprotein_B(-);HDL(+);Triglycerides(-)	Protective
APOC3	P+LP	0.001	11	116830568	AFR__CSA__EAS__EUR__OTH	0.000322342	418810	268	1	Apolipoprotein_A(+);Apolipoprotein_B(-);HDL(+);Triglycerides(-)	Protective
APOC3	P+LP	0.01	11	116830568	AFR__CSA__EAS__EUR__OTH	0.000322342	418810	268	1	Apolipoprotein_A(+);Apolipoprotein_B(-);HDL(+);Triglycerides(-)	Protective
APOC3	PVS1_VS	0.001	11	116830568	AFR__CSA__EAS__EUR__OTH	0.000322342	418810	268	1	Apolipoprotein_A(+);Apolipoprotein_B(-);HDL(+);Triglycerides(-)	Protective
APOC3	PVS1_VS	0.01	11	116830568	AFR__CSA__EAS__EUR__OTH	0.000322342	418810	268	1	Apolipoprotein_A(+);Apolipoprotein_B(-);HDL(+);Triglycerides(-)	Protective
APOC3	PVS1_VSS	0.001	11	116830568	AFR__CSA__EAS__EUR__OTH	0.000325923	418810	271	1	Apolipoprotein_A(+);Apolipoprotein_B(-);HDL(+);Triglycerides(-)	Protective
APOC3	PVS1_VSS	0.01	11	116830568	AFR__CSA__EAS__EUR__OTH	0.000325923	418810	271	1	Apolipoprotein_A(+);Apolipoprotein_B(-);HDL(+);Triglycerides(-)	Protective
APOC3	PVS1_VSSMP	0.001	11	116830568	AFR__CSA__EAS__EUR__OTH	0.000368902	418810	307	1	Apolipoprotein_A(+);Apolipoprotein_B(-);HDL(+);Triglycerides(-)	Protective
SH2B3	P+LP+VUS_H+D	0.01	12	111418109	AFR__AMR__CSA__EAS__EUR__OTH	0.00461055	419314	3852.54	7	Apolipoprotein_A(-);Cholesterol(-);HDL(-);LDL(-)	Mixed
SH2B3	D	0.01	12	111418109	AFR__AMR__CSA__EAS__EUR__OTH	0.0043595	419314	3642	7	Apolipoprotein_A(-);Cholesterol(-);HDL(-);LDL(-)	Mixed
GAS6	P+LP+VUS_H	0.001	13	113820873	AFR__CSA__EAS__EUR__OTH	0.000286492	457807	262.32	0	Apolipoprotein_B(+);Cholesterol(+);LDL(+);Triglycerides(+)	Atherogenic
GAS6	P+LP+VUS_H	0.01	13	113820873	AFR__CSA__EAS__EUR__OTH	0.000286492	457807	262.32	0	Apolipoprotein_B(+);Cholesterol(+);LDL(+);Triglycerides(+)	Atherogenic
GAS6	PVS1_VSS	0.001	13	113820873	AFR__CSA__EAS__EUR__OTH	0.000170723	457807	156.32	0	Apolipoprotein_B(+);Cholesterol(+);LDL(+);Triglycerides(+)	Atherogenic
GAS6	PVS1_VSS	0.01	13	113820873	AFR__CSA__EAS__EUR__OTH	0.000170723	457807	156.32	0	Apolipoprotein_B(+);Cholesterol(+);LDL(+);Triglycerides(+)	Atherogenic
GAS6	PVS1_VSSM	0.001	13	113820873	AFR__AMR__CSA__EAS__EUR__OTH	0.000214155	458351	196.32	0	Apolipoprotein_B(+);Cholesterol(+);LDL(+);Triglycerides(+)	Atherogenic
GAS6	PVS1_VSSM	0.01	13	113820873	AFR__AMR__CSA__EAS__EUR__OTH	0.000214155	458351	196.32	0	Apolipoprotein_B(+);Cholesterol(+);LDL(+);Triglycerides(+)	Atherogenic
GAS6	PVS1_VSSMP	0.001	13	113820873	AFR__AMR__CSA__EAS__EUR__OTH	0.000214155	458351	196.32	0	Apolipoprotein_B(+);Cholesterol(+);LDL(+);Triglycerides(+)	Atherogenic
GAS6	PVS1_VSSMP	0.01	13	113820873	AFR__AMR__CSA__EAS__EUR__OTH	0.000214155	458351	196.32	0	Apolipoprotein_B(+);Cholesterol(+);LDL(+);Triglycerides(+)	Atherogenic
LIPC	P+LP+VUS_H+D	0.01	15	58432041	AFR__AMR__CSA__EAS__EUR__OTH	0.00657247	419314	5493.85	9	Apolipoprotein_A(+);Cholesterol(+);HDL(+);Triglycerides(+)	Mixed
LIPC	D	0.01	15	58432041	AFR__AMR__CSA__EAS__EUR__OTH	0.00560167	419314	4679.72	9	Apolipoprotein_A(+);Cholesterol(+);HDL(+);Triglycerides(+)	Mixed
PLIN1	P+LP+VUS_H	0.01	15	89665586	AFR__AMR__CSA__EAS__EUR__OTH	0.00246029	419314	2059.27	2	Apolipoprotein_A(+);Apolipoprotein_B(-);HDL(+);Triglycerides(-)	Protective
PLIN1	P+LP+VUS_H+D	0.01	15	89665586	AFR__AMR__CSA__EAS__EUR__OTH	0.00283352	419314	2372.27	2	Apolipoprotein_A(+);Apolipoprotein_B(-);HDL(+);Triglycerides(-)	Protective
LCAT	P+LP	0.001	16	67939916	AFR__CSA__EAS__EUR__OTH	0.000334438	418810	280.13	0	Apolipoprotein_A(-);Cholesterol(-);HDL(-);Triglycerides(+)	Mixed
LCAT	P+LP	0.01	16	67939916	AFR__CSA__EAS__EUR__OTH	0.000334438	418810	280.13	0	Apolipoprotein_A(-);Cholesterol(-);HDL(-);Triglycerides(+)	Mixed
LDLR	P	0.001	19	11089550	AFR__AMR__CSA__EAS__EUR__OTH	0.0012266	419314	1028.66	0	Apolipoprotein_A(-);Apolipoprotein_B(+);Cholesterol(+);LDL(+)	Atherogenic
LDLR	P	0.01	19	11089550	AFR__AMR__CSA__EAS__EUR__OTH	0.0012266	419314	1028.66	0	Apolipoprotein_A(-);Apolipoprotein_B(+);Cholesterol(+);LDL(+)	Atherogenic
LDLR	P+LP+VUS_H	0.001	19	11089550	AFR__AMR__CSA__EAS__EUR__OTH	0.0020284	419314	1701.08	0	Apolipoprotein_A(-);Apolipoprotein_B(+);Cholesterol(+);LDL(+)	Atherogenic
LDLR	P+LP+VUS_H	0.01	19	11089550	AFR__AMR__CSA__EAS__EUR__OTH	0.0020284	419314	1701.08	0	Apolipoprotein_A(-);Apolipoprotein_B(+);Cholesterol(+);LDL(+)	Atherogenic
LDLR	P+LP+VUS_H+D	0.001	19	11089550	AFR__AMR__CSA__EAS__EUR__OTH	0.00215361	419314	1806.08	0	Apolipoprotein_A(-);Apolipoprotein_B(+);Cholesterol(+);LDL(+)	Atherogenic
[truncated: 2,135 more rows]

## Sheet: S. Table 8
#Supplementary Table 8. Summary of diabetes mellitus associations through HbA1c and Glucose levels.
[truncated: 378 more rows]

[truncated: 3 more sheets: S. Table 9, S. Table 10, S. Table 11]
